# Supplementary material for: Taxonomic Novelty and Distinctive Genomic Features of Hot Spring Cyanobacteria
Source: Front Genet. 2020 Nov 5;11:568223. doi: 10.3389/fgene.2020.568223 (PMC7674949; doi:10.3389/fgene.2020.568223)
Supplement: Supplementary file 5 [file Table_4.xlsx]

## Sheet: Table_S4
Orthogroup	C42_CAH2020_001_FF	C42_CAH2020_010_FF	C42_CAH2020_014_FF	C42_CAH2020_026_FF	C42_CAH2020_037_FF	C42_CAH2020_038_FF	C42_CAH2020_052_FF	C42_CAH2020_066_FF	C42_CAH2020_068_FF	C42_CAH2020_084_FF	C42_CAH2020_086_FF	C42_CAH2020_099_FF	GCA_001314905.1_ASM131490v1_protein	GCA_001657325.1_ASM165732v1_genomic_protein	GCA_002148405.1_ASM214840v1_protein	GCA_002286845.1_ASM228684v1_protein	GCA_002361335.1_ASM236133v1_genomic_protein	GCA_002482705.1_ASM248270v1_genomic_protein	GCA_002796835.1_ASM279683v1_genomic_protein	GCA_002813895.1_ASM281389v1_protein	GCA_003261315.1_ASM326131v1_protein	GCA_003555505.1_ASM355550v1_protein	GCA_003695655.1_ASM369565v1_protein	GCA_003695795.1_ASM369579v1_protein	GCA_003695985.1_ASM369598v1_protein	GCA_003724315.1_ASM372431v1_protein	GCA_004293855.1_ASM429385v1_protein	GCA_004296455.1_ASM429645v1_protein	GCA_004299065.1_ASM429906v1_protein	GCA_007131565.1_ASM713156v1_genomic_protein	GCA_007692715.1_ASM769271v1_protein	GCA_007693465.1_ASM769346v1_protein	GCA_007694125.1_ASM769412v1_protein	GCF_000011345.1_ASM1134v1_protein	GCF_000011385.1_ASM1138v1_protein	GCF_000013205.1_ASM1320v1_protein	GCF_000013225.1_ASM1322v1_protein	GCF_000018105.1_ASM1810v1_protein	GCF_000022045.1_ASM2204v1_protein	GCF_000204075.1_ASM20407v1_protein	GCF_000231365.1_ASM23136v1_protein	GCF_000238775.1_ASM23877v2_protein	GCF_000309945.1_ASM30994v1_protein	GCF_000315585.1_ASM31558v1_protein	GCF_000316645.1_ASM31664v1_protein	GCF_000316665.1_ASM31666v1_protein	GCF_000316685.1_ASM31668v1_protein	GCF_000317025.1_ASM31702v1_protein	GCF_000317105.1_ASM31710v1_protein
Environment	Hot_spring	Hot_spring	Hot_spring	Hot_spring	Hot_spring	Hot_spring	Hot_spring	Hot_spring	Hot_spring	Hot_spring	Hot_spring	Hot_spring	Non_thermal	Non_thermal	Non_thermal	Non_thermal	Non_thermal	Non_thermal	Non_thermal	Non_thermal	Non_thermal	Hot_spring	Hot_spring	Hot_spring	Hot_spring	Non_thermal	Non_thermal	Non_thermal	Non_thermal	Non_thermal	Non_thermal	Non_thermal	Non_thermal	Hot_spring	Non_thermal	Hot_spring	Hot_spring	Non_thermal	Non_thermal	Non_thermal	Hot_spring	Non_thermal	Hot_spring	Non_thermal	Hot_spring	Non_thermal	Non_thermal	Hot_spring	Non_thermal
OG0000000	43	59	55	26	19	31	54	7	25	48	40	10	33	40	34	29	25	29	72	21	21	3	27	31	50	62	29	31	32	33	14	35	34	6	23	3	3	37	47	38	23	39	30	30	32	35	9	22	65
OG0000001	18	46	42	8	14	27	38	1	13	28	16	6	22	19	26	15	42	1	36	3	28	1	18	19	53	53	9	41	15	15	24	13	18	2	12	1	1	50	8	32	16	37	15	35	30	45	4	13	66
OG0000002	19	20	15	14	11	21	21	14	10	24	16	8	25	25	28	20	26	41	31	8	26	4	15	20	22	17	15	27	24	20	15	16	14	3	17	8	8	36	19	15	21	40	16	29	19	28	3	10	34
OG0000003	20	16	20	9	13	19	15	26	22	18	14	5	14	22	9	17	28	3	26	12	12	7	13	16	32	22	14	18	13	12	20	14	19	9	15	10	11	37	25	14	14	30	17	14	12	31	12	23	38
OG0000004	10	60	47	13	34	4	45	3	6	2	37	5	22	52	12	34	34	13	99	0	4	0	26	38	23	72	31	4	21	15	2	16	14	0	18	0	0	25	2	11	2	26	10	5	13	29	8	7	27
OG0000005	24	20	15	2	22	30	15	0	2	24	14	6	34	32	32	28	20	1	31	0	11	0	15	26	39	20	22	24	32	33	0	36	14	0	3	0	0	5	0	23	17	5	24	10	20	37	1	2	39
OG0000006	13	12	10	5	8	20	11	13	12	28	14	15	11	8	10	11	24	1	11	11	24	2	9	8	13	13	6	23	8	7	8	7	10	5	2	2	1	23	9	21	25	24	13	25	20	27	6	11	22
OG0000007	9	20	16	10	11	12	19	4	10	23	11	5	3	6	8	6	12	13	28	4	17	2	9	2	5	19	2	16	4	3	8	3	5	3	16	6	6	17	17	18	9	11	7	17	6	18	7	11	7
OG0000008	9	25	17	7	8	14	18	3	14	19	16	7	6	7	14	6	13	6	18	2	14	4	10	8	8	23	3	8	6	6	7	5	7	4	6	4	3	17	7	10	11	14	14	17	9	15	7	14	12
OG0000009	6	15	10	5	8	18	14	5	7	15	20	5	6	8	14	6	21	4	17	5	10	7	7	6	5	18	5	9	5	5	1	4	4	8	6	0	0	2	22	13	16	9	6	12	15	26	13	7	10
OG0000010	11	13	12	2	4	7	7	1	3	6	1	5	10	49	19	32	27	0	15	0	12	0	6	20	13	17	10	23	6	5	2	8	4	0	0	0	0	13	0	14	4	13	7	12	7	44	0	3	10
OG0000011	5	14	10	13	5	5	9	12	14	6	10	4	11	14	7	11	6	2	19	9	3	5	10	7	15	14	9	4	11	11	11	13	13	5	0	1	1	28	14	7	2	29	9	3	6	5	8	13	16
OG0000012	7	16	6	4	1	6	8	0	8	18	0	2	1	7	4	6	19	0	7	2	30	0	2	4	2	14	0	7	1	0	3	0	1	0	7	0	0	10	2	24	7	3	1	45	5	9	0	8	11
OG0000013	0	6	0	0	0	5	0	1	19	8	0	6	12	25	1	83	22	1	0	5	25	4	0	4	43	17	11	5	32	19	2	4	1	36	3	10	18	4	3	9	4	2	1	17	8	6	1	10	8
OG0000014	12	9	6	7	6	9	7	3	7	13	2	6	8	10	9	9	14	5	4	5	12	3	5	9	7	7	3	11	7	7	6	9	7	4	6	2	1	7	7	11	9	7	10	11	7	15	5	6	5
OG0000015	7	10	9	6	4	6	9	7	8	7	7	5	9	7	9	7	8	6	11	6	7	5	2	13	10	10	5	8	7	8	5	7	4	4	3	4	4	11	8	8	6	13	7	8	6	10	6	8	10
OG0000016	6	13	7	9	8	14	8	3	7	12	9	1	5	6	6	5	12	6	10	6	7	3	9	5	5	11	5	10	5	5	5	5	4	4	10	3	3	8	6	9	9	7	5	9	8	11	4	7	5
OG0000017	13	5	9	1	4	7	6	3	5	5	1	1	12	16	13	15	16	0	13	2	7	2	3	19	25	7	9	9	10	10	2	10	7	2	0	0	0	9	2	8	5	10	7	8	6	18	3	5	22
OG0000018	7	12	8	7	6	8	9	2	6	13	8	6	2	4	6	5	11	6	6	2	10	2	8	5	3	15	3	9	3	2	4	3	6	4	6	3	5	12	6	11	7	10	6	12	12	13	8	7	4
OG0000019	6	6	9	5	6	4	9	4	6	6	5	1	10	12	7	8	5	10	7	4	3	2	8	5	12	7	10	2	11	12	10	14	7	4	0	2	2	25	3	6	3	20	4	3	4	8	6	6	11
OG0000020	7	14	12	6	11	5	9	5	5	7	10	2	4	5	6	7	8	1	13	4	7	2	10	2	5	14	5	7	4	5	6	4	10	4	6	5	7	4	7	5	5	4	6	7	5	7	5	5	6
OG0000021	2	5	4	5	2	4	3	4	12	8	8	4	8	11	5	7	5	2	8	4	11	1	2	8	14	5	9	4	8	9	3	8	2	3	0	2	2	7	5	3	8	8	4	12	4	6	3	12	16
OG0000022	7	6	6	5	3	10	5	1	3	9	6	2	3	3	8	3	7	0	7	3	6	1	1	6	8	5	4	8	3	5	6	2	5	3	6	5	5	6	2	6	7	6	6	8	8	9	2	3	9
OG0000023	6	8	5	3	2	5	6	4	5	6	3	4	4	9	3	11	10	9	8	2	11	1	2	4	5	6	3	7	5	8	3	4	7	2	14	1	1	7	5	4	4	11	3	7	6	11	3	6	6
OG0000024	5	8	12	12	9	4	6	3	9	4	7	4	10	4	6	13	12	0	5	1	2	1	5	4	5	8	5	6	5	4	2	4	1	1	8	6	6	6	10	9	2	10	3	2	11	9	6	8	18
OG0000025	13	16	4	4	12	15	9	1	2	8	6	1	6	9	22	9	6	0	18	1	3	1	8	14	1	12	1	2	3	4	10	4	2	0	3	2	4	2	7	10	2	1	4	7	8	4	5	2	3
OG0000026	11	5	5	1	4	5	4	2	1	5	1	1	9	13	13	11	11	0	10	0	5	3	3	13	20	7	5	6	8	7	1	9	3	5	1	0	0	5	2	6	3	5	9	5	6	14	2	1	13
OG0000027	15	4	4	3	6	7	4	1	2	5	1	1	5	15	10	11	11	0	10	0	3	0	6	13	14	5	2	9	5	6	3	7	4	2	1	0	0	3	4	7	3	6	11	4	7	17	1	2	14
OG0000028	3	5	4	2	7	14	3	1	5	11	5	6	1	2	5	2	10	1	7	1	8	3	7	2	8	5	2	9	1	1	4	1	4	2	3	0	0	8	5	7	8	8	3	8	6	14	2	5	4
OG0000029	7	6	5	4	5	8	6	0	7	7	4	2	2	0	8	1	8	4	11	0	7	1	4	4	3	8	1	9	2	2	1	1	5	1	11	1	1	9	6	10	4	7	6	9	6	7	2	6	4
OG0000030	5	6	7	0	5	10	7	0	0	6	6	3	3	5	4	6	23	2	9	0	5	0	5	8	5	6	7	13	3	3	3	3	2	0	0	0	0	0	1	10	5	0	2	6	7	22	1	0	8
OG0000031	12	6	13	0	3	6	8	1	0	2	3	0	4	6	15	7	14	1	15	0	6	0	5	14	14	5	3	9	3	3	6	2	4	0	0	0	0	5	1	4	2	7	12	6	5	3	1	0	16
OG0000032	8	5	9	3	4	10	8	0	5	12	2	6	3	4	10	2	6	5	9	1	7	0	5	6	5	6	1	8	3	3	1	1	5	0	2	0	0	8	5	4	7	12	7	10	3	11	0	5	9
OG0000033	5	8	3	4	7	2	4	2	2	11	1	0	15	7	11	19	9	0	1	1	9	3	7	11	4	8	10	3	8	6	3	4	2	2	4	0	1	1	7	8	3	3	4	7	5	4	8	1	15
OG0000034	6	6	3	3	3	6	4	2	6	8	5	3	2	3	6	3	4	4	5	3	6	2	4	3	4	7	1	5	2	2	5	2	3	2	3	3	3	10	5	7	7	9	5	8	6	5	3	6	3
OG0000035	4	7	4	5	4	5	6	3	4	6	6	3	3	5	6	6	7	3	5	3	5	2	5	5	4	7	5	6	3	3	5	3	6	3	1	3	3	5	5	6	4	5	5	5	5	6	3	4	4
OG0000036	4	5	5	2	5	5	5	4	5	5	5	4	4	4	5	4	5	3	5	5	5	2	5	4	5	5	3	5	5	4	5	4	4	4	4	3	3	4	4	5	5	4	4	5	5	5	4	5	5
OG0000037	10	10	5	7	6	5	7	3	4	4	7	7	0	2	5	2	1	0	11	2	5	1	7	3	2	10	5	4	0	1	5	1	6	4	3	4	6	2	4	5	5	2	6	5	5	0	3	4	3
OG0000038	4	8	6	5	5	5	4	4	7	6	7	2	3	4	5	4	5	3	6	3	5	2	6	4	4	7	4	5	3	4	5	3	4	4	3	2	2	9	4	4	5	8	4	4	5	5	4	7	3
OG0000039	4	4	4	3	4	4	4	3	4	4	5	2	3	4	7	4	5	0	5	3	5	2	4	4	3	4	3	5	4	4	5	4	5	3	4	2	2	17	4	6	4	13	4	8	5	7	2	4	3
OG0000040	4	6	5	6	4	9	4	1	7	5	4	2	2	2	3	2	6	2	5	2	6	2	6	5	5	6	1	6	2	2	3	2	3	1	6	1	0	4	6	7	5	4	4	7	4	10	4	7	4
OG0000041	3	5	3	3	2	3	3	5	5	4	6	0	6	7	3	5	4	1	7	4	5	0	2	5	7	5	4	4	7	7	3	7	2	3	0	2	2	4	4	3	4	3	4	6	4	4	3	5	6
OG0000042	3	7	6	6	3	5	6	1	4	11	3	4	1	3	2	4	10	0	5	2	8	1	3	2	2	9	2	8	2	1	2	1	1	2	2	1	1	4	5	8	5	5	2	8	9	8	5	4	2
OG0000043	12	12	6	5	5	3	8	0	4	9	8	5	1	4	9	10	6	0	6	0	2	0	7	10	0	12	1	0	2	1	5	1	0	0	12	1	1	4	8	3	1	9	5	2	4	3	2	1	9
OG0000044	2	6	4	2	4	5	5	2	8	6	7	5	3	5	3	4	4	0	5	2	6	3	3	3	3	6	1	4	2	2	2	2	2	3	2	2	2	5	5	7	5	4	4	9	5	6	3	8	4
OG0000045	6	6	9	1	3	6	5	1	7	6	4	5	1	2	3	1	5	1	4	0	7	0	2	4	2	6	1	6	1	1	1	1	3	0	1	0	0	4	0	6	8	3	6	7	9	8	1	6	3
OG0000046	5	4	4	4	4	6	3	5	5	5	4	2	4	4	5	4	3	0	4	3	2	3	4	3	5	5	2	3	6	5	8	6	4	4	4	4	4	18	2	5	4	18	4	3	4	1	4	4	6
OG0000047	10	9	4	6	3	4	5	2	3	5	4	5	0	2	6	2	2	0	10	2	6	1	4	1	2	9	4	5	0	1	3	1	4	2	3	2	3	2	3	6	7	2	4	6	5	1	2	3	2
OG0000048	2	3	3	0	4	6	3	0	3	5	0	0	3	14	10	6	5	1	5	0	3	0	4	7	11	5	3	19	4	8	0	8	1	0	0	0	0	6	2	12	2	5	4	4	3	11	0	2	31
OG0000049	4	9	6	3	2	4	7	2	4	7	8	1	4	5	1	6	6	5	9	3	4	1	4	2	2	6	0	6	4	3	4	3	2	1	7	2	2	4	6	7	2	4	3	5	4	8	1	4	3
OG0000050	8	4	5	5	2	2	5	3	3	5	2	2	1	6	3	2	5	2	8	0	3	1	1	3	2	4	1	13	1	1	4	2	3	1	6	1	1	12	6	7	3	8	2	5	6	8	2	3	5
OG0000051	4	7	5	3	7	3	7	1	2	4	4	1	3	2	4	2	5	47	7	0	4	1	5	3	1	3	6	4	1	1	3	2	0	0	4	8	8	8	5	5	4	6	2	5	3	1	2	1	2
OG0000052	4	5	2	1	3	5	3	3	5	4	5	2	4	4	4	4	4	1	4	5	4	3	3	4	5	5	3	4	4	4	4	4	4	3	2	2	2	6	4	4	4	5	4	4	5	4	3	5	4
OG0000053	4	4	4	4	4	5	3	3	4	5	4	4	5	4	4	4	4	0	4	3	4	2	3	4	4	3	4	4	4	4	4	4	4	3	4	4	4	5	5	4	4	5	4	4	4	4	4	4	4
OG0000054	5	4	3	4	3	6	4	2	4	5	4	1	4	4	3	4	4	3	6	3	5	1	3	3	3	4	2	5	4	4	3	4	3	3	1	2	2	3	7	4	5	3	7	4	5	4	3	4	4
OG0000055	3	14	11	1	3	3	9	1	2	4	7	1	1	6	9	2	8	0	6	0	7	0	3	4	5	17	1	6	1	1	2	2	2	1	0	0	0	6	3	2	3	8	2	6	3	7	1	2	7
OG0000056	4	6	8	1	3	7	6	0	1	6	3	2	3	2	6	5	5	7	4	1	5	0	4	1	9	7	1	5	4	3	1	4	7	0	0	0	0	4	5	4	4	6	3	7	5	5	1	1	10
OG0000057	8	9	7	10	3	2	4	1	2	14	4	2	0	1	1	3	6	1	9	0	4	0	2	0	1	10	0	3	0	0	1	0	2	0	3	0	0	8	0	3	2	6	4	6	2	14	0	4	0
OG0000058	15	7	4	2	13	3	4	1	1	4	6	2	1	2	4	2	3	0	6	1	3	0	11	1	3	7	1	3	1	1	1	0	8	1	0	7	8	1	1	4	3	1	10	3	3	4	1	1	2
OG0000059	1	5	5	7	1	6	5	0	2	7	3	2	1	3	2	2	12	2	7	1	7	0	1	3	2	5	3	7	1	1	2	1	2	0	2	0	0	9	2	3	5	8	1	8	6	9	0	2	3
OG0000060	2	7	4	2	3	3	4	1	4	4	5	2	2	4	3	3	2	0	7	1	7	3	2	4	4	5	2	2	4	3	2	2	3	3	2	4	2	4	1	3	5	7	2	8	3	6	4	4	6
OG0000061	4	3	3	5	2	4	3	4	6	4	4	1	5	2	4	3	6	0	5	3	4	2	2	2	3	3	2	4	4	3	3	4	4	3	3	3	3	11	3	5	4	8	5	4	4	6	3	4	4
OG0000062	1	4	3	2	5	8	3	1	10	7	7	2	1	1	4	2	2	3	6	1	6	1	2	2	2	4	0	7	3	1	3	1	2	1	1	2	2	2	4	9	8	4	3	4	5	2	1	9	2
OG0000063	6	6	8	4	3	6	6	0	7	8	3	3	2	2	8	2	3	1	7	1	7	0	2	1	1	7	0	7	2	2	1	1	5	0	3	0	0	5	6	4	6	6	3	8	3	5	0	6	3
OG0000064	4	6	5	2	4	3	6	4	3	3	4	2	2	3	2	3	2	7	7	4	4	1	2	2	4	6	3	3	3	3	5	3	4	2	6	3	3	3	2	5	4	3	4	4	4	2	2	3	3
OG0000065	6	5	5	2	4	4	4	1	2	5	4	3	2	2	5	2	4	6	8	1	3	1	3	3	4	5	2	6	2	3	4	3	4	3	5	3	3	10	3	5	3	6	6	4	6	4	2	2	4
OG0000066	3	4	3	4	2	4	5	2	3	4	3	2	4	4	2	4	4	2	4	3	8	2	2	2	3	3	1	6	4	3	3	1	3	1	2	2	2	2	3	4	3	9	2	7	4	7	3	2	4
OG0000067	4	5	3	3	2	4	5	4	3	3	3	1	3	3	2	5	8	2	5	2	3	1	3	3	2	5	2	5	3	3	3	2	3	2	6	2	1	5	4	2	3	7	2	4	4	8	2	3	3
OG0000068	2	5	8	1	5	1	7	3	5	2	3	1	4	9	7	6	4	0	7	1	7	0	5	8	2	7	3	2	2	3	5	2	6	1	1	1	1	4	3	2	2	2	2	9	3	6	1	5	5
OG0000069	5	6	6	5	4	5	6	1	4	6	7	3	0	0	2	0	4	0	6	0	6	3	3	0	1	5	1	5	0	0	4	0	0	2	2	2	1	2	7	5	6	4	4	6	5	4	2	4	3
OG0000070	2	4	5	4	1	4	3	1	6	6	13	0	2	3	7	3	5	6	5	1	6	2	0	5	4	4	1	5	2	2	9	2	2	2	6	1	1	9	3	4	4	9	3	3	4	5	2	6	2
OG0000071	3	21	7	11	0	6	13	1	0	8	0	1	2	1	2	1	2	0	0	0	2	0	0	0	1	18	0	1	0	0	0	0	1	0	18	0	0	10	3	9	1	2	3	5	10	5	2	0	1
OG0000072	4	4	3	2	3	4	2	3	2	4	3	2	4	5	4	5	5	0	5	1	4	1	3	5	5	4	4	4	4	4	1	4	6	1	0	2	2	7	2	5	4	4	3	4	4	5	1	2	7
OG0000073	4	3	4	3	3	3	2	3	4	4	3	2	3	3	3	3	3	1	4	3	3	2	3	2	3	4	2	3	3	4	4	4	3	3	1	2	2	3	3	5	5	4	5	5	4	3	2	4	4
OG0000074	1	5	3	1	2	1	3	0	3	4	2	1	5	7	6	6	22	5	13	2	8	0	2	1	0	2	1	7	1	1	10	4	5	0	0	0	0	19	6	2	1	12	1	3	4	11	0	3	4
OG0000075	2	11	13	5	1	0	12	5	3	0	5	0	1	3	3	2	1	0	3	1	3	4	3	2	0	15	0	0	0	1	3	3	1	3	10	3	4	6	0	0	0	7	3	2	1	0	20	3	6
OG0000076	5	4	4	3	2	3	2	4	3	4	2	2	2	3	3	4	4	1	5	2	3	1	2	2	4	4	0	6	2	2	2	3	3	2	6	2	2	4	5	7	2	5	3	3	4	4	5	2	5
OG0000077	2	11	9	1	1	4	9	1	5	9	10	3	1	2	6	2	3	2	6	0	3	0	0	1	1	11	0	2	1	1	4	1	0	0	1	0	0	2	1	5	4	2	11	5	2	1	0	4	3
OG0000078	2	9	4	3	3	3	5	0	3	5	5	3	2	4	9	12	2	0	3	1	4	1	2	9	2	6	0	4	1	2	5	2	0	2	8	0	1	4	7	4	2	2	2	1	4	5	1	3	5
OG0000079	7	6	5	6	3	3	4	1	3	4	3	0	2	2	2	3	4	0	7	2	4	1	2	2	2	6	1	5	2	4	6	2	3	1	3	2	2	2	2	3	3	2	3	4	3	7	1	3	2
OG0000080	1	2	1	2	1	5	3	3	3	5	2	0	3	4	3	6	5	1	4	5	2	1	0	7	6	2	4	3	3	5	4	4	4	2	4	2	1	5	5	4	1	9	3	4	4	8	2	2	6
OG0000081	2	2	2	2	2	4	2	2	4	6	2	4	2	2	2	3	6	0	2	2	6	1	2	3	3	2	2	4	2	2	2	2	2	2	2	2	2	2	2	6	6	2	2	6	6	6	2	4	2
OG0000082	2	3	0	1	0	5	0	0	0	7	0	2	1	2	4	5	14	0	4	1	6	2	0	0	3	3	0	4	3	0	0	0	2	7	3	0	0	3	2	6	4	3	0	4	7	2	6	0	13
OG0000083	4	1	1	3	1	4	1	0	2	5	3	1	1	4	3	5	2	13	7	1	5	1	2	1	6	1	1	6	1	1	0	1	4	1	5	0	1	8	1	2	4	6	2	5	3	14	1	2	7
OG0000084	1	6	0	2	1	4	0	1	6	7	7	1	3	3	5	5	1	0	10	3	3	3	3	1	3	7	2	3	2	4	5	2	2	3	5	3	2	2	3	4	6	4	5	5	4	2	2	6	2
OG0000085	2	5	3	4	1	4	4	1	5	10	1	3	0	2	1	3	7	0	3	1	6	1	2	1	1	7	1	6	1	0	1	0	0	1	2	1	1	4	2	8	5	4	1	7	9	6	4	3	1
OG0000086	2	3	2	0	1	3	2	4	3	2	4	1	5	6	1	5	3	0	4	4	5	1	1	9	4	3	6	1	5	5	2	5	3	2	0	1	1	2	3	2	5	2	3	5	2	3	2	3	3
OG0000087	4	7	5	2	8	3	5	0	2	3	9	2	3	0	3	0	3	0	9	1	3	1	8	0	1	7	1	3	1	1	2	1	6	3	0	4	4	2	5	4	3	2	3	3	3	3	5	2	2
OG0000088	2	6	5	5	1	6	7	1	2	7	2	4	0	1	3	2	5	1	2	0	6	0	0	2	1	4	0	6	0	0	0	0	0	0	6	0	0	9	3	2	4	6	2	9	3	8	2	1	4
OG0000089	3	3	3	3	3	3	3	3	3	4	3	1	3	3	3	3	3	2	4	2	3	2	3	3	3	3	3	4	3	3	3	2	3	3	4	2	2	5	4	3	3	6	3	3	3	3	3	3	3
OG0000090	2	3	3	2	2	6	3	1	3	3	3	2	5	4	4	3	2	4	4	2	6	0	2	3	3	3	1	3	2	2	1	3	2	2	1	1	2	4	1	3	4	6	2	5	2	5	2	3	3
OG0000091	2	6	4	3	5	4	4	2	4	4	4	1	3	4	2	3	4	1	5	2	3	2	4	3	3	6	1	3	3	3	3	3	3	2	2	3	3	2	2	5	3	2	3	3	5	6	2	4	2
OG0000092	5	5	4	3	4	3	3	3	4	4	5	0	3	3	3	3	3	3	4	3	3	1	4	3	3	5	2	3	3	3	3	3	3	2	1	2	2	2	2	3	3	2	5	3	3	3	2	4	3
OG0000093	2	6	8	3	4	5	7	0	4	3	2	3	1	5	2	2	11	16	4	1	5	0	5	3	3	6	2	8	2	0	3	1	2	0	2	1	1	1	0	4	4	1	3	3	3	4	0	3	4
OG0000094	5	4	4	1	3	6	2	1	4	4	3	1	1	1	2	1	6	0	2	1	5	0	2	2	2	3	1	5	1	1	1	1	2	0	0	0	0	3	0	4	5	2	5	7	6	6	1	4	2
OG0000095	2	5	3	2	2	3	3	4	4	3	6	2	4	3	3	2	4	0	5	3	4	3	1	4	3	5	3	3	3	4	3	3	2	3	0	2	2	3	4	3	3	3	3	4	3	4	3	4	3
OG0000096	1	7	3	4	2	4	2	2	6	7	6	3	2	3	2	3	6	0	2	2	1	1	2	2	1	7	1	1	2	1	3	2	2	2	1	3	3	11	2	1	6	11	3	3	5	4	2	6	2
OG0000097	4	2	2	4	2	4	2	3	3	7	3	1	2	3	2	3	4	3	2	2	5	0	1	4	3	2	1	4	3	4	3	1	3	1	3	0	1	3	3	4	4	3	3	5	4	4	2	3	3
OG0000098	3	2	1	2	2	2	2	2	2	4	3	3	3	3	3	3	3	3	4	2	4	1	2	2	2	2	3	5	3	2	3	2	3	2	2	2	2	3	4	5	3	4	2	8	3	3	3	2	3
OG0000099	4	5	5	4	3	3	5	0	3	4	4	2	3	3	3	3	3	2	3	3	4	2	4	1	3	5	2	3	3	4	3	3	6	2	1	1	1	2	3	3	4	2	3	4	3	3	2	3	3
OG0000100	4	5	5	3	3	3	4	1	3	4	4	1	3	3	3	3	3	3	4	3	3	2	3	1	3	5	1	3	3	3	3	3	5	2	1	1	1	2	3	3	4	2	3	4	3	3	2	3	3
OG0000101	5	2	2	2	2	3	2	3	2	3	2	1	2	2	4	2	3	1	4	2	5	0	2	3	3	3	2	4	2	2	3	2	3	2	4	3	2	3	5	5	2	3	3	4	2	5	2	2	3
OG0000102	4	4	4	4	4	4	4	1	3	3	4	3	3	3	4	3	4	0	5	3	3	1	4	3	2	4	2	4	3	2	2	4	3	1	1	2	2	3	3	4	3	3	4	3	4	3	1	3	2
OG0000103	3	2	1	2	3	4	3	1	2	4	2	5	1	1	3	2	7	0	1	0	9	2	0	3	1	1	1	5	1	1	1	1	1	3	2	1	1	4	3	1	8	4	4	8	0	6	1	2	4
OG0000104	1	4	5	5	2	4	3	1	5	6	4	1	1	2	2	3	5	2	2	1	3	1	1	0	2	4	1	4	1	1	2	1	1	1	1	2	2	4	4	3	6	3	2	5	3	4	1	5	2
OG0000105	2	4	1	0	4	2	3	3	5	3	0	0	2	2	6	3	2	2	3	3	5	3	2	1	2	4	2	5	3	1	0	3	5	2	0	2	3	5	8	5	1	10	1	7	3	1	1	3	4
OG0000106	6	6	4	2	3	4	6	0	4	3	4	1	2	1	6	2	2	3	5	1	5	0	3	2	2	7	1	4	3	3	2	2	3	0	5	0	0	1	4	4	3	3	3	5	5	3	1	2	2
OG0000107	1	5	5	2	5	4	7	2	3	3	3	2	1	4	2	4	4	0	5	1	5	0	3	1	2	5	1	6	1	2	4	1	2	2	1	0	0	2	5	2	3	2	1	4	3	5	4	2	1
OG0000108	1	0	0	2	2	7	0	0	1	3	0	1	6	7	6	9	3	1	1	11	6	1	2	5	5	0	1	2	2	2	0	2	0	0	0	0	0	3	1	5	2	1	0	3	5	4	4	2	9
OG0000109	2	4	2	3	4	3	2	1	4	4	4	2	4	4	4	3	3	0	3	3	3	2	1	1	2	4	2	3	4	3	4	3	3	2	1	2	2	2	3	5	3	3	4	3	4	3	2	4	3
OG0000110	2	6	1	4	3	7	3	0	0	9	4	3	4	0	6	2	4	0	7	0	3	0	2	2	1	8	1	4	5	4	5	3	1	0	9	0	1	0	3	2	1	1	0	1	8	5	0	0	8
OG0000111	3	3	3	3	3	3	3	2	3	3	3	1	3	3	3	3	3	4	3	2	3	0	4	4	3	3	4	3	3	3	3	3	3	2	2	2	2	4	2	3	3	4	3	3	3	3	2	3	3
OG0000112	0	7	7	1	3	0	5	0	4	6	0	3	0	4	2	3	5	0	5	0	10	0	4	0	0	5	0	1	0	0	1	0	0	0	4	0	0	2	2	5	5	0	0	24	0	3	0	5	2
OG0000113	2	8	8	5	6	2	10	1	0	6	4	3	2	2	1	2	2	0	9	0	3	0	3	4	1	7	0	2	1	4	0	2	3	0	4	1	1	0	6	2	3	0	0	2	4	0	3	0	4
OG0000114	2	4	4	4	2	4	4	2	2	4	4	3	3	2	2	1	1	2	3	0	3	1	3	2	1	5	0	3	1	2	2	2	3	1	4	3	3	2	3	5	3	2	1	5	2	3	2	2	3
OG0000115	2	5	2	3	2	3	1	2	5	6	5	1	2	2	2	2	2	0	2	2	2	2	2	2	2	6	2	2	2	2	7	1	2	2	2	2	2	0	2	2	5	0	5	3	2	3	2	5	2
OG0000116	3	4	3	2	1	2	1	0	1	4	2	2	13	7	4	6	3	0	1	2	2	0	2	4	1	4	2	5	7	5	1	4	0	0	2	1	2	3	6	5	1	5	1	0	3	3	3	0	4
OG0000117	1	16	8	11	0	3	12	0	0	9	0	5	0	0	0	0	0	0	0	0	2	0	0	0	1	17	0	1	0	0	0	0	2	0	0	0	0	9	3	1	1	3	0	4	9	4	0	0	1
OG0000118	2	3	2	2	2	1	4	1	3	7	3	1	1	2	3	3	5	3	5	0	3	1	2	2	1	3	0	3	3	2	1	2	2	1	6	1	1	9	4	2	2	4	2	3	1	6	2	3	1
OG0000119	4	6	5	4	4	3	6	2	1	2	4	1	4	4	5	5	3	1	5	2	2	1	3	5	2	5	5	3	1	2	5	3	5	1	3	1	1	6	2	2	2	4	4	2	2	2	2	1	2
OG0000120	4	4	4	5	1	4	4	2	6	5	3	3	3	3	3	4	2	0	3	1	4	2	1	1	2	5	0	4	3	3	4	3	1	2	4	0	0	0	4	4	3	0	2	5	5	5	1	5	1
OG0000121	2	3	2	2	2	6	2	1	1	3	4	0	1	2	4	1	4	3	8	1	3	1	2	2	2	3	1	4	1	1	1	1	2	2	1	1	1	4	2	2	4	4	2	3	4	6	2	1	4
OG0000122	2	10	3	3	0	4	2	0	2	6	0	0	6	2	8	1	8	3	5	0	4	1	0	3	0	8	0	5	2	0	0	1	0	0	9	2	2	0	11	4	1	5	0	2	8	3	8	0	11
OG0000123	1	5	3	0	0	4	4	0	1	2	0	1	4	5	6	2	11	0	7	0	8	0	1	4	0	4	1	3	1	1	2	0	0	0	0	0	0	1	2	5	0	0	1	5	5	2	1	1	3
OG0000124	5	4	4	4	3	5	4	1	2	4	3	4	2	2	2	2	3	1	4	3	3	0	2	3	2	4	0	2	2	1	2	1	1	1	1	1	1	2	2	3	4	3	3	5	4	3	1	2	3
OG0000125	2	3	3	1	3	5	3	0	1	3	6	4	2	4	4	3	2	5	5	2	4	1	4	2	1	3	0	3	2	2	1	2	2	0	3	0	1	2	3	2	4	1	1	5	1	3	4	1	2
OG0000126	3	4	4	2	2	4	4	2	3	3	2	1	3	4	4	2	3	2	5	2	2	2	2	3	2	6	2	3	3	3	2	3	2	2	4	2	2	1	5	3	2	2	2	2	2	2	2	3	2
OG0000127	2	4	2	2	2	2	3	2	1	2	3	0	2	4	2	3	5	0	5	3	1	2	1	1	3	4	2	5	2	2	2	2	2	3	3	3	3	4	4	5	1	4	3	1	3	3	3	1	3
OG0000128	3	5	2	0	2	2	3	1	2	4	3	3	2	2	2	2	3	0	4	2	4	1	2	2	2	3	2	3	2	2	1	1	2	2	4	2	2	2	3	4	3	2	2	4	2	3	2	2	2
OG0000129	6	3	3	2	2	3	3	2	4	3	4	2	2	3	3	3	3	0	5	1	3	2	1	1	2	3	2	3	2	2	3	2	4	2	0	2	2	8	3	2	3	8	6	3	2	2	2	4	2
OG0000130	4	5	4	3	3	4	5	2	1	2	3	1	3	4	5	4	4	1	4	2	2	0	3	3	2	4	3	3	2	2	4	2	4	1	2	1	1	5	2	3	2	3	4	2	3	4	2	1	2
OG0000131	3	3	3	4	3	2	2	2	3	3	4	0	2	3	2	3	2	4	3	2	2	1	2	2	2	4	3	2	2	3	4	2	2	2	1	2	2	3	2	5	2	3	3	3	2	2	2	3	3
OG0000132	3	2	2	0	3	2	3	1	4	2	1	0	4	4	5	4	5	0	5	1	3	0	3	2	4	3	2	4	4	3	2	3	3	1	0	0	0	3	0	4	1	2	3	5	2	8	1	3	5
OG0000133	4	1	2	3	4	2	0	3	2	4	4	3	2	2	3	1	3	0	6	1	4	2	0	2	1	3	2	3	2	1	1	2	2	3	0	1	1	3	2	4	4	0	4	4	4	4	3	2	1
OG0000134	4	3	2	2	3	6	2	0	4	3	5	2	0	2	1	1	6	0	5	2	3	2	3	1	3	3	0	3	0	0	0	0	2	1	3	0	0	7	2	2	2	8	2	3	3	6	1	4	5
OG0000135	2	0	1	2	1	4	3	1	0	5	1	1	6	0	7	4	7	2	2	2	7	0	2	5	0	1	3	4	0	1	1	3	2	0	7	0	0	3	5	1	0	4	1	4	8	3	1	0	7
OG0000136	3	3	3	5	2	3	2	1	4	2	5	1	2	4	0	3	5	3	4	2	2	1	2	1	3	6	2	3	2	2	5	1	3	1	3	1	2	2	2	2	2	4	2	2	4	5	0	4	3
OG0000137	2	2	1	4	2	2	2	1	3	1	2	4	3	4	2	3	1	1	3	2	4	1	3	3	2	4	1	3	3	2	2	3	1	1	1	1	1	2	3	3	6	5	4	4	3	2	0	3	2
OG0000138	4	3	3	2	3	4	2	1	2	2	2	0	2	2	3	2	3	2	3	2	2	0	2	2	1	3	2	3	2	2	5	2	2	1	3	1	1	3	1	7	1	2	4	3	5	3	2	2	2
OG0000139	2	3	1	4	0	1	2	1	1	10	1	1	5	3	0	0	3	1	2	3	7	0	0	0	0	3	0	4	2	1	0	0	4	0	0	0	0	0	4	5	2	3	1	5	4	6	6	1	2
OG0000140	2	2	2	2	2	3	2	3	2	3	2	1	2	2	3	2	2	3	2	2	3	3	2	3	1	2	2	3	2	1	2	2	2	3	3	3	2	3	3	3	3	3	2	3	3	2	3	2	3
OG0000141	2	9	6	1	4	3	5	0	1	1	0	1	9	2	8	4	4	0	3	0	0	0	2	0	2	9	0	3	3	8	1	3	1	0	15	0	0	0	6	1	1	1	1	0	2	1	5	0	12
OG0000142	2	3	2	3	3	3	1	2	3	3	3	2	2	3	3	3	3	1	3	2	3	2	2	2	2	3	2	3	2	2	3	2	3	2	2	1	1	2	3	4	3	2	3	3	3	3	2	3	2
OG0000143	1	16	8	13	1	3	11	1	0	10	0	2	1	0	0	0	2	1	0	0	0	0	0	0	0	18	0	0	0	0	0	0	2	0	4	0	0	10	3	0	0	2	2	2	9	3	0	0	0
OG0000144	2	3	3	4	2	2	4	2	2	2	5	1	2	2	2	2	3	1	5	2	3	0	2	2	2	2	3	2	2	3	4	2	3	2	2	1	1	2	2	2	2	2	2	2	3	2	2	3	2
OG0000145	0	2	2	2	0	3	6	3	1	8	2	0	4	3	4	1	1	0	4	0	3	1	2	1	2	5	0	3	2	1	1	1	4	0	4	0	1	0	2	5	1	1	3	6	10	1	10	2	4
OG0000146	3	4	2	2	2	2	3	1	2	5	2	2	1	3	3	3	2	1	3	1	4	1	2	2	3	5	0	3	2	2	2	2	2	1	2	1	1	2	4	3	4	2	3	4	4	2	1	2	2
OG0000147	2	5	0	2	2	2	1	2	4	5	4	0	2	2	2	2	2	0	3	2	2	1	2	2	1	5	2	2	2	2	5	2	2	2	2	2	2	2	3	3	4	2	4	2	3	2	2	4	3
OG0000148	0	2	2	3	3	1	2	1	1	4	1	2	2	4	3	2	3	3	3	3	4	1	6	4	2	2	1	4	3	4	5	3	3	1	0	2	2	5	2	1	3	5	2	3	1	5	1	1	6
OG0000149	3	4	2	1	2	2	3	1	2	2	2	1	2	2	4	3	2	2	3	2	3	0	1	1	3	4	2	4	2	2	1	2	4	1	2	4	3	3	3	3	2	1	1	4	4	3	1	2	4
OG0000150	3	2	2	2	3	3	2	2	2	3	2	1	2	2	3	2	3	1	2	2	2	3	3	2	2	1	2	3	2	2	3	2	3	3	2	3	3	2	3	3	2	2	2	2	3	2	3	2	2
OG0000151	2	4	4	2	2	3	4	2	3	3	4	0	2	2	2	1	1	1	3	3	3	0	2	2	1	4	2	3	2	2	2	2	3	2	2	2	2	2	2	2	3	2	2	3	2	3	2	3	2
OG0000152	3	4	3	3	3	3	4	2	2	3	3	0	2	2	2	2	3	3	3	2	2	0	3	2	3	3	3	2	2	2	2	2	3	1	3	2	2	2	2	2	2	2	3	2	3	3	2	2	3
OG0000153	1	1	2	1	0	7	2	0	2	11	2	2	0	0	4	0	6	4	4	0	5	0	1	0	0	1	0	6	0	1	0	1	1	0	1	0	0	1	7	6	3	2	1	6	8	7	0	2	1
OG0000154	4	2	2	1	2	3	1	2	2	3	2	1	3	3	4	3	2	4	2	2	2	1	2	3	3	2	2	3	3	1	2	3	2	2	1	2	2	2	2	2	3	2	4	2	2	2	2	2	3
OG0000155	2	2	2	2	2	2	2	2	2	2	2	1	2	2	2	2	2	0	2	2	2	2	2	2	3	2	1	2	2	2	3	2	2	2	3	2	2	14	2	2	2	9	2	2	2	2	1	2	3
OG0000156	1	2	3	1	1	10	2	0	3	2	3	1	1	1	2	1	4	0	4	1	7	0	1	1	2	2	1	3	1	1	0	1	1	0	1	0	0	0	5	1	5	0	1	6	3	4	2	3	2
OG0000157	2	3	3	1	3	2	3	2	3	3	3	3	2	2	2	3	3	3	2	2	1	0	1	2	2	2	2	2	2	2	2	2	2	2	1	2	2	2	2	3	3	2	3	3	2	2	2	3	2
OG0000158	2	3	2	2	4	3	2	1	2	4	5	1	1	2	2	3	3	1	5	2	3	0	3	2	1	3	1	4	1	1	2	1	2	1	2	1	1	3	2	3	3	3	3	3	2	5	2	2	1
OG0000159	3	5	3	2	5	5	3	1	2	4	5	0	1	2	1	2	5	3	4	1	3	1	5	2	2	5	1	4	1	1	2	2	3	1	2	0	2	0	6	2	0	0	3	2	5	6	1	2	4
OG0000160	3	2	2	2	2	4	0	1	3	3	2	2	2	2	4	2	2	1	2	2	3	1	2	3	2	2	2	4	2	1	3	2	3	2	2	1	1	3	2	2	2	3	3	3	2	4	1	3	2
OG0000161	3	3	3	3	4	3	3	2	4	4	3	1	1	2	2	1	3	5	5	1	2	0	4	0	1	3	1	3	1	1	1	0	3	1	3	1	2	1	3	2	3	1	2	2	3	3	2	3	2
OG0000162	2	1	1	2	2	3	1	1	3	3	1	1	3	4	3	4	3	2	3	2	4	0	1	3	3	1	2	3	3	2	2	3	2	2	2	1	1	3	2	2	3	2	2	4	2	2	2	3	4
OG0000163	2	4	2	1	0	2	2	0	2	1	1	2	2	4	7	3	4	0	16	1	4	0	2	0	2	5	2	7	1	2	4	1	4	0	0	0	0	6	3	6	1	7	1	4	5	5	1	2	5
OG0000164	2	3	1	2	1	3	2	1	2	4	2	2	1	3	2	3	2	0	2	3	3	1	1	2	2	3	1	2	1	1	3	1	3	2	2	2	2	2	1	5	2	2	2	3	3	3	2	2	2
OG0000165	1	4	2	2	2	5	2	2	2	3	3	3	2	2	0	2	5	3	2	3	3	0	2	1	2	4	1	3	2	2	4	1	2	1	1	2	2	3	3	2	2	5	2	4	2	4	3	2	3
OG0000166	3	2	3	0	4	3	3	0	0	2	2	1	3	2	5	3	3	4	3	0	1	0	4	5	6	2	2	3	2	4	3	3	4	0	0	0	0	0	0	3	3	0	2	1	4	3	1	0	5
OG0000167	4	1	2	0	2	1	2	0	0	0	0	1	6	14	6	8	3	0	6	1	0	0	1	5	8	2	7	2	6	7	2	7	6	0	0	0	0	1	3	0	1	1	5	0	0	4	2	0	14
OG0000168	2	3	3	2	2	3	4	2	2	3	3	1	1	2	2	2	2	1	3	2	2	0	2	2	2	3	2	3	2	2	3	1	2	2	2	2	2	3	2	3	3	3	2	2	2	2	2	2	2
OG0000169	1	2	10	1	2	4	2	2	5	2	2	1	2	4	6	2	5	0	8	1	2	0	2	4	2	6	1	5	2	1	2	2	1	1	7	1	1	1	2	2	2	0	1	2	2	2	1	5	1
OG0000170	3	3	2	1	4	3	2	0	4	3	2	2	1	1	4	2	2	2	4	1	2	0	4	0	5	3	0	2	1	1	0	1	2	1	2	0	0	2	5	5	3	4	3	3	3	3	0	4	5
OG0000171	6	5	3	4	3	2	4	2	3	3	4	3	3	2	3	2	1	0	5	1	1	0	3	3	2	5	0	3	3	3	1	2	0	1	4	0	1	1	5	2	2	1	5	2	1	1	3	3	2
OG0000172	3	2	1	3	2	2	1	1	3	2	2	0	3	3	2	3	2	4	2	2	2	1	1	2	2	2	2	2	3	3	2	3	2	1	1	2	2	7	1	3	2	5	2	3	3	2	1	4	2
OG0000173	2	3	3	1	2	4	2	0	2	4	3	3	1	2	2	1	3	0	3	2	3	1	2	2	2	3	1	4	1	1	3	1	1	1	1	0	0	0	3	4	3	0	2	4	5	4	1	2	4
OG0000174	3	3	2	1	2	2	3	2	3	2	2	1	2	2	2	2	2	3	3	2	2	2	1	2	2	3	2	2	3	2	3	2	3	2	2	1	1	4	2	2	2	3	2	2	2	2	2	3	3
OG0000175	1	5	3	4	1	2	6	1	4	4	4	1	2	3	1	3	2	1	1	3	1	1	1	3	2	4	2	2	2	2	2	3	3	1	0	2	1	2	1	2	2	2	1	3	2	3	1	3	4
OG0000176	3	1	1	4	2	2	2	2	2	2	3	1	2	2	1	2	1	0	2	1	4	0	1	1	3	2	2	5	2	3	2	4	3	1	2	1	1	1	1	4	2	2	2	6	3	1	2	2	2
OG0000177	2	3	2	3	2	3	2	1	3	3	3	0	2	2	2	4	2	0	2	1	2	0	2	2	2	2	2	3	2	2	3	1	2	2	1	1	1	4	2	3	3	4	3	3	3	2	2	3	2
OG0000178	1	3	1	4	2	2	1	1	3	2	2	2	1	2	2	2	4	0	4	2	3	2	1	3	1	3	1	2	1	1	2	1	3	2	1	2	2	6	3	4	2	5	2	3	2	4	2	3	1
OG0000179	3	2	2	1	2	2	2	2	2	3	2	2	2	2	2	2	2	0	2	2	2	1	2	1	3	2	2	2	2	1	4	2	2	2	3	2	2	2	3	2	2	4	2	2	2	2	2	2	3
OG0000180	2	2	1	3	2	2	2	2	3	2	2	2	2	2	2	2	2	0	2	2	2	2	2	1	2	2	2	2	2	2	3	2	2	2	2	3	3	4	2	2	2	3	2	2	2	2	2	3	2
OG0000181	2	3	3	2	3	2	1	2	2	2	2	1	1	2	2	2	2	3	4	1	3	2	2	2	1	3	1	3	1	1	2	2	1	2	2	2	2	2	2	3	2	2	3	3	2	2	2	2	1
OG0000182	1	2	2	1	2	4	1	1	3	3	3	4	1	1	2	1	6	1	4	1	3	0	2	1	1	2	2	6	1	1	3	1	1	1	2	1	1	1	2	5	3	1	1	3	3	4	1	2	1
OG0000183	2	2	1	4	4	0	3	5	2	4	5	1	7	3	2	3	1	0	3	9	1	0	10	5	1	2	4	0	3	0	2	0	3	1	2	1	0	0	6	0	0	0	0	1	0	1	6	0	7
OG0000184	2	2	2	3	3	3	3	2	0	2	2	1	1	1	2	1	2	0	2	1	2	1	2	0	0	3	3	2	1	3	0	1	2	2	3	2	2	0	2	3	3	0	3	2	2	2	4	1	3
OG0000185	2	1	2	2	2	2	2	2	3	4	2	0	2	2	2	1	2	1	2	2	3	1	2	2	2	2	2	3	2	2	2	2	2	1	2	2	2	2	2	2	3	2	2	3	2	2	2	3	2
OG0000186	2	2	2	2	2	2	2	2	2	2	2	1	3	3	2	3	2	0	2	2	2	1	1	1	2	2	3	3	5	3	2	3	2	2	4	2	2	4	2	2	2	5	2	2	2	2	2	2	2
OG0000187	2	2	3	1	1	2	3	1	3	4	2	1	1	2	2	2	2	0	2	2	2	3	2	2	4	2	0	3	2	2	3	3	2	2	2	2	2	1	3	4	1	1	2	2	4	1	2	2	3
OG0000188	2	2	2	2	3	2	2	2	2	3	3	2	2	2	2	2	2	1	2	2	3	1	2	2	2	2	3	2	2	2	3	2	2	2	2	2	2	2	3	2	2	2	2	2	2	2	2	2	2
OG0000189	4	3	4	3	3	4	3	2	3	2	4	0	4	5	4	3	3	1	5	0	2	0	3	2	2	3	1	2	4	4	0	4	0	0	1	0	1	2	5	3	1	2	2	2	1	2	2	3	2
OG0000190	1	1	1	1	1	2	1	3	1	3	2	1	0	0	1	0	2	11	1	4	2	0	1	0	0	1	0	4	0	0	1	0	1	1	8	4	4	2	5	3	2	2	2	2	4	2	1	1	0
OG0000191	6	4	2	7	3	4	3	2	1	0	3	0	4	2	3	22	5	1	6	1	1	0	1	0	0	2	2	3	1	0	0	0	2	0	5	0	0	5	6	2	3	2	2	9	4	2	1	5	2
OG0000192	2	2	4	1	2	3	2	2	3	2	2	1	2	3	3	2	3	0	3	1	2	1	2	4	2	4	2	3	2	2	2	3	2	1	3	3	3	1	1	2	2	0	2	2	2	2	2	3	2
OG0000193	2	3	3	2	5	3	3	2	1	4	2	1	1	1	2	1	1	0	3	2	3	1	2	1	2	2	1	4	0	0	1	0	2	1	3	0	0	1	2	5	2	1	1	3	2	3	1	1	2
OG0000194	2	2	1	1	2	3	2	1	2	3	2	2	1	2	3	3	3	0	2	2	3	1	3	2	2	3	2	3	1	1	1	1	3	1	2	1	1	2	2	3	3	2	2	3	3	3	1	2	2
OG0000195	2	1	0	2	2	1	1	1	3	2	2	1	2	3	3	2	2	1	1	1	2	1	2	2	2	2	1	2	2	2	3	1	3	1	1	2	2	4	1	3	2	5	2	3	3	2	1	2	3
OG0000196	1	3	2	2	2	3	2	2	4	2	2	0	1	1	2	1	4	4	4	1	2	1	2	1	2	3	2	3	1	1	1	1	2	2	3	2	2	2	2	4	2	1	1	3	2	2	2	4	2
OG0000197	3	3	3	2	3	3	3	0	0	3	3	0	3	3	3	3	3	0	3	0	2	0	4	2	4	4	2	3	4	3	0	3	3	0	0	0	0	0	0	3	2	0	3	3	3	3	0	0	4
OG0000198	1	2	2	2	2	4	1	1	2	3	3	3	1	1	2	1	3	1	4	1	3	0	2	1	1	2	1	3	1	1	3	1	1	1	2	1	1	1	2	5	3	1	1	3	3	4	1	2	1
OG0000199	4	2	2	3	2	3	1	2	2	2	3	2	0	0	3	0	0	0	2	2	3	1	2	1	0	3	2	3	0	0	3	0	2	2	2	2	2	1	2	3	3	2	4	3	3	0	1	2	1
OG0000200	3	3	3	1	2	1	3	0	3	4	5	1	2	2	1	3	3	4	7	1	4	0	1	3	1	3	0	1	2	3	2	2	0	0	3	1	1	2	1	2	3	3	1	4	1	3	0	1	2
OG0000201	3	3	2	2	2	3	2	1	2	4	2	1	2	2	2	2	3	0	2	3	2	1	1	2	2	3	1	2	2	1	2	2	1	1	2	1	1	5	1	3	3	5	2	3	3	4	1	1	1
OG0000202	1	2	2	1	2	4	1	1	3	3	3	4	1	1	2	1	3	2	3	1	3	1	2	1	1	2	1	3	0	1	3	0	1	1	1	1	1	1	2	5	3	1	1	3	3	4	1	2	1
OG0000203	2	3	2	2	2	2	2	1	2	3	2	0	2	3	2	3	3	1	2	2	2	2	1	2	1	3	1	2	2	2	2	2	2	2	1	1	1	1	2	3	2	1	2	2	3	3	2	2	3
OG0000204	3	3	3	2	2	3	3	1	2	3	3	3	2	3	2	3	3	0	2	2	4	0	2	2	1	3	1	2	2	2	1	2	2	0	1	1	1	3	1	3	3	3	3	2	3	3	0	2	3
OG0000205	2	5	5	2	2	7	5	0	1	5	3	2	1	0	2	0	4	2	4	1	3	1	2	0	1	5	0	2	2	1	2	2	2	1	1	0	0	2	1	3	3	2	0	3	3	3	0	1	1
OG0000206	1	1	3	3	1	3	4	0	2	4	2	2	0	0	2	1	1	2	4	1	4	1	0	2	0	2	0	3	0	1	0	0	0	1	3	1	1	0	3	4	4	2	1	7	4	5	0	1	4
OG0000207	1	1	1	0	1	2	1	1	0	2	2	1	3	5	2	4	2	17	4	6	2	1	1	2	5	1	5	1	3	2	0	1	0	2	0	3	4	1	2	3	1	0	1	2	1	2	2	0	6
OG0000208	1	3	3	6	3	3	2	0	3	3	4	2	2	1	1	1	2	1	2	2	2	1	2	1	1	3	1	1	2	2	4	3	2	0	1	2	1	1	0	2	3	1	1	3	2	2	0	3	2
OG0000209	3	2	2	2	2	2	2	1	2	3	2	3	1	1	2	0	0	0	2	1	3	2	1	2	1	2	1	2	1	1	1	1	2	3	1	2	2	3	3	3	3	3	3	3	2	0	3	2	1
OG0000210	3	2	2	2	2	2	2	1	2	3	2	1	1	1	2	0	0	0	2	1	3	2	2	2	1	2	1	2	1	1	1	1	2	3	1	2	2	3	3	3	3	3	3	3	2	0	3	2	1
OG0000211	2	2	3	1	2	2	3	1	2	4	1	1	2	2	2	2	4	0	2	1	3	0	2	2	1	3	2	3	2	1	2	2	1	1	2	1	1	4	2	4	2	5	2	3	3	3	1	2	2
OG0000212	4	2	2	2	2	1	2	3	2	2	2	1	1	1	2	2	2	0	3	2	3	2	2	1	1	2	3	2	2	1	2	1	2	2	1	1	1	4	3	3	2	4	3	3	3	2	3	2	2
OG0000213	2	2	2	2	2	2	2	1	2	2	2	2	2	2	2	2	2	1	2	2	2	0	1	1	3	2	2	2	2	2	2	3	2	2	2	2	2	2	2	3	2	2	2	2	3	2	2	2	3
OG0000214	2	2	2	1	1	3	2	1	1	2	2	0	1	1	3	1	3	1	2	1	3	1	1	0	3	2	2	3	1	1	3	1	3	1	1	1	1	1	1	2	3	1	2	3	3	3	1	1	3
OG0000215	1	4	2	3	1	1	1	1	1	3	2	1	0	1	1	1	1	2	2	2	3	2	1	0	1	4	1	4	0	0	1	0	2	1	2	2	1	4	2	1	1	8	1	3	1	4	2	1	2
OG0000216	2	2	2	2	2	2	2	2	2	2	2	0	2	2	1	2	2	0	2	2	2	1	2	2	2	2	1	2	2	3	2	2	2	2	2	1	2	2	2	2	2	3	2	2	2	2	2	2	2
OG0000217	2	2	1	1	1	4	1	2	2	2	3	5	1	3	2	2	2	0	2	2	3	2	1	2	2	2	1	2	1	1	1	1	2	1	2	2	2	2	1	3	3	2	2	3	2	3	2	2	2
OG0000218	3	2	2	1	3	3	2	1	1	3	2	1	3	3	3	3	3	0	2	2	3	0	1	3	2	3	3	3	2	1	2	0	3	0	0	0	0	1	0	3	3	1	3	3	3	3	0	1	2
OG0000219	2	2	2	3	3	2	1	1	3	3	3	2	1	1	2	1	2	1	3	1	2	1	2	1	1	4	2	2	1	1	2	1	4	3	2	1	1	2	3	2	2	2	2	2	2	3	2	3	2
OG0000220	2	2	2	4	4	3	2	1	1	2	2	1	2	2	2	2	2	1	2	2	1	1	2	1	2	2	1	2	2	1	1	2	4	2	5	5	5	0	2	1	1	0	2	1	1	2	2	1	2
OG0000221	2	2	2	2	2	1	2	1	3	2	3	1	2	2	3	2	1	4	3	2	2	1	2	2	3	2	1	1	2	2	2	2	2	1	2	1	1	2	2	2	2	3	2	3	2	1	1	3	2
OG0000222	2	2	2	0	3	2	2	1	2	2	2	2	3	3	2	3	2	0	3	1	2	1	3	3	4	2	3	2	3	3	2	4	2	1	0	1	1	1	2	3	2	1	2	3	2	2	1	2	2
OG0000223	3	2	3	2	3	2	2	2	2	3	2	1	2	2	2	2	2	2	3	2	2	0	1	2	2	3	2	2	2	2	2	2	2	1	2	1	1	2	3	2	2	2	2	2	2	2	2	2	2
OG0000224	2	1	3	1	2	3	2	1	2	2	2	2	2	3	3	2	2	0	4	1	2	0	0	3	3	3	1	4	2	2	2	2	2	0	2	0	0	3	4	3	3	3	2	2	4	2	0	2	3
OG0000225	1	1	1	2	2	2	1	2	2	3	1	1	1	2	1	2	2	4	2	1	3	1	2	3	2	1	1	2	1	1	1	1	2	2	2	1	1	2	4	3	3	2	1	3	3	2	3	2	2
OG0000226	2	2	1	2	2	2	1	2	2	2	2	1	2	2	2	2	2	2	3	2	2	0	3	2	2	2	2	2	2	3	2	2	2	2	2	2	2	2	2	2	2	2	2	2	2	2	2	2	2
OG0000227	2	2	2	3	2	2	1	2	2	2	2	2	2	2	2	2	2	0	2	2	2	1	2	2	2	2	1	2	2	2	2	2	2	2	1	1	1	2	2	3	3	2	2	3	2	2	2	2	2
OG0000228	2	2	2	2	2	2	2	2	2	2	2	2	2	2	2	2	2	0	2	2	2	2	2	2	2	2	2	2	2	3	2	2	2	2	2	2	2	2	2	2	2	2	2	2	2	2	2	2	2
OG0000229	2	7	3	4	4	2	2	0	0	4	2	2	1	1	3	2	4	0	2	0	2	0	1	2	1	6	1	1	1	1	1	1	0	0	11	2	3	0	1	4	2	2	0	1	4	1	1	0	1
OG0000230	2	3	3	2	2	2	1	2	2	2	2	1	1	2	2	1	2	1	3	1	2	2	2	3	3	3	0	2	1	1	2	1	2	2	1	2	2	1	1	2	2	1	2	2	2	2	1	2	3
OG0000231	1	2	2	2	1	2	2	2	2	2	2	0	2	2	2	2	2	1	2	2	2	2	2	2	2	2	2	2	2	3	2	2	2	2	2	2	2	2	3	2	2	2	2	2	2	2	2	2	2
OG0000232	2	3	2	2	2	5	3	1	5	2	1	2	1	2	1	2	2	3	4	0	3	0	1	2	1	3	1	4	1	1	3	1	2	0	4	0	0	4	1	2	2	4	1	3	2	4	1	5	1
OG0000233	2	2	2	2	2	2	1	2	2	2	2	1	2	2	2	2	2	0	2	2	2	1	2	2	2	2	2	2	2	2	1	1	2	2	3	1	2	2	2	2	2	2	2	2	2	2	2	2	2
OG0000234	2	2	2	2	2	2	2	1	2	2	2	1	2	2	2	2	2	0	2	2	2	1	2	2	2	2	2	2	2	2	2	2	2	1	1	2	2	2	2	2	2	3	2	2	2	2	1	2	3
OG0000235	4	4	3	4	0	4	3	1	1	9	1	1	0	0	1	1	1	0	5	0	2	0	0	1	1	2	0	5	0	0	0	0	1	0	0	0	0	7	4	6	2	3	0	3	3	3	0	1	2
OG0000236	3	3	3	2	1	4	3	1	1	2	2	0	2	2	0	2	3	0	3	0	2	1	1	2	2	2	0	5	2	2	1	2	1	1	1	2	2	4	1	3	2	3	2	2	3	3	2	1	2
OG0000237	2	2	2	2	2	2	2	2	2	2	2	1	2	2	2	1	2	0	2	1	2	1	2	3	2	2	1	2	2	2	1	2	2	2	2	2	2	2	2	2	2	2	3	2	2	2	2	2	3
OG0000238	2	2	2	2	2	2	2	1	2	2	2	1	2	2	2	2	3	1	3	2	2	1	2	2	1	2	2	2	2	2	2	2	2	2	1	1	0	1	1	2	2	1	2	2	2	3	2	2	2
OG0000239	1	2	2	3	2	2	2	1	2	3	2	2	2	2	1	2	3	3	2	1	2	1	2	1	2	2	2	3	2	2	2	2	1	1	6	1	1	1	1	2	2	2	1	2	2	2	1	2	2
OG0000240	2	2	2	2	2	2	2	2	2	2	2	1	2	2	2	2	2	1	2	2	2	1	2	2	1	2	1	2	2	2	2	2	2	2	2	1	1	2	2	3	2	2	2	2	2	2	2	2	2
OG0000241	2	2	2	2	1	3	2	1	1	3	2	0	1	3	2	3	2	6	2	1	2	1	0	2	4	2	0	3	1	0	2	1	2	1	4	1	1	2	3	2	1	1	3	4	2	4	1	2	2
OG0000242	1	1	6	1	1	4	1	2	4	1	1	1	3	5	4	3	4	0	5	2	1	1	1	4	2	9	1	4	3	3	2	3	1	1	4	1	1	2	1	1	1	2	1	1	1	1	1	4	2
OG0000243	2	2	2	2	2	2	2	1	2	2	2	1	2	2	2	2	2	1	2	2	1	1	2	2	2	2	1	2	2	2	2	2	2	2	1	2	2	2	2	2	2	2	2	2	2	3	2	2	2
OG0000244	2	1	2	2	2	2	1	2	2	2	2	0	2	2	2	2	2	0	2	2	2	1	3	2	2	2	1	2	2	1	2	2	2	2	0	2	2	2	2	2	2	2	2	2	2	2	2	2	2
OG0000245	2	2	2	2	2	2	2	1	2	2	2	2	2	2	2	2	2	2	2	2	2	1	1	1	2	2	2	2	2	2	2	1	2	2	2	3	2	2	2	2	2	2	2	2	2	2	2	2	2
OG0000246	2	2	2	2	2	2	2	1	3	2	2	2	2	2	3	2	3	1	3	1	2	1	2	2	3	2	1	2	2	2	2	1	2	1	3	0	0	2	2	2	2	2	2	2	2	2	1	3	3
OG0000247	2	2	2	1	2	2	2	2	2	2	2	0	2	2	2	2	2	0	3	2	2	1	2	2	2	2	1	2	2	2	0	2	2	2	0	2	2	2	2	2	2	2	2	2	2	2	2	2	2
OG0000248	2	2	2	1	2	2	2	3	2	2	2	1	2	2	2	3	2	2	2	1	2	1	2	2	2	2	2	2	2	2	2	2	2	2	0	2	2	1	2	2	2	1	2	2	2	2	2	2	2
OG0000249	2	2	2	1	2	2	2	1	2	2	2	1	2	2	2	2	2	2	2	2	0	0	1	2	2	2	2	2	2	2	3	2	2	2	2	2	1	2	2	2	2	2	2	2	2	2	2	2	2
OG0000250	2	2	1	1	2	5	1	0	1	1	1	1	2	6	2	3	5	0	6	0	4	0	2	4	1	3	2	4	1	2	0	1	1	0	0	0	0	1	1	2	1	3	1	3	1	5	0	1	8
OG0000251	2	2	2	1	2	2	2	2	1	2	2	1	2	2	2	3	2	0	2	2	2	1	2	1	2	2	2	2	1	2	2	2	1	2	1	1	2	2	2	2	2	2	2	2	2	2	2	1	2
OG0000252	1	2	2	5	1	2	1	1	3	4	2	2	1	1	2	2	1	2	3	1	2	0	0	4	2	2	1	2	1	1	1	0	2	1	6	0	0	3	3	2	1	2	1	2	1	3	3	3	1
OG0000253	2	2	2	1	2	3	2	2	2	2	2	1	2	2	1	2	1	0	2	2	3	1	1	2	1	2	2	2	2	2	2	2	2	1	0	1	1	2	3	3	3	2	2	3	3	1	1	2	1
OG0000254	2	4	4	0	1	4	4	1	2	2	3	3	1	1	1	1	3	0	2	1	3	0	1	2	1	4	1	3	1	1	1	1	1	1	1	1	2	1	2	2	3	1	2	3	2	3	1	2	1
OG0000255	1	6	5	3	1	4	4	1	3	6	3	0	2	1	1	2	6	0	3	1	2	1	1	1	2	4	0	1	1	1	3	1	1	1	1	1	0	1	2	3	2	1	1	3	3	3	1	3	2
OG0000256	0	2	1	0	3	3	0	0	0	0	0	1	4	0	3	1	3	1	11	0	1	0	2	0	1	1	1	7	2	1	2	1	7	2	8	0	0	7	0	1	0	1	2	2	4	6	1	0	2
OG0000257	0	2	2	3	0	4	2	0	1	2	0	1	1	1	0	0	2	1	0	1	2	0	0	0	1	2	1	4	0	1	2	1	3	0	1	1	1	6	2	4	4	3	2	2	4	3	0	1	2
OG0000258	2	2	2	2	2	2	2	3	2	2	2	1	2	2	2	2	2	0	2	2	1	0	2	2	2	2	3	2	2	2	1	1	2	1	2	2	1	3	2	2	2	3	2	2	2	2	1	2	1
OG0000259	1	3	3	1	2	2	4	1	1	5	3	1	1	2	1	3	1	0	3	1	3	0	2	1	1	3	1	2	1	1	2	0	1	1	0	1	1	1	3	2	4	1	2	5	2	2	1	1	1
OG0000260	1	4	4	0	0	3	4	0	0	2	0	0	1	3	3	1	8	0	6	1	4	0	0	3	0	2	2	3	1	2	2	0	0	0	0	0	0	1	3	4	0	0	1	3	4	1	2	0	2
OG0000261	0	1	2	0	0	4	1	0	4	2	1	1	3	2	0	5	6	1	8	1	6	1	0	3	1	0	0	1	1	1	1	0	3	12	0	15	1	3	0	3	6	4	3	5	5	5	1	6	1
OG0000262	2	2	2	3	2	2	2	1	2	3	3	1	1	2	2	2	2	6	2	1	1	0	2	1	1	3	2	2	1	1	3	1	3	1	3	2	2	1	1	4	1	1	2	2	1	2	1	2	2
OG0000263	3	2	2	1	3	1	1	0	2	2	3	1	2	3	2	2	3	2	4	1	1	1	2	2	2	2	3	2	2	2	3	2	3	1	1	1	1	1	3	2	2	1	2	1	2	2	2	2	3
OG0000264	1	1	1	2	2	2	1	2	2	2	1	0	2	2	3	2	1	1	3	2	2	0	2	2	2	1	2	2	2	2	2	2	2	2	2	1	1	3	2	2	2	2	1	2	2	1	2	2	2
OG0000265	2	2	2	2	2	2	1	2	2	2	2	0	2	2	2	2	2	0	3	2	2	0	2	2	2	1	1	2	2	2	2	3	2	1	0	3	2	2	2	2	2	2	2	2	2	2	2	2	2
OG0000266	0	0	0	3	2	0	1	1	0	4	2	0	4	2	2	1	1	0	1	8	1	0	6	5	0	1	4	0	5	1	2	2	3	1	2	2	1	0	5	0	1	0	1	0	1	1	3	0	5
OG0000267	2	2	2	1	2	2	1	1	2	2	2	1	3	2	2	2	2	0	2	1	1	1	2	1	2	2	4	2	0	2	2	4	2	2	1	1	1	3	2	2	2	3	2	2	2	2	2	2	2
OG0000268	1	3	4	2	2	4	4	1	2	3	4	4	1	1	2	2	1	4	3	1	2	0	1	1	2	2	0	3	1	1	2	1	2	0	2	0	0	2	2	2	2	1	1	2	2	1	1	2	2
OG0000269	1	2	0	2	0	0	1	1	1	6	0	1	2	3	1	1	4	0	2	3	6	1	0	0	0	1	0	3	2	1	0	1	2	0	0	0	0	0	4	0	1	2	1	3	2	4	6	1	1
OG0000270	2	4	3	2	1	3	3	2	2	4	4	2	1	1	1	1	1	1	3	1	2	2	1	1	1	3	0	2	1	1	2	1	1	2	2	1	1	2	2	2	2	2	1	3	2	2	2	2	2
OG0000271	0	0	0	0	0	1	1	0	0	2	0	0	0	2	3	2	34	0	4	2	3	0	1	1	0	0	2	16	1	1	0	0	0	9	1	0	0	2	0	2	0	0	0	12	0	3	0	0	7
OG0000272	4	8	1	2	1	0	2	0	1	1	1	1	0	4	1	2	0	1	12	0	1	0	1	1	3	3	2	3	0	0	1	0	2	0	2	0	0	1	1	7	2	1	1	1	0	0	1	1	2
OG0000273	2	10	5	3	3	0	4	0	1	3	5	1	3	4	4	7	2	0	2	0	1	4	2	6	2	7	0	0	2	3	0	1	1	0	2	0	1	2	1	0	1	1	4	1	2	1	1	1	6
OG0000274	1	2	2	1	2	3	3	0	2	2	2	2	1	0	1	1	3	0	6	2	2	0	3	0	1	3	1	4	0	0	2	0	2	1	2	0	1	8	2	2	1	7	1	4	2	2	1	2	2
OG0000275	2	2	2	2	2	2	2	1	1	1	1	2	2	3	2	2	2	6	2	1	2	0	2	2	2	2	1	2	2	2	1	3	2	1	1	1	1	1	2	2	2	1	2	3	3	3	1	1	2
OG0000276	2	1	1	4	1	2	1	2	2	1	1	2	2	2	2	2	4	0	1	2	1	1	1	1	2	1	2	2	2	2	2	2	1	2	5	1	1	2	3	2	2	2	2	2	2	2	2	2	2
OG0000277	2	1	1	2	2	1	1	1	2	1	1	0	1	2	1	3	1	2	2	2	1	2	1	2	1	1	1	1	1	0	1	1	3	3	2	2	2	6	4	1	1	6	2	1	1	3	2	2	2
OG0000278	2	2	1	1	1	3	2	2	2	2	3	3	1	2	2	1	2	0	2	1	3	1	1	2	1	2	1	2	1	1	1	1	1	1	2	2	2	2	1	3	2	2	2	3	2	3	2	2	1
OG0000279	2	2	2	2	2	2	2	1	2	2	2	2	2	2	2	2	2	3	2	2	2	1	1	2	2	2	1	2	2	2	2	2	1	1	1	2	2	1	3	2	2	1	1	2	2	2	1	2	2
OG0000280	2	2	2	3	1	1	2	1	2	3	1	0	3	2	1	3	1	0	1	1	2	1	1	2	4	2	1	1	2	2	1	1	1	1	1	2	2	6	5	1	2	8	3	2	1	1	1	2	4
OG0000281	3	3	3	1	3	1	3	2	2	1	3	0	2	2	3	2	1	1	3	2	1	0	3	2	1	5	1	1	2	3	3	2	2	1	3	2	2	1	1	1	1	1	3	1	1	2	1	2	2
OG0000282	6	5	2	3	3	1	3	0	0	4	2	0	1	1	3	8	6	0	5	0	1	0	3	2	0	3	4	0	1	0	6	1	1	0	4	0	0	1	2	2	0	0	2	0	2	2	0	0	3
OG0000283	2	2	2	2	2	2	2	1	2	3	2	0	2	2	2	2	2	0	2	2	2	1	2	1	2	2	1	2	1	2	2	1	2	2	1	1	1	2	2	2	2	2	2	2	2	2	2	2	2
OG0000284	1	2	2	3	1	4	2	1	2	3	2	1	1	0	1	2	3	0	2	0	3	0	1	1	2	2	0	3	1	1	3	1	2	0	1	1	1	2	1	3	3	2	1	4	3	3	0	2	2
OG0000285	2	2	2	1	2	2	1	1	2	2	2	0	2	2	2	2	2	0	2	1	2	0	1	3	2	2	1	2	2	2	2	2	2	2	1	1	1	2	3	2	2	2	2	2	2	2	2	2	2
OG0000286	2	2	2	2	2	2	1	1	2	2	2	1	1	1	2	1	2	3	2	1	2	0	2	1	2	2	1	3	1	1	2	1	2	1	1	1	1	5	2	3	2	5	2	2	2	2	1	2	2
OG0000287	4	2	3	1	1	2	4	2	2	2	3	0	1	1	1	1	2	1	3	1	2	1	2	1	3	3	1	2	1	1	3	1	3	1	1	1	1	2	2	2	2	2	3	2	2	2	2	1	3
OG0000288	2	2	2	1	2	2	2	2	2	2	2	0	2	2	2	2	0	0	2	2	2	1	2	2	2	2	2	2	2	2	2	2	2	2	1	2	2	2	2	2	2	2	2	2	2	0	2	2	2
OG0000289	2	7	6	1	4	1	6	0	7	1	5	1	0	5	1	1	1	0	6	0	1	0	5	2	3	7	1	2	0	1	0	0	4	0	0	0	0	0	1	3	1	0	3	1	2	0	1	6	2
OG0000290	2	2	2	1	2	2	1	1	2	2	2	1	2	2	1	1	2	0	2	0	2	0	1	1	2	2	1	2	2	2	1	1	2	2	1	2	2	1	2	2	2	1	2	2	1	2	2	3	2
OG0000291	0	3	5	2	0	1	4	0	1	4	1	2	2	3	0	3	1	3	5	0	2	0	0	2	3	4	2	3	2	2	1	2	1	0	2	0	0	1	1	1	2	1	0	4	2	1	0	1	4
OG0000292	4	1	2	0	1	0	1	0	0	0	2	0	4	7	7	9	5	3	6	0	1	0	0	3	1	1	1	1	4	4	0	3	1	0	0	1	1	5	4	1	0	9	2	1	0	11	0	0	5
OG0000293	2	2	1	2	2	2	1	1	2	2	2	0	2	2	2	2	2	0	2	2	2	1	1	2	2	2	1	2	2	1	2	2	2	2	0	1	1	2	2	2	2	2	2	2	2	2	2	2	2
OG0000294	3	5	6	3	1	5	7	0	2	7	2	0	0	0	0	0	2	0	2	1	2	0	0	0	0	5	0	2	0	0	0	0	1	0	1	0	0	0	5	2	2	2	1	3	3	2	0	1	2
OG0000295	2	2	2	1	2	2	2	1	2	2	2	1	1	1	2	1	2	1	2	2	2	1	2	1	1	2	1	2	1	1	2	1	2	1	2	2	2	2	2	2	2	2	2	2	2	2	2	2	1
OG0000296	1	1	0	1	3	5	2	0	2	1	4	1	3	5	0	2	2	0	4	1	2	1	2	1	1	3	0	1	2	2	1	1	1	0	0	3	1	0	3	1	2	0	2	2	2	2	2	2	3
OG0000297	3	1	3	0	1	1	1	0	2	4	1	6	1	2	0	2	1	0	3	1	2	1	2	2	3	4	1	4	1	1	3	1	1	1	0	0	0	1	5	3	2	1	2	5	3	2	1	2	3
OG0000298	1	2	0	0	1	5	1	0	0	1	0	0	6	4	2	3	2	0	2	0	2	0	2	4	3	2	4	7	4	3	2	3	3	0	0	0	0	3	1	4	1	2	1	2	3	4	0	0	4
OG0000299	2	1	2	1	3	5	2	0	2	1	4	1	3	5	1	2	2	0	4	1	2	1	2	1	3	3	0	1	3	2	1	1	1	0	0	2	2	0	3	1	1	0	2	3	2	2	2	2	1
OG0000300	1	0	2	1	0	1	0	0	2	5	0	1	2	11	2	5	1	4	3	1	1	1	0	2	2	3	1	1	1	1	0	2	1	1	3	2	2	11	2	3	1	12	0	1	3	4	1	1	2
OG0000301	2	2	2	1	2	2	2	1	2	2	2	2	1	1	2	1	1	2	2	2	2	1	1	1	1	2	1	1	1	0	2	1	3	1	3	2	2	1	1	2	2	1	2	2	2	2	1	2	1
OG0000302	2	1	2	1	1	3	2	0	2	2	1	2	0	0	3	0	4	1	5	0	2	0	2	0	0	2	0	4	0	0	0	0	2	0	2	0	0	4	3	1	2	1	1	4	2	5	1	2	0
OG0000303	2	4	4	2	2	2	2	0	1	2	2	0	1	2	2	2	2	1	2	0	2	1	1	1	2	4	0	2	1	1	1	1	2	1	3	2	2	1	2	2	2	1	2	2	2	2	1	1	2
OG0000304	2	2	3	1	1	2	1	1	2	2	1	1	3	3	4	2	3	0	5	1	2	1	1	2	2	7	1	3	3	2	1	3	1	1	3	2	2	2	2	2	2	0	1	2	2	2	1	2	1
OG0000305	1	1	0	1	1	2	0	1	2	2	2	0	2	2	2	2	2	0	2	1	2	1	1	2	2	2	2	3	2	2	2	2	2	2	1	1	1	3	2	2	2	3	2	3	3	2	1	2	2
OG0000306	2	4	4	1	3	1	3	1	1	3	4	2	2	2	2	3	0	1	4	0	3	3	3	1	1	7	3	2	2	1	1	1	3	2	0	0	0	2	2	1	2	2	2	2	1	1	2	1	2
OG0000307	1	1	1	1	1	2	0	1	2	2	2	1	1	2	2	2	2	0	2	2	1	2	1	2	2	3	3	3	1	2	2	2	2	2	1	1	1	2	2	2	2	3	2	2	3	2	1	2	2
OG0000308	2	2	2	3	1	3	1	1	3	3	2	2	1	2	2	1	3	0	2	2	2	0	1	0	1	2	1	2	1	1	3	1	1	0	2	0	0	3	2	2	2	3	2	2	2	3	2	4	1
OG0000309	2	3	2	1	2	1	2	2	3	2	2	2	1	2	1	1	2	0	3	2	3	1	2	1	1	3	1	2	1	1	1	1	1	2	0	1	1	5	1	2	2	4	2	2	3	3	3	3	1
OG0000310	3	2	2	1	1	1	3	0	2	3	2	1	1	2	1	2	2	1	3	0	4	1	1	1	1	2	1	1	1	1	1	0	1	2	1	1	1	2	2	2	2	2	2	4	2	1	3	2	2
OG0000311	1	2	2	1	1	2	3	1	3	2	1	1	3	2	1	2	2	1	2	2	2	0	1	2	2	2	2	1	2	2	2	2	1	1	1	1	1	2	1	2	2	2	1	2	1	2	1	3	1
OG0000312	1	2	1	2	2	1	1	1	2	2	2	3	2	2	1	2	2	1	2	2	2	0	2	1	1	2	1	1	2	2	2	2	2	1	2	1	1	1	1	2	2	1	1	2	2	2	1	2	1
OG0000313	2	2	2	2	2	2	2	2	2	2	2	0	2	2	2	2	2	1	2	2	2	0	2	2	2	2	2	2	2	2	2	2	2	0	1	1	1	2	0	2	2	2	2	2	2	2	0	2	2
OG0000314	2	3	2	1	3	2	2	1	1	2	2	1	1	3	1	1	2	0	2	1	2	1	3	1	1	3	2	2	1	0	2	1	2	1	3	0	0	2	2	2	4	2	2	2	2	2	1	1	3
OG0000315	1	2	2	1	1	2	2	0	1	4	1	2	2	1	1	1	2	1	1	1	2	1	1	1	2	3	1	2	2	3	3	5	3	1	0	2	1	1	2	2	2	2	1	2	3	2	1	2	3
OG0000316	2	2	2	2	2	2	2	0	0	2	2	2	2	2	2	2	2	5	3	1	2	0	2	2	2	2	2	2	2	2	2	2	2	0	2	0	2	2	1	2	2	2	2	2	2	2	2	0	2
OG0000317	1	2	2	0	2	2	2	1	2	3	2	1	2	2	1	1	1	0	2	1	2	1	1	1	2	2	1	2	2	2	2	1	2	1	1	1	1	2	2	2	2	2	2	2	3	2	1	2	2
OG0000318	2	2	1	2	3	3	1	2	4	2	4	2	0	3	2	2	1	0	1	2	2	2	3	2	2	2	3	2	0	0	0	0	0	1	5	0	0	3	2	2	2	2	3	1	1	2	2	3	2
OG0000319	2	1	1	0	3	2	3	2	0	1	1	0	2	0	1	1	1	0	1	2	2	1	2	1	0	1	0	3	0	0	1	1	1	1	0	0	0	1	1	1	2	3	4	2	3	1	5	0	4
OG0000320	1	1	1	2	1	5	1	2	2	4	2	1	1	1	2	1	3	0	1	1	3	1	1	0	1	1	0	4	1	1	1	1	1	1	1	1	1	1	1	3	4	1	2	3	1	3	0	2	2
OG0000321	3	2	2	2	1	2	2	2	2	3	2	1	0	1	2	1	4	0	2	2	2	1	1	2	1	2	1	2	1	1	4	1	1	1	2	1	1	1	2	2	2	2	2	2	2	3	1	2	2
OG0000322	3	2	2	1	1	1	2	1	3	2	3	0	2	2	2	3	1	0	2	2	1	2	2	2	4	2	1	1	3	1	3	2	3	2	0	1	1	2	2	1	1	2	2	1	2	1	0	3	3
OG0000323	2	3	3	0	3	1	3	2	2	2	3	0	1	1	3	1	1	1	4	1	1	1	3	1	1	3	2	1	1	1	2	1	3	1	2	1	2	1	3	1	1	1	2	1	1	1	2	1	1
OG0000324	0	3	2	1	3	4	2	1	2	2	2	1	2	2	2	2	1	0	2	2	2	0	2	1	2	3	1	1	2	2	2	3	1	1	2	1	1	1	2	2	2	1	1	2	2	3	2	2	2
OG0000325	2	2	2	1	2	2	2	1	2	2	2	2	2	2	2	2	2	0	2	2	2	0	2	2	2	2	2	2	2	2	2	2	2	0	1	0	0	1	2	2	2	1	2	2	2	2	1	2	2
OG0000326	1	2	3	0	2	3	2	1	2	2	2	0	2	2	3	2	3	0	2	2	2	0	2	2	2	3	2	3	2	2	2	2	0	0	0	0	0	1	1	2	3	1	0	2	2	3	1	2	2
OG0000327	3	2	2	0	2	1	2	0	2	2	2	1	2	3	1	2	2	2	1	2	2	0	1	1	1	2	1	2	2	2	1	1	2	0	0	0	1	3	2	3	2	3	3	2	2	2	1	4	1
OG0000328	1	2	2	2	2	2	2	1	2	2	2	0	2	2	2	2	2	1	2	1	2	1	2	2	2	2	3	2	2	2	2	2	1	1	1	0	0	2	2	2	2	2	1	2	2	2	2	2	2
OG0000329	1	2	2	2	3	5	2	0	3	4	1	1	0	0	1	0	6	0	2	0	2	0	3	1	2	2	0	3	0	0	1	0	1	1	0	0	0	2	1	1	2	3	2	2	1	8	1	3	3
OG0000330	0	1	0	7	0	2	0	0	0	3	0	0	5	1	10	3	4	2	5	0	2	0	0	0	0	0	0	2	3	7	0	2	0	0	2	0	0	5	3	2	0	3	0	2	0	1	0	0	10
OG0000331	2	3	3	1	2	1	3	1	1	1	2	0	1	1	2	1	1	5	3	1	1	1	2	0	2	3	1	1	1	2	2	1	2	2	1	2	4	2	2	1	1	2	2	1	1	1	2	1	2
OG0000332	2	2	2	2	2	2	1	1	1	2	2	1	1	1	1	1	2	1	2	1	2	0	2	1	1	2	1	2	1	1	2	1	2	1	3	1	2	1	2	2	2	1	2	2	2	2	1	1	1
OG0000333	2	2	1	0	2	2	1	1	2	2	3	2	1	2	4	3	2	1	2	1	2	0	2	1	2	2	1	2	1	1	1	1	1	1	1	1	1	5	3	2	2	2	2	2	2	2	1	2	1
OG0000334	2	2	2	2	2	2	2	2	1	2	2	0	1	3	2	3	2	0	2	0	2	1	1	2	1	2	0	2	1	1	1	2	2	1	1	3	3	1	2	2	2	1	2	2	2	2	1	1	2
OG0000335	2	2	2	1	0	1	2	0	1	2	3	0	4	2	1	1	1	3	5	0	2	0	0	2	1	2	3	2	4	1	0	2	1	1	0	1	1	1	3	5	1	1	2	4	2	1	1	1	10
OG0000336	1	2	2	2	2	2	2	1	2	2	2	1	0	2	2	2	2	1	2	1	1	1	2	1	2	2	1	2	1	1	2	1	2	1	1	1	1	4	1	2	2	2	2	2	2	2	1	2	2
OG0000337	2	0	1	0	1	2	2	1	2	2	1	2	2	2	1	1	2	2	3	1	2	1	2	2	2	1	1	1	2	2	1	2	2	1	2	1	1	1	1	2	2	1	2	3	3	2	1	2	2
OG0000338	1	2	1	1	1	1	2	2	2	3	0	0	1	1	1	1	2	1	2	1	4	1	1	1	2	2	1	2	1	1	1	1	1	1	1	1	3	4	2	2	2	4	0	4	2	2	1	2	3
OG0000339	2	2	2	1	1	2	2	0	1	3	2	1	1	1	0	3	1	1	2	1	3	0	1	1	1	2	1	1	1	1	1	2	2	0	2	1	1	0	2	3	1	0	1	3	3	3	1	1	2
OG0000340	3	7	5	0	5	2	6	0	0	1	3	1	0	1	2	0	2	1	6	0	1	0	6	0	2	7	0	1	0	0	0	0	5	0	1	0	0	0	0	2	2	0	2	1	1	6	0	0	4
OG0000341	3	7	6	0	2	2	6	1	1	1	3	2	1	1	0	0	1	0	2	1	2	0	2	1	1	10	2	1	1	1	1	1	2	0	0	0	0	2	1	2	2	1	4	2	1	1	1	1	1
OG0000342	3	2	2	0	2	3	2	0	1	3	2	0	3	3	2	3	3	0	2	0	2	0	2	2	3	2	1	3	3	3	2	3	2	0	0	0	0	1	1	2	2	1	3	2	2	3	0	1	4
OG0000343	3	3	3	1	6	1	2	1	2	2	4	1	1	1	4	1	1	1	7	0	1	1	6	3	5	3	0	1	0	1	4	0	2	1	3	0	0	2	1	1	1	1	3	1	1	1	1	2	2
OG0000344	0	2	2	0	2	3	2	0	3	3	2	1	4	2	2	3	3	0	0	2	3	0	2	2	3	2	0	2	3	4	0	3	0	0	0	0	0	0	2	2	3	0	0	3	2	3	0	3	2
OG0000345	2	1	1	1	2	2	1	1	2	2	1	0	1	2	1	2	3	1	1	1	2	0	1	1	3	1	0	2	1	0	1	0	1	1	4	1	1	2	2	2	1	1	3	3	2	4	1	2	4
OG0000346	1	2	3	1	2	3	3	1	1	1	3	0	1	1	2	1	3	2	1	1	2	1	2	1	2	2	1	2	1	1	2	1	2	1	1	2	1	2	1	1	2	2	1	2	1	2	1	1	2
OG0000347	2	2	1	1	1	2	3	0	1	4	1	0	0	1	2	1	2	8	6	0	1	0	1	0	0	1	1	3	0	0	0	0	2	0	7	2	2	2	1	2	1	2	1	1	3	3	1	1	0
OG0000348	2	2	2	0	2	2	1	1	2	2	1	2	2	2	1	1	2	1	1	2	2	0	1	1	2	2	1	2	2	3	2	2	1	2	1	1	1	2	1	2	2	2	1	2	2	2	2	2	1
OG0000349	2	0	0	0	0	1	0	0	2	1	0	0	3	4	1	5	1	0	0	1	3	0	0	3	2	0	1	1	2	2	1	2	0	0	0	0	0	4	4	0	2	4	1	4	0	5	0	2	9
OG0000350	1	1	1	2	2	2	1	2	2	1	2	1	2	2	2	2	2	0	2	2	1	1	2	3	2	1	1	2	2	2	2	2	2	1	2	1	2	2	1	2	1	2	1	2	2	2	1	2	2
OG0000351	4	3	3	1	4	2	3	0	1	1	4	0	2	2	2	2	1	0	3	1	1	1	4	1	2	3	2	2	1	2	3	1	3	3	1	0	0	2	2	1	1	2	4	1	1	1	1	1	2
OG0000352	2	3	4	2	1	2	1	3	2	1	2	2	2	0	1	1	0	2	2	1	2	1	1	1	1	4	0	1	2	1	1	1	2	1	2	1	1	4	1	1	0	4	1	2	1	3	1	1	1
OG0000353	5	3	2	1	1	1	2	0	0	1	2	0	0	0	2	3	1	5	7	1	0	0	4	2	2	5	1	0	1	2	0	0	1	0	1	1	1	1	17	3	0	2	2	0	4	2	0	0	3
OG0000354	2	2	2	1	2	2	1	0	2	2	2	1	2	2	2	2	2	0	2	1	2	0	0	2	2	2	2	2	2	2	2	3	3	0	1	1	1	1	1	2	2	1	2	2	3	2	0	2	2
OG0000355	3	1	3	2	1	3	1	1	5	1	1	1	1	2	3	2	2	0	2	1	1	1	1	2	2	5	1	3	1	1	2	1	0	1	0	1	1	1	2	1	1	0	2	1	1	2	2	5	2
OG0000356	2	2	1	1	2	1	2	1	2	1	3	1	2	3	1	2	2	1	2	1	1	3	2	2	2	2	0	1	2	2	2	1	1	2	2	1	1	2	2	2	1	2	2	1	2	2	1	2	2
OG0000357	0	3	4	0	0	1	4	0	0	5	1	0	1	2	0	1	0	2	3	0	2	0	1	2	3	5	1	3	1	1	0	1	0	0	0	0	0	1	2	1	2	1	0	5	2	2	0	0	3
OG0000358	2	1	0	1	2	2	0	1	2	3	2	2	1	2	0	1	3	2	1	1	3	0	1	1	2	1	1	3	1	0	0	1	1	1	2	0	0	1	1	3	2	1	2	3	3	3	1	2	2
OG0000359	2	2	2	3	1	2	2	0	3	3	2	0	1	2	2	1	2	1	2	1	2	0	1	2	3	2	1	2	1	0	1	1	1	0	1	0	0	2	2	2	2	2	2	2	2	1	0	3	2
OG0000360	2	1	1	2	1	2	1	1	1	2	1	0	1	1	1	1	1	0	2	1	2	1	1	0	2	1	2	2	1	1	3	1	1	1	1	1	1	2	2	2	3	2	2	2	2	2	1	1	2
OG0000361	2	1	1	0	1	3	1	0	0	2	1	2	3	3	2	3	3	1	1	1	1	0	1	3	3	1	2	3	3	4	1	4	1	1	0	1	1	3	1	2	1	2	2	1	2	3	1	0	3
OG0000362	2	2	2	1	2	2	2	1	1	2	2	2	2	2	2	2	2	0	2	1	2	0	2	3	2	2	2	2	2	2	2	1	2	1	3	0	0	1	1	2	1	1	2	2	2	2	1	1	2
OG0000363	1	2	1	1	1	5	1	0	1	2	1	1	0	0	2	0	4	0	4	1	3	1	1	1	0	2	0	3	0	0	1	0	0	1	0	1	1	2	1	3	3	2	1	3	3	4	1	1	0
OG0000364	2	2	2	0	2	2	1	2	2	2	2	2	1	1	2	1	1	5	1	1	0	0	2	2	1	2	1	1	1	1	2	1	2	2	0	1	1	4	2	2	2	4	2	0	2	1	2	2	2
OG0000365	1	2	2	1	1	2	2	0	3	2	1	1	1	2	1	3	2	0	1	2	1	1	1	0	2	4	1	2	1	1	2	1	2	1	1	0	1	0	1	2	3	0	3	1	2	1	0	3	2
OG0000366	2	2	2	1	1	1	2	1	1	3	3	3	1	1	1	1	1	1	2	1	3	1	1	1	1	2	1	4	1	1	1	1	1	0	1	1	1	1	3	2	2	3	1	2	2	2	1	1	1
OG0000367	1	2	2	1	1	2	2	1	2	3	2	1	1	1	1	1	2	0	2	1	2	0	0	1	1	2	1	2	1	1	1	1	1	1	1	1	1	2	2	2	2	2	3	2	2	2	1	2	1
OG0000368	1	1	1	1	1	2	1	1	1	3	1	1	2	2	2	2	2	1	2	1	2	1	1	2	2	1	1	2	2	2	1	2	2	1	1	1	1	2	1	2	2	2	1	2	2	2	1	1	2
OG0000369	2	1	0	3	0	1	1	1	0	5	0	0	1	3	1	2	8	2	3	0	3	0	2	0	0	1	0	1	1	1	1	1	1	0	3	0	0	10	1	2	0	5	2	2	2	7	2	0	0
OG0000370	1	3	2	1	1	1	2	0	1	1	2	0	2	3	2	2	1	2	4	1	1	0	2	1	1	3	1	3	1	1	2	1	1	1	2	0	0	4	2	1	1	5	2	1	2	1	1	1	2
OG0000371	1	1	1	2	3	1	2	2	1	2	3	1	1	1	1	2	3	0	2	1	1	1	3	1	1	1	0	1	1	1	2	1	4	1	1	1	1	1	1	1	1	1	1	1	2	4	2	1	1
OG0000372	1	2	1	2	1	1	1	1	1	2	1	0	1	2	1	1	2	1	2	1	2	0	1	1	1	1	1	1	1	1	1	0	1	2	1	1	1	4	3	2	2	2	1	3	2	2	2	1	1
OG0000373	3	2	2	1	1	1	2	1	1	1	3	0	1	1	2	1	1	1	3	1	1	1	1	3	1	2	0	1	1	1	1	1	1	1	3	2	2	8	1	3	1	6	3	1	1	1	2	1	1
OG0000374	2	2	1	1	1	2	2	3	2	2	2	3	1	1	2	1	4	1	2	1	2	1	1	1	2	2	1	2	1	1	2	1	3	1	1	1	1	2	1	3	2	2	1	2	2	2	1	2	2
OG0000375	2	2	0	2	2	1	0	2	1	1	2	0	2	2	2	2	1	0	3	1	1	1	2	1	2	2	1	1	2	2	2	2	2	2	2	2	2	2	2	1	1	2	2	1	1	2	2	1	2
OG0000376	5	4	3	0	3	1	7	0	2	2	2	1	0	2	2	1	1	3	4	0	1	0	2	1	1	5	0	3	0	0	1	0	1	0	3	0	0	4	3	1	1	2	0	3	1	2	4	3	1
OG0000377	4	2	2	0	3	1	2	2	1	0	2	0	1	1	3	1	1	0	2	0	1	2	3	2	1	2	1	1	1	1	2	2	3	4	0	1	1	2	3	1	1	2	5	1	1	1	4	1	1
OG0000378	1	3	1	0	1	3	1	1	3	2	1	0	5	0	3	0	3	0	3	4	0	1	0	3	0	1	1	3	1	3	0	0	2	0	4	0	0	2	2	3	0	2	2	0	7	2	1	1	5
OG0000379	2	2	4	1	1	2	3	0	0	4	2	1	2	1	1	2	2	0	2	0	2	1	1	1	1	2	1	2	2	2	1	2	1	1	0	1	1	8	1	3	2	5	1	2	2	3	1	0	1
OG0000380	1	3	2	2	3	2	3	0	2	2	2	2	0	2	1	2	2	3	2	0	2	0	4	1	2	3	1	2	0	0	0	0	0	1	2	1	1	1	2	1	2	1	1	2	2	2	1	2	1
OG0000381	3	2	2	1	2	1	2	2	2	4	3	0	1	1	1	1	1	0	3	1	3	0	2	1	1	2	1	1	2	1	1	1	1	1	0	1	1	1	4	1	1	1	2	1	1	1	1	2	1
OG0000382	1	2	2	2	1	2	2	0	2	2	2	2	2	0	0	1	1	0	2	2	2	0	3	0	2	2	0	2	4	2	3	2	4	0	1	0	0	1	3	2	2	4	1	2	2	1	2	2	2
OG0000383	2	3	2	2	3	2	2	0	1	2	3	2	1	0	1	0	2	0	3	0	2	2	4	0	0	3	0	2	0	0	2	0	3	1	0	1	1	1	2	1	2	1	2	2	1	2	2	1	1
OG0000384	2	1	3	1	1	2	2	1	1	1	1	0	2	1	3	2	4	0	2	1	1	0	2	4	2	1	1	4	2	1	1	3	2	1	0	1	1	1	2	1	1	1	2	1	1	1	1	1	2
OG0000385	3	2	2	2	1	1	2	2	2	2	2	0	0	2	2	2	3	0	2	2	1	0	1	2	2	1	2	1	1	1	2	1	1	1	2	1	1	1	2	1	1	3	2	1	1	2	1	2	2
OG0000386	0	0	4	3	1	0	0	1	0	0	0	0	1	1	1	0	1	0	14	2	1	1	0	0	0	39	0	12	1	1	0	1	1	0	6	11	0	9	3	0	0	4	3	5	1	0	3	2	0
OG0000387	1	2	2	1	1	1	2	3	2	4	1	0	4	1	1	1	3	1	2	0	2	1	1	1	1	3	1	2	1	1	0	1	1	1	3	1	1	3	1	1	1	3	1	2	2	3	1	2	2
OG0000388	2	2	2	0	2	2	1	1	1	2	1	1	2	2	1	2	2	2	1	0	2	0	2	2	3	2	2	2	2	2	2	2	2	1	0	0	0	1	1	2	2	1	2	2	2	2	1	1	3
OG0000389	1	1	1	2	1	3	1	1	4	3	1	0	1	1	1	1	1	0	1	1	2	1	1	1	1	1	1	2	1	0	1	1	1	1	1	1	1	1	1	2	3	1	1	2	2	1	1	4	1
OG0000390	1	5	6	1	2	2	5	1	1	3	3	0	2	2	1	2	1	0	4	1	1	1	1	2	3	5	1	1	2	2	2	2	1	1	0	0	0	6	3	1	0	9	1	0	2	0	2	1	3
OG0000391	2	2	2	2	2	2	2	1	1	2	2	1	1	1	1	1	1	0	3	1	2	0	2	2	1	2	1	2	1	1	1	1	1	1	1	0	2	0	2	3	1	0	1	2	3	1	1	1	1
OG0000392	2	2	2	1	2	1	2	1	2	2	1	1	1	1	1	1	1	1	3	1	2	0	1	1	1	2	1	2	1	1	1	1	1	1	2	1	1	1	1	2	2	1	1	2	2	1	2	2	1
OG0000393	1	3	2	1	1	2	2	1	3	1	1	1	2	2	1	2	2	2	3	2	1	0	2	2	2	3	1	1	2	2	3	2	2	1	2	1	1	2	2	2	1	2	1	1	2	2	2	2	1
OG0000394	1	1	1	1	1	3	1	1	1	2	1	0	1	1	1	1	2	2	1	2	2	1	1	1	1	1	0	2	2	2	0	1	1	1	4	0	0	3	1	2	2	3	1	2	1	2	1	1	3
OG0000395	2	5	3	2	2	3	3	1	4	2	2	0	2	3	2	2	2	0	2	1	1	0	2	1	2	4	2	2	2	2	1	2	1	1	1	0	0	2	1	1	1	2	2	1	1	4	1	3	1
OG0000396	1	2	2	0	1	1	2	2	2	3	2	0	2	2	1	1	1	6	1	1	3	0	0	2	0	2	1	2	2	2	3	2	1	0	0	1	1	3	3	2	2	3	1	3	2	1	0	2	1
OG0000397	2	2	1	0	1	5	1	0	1	1	1	0	2	3	2	1	4	0	5	0	3	0	1	3	0	3	2	3	1	2	0	1	1	0	0	0	0	3	1	2	1	4	1	2	1	3	0	1	5
OG0000398	1	1	1	2	1	2	1	1	2	2	1	1	1	2	1	2	2	1	2	1	2	1	1	1	2	1	2	2	1	1	1	1	1	1	2	1	1	1	1	2	2	1	1	2	2	2	1	2	2
OG0000399	3	2	2	2	2	3	2	0	2	4	2	1	1	3	1	2	3	2	2	0	2	0	2	1	2	1	0	3	2	1	1	1	2	0	1	1	1	2	1	2	1	2	3	2	2	3	0	2	3
OG0000400	3	1	1	1	1	1	1	1	2	1	1	2	0	1	2	1	1	1	2	2	2	0	1	1	2	1	1	1	1	1	1	2	1	1	1	2	2	2	1	2	2	2	3	2	2	1	1	2	2
OG0000401	0	2	6	0	0	1	2	0	0	2	0	1	0	0	3	0	20	0	3	0	5	0	0	0	1	3	0	5	0	0	2	0	2	0	0	0	0	4	0	2	0	2	0	7	1	2	0	0	0
OG0000402	2	4	3	2	1	1	3	1	2	3	2	1	0	1	1	1	1	2	4	1	0	1	1	0	1	3	0	3	1	1	2	1	1	1	1	1	1	4	2	1	1	4	1	1	1	1	1	1	2
OG0000403	2	2	2	1	1	1	1	1	1	2	1	1	2	1	3	1	2	0	4	1	2	1	1	1	2	3	1	2	2	1	1	2	1	1	2	2	2	2	2	2	2	0	1	2	2	2	1	1	1
OG0000404	0	1	2	1	1	4	1	1	1	2	2	3	1	1	2	1	3	0	2	1	2	0	1	2	2	1	0	3	1	1	2	1	1	0	0	0	0	2	1	2	2	1	0	2	3	3	1	1	1
OG0000405	3	2	2	1	2	2	2	2	1	2	5	1	1	1	1	1	2	0	1	1	3	0	3	1	1	2	1	1	1	1	2	1	1	1	0	1	1	1	2	1	1	1	1	3	2	2	2	1	1
OG0000406	0	1	1	1	1	3	1	1	3	2	2	1	1	1	3	1	4	0	3	1	3	0	1	1	1	1	0	3	1	1	1	1	1	0	0	0	0	2	1	1	3	1	0	3	2	2	1	3	1
OG0000407	2	3	3	0	3	4	3	1	1	1	2	1	0	1	2	0	3	0	3	1	0	0	4	1	1	3	0	1	0	0	2	0	1	4	2	0	0	4	1	1	0	5	2	0	0	3	1	1	0
OG0000408	4	2	2	1	1	1	1	2	1	1	1	0	0	0	2	0	1	0	2	2	1	1	1	1	0	2	0	1	0	0	1	0	1	2	0	5	5	6	4	1	1	5	4	1	1	1	2	1	0
OG0000409	1	1	1	1	1	2	1	1	2	2	2	0	2	1	2	2	3	2	2	2	1	0	1	1	2	1	1	3	2	2	2	2	2	1	1	1	1	3	1	2	1	2	1	1	2	3	1	2	2
OG0000410	2	4	3	0	2	5	3	0	2	3	3	1	1	0	1	0	3	1	5	0	3	0	3	0	1	4	0	1	1	1	0	1	1	0	1	1	1	0	1	2	3	2	0	4	2	1	0	1	1
OG0000411	1	2	1	1	1	4	1	1	1	1	2	2	1	1	1	1	1	2	2	1	1	2	1	0	1	2	1	1	1	1	2	1	2	2	5	1	1	3	3	1	2	1	1	1	1	1	1	1	3
OG0000412	2	2	2	1	2	2	1	1	2	2	2	1	0	2	3	2	1	1	2	1	1	0	2	1	1	1	1	2	0	0	1	0	2	2	0	0	0	4	3	2	1	4	2	1	2	1	3	1	2
OG0000413	1	1	1	0	1	2	1	0	2	1	1	1	1	2	1	0	1	0	2	1	2	2	1	1	2	1	1	2	1	1	1	1	2	2	1	1	1	0	1	2	2	0	1	2	2	2	2	1	1
OG0000414	2	2	2	1	2	1	2	1	2	1	2	1	2	1	2	1	1	1	2	2	1	1	2	1	1	2	0	1	2	1	2	2	2	1	1	1	1	2	1	1	1	2	2	1	1	0	1	2	2
OG0000415	1	2	2	2	2	1	3	1	2	2	2	0	1	2	1	2	1	3	2	1	1	0	1	2	0	2	1	1	1	1	4	1	1	1	1	1	1	2	1	2	1	2	1	1	1	1	1	2	2
OG0000416	2	2	2	0	1	2	2	1	1	3	1	1	1	1	1	1	1	1	2	1	2	1	0	1	1	2	1	3	1	1	2	1	2	1	1	1	1	2	1	2	2	2	2	2	2	1	1	1	1
OG0000417	2	0	0	2	2	2	0	0	4	2	0	2	2	2	2	2	2	5	0	2	2	0	2	2	2	0	2	2	2	2	0	2	0	0	0	1	1	0	0	2	2	0	2	2	2	2	0	4	2
OG0000418	4	2	1	1	2	2	1	0	1	2	1	0	1	1	2	1	2	0	4	1	2	1	2	1	1	2	0	2	1	1	1	3	2	0	1	1	1	1	1	2	2	1	3	2	2	2	1	1	1
OG0000419	3	2	1	2	2	4	2	1	2	2	2	1	1	2	1	2	3	0	1	1	1	2	2	1	2	2	2	1	1	1	1	1	1	0	1	1	1	0	0	2	1	1	3	1	2	2	1	2	1
OG0000420	2	1	0	1	1	1	0	2	2	1	1	0	1	2	1	2	1	3	1	2	1	1	1	1	2	1	1	1	2	2	1	1	1	2	2	1	2	2	1	1	1	2	2	1	1	1	2	2	2
OG0000421	2	2	2	2	2	2	2	1	2	2	2	1	0	0	3	0	0	0	2	1	2	0	2	1	0	2	2	2	0	1	1	1	1	2	2	2	2	0	2	2	2	0	2	2	2	0	1	2	0
OG0000422	2	3	3	1	1	0	1	0	3	1	1	2	1	4	2	3	0	2	4	3	4	0	0	0	0	9	0	3	1	0	0	0	0	0	1	0	0	1	0	1	0	2	2	5	0	0	0	4	0
OG0000423	2	2	2	2	2	2	2	1	1	2	2	1	0	1	1	1	2	1	2	1	2	0	0	1	1	2	1	2	1	0	2	0	2	1	1	1	2	1	1	1	2	1	2	2	1	2	1	1	1
OG0000424	1	1	1	1	1	5	1	0	1	1	1	0	1	1	3	1	2	1	3	1	3	0	1	1	2	1	0	2	1	0	0	1	1	0	1	0	0	0	3	1	2	0	1	3	1	2	2	1	1
OG0000425	2	2	3	1	0	2	3	0	2	3	2	0	1	1	1	1	2	0	3	1	2	0	0	2	2	2	0	4	2	1	2	0	0	0	2	0	0	1	2	1	1	2	1	3	1	1	0	1	2
OG0000426	1	2	2	1	1	2	2	1	1	2	2	1	1	1	1	1	2	2	2	1	2	0	2	1	3	2	1	2	1	1	1	1	1	1	2	0	1	3	2	2	1	3	1	2	2	2	1	1	1
OG0000427	1	11	8	0	5	1	8	0	0	0	2	0	0	0	4	0	4	0	16	0	2	0	8	6	0	11	0	1	0	0	5	0	1	0	0	0	0	0	0	0	0	0	1	1	0	1	0	0	0
OG0000428	4	3	6	1	1	0	1	2	2	4	1	1	1	1	5	2	2	0	1	0	2	0	1	1	0	6	1	1	0	1	0	0	1	0	2	0	0	0	6	2	0	0	3	0	6	1	4	2	4
OG0000429	4	7	6	2	8	0	9	0	0	2	3	1	0	0	1	0	0	0	4	0	0	0	10	0	0	5	0	0	0	0	2	0	4	0	0	0	1	2	3	0	1	2	2	1	0	0	0	0	0
OG0000430	5	5	3	4	4	2	3	0	0	2	3	0	0	0	1	0	3	2	5	0	1	0	4	0	0	4	0	1	0	0	4	0	4	0	1	1	3	1	0	1	1	2	5	1	1	1	0	0	0
OG0000431	1	1	2	1	1	2	0	1	2	2	1	1	0	1	2	2	1	0	1	1	2	1	1	2	2	1	1	2	1	1	1	1	1	1	1	1	1	1	1	2	2	1	1	2	2	1	1	2	2
OG0000432	0	2	0	3	1	5	0	0	0	3	1	0	0	0	2	1	11	0	6	0	2	0	2	8	0	3	0	0	0	0	0	0	1	0	0	0	1	0	4	0	0	0	3	2	0	6	0	0	3
OG0000433	2	2	2	1	2	2	2	0	1	2	2	1	1	2	2	1	4	0	2	0	2	0	2	3	2	2	2	2	1	2	2	2	2	0	0	0	0	0	1	2	2	0	2	2	2	4	0	1	2
OG0000434	3	1	0	2	0	1	0	0	2	7	1	0	0	0	1	0	2	0	0	0	1	0	0	0	0	1	0	0	0	0	0	0	0	0	3	0	0	1	2	0	1	1	0	0	6	4	1	2	3
OG0000435	1	1	1	1	1	2	1	0	2	1	1	0	1	4	1	0	1	0	2	1	2	1	1	1	2	1	1	2	1	1	1	2	1	2	1	1	1	0	1	2	2	0	1	2	2	2	2	1	1
OG0000436	1	0	0	0	0	2	0	0	3	3	0	0	4	3	0	4	1	0	0	1	4	0	0	1	2	0	1	1	2	2	1	1	0	2	0	0	0	3	1	0	1	3	1	3	0	2	0	3	6
OG0000437	2	2	2	1	2	1	2	0	5	1	2	0	1	3	1	2	1	1	2	2	1	1	2	1	2	2	3	1	1	1	2	1	2	1	0	0	0	3	1	1	1	3	2	1	1	1	1	4	2
OG0000438	1	3	2	0	1	1	1	1	2	2	3	0	1	1	1	1	1	0	2	1	1	1	1	1	1	3	1	1	1	1	3	1	1	1	1	2	2	1	2	1	2	1	2	1	1	1	1	2	1
OG0000439	1	2	1	1	1	2	1	2	1	1	3	1	1	1	2	1	2	1	1	0	2	1	1	1	1	2	1	2	1	1	0	1	0	1	1	0	0	2	1	1	2	1	1	2	1	4	0	1	2
OG0000440	2	1	1	2	1	2	1	2	4	1	1	1	1	1	1	0	2	0	1	1	1	1	1	2	2	1	1	2	1	1	2	1	1	1	2	1	1	5	2	1	1	5	2	1	1	1	1	4	2
OG0000441	1	1	1	2	2	2	1	1	2	2	2	1	1	1	1	2	1	0	1	1	2	1	2	1	1	1	1	2	1	1	1	1	1	1	1	1	1	1	1	2	2	1	1	2	2	2	1	2	2
OG0000442	2	2	2	2	3	2	2	0	2	2	2	1	3	2	1	2	1	0	2	0	1	0	2	2	1	2	3	2	2	3	0	2	2	0	0	0	0	1	0	1	1	1	2	1	4	2	0	2	1
OG0000443	2	3	6	2	1	1	5	1	1	4	2	1	1	0	0	0	1	0	5	1	2	0	1	1	0	3	0	2	1	2	2	1	1	0	0	1	0	0	2	2	1	0	1	4	1	1	1	1	1
OG0000444	2	2	4	1	3	1	2	1	2	3	4	1	2	4	1	3	1	0	4	3	2	0	2	1	1	1	3	2	1	2	1	0	2	1	0	1	0	1	1	0	1	1	2	1	0	1	3	1	2
OG0000445	2	2	2	2	2	2	2	0	0	2	2	1	1	1	2	1	2	0	2	0	2	1	2	1	1	2	1	2	1	1	0	1	0	2	2	0	0	2	2	3	2	2	2	3	2	2	2	0	2
OG0000446	2	3	3	1	3	2	3	0	1	0	3	1	0	0	0	2	3	0	4	0	1	0	3	0	2	3	0	2	0	0	1	0	3	0	1	3	3	3	3	2	0	3	2	1	2	2	0	1	2
OG0000447	2	3	3	1	0	1	0	6	0	0	1	0	0	1	3	0	1	0	12	2	3	0	3	0	0	0	0	4	0	0	0	0	1	0	0	0	0	5	8	5	0	1	1	2	2	1	5	0	2
OG0000448	1	2	1	1	1	2	2	1	1	2	1	1	2	2	1	2	2	0	2	1	1	1	1	2	2	2	0	3	2	2	1	2	2	1	1	1	1	1	1	2	1	1	1	1	2	2	1	1	2
OG0000449	1	1	1	1	1	2	1	2	1	1	1	1	2	1	1	2	3	0	1	1	2	1	1	1	1	1	1	3	1	1	1	1	1	1	0	0	0	1	1	2	3	1	1	2	1	2	1	1	3
OG0000450	1	3	3	0	0	2	1	0	5	6	2	1	0	1	1	2	4	2	4	0	2	0	0	0	2	3	1	5	0	0	0	0	4	1	1	0	0	1	3	1	0	2	3	1	0	4	0	5	3
OG0000451	5	2	2	0	4	1	2	0	0	1	2	0	3	4	2	4	0	0	2	0	1	0	4	2	5	2	1	1	3	2	2	3	5	0	0	0	0	0	0	2	1	0	3	1	2	0	0	0	4
OG0000452	2	2	1	1	0	2	1	0	1	1	3	0	2	2	2	2	3	3	5	1	1	0	0	0	2	3	3	0	2	2	1	2	4	0	0	0	0	3	1	6	0	3	1	2	3	5	0	1	2
OG0000453	1	2	2	1	1	3	2	2	2	3	1	1	1	1	1	2	2	0	1	1	2	1	1	1	1	2	1	2	1	1	1	1	1	1	0	0	0	1	2	3	2	2	1	2	2	2	1	2	1
OG0000454	2	2	2	1	1	2	1	1	1	2	1	0	1	1	2	0	2	0	2	1	2	1	1	1	2	2	1	1	1	1	2	1	1	1	1	1	1	2	1	1	2	2	3	2	2	2	1	1	2
OG0000455	1	2	1	2	2	1	1	1	1	1	2	1	1	3	2	1	1	4	2	1	1	0	2	1	1	2	2	1	1	1	1	1	2	1	2	1	1	4	1	1	1	2	1	1	1	1	1	1	1
OG0000456	2	2	2	0	1	1	2	2	2	1	2	1	1	1	2	1	1	2	2	1	1	2	1	0	1	2	1	1	1	1	2	1	1	3	2	2	3	2	2	1	1	2	2	1	1	1	2	2	1
OG0000457	2	2	2	1	1	2	2	1	1	2	2	0	2	3	2	2	1	3	2	0	2	0	0	0	1	2	1	1	2	2	0	1	1	1	4	0	0	3	2	2	1	3	2	2	2	1	1	1	1
OG0000458	4	2	2	2	3	0	2	3	2	0	2	0	0	0	2	0	0	0	2	2	0	1	2	0	2	2	0	0	0	0	2	0	3	3	0	3	3	5	3	0	0	4	3	0	0	0	3	2	2
OG0000459	3	3	2	1	0	2	4	2	0	2	1	0	1	0	3	1	0	0	2	1	3	0	2	1	0	4	0	1	0	1	0	0	0	0	1	0	0	0	1	0	0	0	1	2	1	0	5	1	2
OG0000460	2	1	0	1	1	2	1	1	4	3	1	1	1	2	1	1	1	2	2	1	1	1	1	1	1	1	1	2	1	1	1	0	3	1	1	1	1	2	2	2	1	1	1	1	1	1	1	4	1
OG0000461	1	1	1	1	1	2	1	2	2	2	1	1	1	2	2	2	2	0	1	1	2	0	1	2	1	1	1	2	1	1	2	1	1	0	1	1	1	0	1	3	2	0	1	2	3	2	1	2	1
OG0000462	2	4	4	0	1	1	3	1	0	1	2	1	2	4	2	4	0	0	3	0	0	0	1	5	3	4	2	0	3	4	2	5	3	1	0	1	1	0	0	2	1	0	2	0	0	0	1	0	3
OG0000463	2	2	2	1	2	2	2	1	1	2	2	1	1	1	2	1	2	0	3	1	2	1	2	2	2	2	3	1	1	1	2	2	2	1	2	0	0	2	1	1	1	2	2	2	1	2	1	1	2
OG0000464	1	2	2	1	1	2	2	1	2	1	2	1	1	1	2	1	2	7	1	1	1	1	1	1	1	2	1	2	1	1	1	1	1	1	1	1	1	1	2	1	1	1	1	1	1	2	1	2	1
OG0000465	3	3	3	3	3	1	3	0	0	1	1	1	0	1	0	1	1	1	4	0	1	0	3	1	0	4	0	1	0	0	2	0	2	0	0	1	2	0	0	1	2	0	3	1	1	1	0	0	0
OG0000466	2	2	1	2	1	1	1	1	1	2	1	1	0	2	1	1	1	0	2	1	2	1	2	1	1	2	1	2	0	0	3	0	2	1	0	0	1	3	3	3	1	3	1	2	2	2	2	1	1
OG0000467	1	1	1	0	0	4	1	1	0	2	4	1	1	1	1	1	6	0	1	2	3	0	0	0	1	1	0	1	1	2	1	1	1	0	2	3	3	0	3	2	0	0	2	3	2	2	1	0	1
OG0000468	1	0	1	1	1	1	0	1	1	2	1	2	2	1	1	1	1	0	1	1	2	1	1	1	2	2	1	1	2	1	1	2	1	1	1	3	3	1	1	2	2	0	1	2	2	2	1	1	1
OG0000469	2	2	3	1	2	2	2	1	1	2	2	1	1	1	2	1	2	1	3	1	1	0	3	2	1	2	1	1	1	1	3	1	2	1	1	1	1	1	1	2	1	1	2	1	2	1	2	1	1
OG0000470	3	1	2	0	0	1	2	1	0	4	1	2	1	1	2	3	2	0	3	1	2	0	1	0	0	3	1	2	2	2	0	0	1	0	0	0	0	1	0	2	0	3	1	1	2	0	2	0	0
OG0000471	1	2	1	1	2	2	1	1	2	2	2	1	1	2	1	2	1	0	2	0	2	1	1	1	1	2	1	2	1	1	2	1	2	1	1	1	1	1	2	2	2	1	1	2	2	2	1	2	1
OG0000472	7	0	0	0	0	3	0	0	0	2	0	2	0	0	8	0	3	0	0	0	2	0	0	2	0	0	0	7	0	0	0	0	0	0	17	0	0	2	0	1	2	0	10	2	1	3	0	0	0
OG0000473	3	1	2	1	2	1	3	0	2	2	2	2	0	2	2	0	2	10	3	0	2	0	2	0	0	2	0	1	0	0	0	0	4	0	3	0	0	3	1	2	2	5	1	2	1	3	0	1	0
OG0000474	0	0	0	2	0	2	0	1	0	4	0	3	1	1	0	1	3	0	1	0	6	0	0	0	0	1	0	1	1	1	0	1	0	0	0	0	0	1	0	2	3	1	0	7	1	2	0	1	0
OG0000475	2	2	1	1	3	1	1	1	1	1	2	2	1	2	2	2	1	1	2	1	1	1	2	1	1	2	1	1	1	0	1	1	1	1	3	1	1	1	1	1	1	2	3	1	1	2	1	1	1
OG0000476	2	1	1	1	2	2	2	1	0	2	2	2	1	1	1	1	3	0	2	0	2	1	2	1	0	2	1	3	1	1	1	1	0	1	1	0	0	1	3	1	2	1	2	2	1	5	1	0	0
OG0000477	2	2	2	0	2	1	2	1	1	2	2	1	1	1	1	1	1	0	2	1	2	0	2	1	1	2	1	1	1	1	2	1	1	1	1	1	1	1	2	1	2	1	2	2	1	1	1	1	1
OG0000478	2	2	2	2	1	2	2	0	1	2	2	0	1	1	2	2	0	0	2	1	2	1	2	1	2	2	0	2	1	1	2	1	2	1	2	0	0	1	2	2	2	3	1	2	2	1	1	1	2
OG0000479	1	1	2	2	2	2	2	1	0	2	1	2	1	1	1	1	1	0	2	1	0	0	2	0	1	1	2	2	1	1	3	0	2	2	0	1	1	1	1	2	2	1	1	0	2	1	1	0	1
OG0000480	0	3	3	2	2	1	3	1	2	2	2	0	2	0	0	2	1	0	3	2	1	0	2	1	1	2	0	2	2	1	3	1	2	0	0	0	0	1	2	2	1	1	1	2	1	1	1	2	2
OG0000481	1	1	1	1	1	1	1	1	2	2	1	1	1	1	1	1	1	3	1	2	1	1	0	1	1	1	1	1	1	1	1	1	1	2	2	3	3	2	2	1	1	2	1	1	1	2	2	2	1
OG0000482	3	2	2	1	1	1	2	1	1	2	2	2	1	1	1	1	2	2	2	1	2	0	0	2	1	2	1	1	1	1	1	1	1	1	1	1	1	1	1	1	2	1	1	2	1	2	1	1	2
OG0000483	1	4	4	2	3	1	4	1	2	0	4	1	1	2	2	1	1	3	2	1	1	2	4	1	0	4	0	0	1	1	4	1	3	2	3	0	0	2	2	1	0	3	2	1	0	1	2	2	0
OG0000484	1	2	1	2	2	2	1	1	2	2	2	0	1	1	0	1	2	0	2	0	2	1	1	1	0	2	1	1	1	0	2	0	2	1	0	2	2	2	2	2	2	1	2	2	2	2	1	2	1
OG0000485	1	5	1	0	2	2	0	0	0	2	0	2	0	0	1	0	3	0	5	0	6	0	2	1	0	4	0	2	0	0	0	0	0	0	0	0	0	5	0	3	2	1	0	5	4	3	1	0	1
OG0000486	1	1	1	1	1	4	1	1	1	2	1	1	1	1	1	0	1	1	2	1	2	0	1	1	1	1	1	2	0	0	1	0	0	1	1	1	1	1	2	2	2	1	1	2	2	2	1	1	1
OG0000487	4	1	3	1	0	3	2	0	1	2	0	0	0	0	3	1	3	1	2	0	1	1	0	0	0	2	0	4	0	0	0	0	1	1	3	0	0	3	1	2	1	2	2	1	4	6	0	1	2
OG0000488	1	2	2	2	1	2	2	1	1	2	1	1	1	1	1	1	1	0	1	2	1	1	1	1	1	2	0	2	1	1	1	1	1	1	1	1	1	1	1	1	2	2	1	1	1	2	1	1	1
OG0000489	3	2	1	1	1	1	0	1	1	1	1	1	2	3	1	2	1	0	1	1	1	2	1	2	1	1	1	1	2	2	4	2	1	2	1	1	1	1	1	1	1	1	3	1	1	1	2	1	1
OG0000490	1	1	0	3	4	1	0	4	2	1	7	1	0	2	0	1	0	0	11	6	0	0	0	0	0	2	0	2	0	1	0	0	0	0	2	0	0	16	1	2	3	2	0	2	0	0	0	0	0
OG0000491	2	2	3	2	2	1	3	1	1	2	1	1	1	1	0	1	1	3	1	1	2	0	1	1	0	2	0	1	1	1	1	1	1	1	1	1	1	1	1	1	2	0	1	2	2	1	1	1	1
OG0000492	3	3	3	1	3	1	3	1	1	1	3	0	2	2	1	2	1	0	3	0	1	0	3	2	3	3	2	1	2	3	1	2	1	1	1	1	1	1	1	1	1	1	4	1	1	1	1	1	3
OG0000493	1	2	2	5	2	1	2	0	3	1	3	0	1	2	1	1	1	0	3	0	0	0	1	1	2	2	1	1	1	1	4	2	1	0	3	1	1	1	0	1	0	1	1	1	1	1	0	2	2
OG0000494	1	1	1	1	1	2	1	0	1	2	1	2	1	1	1	1	2	0	1	1	3	1	2	1	1	1	3	2	2	1	2	1	2	1	2	2	2	1	0	2	2	1	1	2	1	2	1	1	1
OG0000495	0	1	1	0	0	1	0	0	1	1	1	1	1	1	3	5	1	0	7	0	1	1	0	0	0	0	1	8	2	1	0	1	1	0	0	0	0	1	4	3	1	0	0	4	2	1	0	1	0
OG0000496	2	1	1	1	1	1	0	1	2	1	1	0	2	2	2	2	1	1	1	2	1	0	1	2	2	1	2	1	2	2	1	2	1	2	1	1	1	1	2	1	1	1	2	1	1	1	2	2	2
OG0000497	2	3	2	2	0	2	1	0	1	3	2	1	1	1	0	1	2	0	3	1	2	0	0	1	1	3	0	1	1	1	1	1	1	2	1	1	2	0	2	2	2	0	2	2	2	2	2	1	1
OG0000498	2	2	2	1	2	1	1	1	2	1	2	0	1	1	1	1	1	2	2	1	1	1	2	1	0	2	1	1	1	1	1	1	2	2	1	1	1	9	2	1	1	7	2	1	1	1	2	2	1
OG0000499	2	3	3	0	1	0	3	1	2	2	2	1	1	1	1	1	0	0	2	1	2	2	1	1	1	3	0	0	1	1	2	1	1	1	5	1	1	4	1	1	1	5	1	2	1	0	1	2	2
OG0000500	2	2	2	1	1	3	2	0	0	2	2	0	1	2	2	2	2	0	2	0	2	0	1	1	3	2	0	3	2	2	0	2	1	0	0	1	0	0	0	3	2	0	3	2	3	2	0	0	4
OG0000501	1	2	3	1	1	1	1	0	0	2	1	0	0	1	1	0	17	0	5	0	2	2	0	0	0	2	0	8	0	0	1	0	2	2	0	0	0	0	1	3	0	1	1	1	4	8	2	0	1
OG0000502	1	2	2	2	1	2	1	1	1	2	2	0	0	1	1	1	1	1	2	1	1	1	1	0	1	2	1	2	1	1	2	0	1	1	2	1	1	2	1	2	2	2	1	1	1	1	1	1	1
OG0000503	3	3	2	1	1	1	3	1	1	2	2	0	1	2	1	1	2	0	2	1	1	0	2	1	2	3	1	2	1	1	3	1	1	1	1	1	1	5	1	1	1	1	1	1	1	2	1	1	2
OG0000504	1	3	1	1	1	2	2	0	2	2	2	1	2	1	1	2	1	0	2	1	1	0	1	1	2	4	1	1	2	2	2	3	1	1	1	1	1	1	2	1	1	2	1	1	1	1	1	2	2
OG0000505	2	1	0	0	2	3	1	1	1	2	1	1	0	0	0	1	7	1	1	0	2	0	0	1	2	2	0	0	0	0	1	1	0	3	0	0	0	3	4	0	2	1	2	3	1	7	2	0	2
OG0000506	1	2	2	1	1	2	2	1	1	2	2	1	1	1	2	2	2	0	1	1	1	1	1	1	2	2	1	1	1	0	2	1	1	1	1	1	1	4	1	1	1	2	1	3	1	1	1	1	2
OG0000507	1	2	2	3	1	2	2	1	1	2	2	1	1	1	1	1	2	2	2	2	2	0	1	2	0	2	1	2	1	1	1	1	0	0	2	0	0	2	1	3	1	0	1	2	2	2	0	1	1
OG0000508	2	2	1	1	1	1	1	0	2	2	2	0	1	1	1	1	2	2	1	1	1	0	1	1	1	2	1	2	1	1	1	1	1	1	0	1	1	2	2	1	2	2	2	1	1	1	0	2	1
OG0000509	2	1	1	1	1	2	1	1	1	2	1	0	0	0	1	0	0	0	2	1	2	2	1	1	0	1	0	2	0	0	0	0	1	2	1	1	1	1	2	2	2	1	3	2	2	0	2	1	0
OG0000510	1	1	1	2	1	2	2	1	1	1	1	0	1	2	1	1	1	5	1	1	1	1	2	1	1	2	0	1	1	2	1	0	2	2	2	3	1	1	1	1	1	1	1	1	1	1	1	1	1
OG0000511	1	1	1	1	1	1	1	2	1	2	1	1	1	1	1	1	1	2	1	2	2	0	1	1	1	1	2	1	1	1	2	1	1	1	2	1	1	1	2	1	2	1	1	2	1	1	2	1	1
OG0000512	2	2	1	1	2	1	1	1	1	1	2	0	1	1	2	1	1	0	3	2	1	0	1	2	1	2	1	1	1	0	3	1	3	1	1	1	1	2	1	1	1	5	2	1	1	1	1	1	2
OG0000513	0	7	4	2	4	0	2	0	2	1	5	0	0	0	2	1	0	0	2	0	0	0	3	1	0	5	0	0	1	1	2	0	0	0	4	2	0	1	3	0	0	1	1	0	0	1	6	1	2
OG0000514	0	3	2	0	4	3	2	0	2	1	2	2	2	0	0	1	0	0	3	1	4	0	4	1	0	3	0	0	0	0	1	0	1	1	0	1	1	0	0	1	1	1	0	2	0	0	0	2	2
OG0000515	1	1	1	1	1	1	0	1	1	3	2	1	1	1	1	1	2	0	1	1	2	1	1	1	2	1	0	2	1	1	1	1	1	1	1	2	2	1	1	1	2	1	1	3	1	2	1	1	1
OG0000516	2	1	1	2	1	2	2	1	1	1	2	0	1	2	1	1	2	0	1	1	2	0	1	1	2	1	2	2	1	1	1	1	1	1	2	0	0	1	2	2	2	1	2	2	2	2	1	1	2
OG0000517	0	3	0	0	0	3	2	0	2	3	2	3	1	1	0	0	0	0	2	1	1	0	0	0	0	3	1	3	0	1	0	0	1	0	0	0	0	4	2	2	0	4	0	1	3	3	0	0	2
OG0000518	3	2	1	2	2	1	2	0	2	2	1	2	0	1	3	0	2	0	5	0	1	0	2	0	0	2	0	2	0	0	3	0	1	0	2	0	0	1	2	2	1	1	4	2	3	3	0	2	1
OG0000519	1	2	2	2	1	2	1	1	1	2	2	1	1	2	1	1	2	1	1	1	2	0	1	1	1	2	0	1	1	1	1	1	1	1	1	1	1	2	1	1	1	2	1	2	1	2	1	1	1
OG0000520	1	2	2	1	2	1	2	1	2	1	1	1	1	1	1	1	1	2	2	1	1	1	2	1	1	2	1	1	1	1	1	1	1	2	2	2	2	2	1	1	1	2	1	1	1	1	2	2	1
OG0000521	1	1	1	1	1	2	1	1	1	1	1	1	1	1	1	0	1	0	2	0	2	0	0	1	1	1	0	2	1	1	0	2	1	1	1	2	1	1	1	2	2	1	1	2	2	1	2	1	2
OG0000522	3	1	1	1	1	3	2	1	2	2	2	1	1	2	1	1	2	1	1	1	1	1	1	1	1	1	1	1	1	1	2	1	2	1	1	1	1	3	1	3	1	2	2	1	2	2	1	2	2
OG0000523	1	4	3	2	3	1	2	2	1	1	3	0	1	1	1	1	1	0	5	0	1	0	3	1	1	4	1	1	1	1	1	1	3	0	1	1	3	0	1	1	1	0	1	1	1	1	0	1	1
OG0000524	2	2	2	1	2	2	2	1	2	2	1	0	1	1	2	2	1	0	2	0	1	1	1	2	2	2	1	1	1	1	2	1	2	0	1	1	1	2	2	0	1	2	2	1	1	3	1	2	2
OG0000525	0	2	0	1	1	4	0	0	3	2	1	2	1	2	2	1	3	0	2	0	2	0	0	0	0	2	0	2	1	1	1	1	0	0	0	2	2	0	2	4	2	0	2	5	2	2	0	3	0
OG0000526	1	2	2	1	1	2	1	0	1	1	2	1	1	1	2	1	3	0	3	1	2	0	1	1	2	2	0	2	1	1	0	0	1	0	0	0	0	0	1	2	2	1	1	2	2	3	0	1	2
OG0000527	4	2	1	2	3	1	1	0	1	1	2	0	1	1	2	1	2	0	3	0	1	0	3	1	1	2	1	1	1	1	1	1	2	1	2	0	0	1	2	1	1	1	4	1	1	2	1	1	1
OG0000528	1	1	1	2	1	1	1	1	2	4	2	1	1	0	1	1	3	0	1	0	2	0	1	1	0	1	0	2	1	0	0	0	0	0	0	0	0	0	1	3	3	0	2	2	3	3	1	2	0
OG0000529	2	2	2	2	0	2	2	0	3	4	0	2	1	1	1	0	2	0	3	0	3	0	0	1	0	3	0	1	1	1	1	1	0	0	2	0	0	0	1	1	3	0	1	3	1	3	0	3	1
OG0000530	1	2	2	2	2	3	2	0	1	3	1	0	0	0	2	1	2	0	2	0	3	0	2	1	1	2	0	3	0	1	1	1	1	0	0	0	0	1	1	2	2	1	1	3	1	4	0	1	2
OG0000531	1	1	1	1	1	1	1	1	1	1	1	1	1	1	1	1	3	1	1	1	3	0	1	1	1	1	0	2	2	1	2	1	1	1	1	1	1	1	1	3	1	1	1	1	2	3	1	1	1
OG0000532	1	1	1	0	0	4	1	1	0	2	2	1	3	2	1	2	2	0	2	0	0	0	1	2	2	1	2	1	2	2	0	2	0	0	0	0	0	0	1	4	2	1	1	1	2	2	0	0	4
OG0000533	2	1	1	1	2	1	1	1	2	1	1	1	2	2	1	2	1	1	1	2	1	1	2	1	1	1	2	1	2	2	2	2	2	2	1	1	1	1	2	1	1	1	3	1	1	1	1	2	0
OG0000534	2	4	1	3	1	1	1	1	2	2	2	1	1	1	1	1	2	2	2	1	0	1	1	1	1	6	1	2	1	1	1	1	1	1	0	1	1	2	1	1	1	5	2	1	1	3	0	1	2
OG0000535	1	2	1	2	1	1	0	1	2	3	2	0	1	1	1	1	1	0	1	1	1	1	1	1	1	2	1	1	1	1	3	0	1	1	2	1	1	1	1	1	2	1	2	1	1	1	1	2	1
OG0000536	2	2	3	1	1	1	3	0	1	3	3	1	1	0	0	0	1	1	2	0	2	0	1	2	0	2	0	1	1	1	1	2	1	0	2	1	1	0	2	2	2	1	0	2	1	2	1	1	2
OG0000537	2	1	1	2	1	2	1	1	1	2	1	1	1	1	1	1	2	0	1	1	1	0	1	1	1	1	1	2	1	1	1	2	1	1	2	1	1	1	1	2	1	1	2	1	2	2	1	1	1
OG0000538	3	1	3	1	0	3	2	0	1	2	0	0	0	0	3	1	3	0	2	0	1	1	0	0	0	2	0	4	0	0	0	0	1	1	3	0	0	2	1	2	1	2	2	1	4	6	0	1	2
OG0000539	2	1	1	0	1	2	1	1	2	2	1	1	0	1	2	1	1	0	1	0	2	1	2	1	1	1	0	2	0	0	1	0	1	1	2	1	2	1	0	2	2	1	2	2	2	1	1	2	1
OG0000540	2	2	1	0	2	2	1	0	0	2	2	0	2	2	2	2	2	0	2	0	2	0	2	1	2	2	2	2	1	2	2	2	1	0	0	0	0	0	0	2	2	0	2	2	2	2	0	0	2
OG0000541	1	2	2	0	1	0	3	1	0	1	0	0	0	1	1	1	1	0	6	1	4	0	2	0	0	3	0	5	0	0	0	0	1	0	1	0	0	4	1	2	0	4	0	8	1	0	0	0	2
OG0000542	1	4	3	3	3	1	1	2	1	1	3	0	1	1	1	1	1	0	4	0	1	0	3	1	1	4	1	1	1	1	1	1	3	0	1	1	2	0	1	1	1	0	1	1	1	1	0	1	1
OG0000543	2	2	1	1	2	1	2	2	1	2	1	1	1	1	1	1	2	0	2	0	1	0	2	2	2	2	1	1	1	1	1	1	2	1	0	2	2	1	1	1	1	1	1	1	1	2	1	1	3
OG0000544	1	4	3	0	0	1	4	0	0	9	0	1	0	0	0	0	0	0	3	0	1	0	2	0	0	4	0	2	0	0	0	0	0	0	0	0	0	0	5	1	1	0	0	2	2	1	0	0	1
OG0000545	2	4	1	1	2	1	2	1	0	2	3	1	0	1	2	0	1	1	4	0	2	0	2	0	1	4	1	1	0	0	1	0	1	1	0	0	0	1	3	2	2	1	1	2	2	2	1	0	0
OG0000546	1	1	1	0	1	3	0	0	3	2	2	0	0	0	1	0	3	0	0	0	3	0	0	1	1	1	0	3	0	0	0	0	0	0	0	0	0	1	0	2	2	1	2	3	4	4	0	3	1
OG0000547	2	4	3	2	0	3	3	0	1	3	0	1	0	0	0	1	3	0	1	0	2	0	0	0	1	6	0	2	0	0	2	0	1	0	0	1	1	3	1	3	2	1	1	3	4	2	0	1	1
OG0000548	1	2	2	1	1	1	2	1	1	2	1	0	1	1	1	0	1	1	2	1	2	1	1	1	1	2	0	2	1	0	1	1	1	1	2	1	1	2	2	1	1	1	1	1	2	1	1	1	1
OG0000549	1	1	1	2	1	2	1	1	1	1	1	0	1	1	1	1	1	1	1	1	1	2	1	2	1	1	1	2	1	2	2	1	1	2	1	1	1	2	2	1	1	2	1	1	1	1	2	1	1
OG0000550	1	1	1	1	1	2	1	1	1	2	1	2	1	1	1	1	2	1	2	1	2	0	1	0	1	1	0	2	1	2	1	1	1	1	1	1	1	1	1	1	1	1	1	3	1	3	1	1	1
OG0000551	1	1	1	1	1	1	1	1	1	1	1	0	1	1	1	1	2	0	1	1	1	2	1	0	1	1	3	1	1	0	0	4	1	2	1	1	1	7	2	1	1	6	1	1	1	1	2	1	1
OG0000552	2	1	1	1	2	1	1	1	1	1	1	1	1	1	2	1	1	1	1	1	1	1	2	1	2	1	0	2	1	1	1	1	2	1	1	1	1	1	1	1	1	1	2	1	1	1	1	1	1
OG0000553	1	2	1	1	1	1	2	1	1	2	1	0	1	2	2	2	1	3	4	1	1	0	1	1	1	2	1	2	1	1	2	1	0	1	2	0	0	2	0	3	1	2	1	2	1	1	1	1	1
OG0000554	1	1	2	1	1	2	1	0	1	1	1	2	2	1	1	2	1	0	2	1	1	1	1	0	1	1	1	2	2	2	1	2	1	1	1	1	1	1	1	1	2	1	2	2	1	1	2	1	2
OG0000555	1	1	1	0	2	3	2	0	1	1	2	2	2	2	0	2	1	0	6	1	2	0	1	0	3	2	1	2	2	1	0	1	0	0	0	1	1	0	2	1	2	0	1	2	1	2	0	1	3
OG0000556	1	1	1	1	1	1	1	1	2	2	1	0	1	1	1	1	1	0	1	1	2	0	1	1	1	1	1	1	1	1	1	1	1	1	1	1	1	2	1	2	2	2	1	2	2	1	1	2	1
OG0000557	2	3	3	0	2	1	2	1	2	1	3	1	1	1	1	1	1	0	3	1	2	0	1	1	1	3	1	1	1	1	2	2	2	0	0	0	0	2	2	1	1	2	2	1	1	1	0	2	1
OG0000558	1	1	0	0	0	4	0	0	0	3	0	2	0	0	1	0	3	0	0	0	4	0	0	0	0	0	0	2	0	0	0	0	0	0	1	0	0	0	0	4	2	1	0	4	2	4	0	0	0
OG0000559	2	2	2	1	1	1	2	0	1	1	2	1	2	2	1	2	1	0	2	1	2	0	1	1	1	2	1	2	1	2	1	1	1	1	2	0	0	2	1	1	1	3	1	2	2	1	1	1	2
OG0000560	0	3	1	1	1	1	1	1	1	2	1	1	1	1	1	1	1	2	2	1	1	1	1	1	1	3	1	2	1	1	1	1	1	1	1	1	1	2	1	1	1	1	1	1	1	2	1	1	2
OG0000561	3	3	3	1	1	1	3	1	1	1	3	0	1	2	1	2	1	1	3	1	1	0	1	2	1	3	1	1	1	1	1	1	1	1	2	2	2	1	1	1	1	1	1	0	1	1	1	1	1
OG0000562	1	1	0	1	1	1	0	1	2	2	1	1	1	1	1	1	1	0	1	1	1	1	1	1	1	1	1	1	1	1	1	2	1	1	0	1	1	1	1	1	1	1	1	1	3	2	1	2	2
OG0000563	1	1	2	2	1	2	1	1	1	2	2	0	1	1	2	1	1	1	3	1	1	1	1	1	1	0	2	2	1	1	1	1	1	1	1	1	0	1	1	2	1	1	1	1	2	2	1	1	2
OG0000564	2	1	1	1	1	1	1	1	1	1	1	1	1	1	2	2	2	1	1	1	3	1	1	1	1	2	1	1	1	1	1	1	1	1	1	1	1	1	1	2	1	1	1	2	1	1	1	1	1
OG0000565	1	3	3	1	2	1	3	1	1	1	2	1	1	1	1	1	1	0	2	1	1	1	1	1	2	3	0	1	1	0	1	1	1	1	0	1	1	1	1	2	1	1	1	1	2	1	1	1	2
OG0000566	1	1	1	1	1	1	1	1	1	2	2	2	1	1	1	1	2	0	1	1	2	1	1	1	1	0	1	1	1	1	1	1	1	1	0	1	1	1	1	1	2	1	1	2	1	2	1	1	1
OG0000567	1	2	0	0	0	3	0	0	0	0	0	0	2	2	0	0	5	0	0	1	1	0	0	0	0	2	0	2	2	4	0	0	0	0	1	0	0	0	2	1	0	1	0	2	7	1	0	0	10
OG0000568	3	2	0	0	1	1	2	1	1	2	1	1	1	1	0	1	1	1	2	1	2	1	1	1	1	1	0	0	1	1	1	1	1	1	1	0	0	4	1	2	1	2	1	2	1	3	1	1	1
OG0000569	3	2	0	2	0	1	2	0	3	1	0	0	1	0	1	2	1	1	2	1	0	0	0	0	2	2	0	0	0	0	0	0	1	0	4	0	0	1	2	0	0	1	0	0	3	3	3	2	2
OG0000570	1	2	2	0	1	3	2	0	2	0	2	1	1	1	3	2	2	2	3	1	2	0	1	1	0	2	0	1	1	0	1	1	1	1	7	1	1	1	1	0	0	2	2	1	0	2	1	2	1
OG0000571	1	1	1	1	1	1	0	1	2	2	2	1	1	1	1	1	1	0	1	1	1	1	1	1	1	1	1	1	1	0	1	1	1	1	1	1	1	2	2	2	2	2	1	1	2	2	1	2	1
OG0000572	1	1	1	1	1	1	0	1	2	1	1	1	1	2	1	2	2	2	1	1	1	1	1	2	3	1	1	1	1	1	2	1	2	1	1	1	1	2	1	1	1	2	1	1	1	1	1	2	1
OG0000573	2	2	1	1	1	1	1	1	1	2	1	0	1	1	1	1	1	1	3	0	3	0	1	1	1	2	1	4	1	1	1	1	1	1	1	1	1	1	2	2	1	1	1	2	1	1	1	1	1
OG0000574	1	1	1	1	1	1	1	1	1	1	1	1	1	1	3	1	2	2	1	1	1	0	1	1	1	1	1	1	1	1	1	1	1	1	4	2	1	2	1	1	1	2	1	1	1	1	2	1	1
OG0000575	1	1	1	1	1	2	1	0	1	1	1	0	2	2	1	2	1	0	1	1	1	0	1	2	2	2	2	2	3	2	1	2	1	1	0	2	2	2	1	1	1	2	1	1	1	1	1	1	2
OG0000576	0	0	0	1	1	1	0	1	2	3	0	2	1	1	1	1	1	0	0	1	1	1	1	2	1	0	0	2	1	1	1	0	1	1	0	1	1	1	1	2	1	1	1	3	2	1	1	2	1
OG0000577	2	2	1	1	2	1	1	1	1	2	2	0	1	1	2	1	1	0	2	1	1	0	1	1	1	2	0	1	1	1	2	1	2	1	0	1	1	1	1	2	1	1	2	1	2	1	1	1	1
OG0000578	2	3	1	4	1	2	3	0	1	2	0	0	1	0	2	0	1	0	1	0	2	0	0	1	1	2	0	3	1	2	2	1	1	0	0	0	0	4	1	2	1	4	1	2	1	1	1	1	2
OG0000579	1	1	1	1	2	2	1	0	2	1	1	1	2	1	1	2	2	0	1	1	1	0	2	2	1	1	1	2	2	2	2	3	1	1	3	1	1	0	1	2	1	0	1	1	1	2	1	2	1
OG0000580	1	1	1	1	1	1	0	1	1	1	1	2	1	1	1	1	2	1	2	1	1	1	1	1	2	1	1	1	1	1	1	2	1	1	0	1	1	2	2	2	1	2	1	2	1	1	1	1	2
OG0000581	0	3	1	1	2	0	1	1	1	2	1	0	4	4	1	4	0	0	5	2	2	0	2	1	3	3	2	2	0	3	1	0	1	2	1	1	1	2	1	1	2	2	2	1	1	1	1	2	2
OG0000582	1	1	1	0	2	1	1	2	4	1	1	2	1	1	1	2	1	1	2	1	0	1	2	1	2	1	2	1	1	1	1	0	1	1	2	1	1	1	1	1	1	1	1	1	1	1	1	4	1
OG0000583	2	1	1	0	1	3	1	0	1	2	1	2	1	2	2	1	3	0	1	1	0	1	0	1	2	1	1	3	1	1	1	1	1	1	0	0	0	1	2	2	1	1	2	2	2	2	1	1	2
OG0000584	1	1	1	1	1	1	1	1	1	1	1	0	2	1	2	2	2	0	1	0	1	0	0	1	1	1	1	1	2	2	2	1	1	2	2	1	1	1	2	1	1	1	1	1	2	1	1	1	1
OG0000585	2	1	2	1	1	2	2	1	1	1	1	0	1	1	1	1	1	0	2	2	1	1	1	1	2	1	2	1	1	1	1	1	2	1	2	1	1	1	3	1	1	1	1	1	1	2	0	1	2
OG0000586	2	1	2	1	1	1	2	1	1	1	1	1	1	1	1	1	1	0	1	1	1	0	1	1	2	1	1	1	1	1	1	1	2	1	2	1	1	1	3	1	1	1	1	1	1	2	1	1	2
OG0000587	1	0	1	1	1	1	0	1	1	2	1	2	2	1	1	1	1	0	1	1	2	1	1	1	2	3	1	1	2	1	1	2	1	1	1	1	1	1	1	2	2	0	1	2	2	2	1	1	1
OG0000588	1	1	2	1	1	1	1	1	1	1	1	0	1	1	1	0	1	0	1	1	1	1	1	1	2	1	1	1	1	0	1	1	2	1	2	1	1	1	3	1	1	1	1	1	1	3	2	1	3
OG0000589	0	1	1	0	1	2	1	0	3	2	1	1	1	2	2	1	6	0	2	0	2	0	1	1	2	0	1	2	1	1	2	1	3	0	0	0	0	3	1	2	1	3	1	2	2	2	0	3	1
OG0000590	3	2	0	3	0	0	0	0	1	3	0	2	2	0	0	0	1	0	0	0	3	0	1	2	0	2	0	0	1	0	1	0	0	0	0	0	0	0	0	2	2	0	0	3	4	1	0	1	0
OG0000591	1	1	1	0	1	2	1	1	1	2	1	0	1	1	1	1	1	1	1	1	2	1	1	1	1	1	1	1	1	1	2	1	1	1	1	1	1	1	1	1	2	1	1	2	1	1	1	1	1
OG0000592	1	1	1	1	1	1	2	1	1	1	2	1	1	1	1	1	1	1	1	1	1	1	1	1	1	2	1	1	1	1	1	1	2	1	1	2	2	1	1	1	1	1	1	1	1	1	1	1	1
OG0000593	1	1	1	1	1	2	1	1	1	2	1	1	1	1	1	1	2	1	1	1	2	0	1	1	0	1	1	2	1	1	1	1	1	1	1	2	1	1	1	1	1	1	1	3	1	3	1	1	1
OG0000594	0	1	1	1	1	5	1	0	2	3	1	0	1	1	2	1	3	0	1	1	2	0	1	1	1	1	1	4	1	1	1	1	0	0	0	0	0	1	1	1	1	1	0	1	2	4	0	2	1
OG0000595	0	0	0	1	0	2	0	0	0	0	2	2	0	0	0	1	1	0	2	10	1	0	0	0	0	0	0	10	0	0	0	0	0	0	1	0	0	3	0	0	1	0	0	10	1	0	0	0	0
OG0000596	2	1	1	2	1	1	1	1	2	1	1	0	1	1	1	2	1	1	1	1	1	0	1	2	1	1	2	1	1	1	2	1	2	1	1	1	1	2	1	1	1	2	2	1	1	1	1	2	1
OG0000597	1	1	1	1	1	2	1	2	1	2	1	1	1	1	1	1	2	4	1	1	1	0	1	0	1	1	1	2	1	1	2	0	1	1	1	1	1	1	2	1	1	1	1	1	2	2	1	1	1
OG0000598	1	1	1	1	1	2	0	1	1	2	1	0	1	1	1	1	3	1	1	1	2	0	1	1	1	1	1	2	1	1	1	1	1	1	1	1	1	1	1	2	1	0	1	3	2	3	1	1	1
OG0000599	1	1	1	0	1	1	1	1	1	1	1	1	1	1	2	3	1	4	1	1	1	1	1	1	1	1	3	1	1	1	1	1	1	1	1	1	1	1	3	1	1	3	1	1	1	2	2	1	1
OG0000600	1	1	1	0	1	1	1	2	1	1	1	2	1	1	2	1	1	0	1	1	0	1	2	1	1	1	1	1	1	1	1	1	1	2	2	1	1	2	2	1	1	3	1	1	1	1	2	1	1
OG0000601	2	1	1	1	1	1	1	1	1	1	1	0	1	2	2	2	2	1	1	1	2	1	1	1	1	1	1	2	1	2	1	1	1	1	1	1	1	1	1	1	1	1	2	1	2	2	1	1	2
OG0000602	1	1	1	1	1	1	1	0	1	1	2	1	2	0	1	1	1	1	3	3	1	1	1	1	2	1	0	1	2	2	1	1	1	1	0	0	0	1	2	4	1	1	1	2	2	1	1	1	3
OG0000603	1	4	1	1	1	1	1	0	0	2	2	1	2	2	1	2	1	0	3	0	2	0	1	3	1	3	1	1	2	0	1	1	1	0	1	0	0	1	2	1	1	1	1	2	3	3	0	0	1
OG0000604	0	2	1	0	1	2	1	0	2	1	1	1	0	0	1	0	3	0	1	0	3	0	0	0	2	2	0	5	0	0	0	0	1	0	2	0	0	3	2	1	2	2	0	3	1	3	0	2	0
OG0000605	2	2	2	1	1	1	1	1	1	1	2	0	1	1	1	1	1	1	2	1	1	0	1	1	1	2	1	1	1	1	2	1	2	1	1	0	0	2	1	1	1	2	2	1	1	1	1	1	1
OG0000606	1	1	1	1	1	1	1	0	1	1	1	0	1	1	1	1	1	0	1	2	1	1	2	1	1	1	1	1	1	1	1	1	1	1	1	1	1	5	2	1	1	3	1	1	1	1	1	1	1
OG0000607	2	1	1	1	2	1	1	1	1	1	1	0	2	1	2	1	1	4	1	1	1	1	2	2	1	1	1	1	2	2	2	2	1	1	2	1	1	2	2	1	1	2	1	1	1	1	1	1	1
OG0000608	1	1	1	1	1	1	1	1	1	1	1	1	1	1	2	1	1	0	1	1	3	1	1	1	1	2	0	1	1	1	1	0	1	1	1	1	1	1	1	2	1	1	1	2	1	1	1	1	1
OG0000609	1	1	0	1	1	1	0	1	2	1	1	1	1	1	1	1	3	0	1	2	1	0	1	2	1	1	1	2	1	1	1	1	1	1	1	1	1	1	1	2	1	2	1	2	2	1	1	2	1
OG0000610	1	1	1	1	2	1	1	1	1	1	1	0	1	2	1	2	1	0	1	3	2	1	2	2	1	1	2	1	1	0	1	1	1	1	2	1	1	2	1	1	1	2	1	2	1	1	1	1	2
OG0000611	0	3	1	1	0	0	1	1	0	4	0	0	6	0	2	2	0	1	3	0	1	0	0	1	3	2	0	0	5	2	3	1	0	0	1	0	0	1	2	3	1	3	2	3	1	1	1	0	6
OG0000612	0	1	1	2	0	3	1	0	1	1	0	1	1	1	0	1	0	1	0	1	1	0	0	0	1	1	1	2	0	1	1	0	2	0	2	1	1	3	1	4	3	2	1	1	3	1	0	1	1
OG0000613	0	1	2	3	1	3	0	0	1	5	1	1	0	0	0	0	1	0	0	0	3	0	1	0	1	1	0	2	0	0	3	0	0	0	0	0	0	0	0	2	2	0	0	5	2	2	1	1	1
OG0000614	1	1	1	1	1	1	1	1	2	1	1	1	1	2	1	2	2	1	1	1	1	1	1	2	3	1	1	1	1	1	2	0	2	1	1	1	1	2	1	1	1	2	1	1	1	1	1	2	1
OG0000615	1	1	1	1	1	1	1	1	1	2	1	1	1	1	1	1	1	0	1	1	2	0	1	1	1	1	1	1	1	0	1	1	1	1	2	1	1	2	1	2	2	2	1	3	1	1	1	1	1
OG0000616	1	1	1	1	1	1	1	1	1	1	1	2	1	1	1	1	1	0	1	1	1	0	1	1	1	1	1	1	1	1	1	1	1	1	1	1	1	1	1	2	2	1	1	1	2	1	1	1	1
OG0000617	1	1	1	1	1	2	1	1	1	2	1	0	1	1	1	1	2	1	1	1	2	1	1	1	1	1	1	1	1	1	1	1	1	1	1	1	1	1	1	2	1	1	1	2	2	2	1	1	1
OG0000618	1	2	1	1	1	1	1	1	1	1	1	0	1	1	1	1	2	0	2	1	2	0	1	1	1	2	1	1	1	1	1	1	1	1	1	1	0	1	1	1	1	1	1	2	1	2	1	1	1
OG0000619	1	0	1	0	0	2	1	0	3	2	0	0	2	3	1	3	2	0	1	1	2	0	0	2	2	0	1	2	2	2	0	2	0	0	0	0	0	0	0	2	2	0	0	2	2	3	0	3	3
OG0000620	1	1	1	2	0	1	0	1	2	2	1	1	2	2	1	2	1	1	2	1	1	1	0	1	1	1	1	1	2	1	1	2	1	1	0	0	1	2	2	1	2	2	1	1	1	0	1	2	1
OG0000621	1	2	1	1	1	2	2	1	1	3	1	0	0	1	2	2	2	0	1	0	1	0	1	1	1	2	1	2	0	0	1	0	1	0	1	0	0	1	1	2	1	2	1	1	3	4	1	1	2
OG0000622	2	2	0	2	0	1	2	1	3	4	0	1	1	0	0	0	2	1	2	0	1	0	0	0	1	2	0	1	1	1	1	1	0	0	3	2	2	0	2	2	1	0	3	1	1	2	0	3	1
OG0000623	1	1	1	2	1	1	0	1	1	2	1	0	1	1	2	1	1	1	1	1	1	1	1	1	2	1	1	1	1	1	1	1	1	1	1	1	1	1	1	2	1	1	1	1	2	1	1	1	2
OG0000624	2	1	1	2	1	2	2	0	1	2	1	0	1	2	3	1	2	1	1	0	1	1	0	1	1	1	0	2	1	1	1	1	1	1	0	0	0	1	1	2	1	1	2	1	2	2	1	1	1
OG0000625	1	2	1	0	1	1	0	1	2	2	2	0	1	1	1	1	1	0	1	1	1	1	1	0	1	2	1	1	1	1	2	1	1	1	1	1	1	1	1	1	2	1	2	1	1	1	1	2	1
OG0000626	1	2	1	0	1	1	1	1	2	2	2	2	1	1	1	1	1	0	1	1	1	1	1	1	1	2	1	1	1	1	2	1	1	1	1	1	1	1	1	1	2	0	2	1	1	1	1	2	1
OG0000627	0	1	1	0	0	0	2	3	2	0	3	0	7	10	0	6	0	0	3	2	0	0	0	1	4	1	5	0	4	4	0	5	0	0	3	0	0	3	3	0	0	2	0	0	0	1	0	2	3
OG0000628	0	1	2	0	0	0	0	0	2	4	0	0	0	1	0	1	2	0	15	2	1	0	0	1	0	0	0	25	0	0	0	0	0	0	1	0	0	6	1	1	0	14	0	6	0	2	1	0	0
OG0000629	0	0	0	0	1	2	0	0	4	5	2	1	1	2	0	3	0	0	0	0	3	1	0	0	3	0	3	1	1	1	0	0	0	1	0	0	0	0	2	2	3	0	1	2	4	0	1	4	1
OG0000630	2	1	0	1	0	0	1	0	0	3	0	0	3	2	8	1	2	0	1	2	2	0	1	0	0	1	0	2	0	2	0	1	0	0	0	0	0	5	2	2	0	5	1	2	3	3	0	0	1
OG0000631	2	1	1	0	1	2	1	0	0	1	1	0	1	2	1	2	1	3	1	0	2	0	1	2	1	1	1	1	1	1	1	1	1	0	4	1	1	0	1	2	1	0	2	2	2	1	0	0	2
OG0000632	1	1	1	1	1	1	1	1	2	1	1	0	1	2	1	2	2	1	1	1	1	0	1	2	3	1	1	1	1	1	2	0	2	1	1	1	1	2	1	1	1	2	1	1	1	1	1	2	1
OG0000633	2	1	1	1	1	1	1	1	1	1	1	0	1	1	1	1	1	3	2	1	1	1	1	0	1	1	1	1	1	2	1	1	1	1	2	2	3	1	1	1	1	1	2	1	1	1	1	1	1
OG0000634	2	1	1	3	1	1	1	1	1	1	1	0	1	1	1	2	1	0	1	1	1	0	1	1	1	1	2	1	1	1	1	1	2	2	1	1	1	3	3	1	1	1	2	1	1	1	2	1	1
OG0000635	1	2	1	1	1	1	2	1	1	2	1	1	1	1	1	1	1	2	1	1	2	1	0	1	1	2	1	1	1	1	1	1	1	1	1	0	0	1	1	2	1	1	1	2	2	1	1	1	1
OG0000636	2	3	2	1	1	1	2	1	2	1	1	1	1	1	1	1	1	1	3	1	1	1	1	1	1	2	1	1	1	1	1	1	1	1	2	1	1	1	1	1	1	1	1	1	1	1	1	2	1
OG0000637	1	1	1	1	1	1	1	1	2	2	2	0	2	2	1	2	1	0	1	1	1	1	1	1	1	1	2	1	2	0	1	2	1	1	1	1	1	1	1	2	1	1	1	1	2	1	1	2	1
OG0000638	2	1	1	1	1	1	1	1	1	2	1	1	0	1	2	1	1	2	2	0	2	0	1	3	1	1	0	1	0	0	1	0	1	0	1	1	0	1	1	2	2	1	1	2	1	2	1	1	2
OG0000639	1	3	5	0	1	1	4	0	2	1	1	0	1	4	1	2	3	3	2	0	1	0	1	1	2	3	1	2	1	1	2	1	2	0	1	0	0	1	1	2	1	1	1	1	1	2	0	2	4
OG0000640	1	1	1	0	1	1	1	0	2	2	1	2	1	2	1	2	2	0	2	0	1	0	0	2	2	1	1	1	1	1	2	0	2	0	0	0	1	2	1	2	2	2	1	1	1	1	1	2	2
OG0000641	1	1	1	1	1	1	1	1	1	1	1	0	1	1	2	1	1	1	1	1	1	0	1	1	1	2	1	1	1	1	2	1	1	1	1	1	1	7	1	1	1	4	2	1	1	1	1	1	2
OG0000642	2	2	2	1	2	1	2	0	2	1	2	1	1	1	0	1	1	0	2	1	2	0	1	1	1	1	1	1	1	1	3	1	1	0	1	2	2	1	1	1	1	1	2	1	1	1	1	2	1
OG0000643	2	7	4	0	3	0	6	0	2	5	1	0	2	1	0	3	3	0	1	0	1	0	3	0	0	7	0	1	0	0	2	0	0	0	4	0	0	0	1	2	0	2	1	1	3	0	0	1	2
OG0000644	1	2	2	0	3	0	1	0	0	0	6	0	0	0	3	0	0	0	39	0	0	0	1	0	0	65	0	3	0	0	0	0	0	0	0	0	0	1	0	0	0	4	1	0	0	0	0	0	2
OG0000645	1	1	1	1	1	1	1	1	1	1	1	0	1	1	1	1	2	0	1	1	2	0	1	1	0	1	1	1	1	1	1	1	1	1	1	1	1	2	1	2	2	2	1	3	1	1	1	1	1
OG0000646	1	1	0	2	1	1	0	1	2	1	1	0	1	1	0	1	2	2	1	1	1	0	1	1	2	1	2	1	1	1	1	1	1	1	2	1	1	1	1	1	1	1	1	1	1	2	1	2	1
OG0000647	1	2	1	1	1	2	1	1	2	2	0	1	1	1	2	0	0	0	0	1	1	1	1	0	1	2	0	1	1	1	1	1	1	1	5	0	0	3	3	2	1	5	1	1	1	0	2	2	0
OG0000648	2	1	1	1	1	1	1	1	1	1	1	0	1	1	2	1	3	1	1	1	1	1	1	1	1	2	1	1	1	1	2	1	1	1	1	1	1	3	1	1	1	4	2	1	1	1	1	1	1
OG0000649	1	2	0	1	1	1	1	1	2	2	2	1	1	1	1	1	1	0	1	1	1	0	1	1	1	2	1	1	1	1	2	1	0	1	1	2	1	0	1	1	2	0	2	1	1	1	1	2	1
OG0000650	1	1	1	1	1	1	1	1	1	1	1	1	2	1	1	2	1	0	1	1	1	0	1	0	1	1	1	1	2	2	2	4	2	1	1	1	1	1	1	1	1	1	1	1	1	1	1	1	1
OG0000651	1	1	1	1	1	1	2	1	1	1	1	1	1	1	2	1	1	0	1	1	2	1	2	1	1	2	1	1	1	1	2	1	1	1	1	1	1	1	1	2	1	1	2	2	1	1	1	1	1
OG0000652	2	2	2	1	2	1	2	1	1	1	2	0	1	1	2	1	1	1	2	1	1	0	2	1	1	2	1	1	0	1	2	1	2	1	1	1	1	0	1	1	1	1	2	1	1	1	1	1	1
OG0000653	1	3	1	2	1	2	1	0	2	1	2	0	1	1	0	1	0	0	2	1	1	1	0	0	1	1	0	2	1	1	2	1	0	0	1	1	1	1	2	2	2	1	2	1	1	0	1	1	2
OG0000654	1	2	0	2	2	2	4	1	1	0	4	2	0	1	1	0	0	1	2	0	1	3	2	1	0	6	1	0	0	0	0	0	0	0	1	0	1	0	1	1	3	0	2	1	0	0	2	3	0
OG0000655	3	1	1	1	2	1	1	1	0	2	0	0	0	0	2	0	1	0	2	1	2	1	1	0	0	1	1	2	0	1	0	0	1	1	1	1	1	0	2	3	1	0	1	2	1	1	3	0	2
OG0000656	0	2	1	0	0	0	2	0	0	2	0	0	0	1	3	0	0	0	8	1	4	0	0	1	0	1	0	0	0	0	1	0	2	0	1	0	0	0	2	1	0	2	0	2	2	5	1	0	3
OG0000657	1	1	1	1	1	1	1	1	1	2	1	0	1	1	1	1	2	0	1	1	1	1	1	1	1	1	1	1	1	1	1	1	1	1	1	1	1	2	1	2	1	2	1	1	2	2	1	1	1
OG0000658	1	1	1	1	1	1	1	1	1	1	1	1	1	2	1	2	2	1	1	1	1	1	1	2	3	1	1	1	1	1	2	0	2	1	1	1	1	2	1	1	1	2	1	1	1	1	1	1	1
OG0000659	1	1	1	1	1	1	1	1	1	1	1	1	1	1	1	1	1	2	1	1	3	1	0	1	1	1	1	1	1	1	1	1	1	1	2	1	1	1	1	2	1	1	1	2	1	1	1	1	1
OG0000660	1	1	1	1	1	1	0	0	1	2	1	0	1	1	1	1	2	0	1	2	1	1	2	1	2	1	1	2	1	1	1	1	1	1	1	1	1	1	1	2	1	1	1	1	2	2	1	1	1
OG0000661	1	3	0	0	5	0	3	3	1	0	2	0	4	2	3	3	0	2	3	3	0	0	6	4	0	2	1	0	1	1	1	0	1	0	0	0	0	0	4	0	0	0	0	0	0	0	3	0	4
OG0000662	1	2	0	0	1	1	0	1	2	2	2	1	1	1	1	1	1	0	1	1	1	1	1	1	1	2	0	1	1	1	2	1	1	1	1	1	1	1	1	1	2	1	2	1	1	1	1	2	1
OG0000663	1	1	1	0	1	1	0	1	1	1	1	0	1	1	1	1	2	0	1	1	1	1	1	1	1	1	1	1	1	1	1	1	1	1	2	1	1	2	3	2	1	1	1	3	1	1	1	1	1
OG0000664	1	1	0	0	0	1	0	0	0	3	0	0	0	1	2	1	0	1	4	2	1	0	0	0	0	0	3	4	0	0	4	0	1	2	0	0	0	2	2	3	0	3	0	4	1	3	2	0	5
OG0000665	1	1	1	1	1	4	1	2	0	6	0	0	0	0	4	0	1	0	4	0	1	0	1	0	0	1	0	1	0	0	0	0	3	0	0	0	0	2	3	1	3	2	1	1	1	2	0	0	2
OG0000666	2	2	1	1	2	1	1	2	1	1	2	0	1	1	1	1	3	0	2	1	1	1	1	1	1	2	1	1	1	1	1	1	1	1	2	1	1	1	2	1	1	1	2	1	1	1	2	1	1
OG0000667	0	1	3	1	1	3	2	1	1	2	2	1	1	1	2	1	3	0	2	1	1	0	1	1	2	2	0	2	1	2	1	1	1	0	1	0	0	2	1	2	1	2	1	1	2	1	1	1	1
OG0000668	0	0	0	0	0	1	2	0	3	0	0	0	2	12	4	19	0	0	1	0	0	0	0	0	0	0	0	0	4	0	0	0	0	0	0	0	0	0	1	0	0	3	0	0	6	2	4	0	0
OG0000669	1	2	2	0	1	2	2	0	1	3	2	2	2	2	2	2	3	0	2	0	1	0	1	2	2	2	2	2	1	1	3	1	1	1	0	0	0	0	0	1	2	0	1	1	1	2	1	1	2
OG0000670	1	1	1	1	1	2	1	1	1	2	1	0	1	1	1	1	2	0	1	1	2	0	1	1	1	1	1	1	1	1	1	1	1	1	1	1	1	1	1	1	1	1	1	3	1	2	1	1	1
OG0000671	1	1	1	1	1	1	1	1	1	2	1	0	1	1	1	1	1	1	2	1	1	1	1	1	1	1	1	3	1	1	1	1	3	1	1	1	1	1	1	2	1	1	1	1	1	1	1	1	1
OG0000672	1	2	3	3	1	1	3	1	1	2	1	0	1	1	1	1	1	0	2	0	2	0	0	1	1	2	0	1	1	3	1	1	1	0	0	1	1	2	1	1	1	1	1	2	2	2	1	1	1
OG0000673	1	1	1	1	1	1	1	1	1	1	1	0	1	1	1	1	1	3	1	1	1	1	1	1	1	1	0	1	2	1	1	1	1	1	4	1	1	1	1	1	1	1	1	1	1	1	1	1	1
OG0000674	1	0	0	2	1	1	0	2	0	2	1	1	0	1	2	1	0	0	0	0	3	0	1	0	2	0	1	1	0	0	2	0	0	1	1	2	2	0	2	2	2	2	1	2	1	0	0	0	2
OG0000675	2	1	1	0	1	1	1	1	1	1	1	1	1	1	2	1	1	3	1	1	1	1	1	1	1	1	1	2	2	1	1	1	1	1	2	1	1	1	1	1	1	2	1	1	1	1	1	1	2
OG0000676	2	2	2	0	1	0	2	1	1	1	1	2	1	1	1	1	0	0	1	1	2	1	1	1	1	2	1	0	1	1	1	1	1	1	0	1	1	1	2	2	1	1	1	2	2	1	1	1	1
OG0000677	1	1	1	1	1	1	1	1	2	1	1	0	1	2	1	2	1	0	1	1	1	1	1	2	1	1	1	1	1	1	2	1	2	1	0	1	1	1	1	1	1	1	1	1	1	1	1	2	1
OG0000678	1	1	1	1	1	2	2	1	1	1	1	0	1	1	0	1	2	0	2	1	3	1	1	0	1	1	0	1	1	1	1	1	1	1	1	1	1	1	2	1	1	3	2	2	1	1	1	1	1
OG0000679	0	5	5	3	3	0	5	0	2	0	2	1	2	3	0	3	1	0	5	0	0	0	3	2	4	5	2	1	1	1	0	2	1	0	0	0	0	0	0	0	0	0	0	0	0	0	0	2	4
OG0000680	1	1	1	1	1	1	1	1	1	1	1	1	1	2	1	2	2	1	1	1	1	1	1	2	3	1	1	1	1	1	2	0	2	1	1	1	1	2	1	1	1	2	1	1	1	1	1	1	1
OG0000681	1	1	1	0	1	1	1	0	2	2	1	1	1	2	1	2	2	0	2	0	1	0	0	1	2	1	2	2	1	1	2	0	2	0	0	0	1	2	1	1	2	2	1	1	1	1	1	2	2
OG0000682	1	1	1	1	1	2	1	1	2	1	1	0	1	1	2	1	1	0	1	1	1	0	0	1	1	1	1	2	1	1	2	0	3	1	1	1	1	2	1	1	1	2	2	1	1	1	1	2	1
OG0000683	2	2	1	1	1	1	2	1	1	2	1	1	1	1	1	1	1	0	1	1	1	1	1	1	1	2	1	1	1	1	2	1	2	1	1	1	1	4	2	1	1	2	2	1	1	1	0	1	1
OG0000684	1	1	1	0	1	1	0	1	1	2	1	1	1	1	1	1	1	0	1	1	2	1	1	1	1	1	1	1	1	1	1	1	1	1	1	1	1	1	1	1	2	1	1	2	1	1	1	1	1
OG0000685	1	1	1	1	1	1	1	1	2	1	1	1	2	1	1	1	1	0	1	1	1	1	1	1	1	1	1	1	2	2	1	1	1	1	2	1	1	2	1	1	1	2	1	1	1	1	1	2	1
OG0000686	1	1	2	1	1	1	1	1	1	1	1	0	1	1	1	1	3	0	2	1	1	0	1	1	1	1	1	1	1	1	2	1	2	1	1	1	1	1	1	1	1	1	1	1	1	2	1	1	1
OG0000687	1	4	2	1	2	1	1	0	0	3	2	1	1	2	1	1	0	2	1	1	1	0	1	1	1	3	1	2	1	1	1	1	1	0	1	1	1	2	0	2	1	3	1	1	2	1	0	0	1
OG0000688	3	2	1	1	1	1	2	1	1	1	1	1	1	1	1	1	1	1	2	1	1	0	0	1	1	2	1	2	1	1	1	1	1	1	1	1	1	1	1	2	1	1	1	1	1	1	1	1	1
OG0000689	1	2	2	1	2	1	2	1	2	1	1	1	1	1	1	1	0	0	2	1	1	1	1	0	1	2	1	1	1	1	1	1	1	1	2	1	1	1	1	1	1	1	1	1	1	2	1	2	1
OG0000690	2	1	1	1	1	1	1	0	1	1	1	1	1	1	1	1	2	0	2	1	1	1	1	1	1	1	1	1	1	1	1	1	1	1	1	1	1	2	2	1	1	3	2	1	1	2	1	1	1
OG0000691	1	1	1	0	1	1	1	1	1	0	1	0	1	1	1	1	1	1	2	2	1	1	2	1	1	1	1	1	1	1	1	1	1	1	2	1	1	2	2	1	1	2	1	1	1	2	2	1	1
OG0000692	2	2	0	2	2	1	2	1	1	1	3	1	0	0	2	0	1	0	2	0	1	0	2	1	1	2	0	1	0	0	1	0	1	0	1	2	2	2	1	1	1	1	2	1	1	2	1	1	1
OG0000693	1	1	2	0	4	2	1	0	1	1	3	1	1	1	2	1	1	0	2	1	1	0	3	1	1	1	4	2	1	2	2	1	2	0	0	1	1	0	0	1	1	0	1	1	1	1	0	1	1
OG0000694	1	1	1	0	1	1	1	1	1	1	1	2	1	1	0	1	4	2	1	1	1	1	0	1	1	1	1	1	1	1	1	1	1	1	1	1	1	2	1	1	1	1	1	1	1	1	1	1	1
OG0000695	1	1	0	1	1	2	1	1	2	1	1	0	1	1	1	1	1	0	1	1	1	1	1	2	1	1	2	2	1	1	1	1	2	1	1	1	1	1	1	1	1	1	1	1	1	1	1	2	1
OG0000696	2	1	1	1	1	1	1	1	1	1	1	1	1	1	1	1	1	1	1	1	1	2	1	1	1	1	0	1	1	1	1	1	1	2	1	1	1	1	2	1	1	1	2	1	1	1	2	1	1
OG0000697	1	2	6	1	1	1	2	0	2	3	1	3	0	1	1	0	1	0	4	0	2	0	1	1	0	2	0	2	0	0	0	0	1	0	0	0	0	1	0	3	2	1	1	1	5	2	0	2	2
OG0000698	1	1	1	1	1	2	1	0	2	2	2	2	1	1	1	1	2	0	1	0	2	0	1	1	2	1	0	2	1	1	0	2	0	0	1	0	0	2	1	2	3	2	1	2	2	1	1	2	1
OG0000699	0	0	0	0	2	4	0	0	1	4	4	0	1	1	0	2	0	0	0	0	3	0	0	0	2	0	2	2	1	1	0	1	0	2	0	0	0	0	3	2	2	0	3	2	2	0	1	1	1
OG0000700	0	0	0	0	0	2	0	0	0	2	0	1	0	0	6	1	4	3	1	0	5	0	1	0	1	2	1	3	0	0	0	0	0	0	2	0	0	0	2	0	2	1	1	3	1	13	0	0	3
OG0000701	1	2	1	1	1	1	1	1	2	1	1	0	1	1	1	1	1	2	2	2	1	1	1	1	1	1	1	1	1	1	2	0	1	1	1	1	2	1	1	1	1	1	1	1	1	1	1	2	1
OG0000702	1	2	2	2	0	1	2	1	1	1	3	0	2	3	1	1	0	0	3	0	0	0	0	0	1	3	0	0	2	1	3	1	0	0	1	2	2	4	4	1	1	2	1	1	1	3	0	0	2
OG0000703	1	1	1	1	1	1	1	1	2	2	2	0	1	1	1	1	2	2	1	1	1	0	1	1	1	1	1	1	1	1	1	1	0	1	1	1	1	2	1	1	1	1	1	1	1	2	1	2	1
OG0000704	1	1	1	0	2	2	1	1	1	1	1	0	1	1	2	1	2	0	1	1	1	1	3	1	1	1	2	1	1	1	1	1	1	1	0	1	1	1	2	1	1	3	1	1	1	1	1	1	1
OG0000705	0	2	1	3	1	1	2	1	1	0	1	0	1	1	0	1	1	1	1	1	1	0	1	1	1	2	1	0	1	1	1	1	1	2	1	1	1	1	1	0	2	1	0	2	1	2	1	1	1
OG0000706	1	1	1	1	1	1	1	1	1	1	1	1	1	1	1	1	1	2	1	1	1	1	0	1	1	1	1	2	1	2	1	0	1	1	1	1	1	1	1	1	1	1	1	1	1	1	1	1	2
OG0000707	2	2	2	0	2	1	2	0	0	1	2	1	2	2	1	2	1	0	2	0	1	0	2	2	3	2	3	1	2	2	2	3	2	0	0	0	0	0	0	1	1	0	2	1	1	1	0	0	3
OG0000708	1	1	1	2	2	1	0	1	1	1	1	1	1	1	1	1	1	2	1	1	1	1	2	1	1	1	1	1	1	1	1	1	1	1	1	1	1	2	1	1	1	2	1	1	1	1	1	1	1
OG0000709	1	1	2	1	1	1	2	1	1	2	1	0	1	1	1	1	1	0	2	1	1	1	1	1	1	1	1	2	1	1	1	1	1	1	1	0	1	1	2	1	1	1	1	1	1	1	1	1	1
OG0000710	1	1	1	1	1	2	0	1	1	1	1	0	1	1	1	1	1	1	1	1	1	1	1	1	1	1	1	1	1	1	1	1	1	1	1	1	1	2	1	1	1	1	1	1	2	1	1	1	1
OG0000711	1	2	1	1	1	1	1	1	1	1	2	1	2	2	1	3	3	0	4	0	1	0	1	1	1	2	1	0	1	0	1	1	0	0	0	1	1	5	4	1	1	3	1	1	1	1	2	1	2
OG0000712	2	2	1	2	1	1	1	1	1	1	1	0	1	1	1	1	1	0	1	1	1	1	1	1	2	3	1	1	1	1	2	1	2	1	1	2	1	1	1	1	1	1	2	1	1	1	1	1	1
OG0000713	1	2	2	1	1	2	2	0	1	2	2	2	2	2	1	2	1	0	2	0	2	0	1	0	1	2	1	2	2	2	2	2	1	0	1	0	0	1	1	1	2	1	1	2	1	1	0	1	1
OG0000714	1	1	1	1	1	0	1	0	2	2	1	0	2	1	1	1	0	1	1	2	1	0	1	1	2	1	1	1	2	2	2	1	1	0	2	1	1	2	0	1	1	2	1	1	1	0	1	2	2
OG0000715	1	1	1	1	1	2	1	1	1	1	1	1	1	1	1	1	2	1	1	1	1	1	0	1	1	1	1	2	1	1	1	1	1	1	1	1	1	1	1	2	1	1	1	1	1	2	1	1	1
OG0000716	1	2	1	1	1	1	0	1	2	2	2	0	1	0	1	1	1	0	1	1	1	1	1	1	1	2	1	1	1	1	3	1	1	1	0	1	1	0	1	1	2	0	2	0	1	1	1	1	1
OG0000717	1	2	2	3	2	1	2	1	1	1	2	1	1	1	0	1	1	2	1	1	1	0	1	1	1	2	0	1	1	1	1	1	2	1	1	1	1	1	1	1	1	1	1	1	1	1	1	1	1
OG0000718	1	1	1	0	1	1	1	1	1	1	1	1	1	1	1	1	1	1	1	1	1	0	1	1	2	1	1	1	1	1	2	1	2	1	1	1	1	2	2	1	1	2	2	1	1	1	1	1	1
OG0000719	0	3	2	1	1	1	3	1	1	3	1	0	1	1	1	1	1	0	2	1	1	0	1	0	1	2	0	0	0	1	1	1	1	1	1	0	0	1	3	1	1	1	0	1	1	1	1	1	3
OG0000720	0	2	0	1	0	2	0	0	1	2	0	1	1	1	1	1	2	0	1	1	1	0	0	0	0	0	0	5	0	1	0	1	0	0	1	0	0	0	0	2	2	0	2	3	2	4	0	1	2
OG0000721	2	2	1	1	1	1	1	1	1	1	2	0	1	1	1	1	2	1	1	1	1	1	0	1	1	2	0	1	1	1	1	1	1	1	0	1	1	1	1	3	1	1	2	2	1	1	1	1	1
OG0000722	1	1	1	1	1	1	1	1	1	1	1	0	1	1	1	1	1	1	1	1	3	1	1	1	1	1	1	1	1	1	1	1	1	1	1	1	1	1	1	2	1	1	1	2	1	1	1	1	1
OG0000723	1	2	2	2	2	1	2	1	1	3	1	0	1	1	1	0	1	0	3	0	1	0	2	0	1	3	1	1	1	0	1	1	1	1	2	0	0	1	2	1	1	1	1	1	1	1	1	1	1
OG0000724	1	1	0	0	2	3	1	0	3	1	0	0	0	1	4	1	2	0	1	0	1	1	0	0	2	1	0	2	0	0	0	0	0	1	1	0	0	1	3	2	2	1	1	1	0	2	1	3	1
OG0000725	1	1	1	1	1	1	1	1	1	1	1	0	1	1	1	1	1	0	2	1	1	0	1	1	1	1	1	1	1	1	1	1	1	1	3	1	1	5	1	1	1	5	1	1	1	1	1	1	1
OG0000726	1	2	2	1	1	3	1	0	0	3	2	1	0	0	0	1	0	0	2	1	4	1	1	1	1	1	0	2	0	0	1	0	1	0	0	1	0	1	1	2	1	1	0	4	1	1	0	0	1
OG0000727	0	2	1	1	0	1	1	1	2	0	0	0	2	0	1	0	2	0	2	2	0	0	0	1	0	1	0	3	2	0	0	0	1	0	4	0	0	2	1	3	0	2	1	0	3	0	1	1	5
OG0000728	0	3	1	1	2	1	1	2	1	1	1	1	1	1	2	1	1	0	2	1	1	1	1	1	1	3	1	1	1	1	1	1	0	1	1	1	1	1	1	1	1	1	1	1	1	1	1	1	1
OG0000729	2	0	0	1	0	5	0	0	0	0	0	0	0	1	4	0	3	1	0	0	2	0	0	0	1	0	1	4	0	0	1	0	0	0	0	1	0	4	0	0	2	3	2	2	1	4	0	0	1
OG0000730	1	1	1	1	1	1	0	1	2	1	1	0	1	1	1	1	1	1	1	0	1	0	1	1	1	2	1	1	1	1	1	0	1	1	1	1	1	1	2	1	1	1	1	1	1	1	1	2	1
OG0000731	1	1	1	0	1	1	1	1	1	1	1	1	1	1	1	1	2	2	1	1	1	1	1	1	1	1	1	1	1	1	1	1	1	1	2	1	1	1	1	1	1	1	1	1	1	2	1	1	1
OG0000732	1	2	2	1	1	1	2	1	1	1	2	2	1	1	1	1	1	1	2	1	0	0	1	1	1	2	1	1	1	1	1	2	1	1	3	1	1	1	2	1	1	1	1	1	1	1	1	1	1
OG0000733	1	1	1	1	0	1	1	0	1	3	1	1	0	1	0	1	2	0	1	0	1	0	1	0	1	2	0	2	1	0	1	0	2	0	1	0	0	3	2	2	1	3	0	1	2	2	1	1	0
OG0000734	1	1	1	1	1	1	1	1	1	1	1	0	1	1	1	1	2	0	1	1	1	0	1	1	1	1	1	2	1	1	1	1	1	1	1	1	1	1	1	1	1	1	1	1	1	2	1	1	1
OG0000735	1	2	2	1	1	2	2	1	1	1	1	0	1	1	1	1	1	3	2	1	1	0	1	1	1	2	1	2	0	1	1	1	1	1	1	1	1	1	1	1	1	1	1	1	1	1	1	1	1
OG0000736	0	0	0	0	0	1	0	0	2	0	0	1	1	1	0	0	8	0	1	0	1	0	0	0	0	0	1	0	0	1	1	0	1	1	0	4	1	0	0	2	4	1	2	3	3	1	0	0	1
OG0000737	1	1	1	1	1	1	1	0	1	1	1	1	1	1	1	2	1	1	1	1	2	0	1	1	1	1	1	1	1	1	1	1	1	0	1	1	1	1	1	1	2	1	1	1	1	1	0	1	1
OG0000738	1	1	1	0	2	1	1	0	2	2	3	0	1	2	2	1	2	0	1	1	4	0	3	1	0	1	1	2	1	1	3	1	1	0	0	0	0	2	1	1	1	1	0	2	1	1	0	2	2
OG0000739	2	1	0	1	2	1	0	0	1	1	1	0	1	1	0	1	1	2	2	1	0	0	2	1	1	1	1	1	1	1	2	1	2	0	2	0	0	2	1	2	1	2	1	1	1	1	0	1	1
OG0000740	1	1	1	1	1	1	1	1	1	1	1	0	1	1	1	1	1	2	1	1	1	0	1	1	1	1	1	1	1	1	1	0	1	1	2	2	2	1	1	1	1	1	1	1	1	1	1	1	1
OG0000741	1	0	0	2	0	2	0	0	2	2	1	0	1	1	0	1	1	0	1	0	1	0	0	0	2	0	0	2	1	1	0	1	1	1	1	0	0	1	2	2	3	1	1	1	2	2	0	2	2
OG0000742	1	2	2	2	1	2	1	0	1	3	2	0	0	1	0	1	1	0	2	0	2	0	1	1	1	2	1	1	1	1	0	1	0	0	0	0	0	0	1	3	1	0	0	2	3	1	0	0	1
OG0000743	1	1	1	1	1	1	1	1	1	2	1	1	1	1	1	1	1	1	1	1	3	0	1	1	1	1	1	1	1	1	1	1	1	1	1	1	1	1	1	2	1	1	1	2	1	1	1	1	1
OG0000744	1	2	0	1	1	3	0	0	2	4	3	1	0	0	2	0	3	0	1	1	2	0	1	0	0	2	1	1	0	0	1	0	0	0	0	0	0	2	1	2	2	0	0	2	2	3	1	1	0
OG0000745	4	3	2	0	2	2	2	0	0	2	4	0	0	2	0	1	2	0	3	0	0	0	2	2	3	3	0	1	0	0	6	0	1	0	0	0	0	1	1	1	0	1	2	0	1	2	0	0	1
OG0000746	1	1	1	1	1	1	1	0	2	1	1	1	2	2	1	2	1	0	1	1	1	1	1	2	1	1	1	1	2	2	1	0	1	1	1	1	1	2	1	1	1	2	1	1	1	1	1	2	1
OG0000747	1	1	0	1	1	1	0	1	2	1	1	1	1	1	1	1	1	0	1	1	1	0	1	1	1	1	1	1	1	1	1	1	1	1	0	1	1	1	1	1	1	1	1	1	1	2	1	2	1
OG0000748	1	2	2	1	1	1	2	1	2	2	1	0	1	1	1	0	1	0	1	1	1	1	1	1	1	2	1	1	1	1	1	1	1	1	0	0	0	1	1	1	2	1	1	1	1	1	1	2	1
OG0000749	1	1	1	0	1	1	1	1	1	1	1	1	1	1	1	1	2	0	1	1	1	0	1	1	1	0	1	1	1	1	2	1	1	1	1	1	1	4	2	1	1	3	1	1	1	1	1	1	1
OG0000750	1	1	1	1	1	1	1	1	2	1	1	1	1	1	1	1	2	1	1	2	1	0	1	1	1	1	1	1	1	0	1	0	1	1	0	0	0	3	2	1	1	1	1	1	1	1	1	2	1
OG0000751	1	1	1	1	1	1	1	1	1	1	3	0	1	1	1	1	1	1	1	1	1	1	1	1	1	1	2	2	1	1	1	0	1	1	0	1	1	1	1	1	1	2	1	1	1	1	1	1	1
OG0000752	2	2	2	0	2	2	2	0	0	2	2	2	0	0	2	0	0	2	2	0	3	0	2	0	1	2	1	4	0	0	0	0	2	1	0	0	0	1	1	2	2	0	2	2	2	0	1	0	0
OG0000753	1	2	2	2	0	1	2	0	1	0	2	0	0	1	4	2	3	0	3	0	3	0	0	0	0	2	3	2	0	0	1	0	1	0	0	0	0	10	0	0	0	3	1	2	0	2	0	1	0
OG0000754	1	2	2	1	1	1	2	0	1	2	1	0	1	1	1	1	4	0	2	1	1	1	1	1	0	2	1	2	1	0	1	1	1	1	0	0	0	1	1	2	1	0	1	1	1	2	1	1	2
OG0000755	1	1	1	0	1	1	0	1	1	1	1	2	1	1	1	2	1	3	1	1	1	1	1	1	1	1	1	1	1	1	1	1	1	1	2	1	1	2	1	1	1	2	1	1	1	1	1	1	1
OG0000756	1	1	1	1	1	2	1	0	1	1	2	1	2	1	1	1	1	0	2	1	2	0	1	1	1	1	0	1	1	1	1	1	1	0	0	0	0	1	1	2	2	1	1	2	2	1	0	1	1
OG0000757	1	1	1	3	1	2	1	1	1	3	2	1	1	1	2	1	1	0	1	1	1	0	1	1	1	1	0	0	1	1	1	2	1	0	2	1	1	1	0	1	2	1	1	1	2	1	0	1	1
OG0000758	1	1	1	1	1	1	1	1	1	1	1	1	1	1	1	1	1	0	1	1	1	1	1	1	1	1	1	1	1	1	1	1	1	1	1	1	1	2	1	1	1	1	1	1	1	1	1	1	1
OG0000759	1	1	1	1	1	1	1	1	1	1	1	0	1	1	1	1	1	8	1	1	1	0	1	0	1	1	1	1	1	1	1	1	1	1	1	1	1	1	1	1	1	1	1	1	1	1	1	1	1
OG0000760	1	1	1	1	1	1	1	1	1	2	2	0	1	2	1	1	2	0	2	1	1	1	2	1	1	1	2	1	1	1	2	0	0	1	1	1	1	2	1	1	1	2	1	1	1	1	1	1	1
OG0000761	2	1	1	1	2	1	1	1	2	1	1	0	1	1	1	1	1	1	2	1	2	1	1	1	2	1	1	1	1	1	1	1	1	1	1	1	1	0	1	1	1	0	2	1	1	1	1	2	1
OG0000762	1	1	1	1	1	1	1	1	1	1	1	0	1	1	1	1	1	1	1	1	1	1	0	1	2	1	2	1	1	1	1	1	1	1	2	1	1	1	1	1	1	1	1	1	1	1	1	1	2
OG0000763	1	1	1	1	1	2	1	1	1	2	1	1	0	0	1	0	2	0	1	1	1	0	0	0	0	1	0	3	0	0	1	0	1	1	1	0	0	1	1	2	2	1	1	2	2	3	1	1	0
OG0000764	1	1	1	1	1	1	1	0	1	1	1	0	1	2	1	1	1	2	1	1	1	1	1	1	1	1	1	2	1	1	1	1	1	1	1	0	0	1	1	2	1	1	1	1	1	2	1	1	1
OG0000765	1	1	1	1	1	1	1	1	2	1	1	0	1	1	1	1	1	3	1	1	1	0	2	1	1	1	1	1	1	1	1	1	1	1	1	1	1	1	1	1	1	1	1	1	1	1	1	2	1
OG0000766	1	1	1	1	1	1	1	1	1	1	2	0	1	1	1	1	1	2	1	1	1	0	1	1	1	1	1	1	1	1	1	1	1	1	0	0	0	1	1	1	2	1	1	1	1	1	1	1	1
OG0000767	1	2	2	1	2	1	1	1	0	1	2	1	1	1	1	1	1	0	2	1	2	1	2	1	1	2	1	1	0	1	1	1	2	1	0	1	1	1	1	0	1	1	1	1	1	1	1	0	1
OG0000768	1	1	1	1	1	1	1	1	1	1	1	1	1	1	1	1	1	0	1	1	2	1	1	1	1	1	1	1	1	1	1	1	1	1	1	1	1	1	1	1	1	1	1	2	1	1	1	1	1
OG0000769	1	2	2	1	1	1	2	0	1	1	2	0	2	3	1	2	1	1	2	1	1	1	1	1	1	2	1	1	2	2	1	2	0	1	0	0	0	1	1	1	1	1	1	1	1	1	1	1	1
OG0000770	1	1	1	1	1	1	1	1	1	1	1	0	1	1	1	1	1	2	1	1	1	0	1	2	1	1	1	1	1	2	1	1	1	1	1	1	1	1	1	1	1	1	1	1	1	1	1	1	1
OG0000771	0	0	0	0	0	0	0	0	0	2	0	0	0	1	3	1	0	2	4	3	1	0	0	0	0	0	0	4	0	0	2	0	2	1	0	0	0	2	4	3	0	3	1	2	2	2	2	0	2
OG0000772	1	1	2	2	1	1	2	0	2	1	1	0	1	1	1	1	1	3	2	1	1	0	0	1	1	1	1	1	1	1	1	1	1	0	3	0	0	1	1	1	1	1	0	1	1	2	0	2	1
OG0000773	1	1	1	1	2	1	1	1	1	1	1	0	1	1	1	1	1	2	1	1	1	1	1	1	1	1	1	1	1	1	2	0	1	1	1	1	1	1	1	1	1	1	1	1	1	1	1	1	1
OG0000774	1	1	1	1	1	1	1	2	1	1	1	1	1	1	1	1	1	1	1	1	1	1	1	1	1	1	0	1	1	1	1	1	1	1	0	2	2	2	1	1	1	2	1	1	1	1	1	1	1
OG0000775	2	3	1	1	2	1	1	1	1	1	1	1	1	1	0	1	1	1	1	1	1	1	1	1	1	3	1	1	1	1	1	1	1	1	0	1	1	2	1	1	1	2	2	1	1	1	1	1	1
OG0000776	1	1	1	1	1	1	1	1	1	2	1	0	1	1	1	1	1	1	1	1	1	0	1	1	1	1	1	1	1	1	1	1	1	1	1	1	1	1	1	1	1	1	1	1	1	1	1	1	1
OG0000777	1	1	1	1	1	1	1	1	1	1	1	1	1	1	1	1	1	1	1	1	1	1	1	1	1	1	1	1	1	0	1	1	1	1	3	1	1	2	1	1	1	2	1	1	1	1	1	1	1
OG0000778	1	5	1	0	1	1	2	0	0	4	1	0	0	1	1	0	3	3	2	0	0	0	0	0	1	6	0	4	0	0	1	0	1	0	1	1	1	0	5	1	0	0	0	3	1	2	0	0	2
OG0000779	1	1	1	1	1	1	1	0	1	1	1	1	1	1	1	1	1	2	2	1	1	0	1	1	1	1	0	1	1	1	2	0	1	1	1	1	1	1	1	1	1	1	1	1	2	1	1	1	1
OG0000780	1	1	1	1	1	1	0	1	1	1	2	2	1	2	1	1	1	0	1	1	1	1	1	1	1	1	1	1	1	2	2	1	1	1	1	1	1	2	1	1	1	2	1	1	1	1	1	1	1
OG0000781	1	1	1	1	1	2	1	2	1	1	1	0	1	1	1	1	1	1	1	1	1	0	1	1	3	1	1	2	1	1	1	1	1	1	0	1	1	1	1	1	1	1	1	1	1	1	1	1	3
OG0000782	2	1	1	0	1	1	1	1	1	1	1	0	1	1	2	1	1	1	1	1	1	1	1	1	1	1	1	1	1	1	1	0	1	2	1	1	1	1	1	1	1	1	3	1	2	1	1	1	1
OG0000783	1	1	1	1	1	1	0	1	1	1	1	1	2	1	1	1	1	0	1	1	2	1	1	1	1	1	1	1	1	1	1	1	2	1	1	1	1	1	1	1	1	1	1	2	1	1	1	1	1
OG0000784	0	2	2	1	2	0	1	0	1	1	2	1	1	1	1	1	1	0	2	1	0	1	2	1	1	2	1	1	1	1	1	1	2	1	1	1	1	1	1	1	1	1	1	0	1	1	1	1	2
OG0000785	0	0	1	3	0	1	0	1	2	2	0	0	2	1	0	1	2	0	1	1	1	1	0	0	0	0	0	2	2	1	1	2	0	1	0	0	0	1	2	2	1	1	0	1	2	1	1	2	1
OG0000786	1	1	1	1	1	1	0	1	1	1	1	1	1	1	1	1	1	0	1	1	1	1	1	1	1	1	0	1	1	1	1	1	1	1	1	1	1	1	1	1	2	1	0	2	1	1	0	1	1
OG0000787	2	6	3	0	4	2	4	0	0	1	1	1	0	0	3	0	2	0	10	0	1	0	2	1	0	4	0	1	0	0	0	0	1	0	0	0	0	0	0	2	1	0	3	1	4	1	0	0	0
OG0000788	1	1	1	1	1	1	0	1	1	1	1	1	1	1	1	1	1	0	1	1	1	0	1	1	1	1	1	1	1	1	1	1	2	1	1	1	1	1	1	1	1	1	1	1	1	1	1	1	1
OG0000789	1	2	2	1	1	1	2	1	2	1	2	0	1	1	1	1	1	1	2	0	1	0	2	1	1	2	1	1	1	1	1	1	1	1	1	1	1	1	1	1	1	1	1	1	1	1	1	1	1
OG0000790	1	1	1	0	1	1	1	1	1	0	1	2	1	1	1	1	1	1	1	1	1	1	1	1	1	1	1	1	1	2	1	1	1	1	2	1	1	1	1	1	1	1	1	1	1	2	1	1	2
OG0000791	1	1	1	1	1	1	1	1	1	1	1	1	1	1	1	1	1	2	1	1	1	0	2	1	1	1	1	1	1	1	1	2	1	1	1	1	1	1	1	1	1	1	1	1	1	1	1	1	1
OG0000792	1	2	1	1	1	1	1	1	1	1	1	1	1	1	1	1	1	2	2	1	1	1	1	1	1	1	1	1	1	0	1	1	1	2	2	1	1	1	1	1	1	1	1	1	1	1	1	1	1
OG0000793	1	1	1	2	1	1	1	1	2	1	2	1	1	1	1	1	1	1	1	1	1	0	0	1	1	1	1	1	1	1	1	1	1	1	1	1	1	1	1	1	1	1	1	1	1	1	1	2	1
OG0000794	1	2	1	1	1	1	1	1	1	1	1	0	1	1	1	1	1	1	2	1	1	1	1	1	1	2	1	1	1	1	1	1	1	1	3	1	1	1	1	1	1	1	1	1	1	1	1	1	1
OG0000795	1	1	1	2	2	1	1	2	1	1	2	0	1	1	1	1	0	0	2	1	1	0	2	0	1	1	0	1	1	1	2	0	1	1	1	0	0	1	1	1	1	1	1	1	1	1	1	1	1
OG0000796	1	1	1	1	1	1	1	1	1	1	1	2	1	1	1	1	1	1	1	1	2	0	1	1	1	1	1	1	1	1	1	1	1	1	1	1	1	1	1	1	1	1	1	2	1	1	1	1	1
OG0000797	1	2	2	1	1	1	1	0	1	2	2	0	1	1	1	1	0	3	2	1	1	1	1	0	0	2	1	1	1	1	1	1	1	2	2	1	1	3	2	0	1	3	1	1	0	0	2	1	0
OG0000798	1	3	3	1	1	1	1	0	1	1	1	0	1	1	1	1	1	5	1	1	1	1	1	1	1	3	1	1	1	1	1	1	1	1	0	1	1	1	1	1	1	1	1	1	1	1	1	1	1
OG0000799	1	1	1	1	1	1	1	1	1	1	1	0	1	1	1	1	1	1	1	1	1	1	1	2	1	1	2	1	2	1	2	1	1	1	1	1	1	1	1	1	1	1	1	1	1	1	1	1	1
OG0000800	1	1	1	2	1	1	1	1	1	2	1	0	1	1	1	1	2	0	1	1	1	0	1	1	1	1	1	1	1	1	1	1	1	1	0	1	0	2	1	1	1	2	1	1	1	2	1	1	1
OG0000801	0	1	2	0	0	3	2	0	2	2	1	0	0	0	0	0	10	0	2	0	0	0	0	0	0	2	0	1	0	0	1	0	0	0	5	0	0	1	2	2	0	3	0	1	0	7	1	2	3
OG0000802	0	2	2	0	1	1	2	1	1	2	1	0	1	2	1	1	1	0	1	1	1	1	1	1	1	2	1	1	1	1	1	1	1	1	1	1	1	1	1	1	1	1	0	1	1	2	1	1	1
OG0000803	3	1	1	1	1	1	1	0	1	1	1	1	2	2	2	2	1	0	1	1	1	0	2	2	1	1	2	1	2	2	1	2	1	0	0	1	2	1	1	1	1	1	3	1	1	1	0	1	1
OG0000804	1	2	2	1	1	1	2	1	2	2	1	0	1	1	1	1	1	0	1	1	1	1	1	1	1	2	1	1	1	1	1	1	1	1	0	0	0	1	1	1	2	1	1	1	1	1	1	2	1
OG0000805	2	1	2	1	1	1	1	1	1	1	1	1	1	1	1	1	1	0	1	1	1	0	1	0	2	1	1	1	1	1	2	1	1	1	1	1	1	1	1	2	1	1	1	1	1	1	1	1	1
OG0000806	1	1	0	0	1	1	1	1	1	1	1	1	1	1	1	1	1	2	1	1	1	1	1	0	2	1	1	1	1	1	1	1	1	1	1	1	1	1	1	1	1	1	1	1	1	1	1	1	2
OG0000807	1	1	1	1	1	1	1	1	2	1	1	0	1	1	1	1	1	0	1	1	1	1	1	0	1	2	1	1	1	1	1	1	1	1	1	1	1	1	1	1	1	2	1	1	1	1	1	2	1
OG0000808	1	1	1	1	1	1	1	1	1	1	1	0	2	2	1	1	1	0	1	1	1	0	1	0	1	1	1	1	2	2	1	2	2	1	1	1	1	1	1	1	1	1	1	1	1	1	1	1	1
OG0000809	1	1	1	1	1	1	1	1	1	1	1	1	0	1	1	1	1	6	1	1	1	2	1	0	1	1	0	1	0	0	1	0	1	3	0	0	0	1	2	1	1	1	1	1	1	1	3	1	2
OG0000810	1	1	1	0	1	1	1	1	1	1	2	1	1	1	1	0	2	3	1	1	1	1	1	1	1	2	1	1	1	1	1	1	1	1	1	1	1	1	1	1	1	1	1	1	1	2	1	1	1
OG0000811	1	2	1	1	1	1	2	1	1	1	0	0	1	1	1	1	3	0	1	1	1	1	1	1	1	2	1	1	1	1	1	1	1	1	1	1	1	1	1	1	1	1	1	1	1	3	1	1	1
OG0000812	1	3	3	0	0	0	3	1	1	2	2	0	1	2	0	2	3	0	3	1	4	0	0	1	1	3	0	0	1	1	2	1	0	0	0	0	0	0	0	0	1	1	1	3	0	2	1	1	1
OG0000813	1	1	1	0	1	1	0	1	1	2	1	1	1	1	1	1	1	0	1	1	2	0	0	1	1	1	1	1	1	1	1	1	1	0	0	1	1	0	1	1	2	0	1	2	1	1	1	1	1
OG0000814	1	1	1	1	1	1	1	1	1	1	1	0	1	1	1	1	1	1	1	1	1	1	1	1	2	1	1	1	1	1	1	1	1	1	1	1	1	1	1	1	1	1	1	1	1	1	1	1	2
OG0000815	1	1	1	1	1	1	1	1	1	1	1	0	1	1	1	1	1	0	1	1	1	1	1	1	0	1	1	1	1	1	1	1	1	1	2	2	2	1	1	1	1	1	1	1	1	1	1	1	1
OG0000816	1	1	1	1	1	1	1	1	1	1	1	1	1	1	1	1	1	3	1	1	1	1	1	1	1	1	1	1	1	2	1	1	1	1	1	1	1	1	1	1	1	1	1	1	1	1	1	1	1
OG0000817	1	1	1	0	1	1	1	1	2	1	1	1	1	1	1	1	1	0	1	1	1	0	1	1	1	1	1	1	1	1	1	1	0	1	0	1	1	3	1	1	1	3	1	1	1	1	1	2	1
OG0000818	0	1	1	1	1	1	1	1	1	3	2	1	1	1	1	0	2	0	1	1	1	1	1	1	1	1	0	1	1	2	1	1	1	1	0	0	0	1	1	1	1	3	0	2	1	3	1	1	2
OG0000819	0	1	1	2	1	1	1	0	1	2	1	0	1	1	1	0	1	0	1	1	1	0	1	2	1	1	1	1	1	1	2	0	2	1	0	1	1	1	1	1	1	1	1	1	1	1	1	1	1
OG0000820	0	0	0	0	0	7	0	0	0	1	0	0	0	0	0	21	4	0	0	0	0	0	0	0	0	0	0	5	0	0	0	0	0	0	3	0	0	5	0	0	0	4	0	5	0	1	2	0	5
OG0000821	1	1	0	1	1	1	0	1	1	1	1	0	1	1	1	1	1	1	1	1	1	0	1	1	1	1	1	1	1	1	2	2	1	1	1	1	1	1	1	1	1	2	1	1	1	1	1	1	1
OG0000822	2	1	1	1	1	1	1	1	1	1	1	1	1	1	2	1	1	0	1	0	1	1	1	1	1	1	1	1	1	1	2	1	0	1	1	1	1	4	1	1	1	2	2	1	1	1	1	1	1
OG0000823	1	1	1	1	1	1	1	1	1	1	1	1	1	1	1	1	1	1	1	1	1	0	1	1	1	1	1	1	1	1	1	2	1	1	1	1	1	1	1	1	1	1	1	1	1	1	1	1	1
OG0000824	1	1	1	1	1	1	1	2	1	1	1	0	1	1	2	1	1	1	1	1	1	0	1	1	1	1	1	1	1	1	2	0	1	1	1	1	1	2	1	1	1	1	1	1	1	1	1	1	1
OG0000825	1	1	1	1	1	1	1	1	1	1	1	1	1	1	1	1	1	0	1	1	1	0	1	1	1	1	1	1	1	1	1	1	1	1	3	1	1	1	1	1	1	1	1	1	1	1	1	1	1
OG0000826	1	1	1	1	1	1	1	1	1	1	1	0	1	1	1	2	1	2	1	2	1	1	2	1	1	1	1	1	1	2	2	1	1	1	1	1	1	1	1	1	1	1	1	1	1	1	1	1	1
OG0000827	1	1	1	1	1	1	1	1	1	1	1	1	1	1	1	1	1	1	1	1	1	0	2	1	1	1	1	1	1	1	1	1	1	1	1	1	1	1	1	1	1	1	1	1	1	1	1	1	1
OG0000828	1	2	1	1	1	1	1	1	1	1	1	1	1	1	1	1	1	0	1	1	1	0	1	1	1	2	0	1	1	1	1	1	1	1	1	1	1	2	1	1	1	2	1	1	1	1	1	1	1
OG0000829	1	1	1	1	1	1	1	1	1	1	1	1	1	1	1	1	1	1	1	1	1	1	1	1	1	1	1	1	1	1	1	1	1	1	1	1	1	1	1	1	1	1	1	1	1	1	1	1	1
OG0000830	1	1	1	1	1	1	1	1	1	1	1	0	1	2	1	1	1	1	1	1	1	1	1	1	1	1	1	1	1	2	1	1	1	1	1	1	1	1	1	1	1	1	1	1	1	1	1	1	1
OG0000831	1	1	0	2	1	1	1	1	1	1	1	0	1	1	1	1	1	3	1	1	1	0	1	1	1	1	1	1	1	0	1	1	1	1	2	1	1	1	2	1	1	1	1	1	1	1	1	1	1
OG0000832	0	0	0	0	0	2	0	0	5	4	0	2	2	1	1	9	0	0	0	0	1	0	0	0	1	0	1	0	0	0	0	0	0	0	0	10	43	0	0	0	1	0	0	0	0	0	0	3	0
OG0000833	0	0	0	0	0	0	0	0	0	1	0	1	0	0	0	0	1	0	0	0	5	0	0	3	0	0	0	0	0	0	0	0	0	0	0	0	0	0	1	2	1	0	0	6	22	0	0	0	4
OG0000834	1	1	1	2	1	1	1	1	1	2	1	1	1	1	1	1	1	0	1	1	1	1	1	0	1	1	1	1	0	1	1	1	1	1	1	0	0	1	2	1	1	1	1	1	1	2	1	1	1
OG0000835	1	1	1	1	1	1	1	1	1	1	1	1	1	1	1	1	1	1	1	1	1	1	1	1	1	1	1	1	1	1	1	1	1	1	1	1	1	1	1	1	1	1	1	1	1	1	1	1	1
OG0000836	1	1	2	1	1	1	1	1	1	1	1	1	1	1	1	1	1	2	1	0	1	0	1	0	1	1	1	1	1	0	1	1	1	1	1	1	1	1	1	1	1	1	1	1	1	2	1	1	1
OG0000837	1	1	1	1	1	1	1	1	1	1	1	1	1	1	1	1	1	2	1	1	1	0	1	1	1	1	1	1	1	1	1	1	1	1	1	1	1	1	1	1	1	1	1	1	1	1	1	1	1
OG0000838	2	2	2	1	1	2	2	0	1	1	1	1	1	0	1	1	4	0	2	1	1	0	1	1	1	2	0	2	1	1	0	1	0	0	0	0	0	0	1	2	1	4	2	1	2	3	0	1	0
OG0000839	2	1	1	0	2	1	0	1	1	1	0	1	1	1	1	1	1	0	0	0	1	1	2	1	1	1	1	2	1	1	2	1	1	1	0	1	1	1	1	1	1	1	2	2	1	1	1	1	1
OG0000840	1	1	1	0	1	1	2	1	2	1	1	0	1	1	1	1	1	1	1	1	1	0	1	1	1	1	1	1	1	1	1	1	1	1	1	1	1	1	1	1	1	1	1	1	1	1	1	1	1
OG0000841	1	1	1	1	1	1	1	1	1	1	1	0	1	1	1	1	1	1	1	1	1	0	1	1	1	1	1	1	1	1	1	1	1	1	1	1	1	1	1	1	1	1	1	1	1	1	1	1	1
OG0000842	1	1	1	1	1	1	1	1	1	1	1	1	1	1	1	1	1	0	1	1	1	0	1	1	1	1	1	1	1	1	1	1	1	1	1	1	1	1	1	1	1	2	1	1	1	1	1	1	1
OG0000843	1	1	1	1	1	1	1	1	1	1	1	1	0	1	1	1	1	2	1	1	1	1	1	1	1	1	0	1	1	1	1	1	1	1	1	1	1	1	1	1	1	1	1	1	1	2	1	1	1
OG0000844	1	1	1	1	1	1	1	1	1	1	1	1	1	1	1	1	1	0	1	2	0	0	2	1	1	1	1	1	1	0	2	1	1	1	1	1	1	1	1	1	1	2	1	1	1	1	1	1	1
OG0000845	1	1	1	0	1	1	1	1	1	1	1	0	1	1	1	1	1	0	1	1	2	1	1	1	1	1	1	1	1	1	1	1	1	1	1	1	1	1	1	1	1	1	1	2	1	1	1	1	1
OG0000846	1	1	1	0	1	2	1	1	1	1	1	0	1	1	1	1	1	1	1	1	2	0	0	1	1	1	1	1	1	1	1	1	1	1	1	1	1	1	1	1	1	1	1	2	1	1	1	1	1
OG0000847	2	1	1	1	1	2	1	0	0	2	0	1	0	1	1	1	2	0	1	0	2	0	0	2	3	1	1	2	0	0	0	0	1	0	0	1	1	2	1	2	2	2	2	2	2	2	0	0	2
OG0000848	1	1	1	1	1	1	1	1	2	1	1	1	1	1	1	1	1	0	1	1	1	0	0	1	0	1	1	1	1	1	1	1	1	1	1	1	1	1	1	2	1	1	1	1	1	1	1	2	1
OG0000849	1	1	1	1	1	1	0	1	1	2	1	1	1	1	1	1	1	1	1	1	1	0	1	1	1	1	1	1	1	1	1	1	1	1	1	1	1	1	1	1	1	1	1	1	1	1	1	1	1
OG0000850	1	1	1	1	1	1	1	1	1	1	1	0	1	1	1	1	1	1	1	1	1	0	1	1	1	1	1	1	1	1	1	2	1	1	1	1	1	1	1	1	1	1	1	1	1	1	1	1	1
OG0000851	1	2	2	1	1	1	2	1	1	1	1	0	1	1	1	1	1	0	2	1	1	1	1	1	1	2	1	1	0	1	1	0	1	1	1	1	1	1	2	1	1	1	1	1	1	1	1	1	1
OG0000852	1	1	1	1	1	1	1	1	1	1	1	0	1	1	1	1	1	1	1	1	1	0	1	1	1	1	2	2	1	1	1	1	1	1	1	1	1	2	1	1	1	1	1	1	1	2	1	1	1
OG0000853	1	1	1	1	1	2	1	1	1	1	1	0	1	1	1	1	1	1	1	1	1	1	1	1	1	1	1	2	1	1	1	1	1	1	1	1	1	1	1	1	1	1	1	1	1	2	1	1	1
OG0000854	1	1	1	1	1	1	0	1	1	1	1	1	1	2	1	1	1	0	1	1	1	1	1	1	1	1	1	1	1	1	1	1	1	1	2	1	1	1	1	1	1	1	1	1	1	1	1	1	1
OG0000855	1	1	1	1	1	1	2	1	1	1	1	0	1	1	2	1	1	1	1	1	1	1	1	1	1	1	1	1	1	1	1	0	1	1	1	2	1	1	0	1	1	1	1	1	1	1	1	1	1
OG0000856	1	1	0	1	1	1	0	1	1	2	1	1	1	1	1	1	1	0	1	1	1	1	1	1	1	1	1	1	1	1	1	1	1	1	1	1	1	2	1	1	1	2	1	1	1	1	1	1	1
OG0000857	1	1	1	1	1	1	1	1	1	1	1	1	1	1	1	1	1	0	2	1	1	1	2	1	1	1	1	1	1	2	1	1	1	1	1	1	1	1	1	1	1	1	1	1	1	1	1	1	1
OG0000858	1	1	1	1	1	1	1	1	1	1	1	0	1	1	2	1	1	1	1	1	1	2	1	1	1	1	1	1	1	1	1	1	1	1	1	1	1	1	1	1	1	1	1	1	1	1	1	1	1
OG0000859	1	1	1	1	1	1	1	1	1	1	1	0	1	1	1	1	1	1	1	1	1	0	1	1	1	1	1	1	2	1	1	1	1	1	1	1	1	1	2	1	1	1	1	1	1	1	1	1	1
OG0000860	1	1	1	1	1	1	1	1	1	1	1	0	1	1	1	1	1	1	1	1	1	0	1	1	1	1	0	3	1	1	1	1	1	1	1	1	1	1	1	1	1	1	1	1	1	1	1	1	1
OG0000861	1	1	1	1	1	1	1	1	1	1	1	1	1	1	1	1	1	0	1	1	1	0	1	1	1	0	1	1	1	1	1	1	1	1	1	1	1	1	1	1	1	1	1	2	1	1	1	1	1
OG0000862	1	1	1	1	1	1	1	1	1	1	1	0	1	1	1	1	1	1	1	1	1	1	1	1	1	1	1	1	1	2	1	1	2	1	1	1	1	1	1	1	1	1	1	1	1	1	1	1	1
OG0000863	0	1	1	0	1	2	1	1	1	3	1	0	1	1	2	2	1	0	1	1	1	0	1	2	2	1	1	1	1	2	1	1	0	1	0	0	0	0	2	1	2	2	0	2	1	1	0	1	1
OG0000864	1	1	1	1	1	1	1	1	1	1	1	0	1	1	1	1	1	2	1	1	1	1	1	0	1	1	1	1	1	1	1	0	1	1	1	0	1	1	1	1	1	1	1	1	1	1	1	1	1
OG0000865	2	2	2	3	0	2	3	0	3	1	2	2	0	0	0	0	0	0	2	2	2	0	1	2	0	2	0	1	0	0	3	0	2	0	0	0	0	1	1	2	1	2	1	2	2	1	0	0	1
OG0000866	1	1	1	1	1	1	1	1	1	1	1	0	1	1	1	1	1	1	1	1	1	1	1	1	1	1	1	1	1	1	1	1	1	1	1	1	1	1	1	1	1	1	1	1	1	1	1	1	1
OG0000867	1	1	1	1	1	1	1	1	1	1	1	1	1	1	1	1	1	1	1	1	1	1	1	1	1	1	1	1	1	0	1	1	1	1	1	1	1	1	1	1	1	1	1	1	1	1	1	1	1
OG0000868	1	1	1	1	1	1	1	1	1	1	1	1	1	1	1	1	1	2	1	1	1	0	1	1	1	1	1	1	1	1	1	1	2	1	1	1	1	1	1	1	1	1	1	1	1	1	1	1	1
OG0000869	1	1	1	1	1	1	1	1	1	1	1	1	1	1	1	1	1	2	1	1	1	0	2	1	1	1	2	1	2	1	1	1	1	1	1	1	1	1	1	1	1	1	1	1	1	1	1	1	1
OG0000870	1	1	1	1	1	1	1	1	1	1	1	1	1	1	1	1	1	1	1	1	1	1	1	1	1	1	1	1	1	1	1	1	1	1	1	1	1	1	1	1	1	1	1	1	1	1	1	1	1
OG0000871	1	1	1	1	1	1	1	0	1	1	1	0	2	2	1	2	1	0	1	1	1	1	0	1	1	1	0	1	2	2	1	1	2	1	1	1	1	2	1	1	1	2	1	1	1	0	1	1	1
OG0000872	1	1	1	1	1	1	1	1	1	1	1	1	1	1	1	1	1	0	1	1	1	1	1	1	1	1	1	1	1	1	1	1	1	1	2	1	1	3	1	1	1	1	1	1	1	1	1	1	1
OG0000873	1	1	1	1	1	1	0	1	1	1	1	0	1	1	1	1	1	1	1	1	1	1	1	1	1	1	1	1	1	1	1	1	1	1	1	1	1	1	1	1	1	1	1	1	1	1	1	1	1
OG0000874	1	1	1	1	1	1	1	1	1	1	1	0	1	1	1	1	1	1	1	1	1	0	1	1	1	1	1	1	1	2	1	1	1	1	1	1	1	1	1	1	1	1	1	1	1	1	1	1	1
OG0000875	1	1	1	1	1	1	1	1	1	1	1	1	1	1	1	1	1	0	1	1	1	0	0	1	1	1	1	1	1	2	1	1	1	1	1	1	1	1	1	1	1	1	1	1	1	1	1	1	1
OG0000876	1	1	1	1	1	1	1	2	1	1	1	1	1	1	1	0	1	0	2	0	0	0	1	2	1	1	0	1	1	1	0	0	2	1	1	2	2	1	2	1	1	1	1	0	1	1	1	1	1
OG0000877	1	1	1	1	1	1	0	1	1	2	1	1	1	1	1	1	1	0	1	1	1	1	1	1	1	1	1	1	1	1	1	1	1	1	1	1	1	1	1	1	1	1	1	1	2	1	1	1	1
OG0000878	1	1	1	1	1	1	1	1	1	1	1	0	1	1	1	1	1	4	1	1	1	1	1	1	1	1	1	1	1	1	1	1	1	1	1	1	1	1	1	1	1	1	1	1	1	1	1	1	1
OG0000879	1	1	1	0	1	1	0	1	1	1	1	0	1	1	2	1	0	2	1	1	1	0	1	2	1	1	1	2	1	1	1	1	1	1	2	1	1	1	1	1	1	1	1	1	1	1	1	1	1
OG0000880	1	1	1	1	1	1	1	1	1	1	1	1	1	1	1	1	1	2	2	1	1	1	1	1	1	1	2	1	1	1	1	1	1	1	1	1	1	1	1	1	1	1	1	1	1	1	1	1	1
OG0000881	1	1	1	1	1	1	1	0	1	1	1	1	1	1	1	0	2	1	1	1	1	1	2	1	1	1	1	1	1	1	0	1	2	1	2	1	1	1	1	1	1	1	1	1	1	1	1	1	1
OG0000882	1	1	0	1	1	1	0	1	1	1	1	0	1	1	1	1	2	0	2	1	1	1	1	1	1	1	1	1	1	1	1	1	1	1	1	1	1	2	1	1	1	2	1	1	1	1	1	1	1
OG0000883	2	1	1	0	2	1	1	1	1	1	1	0	0	0	2	0	1	1	1	0	1	1	2	0	2	1	0	1	0	0	1	0	2	3	2	1	1	0	1	1	1	1	2	1	1	1	2	1	2
OG0000884	1	2	1	2	2	2	1	1	2	1	1	0	1	1	0	1	1	0	1	0	1	1	1	1	0	2	1	1	1	0	2	0	2	1	2	2	2	2	2	1	0	1	2	1	1	1	1	2	1
OG0000885	1	1	1	1	1	1	1	1	1	1	1	0	1	1	1	1	1	0	1	1	1	1	1	1	1	1	0	1	1	1	1	1	1	1	2	1	2	1	1	1	1	1	1	1	1	1	1	1	1
OG0000886	1	1	1	2	1	2	1	0	1	2	1	1	0	1	0	2	1	0	2	0	2	1	1	0	2	1	0	2	0	0	0	0	0	1	2	0	0	2	1	1	1	3	1	2	1	1	0	1	2
OG0000887	1	1	1	0	0	3	1	0	1	1	2	1	1	1	2	1	2	3	1	0	1	0	0	0	2	2	0	3	1	0	4	1	1	0	1	1	2	1	0	0	1	1	1	2	0	2	0	1	1
OG0000888	1	1	0	1	1	1	0	1	1	1	1	0	1	1	1	1	1	1	1	1	1	1	1	1	1	1	2	1	1	1	1	1	1	1	1	1	1	1	1	1	1	1	1	1	1	1	1	1	1
OG0000889	1	2	2	2	2	2	2	0	2	3	3	0	0	0	0	0	0	0	2	0	1	0	1	0	1	2	0	1	0	0	4	0	0	0	1	0	0	1	1	1	1	2	1	2	1	1	1	2	2
OG0000890	1	1	0	1	1	1	0	1	1	1	1	1	1	1	1	1	1	2	1	1	1	1	1	1	1	1	1	1	1	1	1	1	1	1	1	1	1	1	1	1	1	1	1	1	1	1	1	1	1
OG0000891	1	1	1	0	1	1	1	1	1	1	1	1	1	1	1	1	1	2	1	1	1	1	1	1	1	1	1	1	1	1	1	1	1	1	1	1	1	1	1	1	1	1	1	1	1	1	1	1	1
OG0000892	1	1	2	1	1	1	2	1	1	1	1	1	1	1	1	1	1	0	2	1	1	0	1	1	1	1	0	1	1	1	1	1	1	1	1	1	1	2	1	1	1	1	1	1	1	1	1	1	1
OG0000893	1	1	1	1	1	1	1	1	1	1	1	0	1	1	1	1	1	1	1	1	1	1	1	1	1	1	1	1	1	1	1	1	1	1	1	1	1	1	1	1	1	1	1	1	1	1	1	1	1
OG0000894	3	2	1	2	1	0	1	1	2	3	1	0	1	0	2	0	0	0	1	1	3	0	1	0	0	2	1	3	1	1	2	1	1	0	1	1	0	0	1	1	0	0	2	3	0	0	2	2	0
OG0000895	1	1	1	1	1	1	1	1	1	1	1	0	1	1	1	1	1	1	1	1	1	1	1	1	1	1	1	1	1	1	1	1	1	1	1	1	1	1	1	1	1	1	1	1	1	1	1	1	1
OG0000896	1	1	1	1	1	1	1	1	1	1	1	0	1	1	1	1	1	1	1	1	1	1	1	1	1	1	1	1	1	1	1	1	2	1	2	1	1	1	1	1	1	1	1	1	1	1	1	1	1
OG0000897	4	2	3	1	0	0	4	0	1	1	0	1	2	0	3	3	2	0	6	0	1	0	1	3	1	3	0	0	2	2	0	1	0	0	5	0	1	1	0	1	0	2	2	1	0	1	0	1	0
OG0000898	1	1	1	1	2	1	0	1	1	1	1	0	1	1	1	1	1	2	1	1	1	1	1	1	1	1	0	1	1	1	1	1	1	1	1	1	1	2	1	1	1	1	1	1	1	1	1	1	1
OG0000899	1	1	1	1	1	1	1	1	1	1	1	1	1	1	1	1	1	1	1	1	1	1	1	1	1	1	2	1	1	1	1	1	1	1	1	1	1	1	1	1	1	1	1	1	1	1	1	1	1
OG0000900	1	1	1	1	1	1	1	1	1	1	1	1	1	1	1	2	1	0	1	1	1	0	1	1	1	1	1	1	1	1	1	1	1	1	2	1	1	1	1	2	1	1	1	1	1	1	1	1	1
OG0000901	1	1	1	1	1	1	0	1	1	1	1	1	1	1	1	1	2	2	1	1	1	1	1	1	1	1	1	1	1	1	1	1	1	1	1	1	1	1	1	1	1	1	1	1	1	1	1	1	1
OG0000902	1	1	1	1	1	1	1	1	1	1	1	0	1	1	1	1	1	3	1	1	1	0	1	1	1	1	0	1	1	1	1	1	1	1	1	1	1	1	1	1	1	1	1	1	1	1	1	1	1
OG0000903	1	1	1	2	1	1	1	1	1	1	1	0	1	1	1	1	1	1	1	1	1	1	1	1	1	1	0	1	1	1	2	1	2	1	1	1	1	1	1	1	1	1	1	1	1	1	1	1	1
OG0000904	1	1	0	1	1	1	0	1	1	1	1	1	1	1	1	1	1	1	1	1	1	1	1	1	1	1	1	1	1	1	1	1	1	1	1	1	1	1	1	1	1	1	1	1	1	1	1	1	1
OG0000905	1	1	1	1	1	1	1	1	1	1	1	1	1	1	1	1	1	1	1	1	1	1	0	1	1	1	1	1	1	1	1	1	1	1	1	1	1	1	1	1	1	1	1	1	1	1	1	1	1
OG0000906	1	1	1	1	1	1	1	1	1	1	1	0	1	1	1	1	3	1	3	1	1	0	1	2	1	1	1	1	1	0	1	0	1	1	1	1	1	1	1	1	1	1	1	1	1	1	1	1	1
OG0000907	1	1	1	0	1	1	1	1	1	1	1	0	1	1	1	1	1	0	1	1	1	1	0	1	1	1	1	1	1	1	1	1	1	1	1	1	1	1	1	1	1	1	1	1	1	1	1	1	1
OG0000908	1	1	1	1	1	1	1	1	1	1	1	1	1	1	1	1	1	1	1	1	1	1	1	1	1	1	0	1	1	1	1	1	1	1	1	1	1	1	1	1	1	1	1	1	1	1	1	1	1
OG0000909	1	1	1	0	1	1	1	1	1	1	1	1	1	1	1	1	1	1	1	1	1	1	1	1	1	1	1	1	1	2	2	1	1	1	1	1	1	1	1	1	1	1	1	1	1	1	1	1	1
OG0000910	1	1	0	0	1	1	0	1	1	1	1	0	1	1	1	1	1	1	1	1	1	1	1	1	1	1	1	1	1	1	1	1	1	1	1	1	1	3	1	1	1	5	1	1	1	1	1	1	1
OG0000911	1	1	1	1	1	1	1	1	1	1	1	1	1	1	1	1	1	3	1	1	1	1	1	1	1	1	0	1	1	1	1	1	1	1	1	1	1	1	1	1	1	1	1	1	1	1	1	1	1
OG0000912	1	1	1	1	1	1	0	1	1	1	1	1	0	1	1	1	1	0	1	1	2	0	1	1	1	1	0	1	1	1	1	1	1	1	1	1	1	1	1	1	1	1	1	2	1	1	1	1	1
OG0000913	1	1	1	1	1	1	0	2	1	1	1	0	1	1	1	1	1	1	1	1	0	0	2	1	1	1	1	1	1	1	1	0	1	1	1	1	1	2	1	1	1	0	1	2	1	1	1	1	1
OG0000914	1	1	1	1	1	1	1	1	1	1	1	0	1	1	1	1	1	1	1	1	1	1	1	1	1	1	2	1	1	1	1	1	1	1	1	1	1	3	1	1	1	1	1	1	1	1	1	1	1
OG0000915	1	1	1	0	1	1	1	1	1	1	1	1	1	1	1	1	1	1	1	1	1	1	1	1	1	1	1	1	1	1	1	1	1	1	1	1	1	1	1	1	1	1	1	1	1	1	1	1	1
OG0000916	1	1	1	1	1	1	1	1	1	1	1	0	1	1	1	1	1	0	1	1	1	1	1	1	1	1	2	1	1	1	1	1	0	1	1	1	1	1	2	1	1	1	1	1	1	1	1	1	1
OG0000917	1	1	0	1	1	1	0	2	1	1	1	0	1	1	1	1	1	2	1	1	1	0	0	1	1	1	1	1	1	1	1	1	1	1	2	1	1	1	1	1	1	1	1	1	1	1	1	1	1
OG0000918	1	1	1	1	1	1	1	1	1	1	1	1	1	1	1	1	1	0	1	1	1	1	1	1	1	1	1	1	1	1	1	0	1	1	1	1	1	1	1	1	1	1	1	1	1	1	1	1	1
OG0000919	1	2	1	1	1	1	2	1	1	1	1	0	1	1	1	1	1	0	1	1	1	1	1	1	1	2	1	1	1	1	1	1	1	1	0	1	1	1	1	1	1	1	1	1	1	1	1	1	1
OG0000920	1	1	1	1	1	1	1	0	1	1	1	0	1	1	1	1	1	2	1	1	1	1	1	1	1	1	1	1	1	1	1	1	1	1	1	1	1	2	1	1	1	2	1	0	1	2	1	1	1
OG0000921	2	2	1	0	1	2	2	1	1	1	2	0	1	2	0	1	9	0	0	1	0	0	2	1	1	0	0	1	1	0	0	0	0	0	1	1	1	4	2	1	0	1	1	0	2	8	3	2	0
OG0000922	1	1	1	1	1	1	0	1	1	1	1	0	1	1	1	1	1	1	1	1	1	1	1	1	1	1	1	1	1	0	1	1	1	1	1	1	1	2	1	1	1	2	1	1	1	1	1	1	1
OG0000923	5	2	2	1	1	1	2	0	0	1	0	1	0	0	0	0	0	3	2	0	1	0	1	0	0	2	0	3	0	0	2	0	1	0	1	4	3	0	0	2	1	0	4	1	1	2	0	0	0
OG0000924	1	1	1	1	1	1	1	1	1	1	1	1	1	1	1	1	1	1	1	1	1	1	0	1	1	1	1	1	1	1	1	1	1	1	1	1	1	1	1	1	1	1	1	1	1	1	1	1	1
OG0000925	1	1	1	1	1	1	2	1	1	1	1	0	1	1	1	1	1	1	1	1	1	0	1	1	1	1	0	1	1	1	2	1	1	1	1	1	1	1	1	1	1	1	1	1	1	1	1	1	1
OG0000926	1	1	1	1	1	1	1	1	1	1	1	1	1	1	1	1	1	1	1	1	1	1	0	1	1	1	1	1	1	0	1	1	1	1	1	1	1	1	1	1	1	1	1	1	1	1	1	1	1
OG0000927	1	1	1	1	1	1	1	1	1	1	1	1	1	1	1	1	1	1	1	1	1	1	1	1	1	1	1	1	1	1	1	1	1	1	1	1	1	1	1	1	1	1	1	1	1	1	1	1	1
OG0000928	1	1	1	1	1	1	1	1	1	2	1	0	1	1	1	1	1	1	1	1	1	1	1	1	1	1	1	1	1	1	1	1	1	1	1	1	1	1	1	1	1	1	1	1	1	1	1	1	1
OG0000929	1	1	1	1	1	1	1	1	1	1	1	1	1	2	3	1	1	0	1	1	1	1	1	1	1	1	1	1	1	1	1	0	1	1	1	1	1	1	1	1	1	1	1	1	1	1	1	1	1
OG0000930	1	1	1	1	1	1	1	1	1	1	1	0	1	1	1	1	1	1	1	1	1	0	1	0	1	1	1	1	1	1	1	1	1	1	1	1	1	1	1	1	1	1	1	1	1	1	1	1	1
OG0000931	1	1	1	1	1	1	1	1	1	1	1	0	1	1	1	1	1	1	1	1	1	0	1	1	1	1	1	1	1	1	1	1	1	1	1	1	1	1	1	1	1	1	1	1	1	1	1	1	1
OG0000932	1	1	1	1	1	1	1	1	1	1	1	0	1	1	1	1	1	1	1	1	1	0	1	1	1	1	1	1	1	1	1	1	1	1	1	1	1	1	1	1	1	1	1	1	1	1	1	1	1
OG0000933	1	1	1	1	1	1	1	1	1	1	1	0	1	1	1	1	1	1	1	1	1	1	1	1	1	1	1	2	1	1	1	1	1	1	1	1	1	1	1	1	1	1	1	1	1	2	1	1	1
OG0000934	1	1	1	0	1	1	1	1	1	1	1	1	1	1	1	1	1	2	1	1	1	0	0	2	1	1	2	1	1	1	1	2	1	1	1	1	1	1	1	1	1	1	1	1	1	1	1	1	1
OG0000935	1	1	1	1	1	1	1	1	1	1	1	1	1	1	1	1	1	0	1	1	1	0	1	1	1	1	1	1	1	1	1	1	1	1	1	1	1	1	1	1	1	1	1	1	1	1	1	1	1
OG0000936	1	1	1	1	2	1	1	1	1	1	1	0	1	1	1	1	1	0	1	1	1	1	2	1	1	1	1	1	1	1	1	1	1	1	1	1	1	1	1	1	1	1	1	1	1	1	1	1	1
OG0000937	1	1	1	1	1	1	1	1	1	1	1	0	1	1	1	1	1	1	1	1	1	1	1	1	1	0	1	1	1	1	1	1	1	1	1	1	1	1	1	1	1	1	1	1	1	1	1	1	1
OG0000938	1	1	1	1	1	1	1	1	1	1	1	0	1	1	1	1	1	0	2	1	1	1	1	1	1	1	1	1	1	1	1	0	1	1	2	1	1	1	1	1	1	1	1	2	1	1	1	1	1
OG0000939	1	1	1	0	1	1	1	1	2	1	2	0	1	1	1	1	1	1	1	1	1	0	0	1	1	1	1	1	1	1	1	1	1	1	1	1	1	1	1	1	1	1	1	1	1	1	1	1	1
OG0000940	1	1	0	1	1	1	0	1	1	1	1	1	1	1	1	1	1	1	1	1	1	1	1	1	1	1	1	1	1	0	1	1	1	1	1	1	1	1	1	1	1	1	1	1	1	1	1	1	1
OG0000941	1	1	1	1	1	1	1	1	1	1	1	0	1	1	1	1	1	0	2	1	1	0	1	1	1	1	1	1	1	1	1	1	1	1	1	1	1	1	1	1	1	1	1	1	1	1	1	1	1
OG0000942	3	1	1	1	2	1	1	0	1	1	1	1	1	1	2	1	2	0	1	1	1	0	1	1	0	1	1	1	1	1	2	0	1	0	1	0	0	5	1	1	1	5	2	1	1	2	2	1	0
OG0000943	1	1	1	1	1	1	0	1	1	1	1	1	1	1	1	1	1	1	1	1	1	1	1	1	1	1	2	1	1	1	1	1	1	1	1	1	1	1	1	1	1	1	1	2	1	1	1	1	1
OG0000944	1	1	1	1	1	1	1	1	1	1	1	1	1	1	1	1	1	1	1	1	1	1	1	1	1	1	0	1	1	1	1	1	1	1	1	1	1	1	1	1	2	1	1	1	1	1	1	1	1
OG0000945	1	1	1	1	1	1	1	1	1	1	1	1	1	1	1	1	1	3	1	1	1	1	1	1	1	1	1	1	1	1	1	1	1	1	1	1	1	1	1	1	1	1	1	1	1	1	1	1	1
OG0000946	1	1	1	0	2	1	1	0	0	0	1	0	0	0	6	0	0	0	1	0	1	0	1	0	1	1	4	3	0	0	0	0	1	0	0	2	4	0	0	3	1	0	1	1	1	2	2	0	5
OG0000947	1	1	1	1	1	1	1	1	1	1	1	1	1	1	1	2	1	2	1	1	1	1	1	0	1	1	1	1	1	0	1	1	1	1	1	2	1	1	1	1	1	1	1	1	1	1	1	1	1
OG0000948	1	1	1	1	1	1	1	1	1	1	1	1	1	1	1	1	1	1	1	1	1	1	1	2	1	1	1	1	1	1	1	1	1	1	1	1	1	1	1	1	1	1	1	1	1	1	1	1	1
OG0000949	1	1	1	1	1	1	1	1	1	1	1	0	1	1	1	1	1	2	1	1	1	1	1	1	1	1	1	1	1	1	1	1	1	1	1	1	1	1	1	1	1	1	1	1	1	1	1	1	1
OG0000950	1	1	1	1	1	1	1	1	1	1	1	0	1	1	1	1	1	3	1	1	1	1	1	2	1	1	1	1	1	2	1	1	1	1	1	1	1	1	1	1	1	1	1	1	1	1	1	1	1
OG0000951	1	1	0	0	1	1	0	1	1	1	1	1	1	1	1	1	1	1	1	1	1	1	1	1	1	2	1	1	1	0	1	1	1	1	1	1	1	1	1	1	1	1	1	1	1	1	1	1	1
OG0000952	1	1	1	1	1	1	1	1	1	1	1	1	1	1	1	1	1	0	1	1	1	1	1	1	1	1	1	1	1	1	1	1	1	1	2	1	1	1	1	1	1	1	1	1	1	1	1	1	1
OG0000953	1	1	1	1	1	1	1	1	1	1	1	1	1	1	0	1	1	0	1	1	1	1	1	1	1	1	1	1	1	1	1	1	1	1	0	1	1	1	1	1	1	1	1	1	1	1	1	1	1
OG0000954	0	1	1	0	2	5	1	0	1	1	0	2	0	0	1	0	4	0	1	0	1	0	2	0	1	1	0	3	0	0	1	0	0	0	0	0	0	0	1	1	2	1	0	2	1	6	0	1	1
OG0000955	1	1	1	2	1	1	1	1	1	1	1	1	1	1	1	1	1	1	1	1	1	1	1	1	1	1	0	1	1	1	1	1	1	1	1	1	1	1	1	1	1	1	1	1	1	1	1	1	1
OG0000956	1	1	1	0	1	1	1	0	1	1	2	0	1	1	1	1	1	1	1	1	1	1	1	1	1	2	0	1	1	1	1	1	1	1	1	1	1	1	1	1	1	1	1	1	1	1	1	1	1
OG0000957	1	1	1	1	1	1	1	1	1	1	1	1	1	1	1	1	1	1	1	1	1	1	1	1	1	1	1	1	1	1	1	1	1	1	1	1	1	1	1	1	1	1	1	1	1	1	1	1	1
OG0000958	1	1	1	1	1	1	1	1	1	2	1	1	1	1	1	1	1	0	1	1	1	2	1	1	1	0	1	1	1	1	1	1	1	1	1	1	1	1	1	1	1	1	1	1	1	1	1	1	1
OG0000959	1	1	1	1	1	1	1	1	1	1	1	1	1	1	1	1	1	1	1	1	1	1	1	1	1	1	1	1	1	1	1	1	1	1	1	1	1	1	1	1	1	1	1	1	1	1	1	1	1
OG0000960	1	1	1	1	1	1	1	1	1	1	1	0	1	1	1	1	1	1	1	1	1	1	1	1	1	1	1	1	1	1	1	1	1	1	1	1	1	1	1	1	1	1	1	1	1	1	1	1	1
OG0000961	1	1	1	1	1	1	1	1	1	1	1	1	1	1	1	1	1	1	1	1	1	1	1	1	1	1	0	1	1	1	1	1	1	1	1	1	1	1	1	1	1	1	1	1	1	1	1	1	1
OG0000962	1	1	1	1	1	1	1	1	1	1	1	1	1	1	1	1	1	1	1	1	1	0	1	1	1	1	0	1	1	1	1	1	1	1	1	1	1	1	1	1	1	1	1	1	1	1	1	1	1
OG0000963	1	1	1	1	1	1	1	1	1	1	1	0	1	1	1	1	1	0	1	1	1	1	0	1	1	1	1	1	1	1	1	1	1	1	2	1	1	1	1	1	1	1	1	1	1	1	1	1	1
OG0000964	1	1	1	1	1	1	0	1	1	1	1	0	1	1	1	1	1	3	1	1	1	1	1	1	1	1	1	2	1	1	1	1	1	1	0	1	1	1	1	1	1	1	1	1	1	1	1	1	1
OG0000965	1	1	1	1	1	1	1	1	1	1	1	1	1	1	1	1	1	2	1	1	1	1	1	1	1	1	1	1	1	1	1	1	1	1	1	1	1	1	1	1	1	1	1	1	1	1	1	1	1
OG0000966	2	1	1	1	1	1	1	1	1	1	1	1	1	1	1	1	2	0	2	1	1	1	1	1	1	1	1	1	1	1	2	3	2	1	1	0	0	1	0	1	1	1	1	1	1	1	1	1	1
OG0000967	1	1	1	1	1	1	1	1	1	1	1	1	1	1	1	1	1	0	1	1	1	0	1	1	1	1	1	1	1	1	1	1	1	1	1	1	1	1	0	1	1	1	1	1	1	1	1	1	1
OG0000968	1	1	1	1	1	1	1	1	1	1	1	1	1	1	1	1	1	1	1	1	1	0	1	1	1	1	1	1	1	1	2	1	1	1	1	1	1	1	1	1	1	1	1	1	1	1	1	1	1
OG0000969	1	1	1	1	1	1	0	1	1	1	1	1	1	1	1	1	1	1	1	1	1	0	1	0	1	1	1	1	1	1	1	1	1	1	1	1	1	1	1	1	1	1	1	1	1	1	1	1	1
OG0000970	1	1	0	1	1	1	0	1	1	1	1	1	1	1	1	1	1	0	1	1	2	0	1	1	1	1	1	1	1	1	1	1	1	1	1	1	1	1	1	1	1	1	1	1	1	1	1	1	1
OG0000971	1	1	1	1	1	1	1	1	1	1	1	0	1	1	1	1	1	0	1	1	1	1	1	1	1	1	1	1	1	1	1	1	1	1	1	1	1	1	1	1	1	1	1	1	1	1	1	1	1
OG0000972	1	1	1	1	1	1	1	2	1	1	1	0	1	1	1	1	1	3	1	1	1	1	1	1	1	1	1	1	1	1	1	1	1	1	1	1	1	1	1	1	1	1	1	1	1	1	1	1	1
OG0000973	1	2	1	1	1	1	2	1	1	1	1	1	1	1	0	1	1	0	1	1	1	1	1	0	1	2	1	1	1	1	1	1	1	1	1	1	1	0	1	1	1	0	1	1	1	1	1	1	1
OG0000974	1	1	1	1	1	1	1	1	1	1	1	0	1	1	1	1	1	1	1	1	1	0	1	1	1	1	2	1	1	1	1	1	1	1	1	1	1	1	1	1	1	1	1	1	1	1	1	1	1
OG0000975	1	1	0	1	1	1	0	1	1	1	1	1	1	1	1	1	2	1	1	1	1	0	1	2	1	1	1	1	1	1	1	1	1	1	1	1	1	1	1	1	1	1	1	1	1	1	1	1	1
OG0000976	2	1	1	0	1	2	1	0	0	1	1	2	2	2	1	1	2	1	1	1	1	0	1	1	3	1	1	2	2	2	1	1	1	0	1	0	0	0	0	1	2	0	1	1	1	2	0	0	2
OG0000977	1	1	1	1	1	1	1	1	1	1	1	1	1	1	1	1	1	2	2	1	1	0	2	1	1	1	1	1	1	1	1	1	1	1	2	1	1	1	1	1	1	1	1	1	1	1	1	1	1
OG0000978	1	1	0	1	1	1	0	1	1	1	1	1	1	1	1	1	1	1	1	1	1	1	1	1	1	1	1	1	1	1	1	1	1	1	1	1	1	1	1	1	1	1	1	1	1	1	1	1	1
OG0000979	1	1	1	1	1	1	1	1	1	1	1	1	1	1	1	1	1	0	1	1	1	1	1	1	1	1	2	1	1	1	1	1	1	1	1	1	1	1	1	1	1	1	1	1	1	1	1	1	1
OG0000980	1	1	1	1	1	1	1	1	1	1	1	1	1	1	1	1	1	0	1	1	1	0	1	1	1	1	1	1	1	1	1	1	1	1	1	1	1	1	1	1	1	1	1	1	1	1	1	1	1
OG0000981	1	1	1	0	1	1	1	1	1	1	1	1	1	1	1	1	1	0	1	1	1	1	1	1	1	1	1	1	1	1	1	1	1	1	1	1	1	1	1	1	1	1	1	1	1	1	1	1	1
OG0000982	1	1	1	1	1	1	1	1	1	1	1	0	1	1	1	1	1	1	1	1	1	1	1	1	1	1	1	1	1	1	1	0	1	1	1	1	1	1	1	1	1	1	1	1	1	1	1	1	1
OG0000983	1	1	1	1	1	1	1	1	1	1	1	0	1	1	1	1	1	1	1	1	1	1	1	1	1	1	1	1	1	1	1	1	1	1	1	1	1	1	1	1	1	1	1	1	1	1	1	1	1
OG0000984	1	1	1	1	1	1	1	1	1	1	1	0	1	1	1	1	1	1	1	1	1	0	1	1	1	1	1	1	1	1	1	1	1	1	1	1	1	1	1	1	1	1	1	1	1	1	1	1	1
OG0000985	1	1	1	1	1	1	0	1	1	1	1	1	1	1	1	1	1	2	1	1	1	1	1	1	1	1	1	1	1	1	1	1	1	1	1	1	1	1	1	1	1	1	1	1	1	1	1	1	1
OG0000986	1	1	1	1	1	1	0	1	1	1	1	1	1	1	1	1	1	2	1	1	1	0	1	1	1	1	1	1	1	1	1	1	1	1	1	1	1	1	1	1	1	1	1	1	1	1	1	1	1
OG0000987	1	2	2	1	1	1	1	2	1	1	2	0	1	1	1	1	1	0	2	1	1	0	0	1	2	2	0	1	1	1	1	2	1	0	2	1	1	0	1	0	1	0	1	1	1	1	0	1	2
OG0000988	1	1	1	1	1	1	1	1	1	1	1	1	1	1	1	1	1	0	1	1	1	1	1	1	1	1	1	1	1	1	1	1	1	1	1	1	1	1	1	1	1	1	1	1	1	1	1	1	1
OG0000989	1	1	1	1	1	1	1	1	1	1	1	1	1	1	1	1	1	0	1	1	1	1	1	1	1	1	1	1	1	1	1	1	1	1	1	1	1	1	1	1	1	1	1	1	1	1	1	1	1
OG0000990	1	1	1	0	1	1	1	1	1	1	1	0	1	1	1	1	1	1	1	1	1	1	0	1	1	1	1	1	1	1	1	1	1	1	1	1	1	1	1	1	1	1	1	1	1	1	1	1	1
OG0000991	1	1	2	1	1	1	1	1	1	1	1	1	1	1	1	1	1	0	1	1	1	1	0	1	1	1	1	1	1	1	1	1	1	1	1	1	1	1	1	1	1	1	1	1	1	2	1	1	1
OG0000992	1	1	1	1	1	1	1	1	1	1	1	0	1	2	1	1	1	1	1	1	1	0	0	1	1	1	1	1	1	1	1	1	1	1	1	1	1	2	1	1	1	2	1	1	1	1	1	1	1
OG0000993	1	1	1	1	1	1	1	1	1	1	1	1	1	1	1	1	1	1	1	1	1	0	1	1	1	1	0	1	1	1	1	1	2	1	1	1	1	1	1	1	1	1	1	1	1	1	1	1	1
OG0000994	1	1	1	1	1	1	0	1	1	1	1	0	1	1	1	1	1	0	1	1	1	1	1	1	1	1	1	1	1	1	1	1	1	1	1	1	1	1	1	1	1	1	1	1	1	1	1	1	1
OG0000995	1	1	1	1	1	1	1	1	1	1	1	1	1	1	1	1	1	1	1	1	1	1	1	1	1	1	0	1	1	1	1	1	1	1	1	1	1	1	1	1	1	1	1	1	1	1	1	1	1
OG0000996	1	1	1	1	1	1	1	1	1	1	1	0	1	1	1	1	1	0	1	1	2	1	1	2	1	1	1	1	1	1	1	1	1	1	1	1	1	1	1	1	1	1	1	2	1	1	1	1	1
OG0000997	1	1	1	1	1	2	1	1	1	1	1	0	1	1	1	1	1	1	1	1	2	0	1	1	1	1	1	1	1	1	1	1	1	1	2	1	1	1	1	1	1	1	1	2	1	1	1	1	1
OG0000998	0	4	1	0	5	1	1	0	1	1	1	0	0	1	0	0	0	0	3	0	2	1	5	0	1	4	1	2	0	0	0	0	1	1	0	0	0	0	4	1	0	0	0	2	2	0	0	1	0
OG0000999	0	0	1	1	0	1	1	1	0	1	1	0	0	0	1	0	0	0	1	0	1	0	0	3	0	0	0	1	0	0	1	0	0	0	0	0	0	4	1	4	1	0	0	1	2	2	1	0	0
OG0001000	1	1	1	1	1	1	1	1	1	1	1	1	1	1	1	1	1	0	1	1	1	0	1	0	1	1	0	1	1	1	1	1	1	1	1	1	1	1	1	1	1	1	1	1	1	1	1	1	1
OG0001001	1	1	1	1	1	1	1	1	1	1	1	1	1	1	1	1	1	1	1	1	1	0	0	1	1	1	1	1	1	1	1	0	1	1	1	1	1	1	1	1	1	1	1	1	1	1	1	1	1
OG0001002	1	1	1	1	1	1	1	1	1	1	1	0	1	1	1	1	2	0	1	1	1	1	1	1	1	1	1	1	1	1	1	1	1	1	1	1	2	1	1	1	1	1	1	1	1	1	1	1	1
OG0001003	1	1	1	1	1	1	1	1	1	1	1	1	1	1	1	1	1	0	1	1	1	1	1	1	1	1	0	1	1	1	1	1	1	1	1	1	1	1	2	1	1	1	1	1	1	1	1	1	1
OG0001004	1	1	1	1	1	1	1	1	1	1	1	0	1	1	1	1	1	1	1	1	1	1	1	1	1	1	1	1	1	1	1	1	1	1	1	1	1	1	1	1	1	1	1	1	1	1	1	1	1
OG0001005	1	1	1	1	1	1	1	1	1	1	1	1	1	1	1	1	1	1	1	1	1	1	1	1	1	1	1	1	1	1	1	1	1	1	1	1	1	1	1	1	1	1	1	1	1	1	1	1	1
OG0001006	1	1	1	1	1	1	1	1	1	1	1	1	1	1	1	1	1	3	1	1	1	1	1	1	1	1	0	1	1	1	1	1	1	1	1	0	1	1	1	1	1	1	1	1	1	1	1	1	1
OG0001007	1	1	1	1	1	1	1	1	1	1	1	0	1	1	1	1	1	1	1	1	1	1	1	1	1	1	1	1	1	1	1	1	1	1	1	1	1	1	1	1	1	1	1	1	1	1	1	1	1
OG0001008	1	1	1	1	1	1	1	1	1	1	1	1	1	1	1	1	1	0	1	1	1	1	1	1	1	1	1	1	1	1	1	1	1	1	1	1	1	1	1	1	1	1	1	1	1	1	1	1	1
OG0001009	1	1	1	1	1	1	1	1	1	1	1	0	1	1	1	0	1	0	1	1	1	1	1	1	1	1	1	1	1	1	1	1	1	1	1	1	1	1	1	1	1	1	1	1	1	1	1	1	1
OG0001010	1	1	1	1	1	1	0	1	1	1	1	0	1	1	1	1	1	3	1	1	1	1	1	1	1	1	1	1	1	1	1	1	1	1	1	1	1	1	1	1	1	1	1	1	1	1	1	1	1
OG0001011	1	1	1	1	1	1	1	1	1	1	1	1	1	1	1	1	1	1	1	1	1	0	1	1	1	1	1	1	1	2	1	1	1	1	1	1	1	1	1	1	1	1	1	1	1	1	1	1	1
OG0001012	1	1	1	1	1	1	0	1	1	1	1	0	1	1	1	1	1	1	1	1	0	0	1	1	1	1	1	1	1	1	1	1	1	1	1	1	1	1	1	1	1	1	1	2	1	1	1	1	1
OG0001013	1	1	1	1	1	1	1	1	1	1	1	1	1	1	1	0	1	0	1	1	1	1	1	1	1	1	1	1	1	0	2	0	1	1	1	1	1	2	1	1	1	2	0	1	1	1	1	1	1
OG0001014	1	1	1	1	1	1	1	1	1	1	1	0	1	1	1	1	1	1	1	1	1	1	1	1	1	1	1	1	1	1	1	0	1	1	1	1	1	1	1	1	1	1	1	1	1	1	1	1	1
OG0001015	1	1	1	0	1	1	1	1	1	1	1	0	1	1	1	1	1	1	1	1	1	1	1	1	1	1	1	1	1	1	1	1	1	1	1	1	1	1	1	1	1	1	1	1	1	1	1	1	1
OG0001016	1	1	1	0	1	1	1	1	1	1	1	0	1	1	1	1	1	2	1	1	1	0	0	1	1	0	2	1	1	1	1	2	1	1	2	1	1	1	1	1	1	1	1	1	1	1	1	1	1
OG0001017	1	1	1	1	1	1	1	1	1	1	1	1	1	1	1	1	1	3	1	1	1	0	1	1	1	1	0	1	1	2	1	1	1	1	1	1	1	1	1	1	1	1	1	1	1	1	1	1	1
OG0001018	2	1	1	1	1	1	0	1	1	1	1	0	1	1	1	1	1	1	1	1	1	1	1	1	1	1	0	2	1	1	1	1	1	1	2	1	1	1	1	1	1	1	2	1	1	1	1	1	1
OG0001019	1	1	1	1	1	1	1	1	1	1	1	1	1	1	1	1	1	1	1	1	1	0	1	0	1	1	1	1	1	1	1	1	1	1	1	1	1	1	1	1	1	1	1	1	1	1	1	1	1
OG0001020	1	1	1	1	1	1	0	1	1	1	1	1	1	1	1	1	1	1	1	1	1	1	1	1	1	1	1	1	1	1	1	1	1	1	1	1	1	1	1	1	1	1	1	1	1	1	1	1	1
OG0001021	1	1	1	1	1	1	1	1	1	1	1	1	1	1	1	1	1	1	1	1	1	1	1	1	1	1	1	1	1	1	1	1	1	1	1	1	1	1	1	1	1	1	1	1	1	1	1	1	1
OG0001022	1	1	1	1	1	1	1	1	1	1	1	1	1	1	1	1	1	3	1	1	1	0	1	1	1	1	1	1	1	1	1	1	1	1	1	1	1	1	1	1	1	1	1	1	1	1	1	1	1
OG0001023	1	1	1	1	1	1	0	1	1	1	1	1	1	1	1	1	1	1	1	1	1	1	1	1	1	1	1	1	1	1	1	1	1	1	1	1	1	1	1	1	1	1	1	1	1	1	1	1	1
OG0001024	1	1	1	1	1	1	1	1	1	1	1	0	1	1	1	1	1	2	1	1	1	1	1	1	1	1	1	1	1	1	2	0	1	1	1	1	1	2	1	1	1	1	1	1	1	1	1	1	1
OG0001025	1	1	1	1	1	1	1	1	1	1	1	0	3	1	2	1	1	0	2	1	1	1	1	1	2	1	0	1	2	1	2	1	1	0	1	0	0	1	1	1	1	2	1	1	3	1	1	1	2
OG0001026	1	1	1	1	1	1	1	1	1	1	1	1	1	1	1	1	2	1	1	1	1	1	1	1	1	1	1	1	1	1	1	1	1	1	1	1	1	1	1	1	1	1	1	1	1	1	1	1	1
OG0001027	1	2	2	1	1	2	2	1	1	1	1	0	0	1	1	1	1	0	1	1	1	1	1	1	1	2	1	1	0	0	1	0	1	1	0	1	1	1	2	1	1	1	1	1	1	1	1	1	1
OG0001028	1	1	1	1	1	1	1	1	1	1	1	0	1	1	1	1	1	1	1	1	1	0	1	1	1	1	1	1	1	1	1	1	1	1	2	1	1	1	1	1	1	1	1	1	1	1	1	1	1
OG0001029	1	1	1	1	1	1	1	1	1	2	1	0	1	1	1	1	2	0	1	1	1	1	1	0	2	1	0	2	1	1	1	1	1	1	0	1	1	1	1	1	1	1	1	1	1	2	1	1	1
OG0001030	1	1	1	1	1	1	0	1	1	1	1	0	1	1	1	1	1	1	2	1	1	0	0	1	1	1	1	1	1	1	1	1	1	1	1	1	1	1	1	1	1	1	1	1	1	1	1	1	1
OG0001031	1	1	1	1	1	1	1	1	1	1	1	1	1	1	1	1	1	0	1	1	1	1	1	1	1	1	1	1	1	1	1	1	1	1	1	1	1	1	1	1	1	1	1	1	1	1	1	1	1
OG0001032	1	1	1	2	1	2	1	1	1	1	1	0	1	1	2	1	1	0	1	0	1	0	1	1	1	1	0	2	1	1	1	1	1	1	1	0	0	2	1	2	1	2	1	1	2	1	1	1	1
OG0001033	1	1	1	1	1	1	1	1	1	1	1	0	1	1	1	1	1	0	1	1	1	0	1	1	1	1	1	2	1	1	1	1	1	1	3	1	1	1	1	1	1	1	1	1	1	1	1	1	1
OG0001034	1	1	1	1	1	1	1	1	1	1	1	0	1	1	1	1	1	1	1	1	1	0	0	1	1	1	1	1	1	1	1	0	1	1	1	2	1	1	1	1	1	1	1	1	1	1	1	1	1
OG0001035	1	1	1	1	1	1	1	1	1	1	1	1	2	1	1	1	1	0	1	1	1	0	1	1	1	1	1	1	1	1	1	1	1	1	1	1	1	1	1	1	1	1	1	1	1	1	1	1	1
OG0001036	1	0	0	1	1	1	0	1	1	1	1	1	1	1	1	1	1	0	1	1	3	1	1	1	1	0	0	1	1	1	1	1	1	1	1	1	1	1	1	2	1	1	1	2	1	1	1	1	1
OG0001037	1	1	1	1	1	1	1	0	1	1	1	1	2	2	1	2	1	0	1	1	1	0	1	2	2	1	2	1	2	2	1	2	1	0	0	1	1	0	0	1	1	0	1	1	1	2	0	1	1
OG0001038	1	1	1	1	1	1	1	1	1	1	1	0	1	1	1	1	1	0	1	1	1	0	1	0	1	1	1	1	1	1	1	2	1	1	1	1	1	1	1	1	1	1	1	1	1	1	1	1	1
OG0001039	1	1	1	1	1	2	1	1	1	1	1	1	1	1	1	1	1	0	1	1	1	0	1	1	1	0	1	1	1	1	1	1	0	1	1	1	1	1	1	1	1	1	1	2	1	1	1	0	1
OG0001040	1	1	1	1	1	1	1	1	1	1	1	1	1	1	1	1	1	1	1	1	1	0	1	1	1	1	1	1	1	1	1	1	1	1	1	1	1	1	1	1	1	1	1	1	1	1	1	1	1
OG0001041	1	1	1	1	1	1	1	1	1	1	1	1	1	1	1	1	1	1	1	1	1	0	1	1	1	1	1	1	1	2	1	2	1	1	1	1	1	1	1	1	1	1	1	1	1	1	1	1	1
OG0001042	1	1	1	1	1	1	1	1	1	1	1	0	1	1	1	1	1	1	1	1	1	0	1	2	1	1	1	1	1	1	2	1	1	1	1	1	1	1	1	1	1	1	1	1	1	1	1	1	1
OG0001043	1	1	1	1	1	1	1	1	1	1	1	1	1	1	1	1	1	1	1	1	1	0	1	1	1	1	1	1	1	1	1	1	1	1	1	1	1	1	1	1	1	1	1	1	1	1	1	1	1
OG0001044	1	1	1	1	1	1	1	1	1	1	1	1	1	1	1	1	1	0	1	1	1	1	0	1	1	1	1	1	1	0	1	1	1	1	1	1	1	1	1	1	1	1	1	1	1	1	1	1	1
OG0001045	1	1	1	1	1	1	1	1	1	1	1	1	1	2	1	1	1	0	1	1	1	1	0	1	0	1	1	1	0	1	1	1	1	1	1	1	0	1	0	1	1	1	0	1	1	1	1	1	1
OG0001046	1	1	1	1	1	1	1	1	1	1	1	1	1	1	1	1	1	1	1	1	1	1	1	1	1	1	1	1	1	1	1	1	1	1	1	1	1	1	1	1	1	1	1	1	1	1	1	1	1
OG0001047	1	1	1	1	1	1	0	1	1	1	1	0	1	1	1	1	1	0	1	1	1	1	1	1	1	1	1	1	1	1	1	1	1	1	1	1	1	1	1	1	1	1	1	1	1	1	1	1	1
OG0001048	1	1	1	1	1	1	0	1	1	1	1	0	1	1	1	1	1	1	1	1	1	0	1	1	1	1	0	1	1	1	1	1	1	1	1	1	1	1	1	1	1	1	1	1	1	1	1	1	1
OG0001049	1	1	1	1	1	1	1	1	1	1	1	0	1	1	1	1	1	1	1	1	1	1	1	1	1	1	2	1	1	1	1	1	1	1	1	1	1	1	1	1	1	1	1	1	1	1	1	1	1
OG0001050	1	1	1	1	1	1	1	1	1	1	1	1	1	1	1	1	1	1	1	1	1	1	1	1	1	1	1	1	1	1	1	1	1	1	1	1	1	1	1	1	1	1	1	1	1	1	1	1	1
OG0001051	1	1	1	1	1	1	1	1	1	1	1	1	1	1	1	1	1	0	1	1	1	1	1	0	1	1	2	1	1	1	1	0	1	1	2	1	1	1	1	1	1	1	1	1	1	1	1	1	1
OG0001052	1	1	0	1	1	1	1	0	1	1	1	1	1	1	1	0	1	2	1	1	1	0	1	1	1	0	1	1	1	1	1	1	1	1	0	1	1	1	1	1	1	1	1	1	1	1	1	1	1
OG0001053	1	1	1	1	1	1	1	1	1	1	1	0	1	1	1	1	1	1	1	1	1	1	1	1	0	1	1	1	1	1	1	1	1	1	1	1	1	1	1	1	1	1	1	1	1	1	1	1	1
OG0001054	1	1	1	1	1	1	1	1	1	1	1	0	1	1	1	1	1	1	1	1	1	1	1	1	1	1	1	1	1	0	1	1	1	1	1	1	1	1	1	1	1	1	1	1	1	1	1	1	1
OG0001055	1	1	1	0	1	1	1	1	1	1	1	1	1	1	1	1	1	1	1	1	1	1	1	1	1	1	1	1	1	1	1	1	1	1	1	1	1	1	1	1	1	1	1	1	1	1	1	1	1
OG0001056	1	1	1	1	1	1	1	1	1	1	1	0	1	1	1	1	1	1	1	1	1	0	1	1	1	1	1	1	1	2	1	1	1	1	1	1	1	1	1	1	1	1	1	1	1	1	1	1	1
OG0001057	1	1	1	1	1	1	1	1	1	1	1	0	1	1	1	1	1	1	1	1	1	0	1	1	1	1	1	1	1	1	1	1	1	1	1	1	1	1	1	1	1	1	1	1	1	1	1	1	1
OG0001058	1	1	1	1	1	1	1	1	1	1	1	0	1	1	1	1	1	0	1	1	1	0	0	1	1	1	1	1	1	1	1	1	1	1	1	1	1	1	1	1	1	1	1	1	1	1	1	1	1
OG0001059	1	1	1	1	1	1	1	1	1	1	1	0	1	1	1	1	1	2	1	1	1	0	1	1	1	0	1	1	1	1	1	2	1	1	1	1	1	1	1	1	1	1	1	1	1	1	1	1	1
OG0001060	1	1	1	1	1	1	1	1	1	1	1	1	1	1	1	1	1	1	1	1	1	1	1	1	1	1	1	1	1	1	1	1	1	1	1	1	1	1	1	1	1	1	1	1	1	1	1	1	1
OG0001061	1	1	1	1	1	1	1	1	1	1	1	1	1	1	1	1	1	0	1	1	1	1	1	1	1	1	0	1	1	1	1	1	1	1	1	1	1	1	1	1	1	1	1	1	1	1	1	1	1
OG0001062	1	1	1	1	1	1	1	1	1	1	1	0	1	1	1	1	1	0	1	1	1	1	1	1	1	1	1	1	1	1	1	1	1	2	1	1	1	1	1	1	1	1	1	1	1	1	1	1	1
OG0001063	1	1	0	1	1	1	1	1	1	1	1	0	1	1	1	1	1	1	1	1	1	0	1	0	2	1	1	1	1	1	1	1	1	1	1	1	1	0	1	1	1	0	1	1	1	1	1	1	2
OG0001064	0	4	3	2	3	0	4	0	1	1	4	0	0	0	1	0	1	2	6	0	0	0	3	0	0	4	0	0	0	0	2	0	2	0	0	0	1	0	1	1	0	0	0	1	0	0	0	1	0
OG0001065	0	16	11	0	1	0	6	0	0	0	0	0	0	0	0	0	0	0	55	0	0	0	2	0	0	18	0	0	0	0	0	0	0	0	0	0	0	0	0	0	0	0	0	0	0	0	0	0	0
OG0001066	0	2	2	1	1	3	2	0	2	1	2	0	1	1	1	1	2	0	0	1	1	0	1	1	0	1	0	0	1	1	1	1	1	0	0	1	1	2	1	0	2	2	1	1	1	1	0	2	1
OG0001067	0	0	1	1	0	2	0	0	1	0	4	0	0	1	0	5	0	0	10	0	0	0	0	0	0	0	0	8	1	0	0	0	1	0	1	0	0	2	1	0	0	23	0	5	1	0	0	2	0
OG0001068	1	1	1	1	1	1	1	1	1	1	1	1	1	1	1	1	1	0	1	1	1	1	1	1	1	1	1	1	1	1	1	1	1	1	1	1	1	1	1	1	1	1	1	1	1	1	1	1	1
OG0001069	1	1	1	1	1	1	1	1	1	1	1	0	1	1	1	1	1	1	1	1	1	1	1	1	1	1	1	1	1	0	1	0	1	1	1	1	1	1	1	1	1	1	1	1	1	1	1	1	1
OG0001070	1	2	1	1	1	1	1	2	1	1	2	0	1	1	1	1	1	0	1	1	1	0	1	1	2	2	1	1	1	1	1	1	1	0	2	1	1	0	1	1	1	0	1	1	1	1	0	1	2
OG0001071	1	1	1	1	1	1	1	1	1	1	1	0	1	1	1	1	1	1	1	1	1	0	1	1	1	1	1	1	1	1	1	1	1	1	1	1	1	1	1	1	1	1	1	1	1	1	1	1	1
OG0001072	1	1	1	1	1	1	1	1	1	1	1	0	1	1	1	1	1	1	1	1	1	1	1	1	1	1	1	1	1	1	1	0	1	1	1	1	1	1	1	1	1	1	1	1	1	1	1	1	1
OG0001073	1	1	1	1	1	1	1	1	1	1	1	1	1	1	1	1	1	1	1	1	1	0	1	1	1	0	1	1	1	1	1	1	1	1	1	1	1	1	1	1	1	1	1	1	1	1	1	1	1
OG0001074	1	1	1	1	1	1	1	1	1	1	1	1	1	1	1	1	1	0	1	1	1	1	1	1	1	1	1	1	1	1	1	1	1	1	1	1	1	1	1	1	1	1	1	1	1	1	1	1	1
OG0001075	1	1	1	1	1	1	1	1	1	1	1	1	1	1	1	0	1	0	1	1	1	1	0	1	1	1	1	1	1	1	1	1	1	1	1	1	1	1	1	1	1	1	1	1	1	1	1	1	1
OG0001076	1	1	1	1	1	1	0	1	1	1	1	0	1	1	1	1	1	0	1	1	1	0	0	1	1	1	1	1	1	1	1	1	1	1	1	1	1	1	1	1	1	1	1	1	1	1	1	1	1
OG0001077	2	6	4	0	1	0	5	0	1	1	2	1	1	1	1	1	2	1	2	0	1	0	1	1	1	5	0	0	1	1	1	1	3	0	0	0	0	3	0	0	1	3	1	1	0	1	0	1	0
OG0001078	1	1	1	1	1	1	1	1	1	1	1	1	1	1	1	1	1	0	1	1	1	1	1	1	1	1	0	1	1	1	1	1	1	1	1	1	1	1	1	1	1	1	1	1	1	1	1	1	2
OG0001079	1	1	1	1	1	1	1	1	1	1	1	0	1	1	0	1	1	0	1	0	1	1	1	1	1	1	0	1	1	2	2	1	1	1	0	1	2	1	1	1	1	1	1	1	1	1	1	1	1
OG0001080	1	1	1	1	1	1	1	1	1	1	1	0	1	1	1	1	1	1	1	1	1	0	1	1	1	1	1	1	1	1	0	1	1	1	1	1	1	1	1	1	1	1	1	1	1	1	1	1	1
OG0001081	1	1	1	1	1	1	1	1	1	1	1	1	1	1	1	1	1	0	1	1	1	1	1	1	1	1	1	1	1	1	1	1	1	1	1	1	1	1	1	1	1	1	1	1	1	1	1	1	1
OG0001082	1	1	1	1	1	1	1	1	1	2	1	1	1	1	1	0	1	1	1	1	1	1	1	1	1	1	1	1	1	1	1	0	1	1	1	1	1	1	1	1	1	1	1	1	1	1	1	1	1
OG0001083	1	1	1	0	1	2	1	1	1	1	1	0	1	1	1	1	1	0	1	1	1	1	1	1	1	1	1	1	1	1	1	0	1	1	0	1	1	1	1	1	1	1	1	1	1	1	0	1	1
OG0001084	1	1	1	1	1	1	1	1	1	1	1	0	0	1	1	1	1	1	1	1	1	1	1	1	1	1	1	1	1	1	1	1	1	1	1	1	1	1	1	1	1	1	1	1	1	1	1	1	1
OG0001085	1	1	1	0	1	1	1	1	1	1	1	1	1	1	1	1	1	0	1	1	1	0	0	1	1	1	1	1	1	0	1	0	1	1	0	1	1	1	2	1	1	1	1	1	1	1	1	1	1
OG0001086	1	1	1	1	1	1	1	1	1	1	1	1	0	1	1	1	1	0	2	1	1	0	0	2	1	1	0	1	1	1	1	1	1	1	1	1	1	1	1	1	1	1	1	1	1	1	1	1	1
OG0001087	1	1	1	1	1	1	1	1	1	1	1	1	1	1	1	1	1	1	1	1	1	1	0	1	1	1	1	1	1	1	1	1	1	1	1	1	1	1	1	1	1	1	1	1	1	1	1	1	1
OG0001088	1	1	1	1	1	2	0	0	0	2	1	2	1	3	0	1	2	0	1	0	2	1	0	0	2	1	1	2	1	0	2	0	0	1	0	0	0	0	0	2	2	0	1	2	2	1	1	0	0
OG0001089	1	1	0	1	1	1	0	1	1	1	1	1	1	1	1	1	2	1	1	1	1	1	1	1	1	1	1	1	1	1	1	1	1	1	1	1	1	1	1	1	1	1	1	1	1	1	1	1	1
OG0001090	1	1	1	1	1	1	0	1	1	1	1	1	1	1	1	1	1	1	1	1	1	1	1	1	1	1	1	1	1	1	1	1	1	1	1	1	1	1	1	1	1	1	1	1	1	1	1	1	1
OG0001091	1	1	1	1	1	1	0	1	1	1	1	1	1	1	1	1	1	1	1	1	1	1	1	1	1	1	1	1	1	1	1	1	1	1	1	1	1	1	1	1	1	1	1	1	1	1	1	1	1
OG0001092	1	1	1	1	1	1	0	1	1	1	1	1	1	1	1	1	1	1	1	1	1	0	1	1	1	1	1	1	1	1	1	1	1	1	1	1	1	1	1	1	1	1	1	1	1	1	1	1	1
OG0001093	1	1	0	1	1	1	0	1	1	1	1	1	1	1	1	1	1	1	1	1	1	1	1	1	1	1	1	1	1	1	1	1	1	1	1	1	1	1	1	1	1	1	1	1	1	1	1	1	1
OG0001094	1	1	1	1	1	1	1	1	1	1	1	0	1	1	1	1	1	1	1	1	1	1	1	1	1	1	1	1	1	1	1	1	1	1	1	1	1	1	1	1	1	1	1	1	1	1	1	1	1
OG0001095	1	1	1	1	1	1	1	1	1	1	1	0	1	1	1	1	1	1	1	1	1	1	1	1	1	1	1	1	1	1	1	1	1	1	1	1	1	1	1	1	1	1	1	1	1	1	1	1	1
OG0001096	1	1	1	1	1	1	1	1	1	2	1	0	1	1	1	1	1	1	1	1	1	1	1	1	1	1	1	1	1	1	1	1	1	1	1	1	1	1	1	1	1	1	1	1	1	1	1	1	1
OG0001097	1	1	1	1	1	1	1	1	1	1	1	0	1	1	1	1	1	1	1	1	1	0	1	1	1	1	1	1	1	1	1	1	1	1	1	1	1	1	1	1	1	1	1	1	1	1	1	1	1
OG0001098	1	1	1	1	1	1	1	1	1	1	1	1	1	1	1	1	1	1	1	1	1	1	1	1	1	1	1	1	1	1	1	1	1	1	1	1	1	1	1	1	1	1	1	1	1	1	1	1	1
OG0001099	1	1	1	1	1	1	1	1	1	1	1	1	1	1	1	0	1	1	1	1	1	1	1	1	1	1	1	1	1	1	1	1	1	1	1	1	1	1	1	1	1	1	1	1	1	1	1	1	1
OG0001100	1	1	1	1	1	1	1	1	1	1	1	0	1	1	1	1	1	2	1	1	1	1	1	1	1	1	1	1	1	1	1	1	1	1	0	1	1	1	1	1	1	1	1	1	1	1	0	1	1
OG0001101	1	1	0	1	1	1	0	1	1	1	1	0	1	1	1	1	1	0	1	1	1	1	1	1	1	1	1	1	1	1	1	1	1	1	1	1	1	1	1	1	1	1	1	1	1	1	1	1	1
OG0001102	1	1	1	1	1	1	1	1	1	1	1	0	1	1	1	1	1	0	1	1	1	0	1	1	1	1	1	1	1	1	1	1	1	1	1	1	1	1	1	1	1	1	1	1	1	1	1	1	1
OG0001103	1	1	1	1	1	1	1	1	1	1	1	0	1	1	1	1	1	1	1	1	1	1	1	1	1	1	1	1	1	1	1	0	1	1	1	1	1	1	1	1	1	1	1	1	1	1	1	1	1
OG0001104	1	1	1	0	1	1	1	0	1	1	1	0	1	1	1	1	1	1	1	1	1	0	1	1	1	1	1	1	1	1	1	1	1	1	1	1	1	1	1	1	1	1	1	1	1	1	1	1	1
OG0001105	1	1	1	0	1	1	1	1	1	1	1	0	1	1	1	1	1	0	1	1	1	1	1	1	1	1	1	1	1	1	1	1	1	1	1	1	1	1	1	1	1	1	1	1	1	1	1	1	2
OG0001106	1	1	1	1	1	1	0	1	1	1	1	0	1	1	1	1	1	1	1	1	1	1	1	1	1	1	1	1	1	1	1	1	1	1	1	1	1	1	1	1	1	1	1	1	1	1	1	1	1
OG0001107	1	1	0	1	1	1	0	1	1	1	1	1	1	1	1	1	1	1	1	1	1	1	1	0	2	1	1	1	1	1	1	1	1	1	1	1	1	1	1	1	1	1	1	1	1	1	1	1	2
OG0001108	1	1	1	0	1	1	1	1	1	1	1	0	1	1	1	1	1	1	1	1	1	1	1	1	1	1	1	1	1	1	1	1	1	1	1	1	1	1	1	1	1	1	1	1	1	1	1	1	1
OG0001109	1	1	1	1	1	1	1	0	1	1	1	1	1	1	1	1	1	0	1	1	2	1	1	1	1	1	1	1	1	1	1	1	1	1	1	1	1	1	1	1	1	1	1	1	1	1	1	1	1
OG0001110	1	1	1	1	1	1	1	1	1	1	1	0	1	1	1	1	1	0	1	1	0	1	1	1	1	1	1	1	1	1	1	1	1	1	1	1	1	1	1	1	1	1	1	1	1	1	1	1	1
OG0001111	1	1	1	1	1	1	0	1	1	1	1	1	1	1	1	1	1	1	1	1	1	1	1	1	1	1	1	1	1	1	1	0	1	1	1	1	1	1	1	1	1	1	1	1	1	1	1	1	1
OG0001112	1	1	1	1	1	1	1	1	1	1	1	0	1	1	1	1	1	1	1	1	1	0	1	1	1	1	1	1	1	0	1	1	1	1	1	1	1	1	1	1	1	1	1	1	1	1	1	1	1
OG0001113	1	0	1	1	1	1	1	1	1	1	1	0	1	1	1	1	2	2	1	1	1	1	0	1	1	1	2	1	1	1	1	1	1	1	1	1	1	1	1	1	1	1	1	1	1	1	1	1	1
OG0001114	1	1	1	1	1	1	1	1	1	1	1	1	1	1	1	1	1	2	1	1	1	1	1	1	1	1	1	1	1	1	1	1	1	1	1	1	1	2	1	1	1	2	1	1	1	1	1	1	1
OG0001115	1	1	1	1	1	1	1	1	1	1	1	1	1	1	1	1	1	0	1	1	1	1	1	1	1	1	1	1	1	1	1	1	1	1	1	1	1	1	1	1	1	1	1	1	1	1	1	1	1
OG0001116	2	1	1	1	1	1	1	1	1	1	1	1	1	1	1	1	1	0	1	1	1	1	1	0	1	1	0	1	1	1	1	1	1	1	1	1	1	1	1	1	1	1	1	1	1	2	1	1	1
OG0001117	1	1	1	1	1	1	1	1	1	1	1	0	1	1	1	1	1	1	1	1	1	0	1	1	1	1	1	1	1	0	1	1	1	1	1	1	1	1	1	1	1	1	1	1	1	1	1	1	1
OG0001118	1	1	1	1	1	1	1	1	1	1	1	0	1	1	1	1	1	0	1	1	1	1	1	1	1	1	1	1	1	1	1	1	1	1	1	1	1	1	1	1	1	1	1	1	1	1	1	1	1
OG0001119	1	1	1	0	1	1	1	1	1	1	1	0	1	1	1	1	1	1	1	1	1	1	0	1	1	1	1	1	1	1	1	1	1	1	1	1	1	1	1	1	1	1	1	1	1	1	1	1	1
OG0001120	1	5	1	0	2	3	1	0	0	1	0	0	0	0	2	2	3	0	6	0	0	0	2	1	0	2	0	0	0	0	6	0	0	0	0	0	0	0	1	0	0	0	2	0	2	4	0	0	1
OG0001121	1	1	0	2	1	1	0	0	1	1	1	0	1	1	1	1	1	0	1	1	1	0	2	1	1	1	2	1	1	0	1	1	1	1	1	1	1	1	1	1	1	1	1	1	1	1	1	1	1
OG0001122	1	1	1	1	1	1	1	1	1	1	1	0	1	1	1	1	1	0	1	1	1	0	1	1	1	1	1	1	1	1	1	1	1	1	1	1	1	1	1	1	1	1	1	1	1	1	1	1	1
OG0001123	1	1	1	0	1	1	1	1	1	1	1	0	1	1	1	1	1	3	1	1	1	0	1	1	2	1	1	1	1	1	1	1	1	1	1	0	0	1	1	1	1	1	1	1	1	1	1	1	2
OG0001124	1	1	1	1	1	1	1	1	1	1	1	0	1	1	1	1	1	1	1	1	1	0	1	1	1	1	1	1	1	1	1	1	1	1	1	1	1	1	1	1	1	1	1	1	1	1	1	1	1
OG0001125	1	0	0	0	1	1	0	1	1	1	1	0	1	1	1	1	2	0	1	1	1	1	1	1	1	1	1	1	1	1	2	1	1	1	1	1	1	2	1	1	1	2	1	1	1	1	1	1	1
OG0001126	1	1	1	1	1	1	1	1	1	1	1	0	1	1	1	0	1	1	1	1	1	1	1	1	1	1	0	1	1	0	1	1	1	1	2	1	1	1	1	1	1	1	1	1	1	1	1	1	1
OG0001127	1	1	1	1	1	1	1	1	1	1	1	0	1	0	1	1	2	0	1	1	1	0	1	1	1	1	0	1	1	0	1	0	1	1	2	1	1	1	1	3	1	1	1	1	1	1	1	1	1
OG0001128	1	2	1	1	1	1	2	1	1	1	1	1	1	1	1	1	1	1	1	1	1	0	1	1	1	2	1	1	1	1	1	1	1	0	1	1	1	1	1	1	1	1	1	1	1	1	0	1	1
OG0001129	1	1	1	1	1	1	1	1	1	1	1	0	1	1	1	1	1	1	2	1	1	0	1	1	1	1	1	1	1	1	1	1	1	1	1	0	1	1	1	1	1	1	1	1	1	1	1	1	1
OG0001130	1	1	1	1	1	1	1	1	1	1	1	0	1	1	1	1	1	1	1	1	1	1	1	1	1	1	1	1	1	1	1	1	1	1	1	1	1	1	1	1	1	1	1	1	1	1	1	1	1
OG0001131	1	1	1	1	1	1	1	1	1	1	1	1	1	1	1	1	1	1	1	1	1	0	1	1	1	1	1	1	1	1	1	1	1	1	1	1	1	1	1	1	1	1	1	1	1	1	1	1	1
OG0001132	1	1	1	1	1	1	1	1	1	1	1	0	1	1	1	1	1	0	1	1	1	1	1	0	1	1	1	1	1	2	1	1	1	1	1	1	1	1	1	1	1	1	1	1	1	1	1	1	1
OG0001133	1	1	1	1	1	1	1	1	1	1	1	0	1	1	2	1	1	1	1	1	1	1	1	1	1	1	0	1	1	1	1	0	1	0	1	1	1	1	1	1	1	1	1	1	1	1	1	1	1
OG0001134	1	1	1	1	1	1	1	1	1	1	1	0	1	1	1	1	1	1	1	1	1	1	1	1	1	1	0	1	1	0	1	0	1	1	1	1	1	1	1	1	1	1	1	1	1	1	1	1	1
OG0001135	1	1	1	1	1	1	1	1	1	1	1	1	0	1	1	1	1	0	2	1	2	1	1	1	1	1	1	1	0	0	1	0	1	1	1	0	0	1	2	1	1	1	1	2	1	1	1	1	1
OG0001136	1	1	1	1	1	1	1	1	1	1	1	1	1	1	1	1	1	0	2	1	1	0	1	1	1	1	1	1	1	2	1	1	1	1	0	1	1	1	1	1	1	1	1	1	1	1	1	1	1
OG0001137	1	1	1	1	1	1	1	1	1	1	1	1	1	1	1	1	1	0	1	1	1	1	1	1	1	1	1	1	1	1	1	1	1	1	1	1	1	1	1	1	1	1	1	1	1	1	1	1	1
OG0001138	1	1	1	1	1	1	1	1	1	1	1	1	1	1	0	1	1	1	1	1	1	0	1	1	1	1	1	1	0	2	1	1	1	1	1	1	1	1	1	1	1	1	1	1	1	1	1	1	1
OG0001139	1	1	1	1	1	1	1	2	1	1	1	1	1	1	1	1	1	0	1	1	1	0	1	1	1	1	0	1	1	1	1	1	1	1	1	1	1	1	1	1	1	1	1	1	1	1	1	1	1
OG0001140	1	1	1	1	1	1	0	1	1	1	1	0	1	1	1	1	1	1	1	1	1	0	2	1	1	1	1	1	1	1	1	1	1	1	1	1	1	1	1	1	1	1	1	1	1	1	1	1	1
OG0001141	1	1	1	1	1	1	1	1	1	1	1	0	1	1	1	1	1	0	1	1	1	0	2	1	1	0	2	1	2	1	1	1	1	1	1	1	1	1	1	1	1	1	1	1	1	1	1	1	1
OG0001142	1	1	1	1	1	1	1	2	1	1	1	0	1	1	1	1	1	1	1	1	1	1	1	1	1	1	1	1	1	1	1	1	1	1	1	1	1	1	1	1	1	1	1	1	1	1	1	1	1
OG0001143	1	1	1	0	1	1	1	1	1	1	1	0	1	1	1	1	1	1	1	1	1	1	1	1	1	1	1	1	1	1	1	1	1	1	1	1	1	1	1	1	1	1	1	1	1	1	1	1	1
OG0001144	1	1	1	0	1	1	1	1	1	1	1	1	1	1	1	1	1	0	1	1	1	0	1	1	1	1	1	1	1	0	1	1	1	1	1	1	1	1	1	1	1	1	1	1	1	1	1	1	1
OG0001145	1	1	1	1	1	1	1	1	1	1	1	1	1	1	1	1	1	0	1	1	1	1	1	1	1	1	1	1	1	1	1	2	1	1	1	1	1	1	1	1	1	1	1	1	1	1	1	1	1
OG0001146	1	1	1	1	1	1	1	0	1	1	1	1	1	1	1	1	1	1	1	1	1	1	1	1	1	1	1	1	1	1	1	1	1	1	1	2	1	1	1	1	1	1	1	1	1	1	1	1	1
OG0001147	1	1	1	1	1	1	1	1	1	1	1	0	1	1	1	1	1	1	1	1	1	1	0	1	1	1	1	1	1	1	1	1	1	1	1	1	1	1	1	1	1	1	1	1	1	1	1	1	1
OG0001148	1	1	1	1	1	1	1	1	1	1	1	0	1	1	1	1	1	0	1	1	1	0	1	1	1	1	1	1	1	1	1	1	1	1	1	1	1	1	1	1	1	1	1	1	1	1	1	1	1
OG0001149	1	1	1	1	1	1	1	1	1	1	1	1	1	1	1	1	1	1	1	1	1	1	1	1	1	1	1	1	2	1	1	1	1	1	1	1	1	1	1	1	1	2	1	1	1	1	1	1	1
OG0001150	1	1	1	1	1	1	1	1	1	1	1	0	1	1	1	1	1	1	1	1	1	1	1	1	1	1	2	1	1	1	1	1	1	1	1	1	1	1	1	1	1	1	1	1	1	1	1	1	1
OG0001151	1	1	1	1	1	1	1	1	1	1	1	0	1	1	1	1	1	1	1	1	1	1	1	1	1	1	1	1	1	1	1	1	1	1	1	1	1	1	1	1	1	1	1	1	1	1	1	1	1
OG0001152	1	1	1	0	1	1	0	1	1	1	1	0	1	1	1	1	1	1	1	1	1	0	1	1	1	1	1	1	1	0	1	1	1	2	1	1	1	1	1	1	1	1	1	1	1	1	1	1	1
OG0001153	1	1	1	1	1	1	1	1	1	1	1	0	1	1	1	1	1	0	1	1	1	1	1	1	1	1	1	1	1	0	2	1	1	1	1	1	1	1	1	1	1	1	1	1	1	1	1	1	1
OG0001154	1	1	1	1	1	1	1	1	1	1	1	1	1	1	1	0	1	1	1	1	1	0	1	1	1	1	0	1	1	1	1	1	1	1	1	1	1	1	1	1	1	1	1	1	1	1	1	1	1
OG0001155	1	1	1	1	1	1	1	1	1	1	1	1	1	1	1	1	1	0	1	1	1	0	1	1	1	1	1	1	1	1	1	1	1	1	0	1	1	1	1	1	1	1	1	1	1	1	1	1	1
OG0001156	1	1	1	1	1	1	1	1	1	1	1	1	1	1	1	1	1	0	1	1	1	1	1	1	1	1	1	1	1	1	1	1	1	1	1	1	1	1	1	1	1	1	1	1	1	1	1	1	1
OG0001157	1	1	1	1	1	1	1	1	1	1	1	1	1	1	1	1	1	0	1	1	1	0	1	1	1	1	1	2	1	1	1	1	1	1	1	1	1	1	1	1	1	1	1	1	1	1	1	1	1
OG0001158	1	1	1	1	1	1	1	1	1	1	1	0	1	1	1	1	2	0	1	1	1	1	1	1	1	1	1	1	1	1	1	1	1	1	1	1	1	1	1	1	1	1	1	1	1	1	1	1	1
OG0001159	1	1	1	1	1	1	1	1	1	1	1	1	1	1	1	0	1	1	1	1	1	0	1	1	1	1	1	1	1	1	1	0	1	1	1	1	1	1	1	1	1	1	1	1	1	1	1	1	1
OG0001160	1	1	1	1	1	1	1	1	1	1	1	1	1	1	1	1	1	0	1	1	1	0	0	1	1	1	1	1	1	1	1	0	1	1	1	1	1	1	1	1	1	1	1	1	1	1	1	1	1
OG0001161	2	4	0	0	0	1	2	0	0	4	0	0	0	0	1	0	0	0	3	0	4	0	0	0	0	3	0	3	0	0	0	0	0	0	1	1	0	0	3	4	0	0	0	5	0	0	0	0	1
OG0001162	3	1	1	0	2	1	1	0	1	1	1	1	1	1	2	1	2	0	2	0	1	0	4	2	1	1	1	1	1	1	1	1	2	0	0	0	0	0	0	1	2	1	2	1	1	1	0	1	0
OG0001163	1	1	1	1	1	1	0	1	1	1	1	1	1	1	1	1	1	1	1	1	1	1	2	1	1	1	1	1	1	1	1	1	1	1	1	1	1	1	1	1	1	1	1	1	1	1	1	1	1
OG0001164	1	1	1	1	1	1	0	1	1	1	1	0	1	1	1	1	1	0	1	1	1	1	1	1	1	1	1	1	1	1	1	1	1	1	1	1	1	1	1	1	1	1	1	1	1	1	1	1	1
OG0001165	1	1	0	1	1	1	1	1	1	1	1	0	1	1	1	1	1	1	1	1	1	0	1	1	1	1	1	1	1	1	1	0	1	1	1	1	1	1	1	1	1	1	1	1	1	1	1	1	1
OG0001166	1	1	1	1	1	1	1	1	1	1	1	0	1	1	1	1	1	0	1	1	1	0	1	1	1	1	1	1	1	1	1	1	1	1	1	1	1	1	1	1	1	1	1	1	1	1	1	1	1
OG0001167	1	1	1	1	1	1	1	1	1	1	1	1	1	1	1	1	0	1	1	1	1	0	1	1	1	1	1	1	1	1	1	1	1	1	1	1	1	1	1	1	1	1	1	1	1	1	1	1	1
OG0001168	1	1	1	1	1	1	0	1	1	1	1	0	1	1	1	1	1	0	1	1	1	0	1	0	1	1	1	1	1	1	2	1	1	1	1	1	1	1	1	1	1	1	1	1	1	1	1	1	1
OG0001169	1	1	1	1	1	1	0	1	1	1	1	1	1	1	1	1	1	1	1	1	1	1	1	1	1	1	1	1	1	1	1	1	1	1	1	1	1	1	1	1	1	1	1	1	1	1	1	1	1
OG0001170	1	1	1	1	1	1	0	1	1	1	1	1	1	1	1	1	1	1	1	1	1	1	1	1	1	1	1	1	1	1	1	1	1	1	1	1	1	1	1	1	1	1	1	1	1	1	1	1	1
OG0001171	1	1	1	1	1	1	1	1	1	1	1	0	1	1	1	1	1	2	1	1	1	0	1	1	1	1	0	1	1	0	2	0	1	1	1	1	1	1	1	1	1	1	1	1	1	1	1	1	1
OG0001172	1	1	1	1	1	1	1	1	1	1	1	1	1	1	1	1	1	1	1	1	1	1	1	1	1	0	1	1	1	1	1	1	1	1	1	1	1	1	1	1	1	1	1	1	1	1	1	1	1
OG0001173	1	1	1	1	1	2	0	1	1	1	1	0	1	1	0	0	1	0	1	1	1	0	1	1	1	1	1	2	1	1	1	1	1	1	1	0	0	1	1	1	1	1	1	1	2	1	1	1	1
OG0001174	1	1	1	0	1	1	1	1	1	1	1	0	1	1	2	1	1	1	1	1	1	0	2	1	1	1	1	1	1	0	1	1	1	1	1	1	1	1	1	1	1	1	1	1	1	1	1	1	1
OG0001175	1	1	0	1	1	1	0	1	1	1	1	0	1	1	1	1	1	1	1	1	1	1	1	1	1	1	0	1	1	1	1	1	1	1	1	1	1	1	1	1	1	1	1	1	1	1	1	1	1
OG0001176	1	1	0	1	1	1	0	1	1	1	1	0	1	1	1	1	1	1	1	1	1	1	1	1	1	1	1	1	1	1	1	1	1	1	1	1	1	1	1	1	1	1	1	1	1	1	1	1	1
OG0001177	1	1	1	1	1	1	1	1	1	1	1	0	1	1	1	1	1	1	1	1	1	1	1	1	1	1	0	1	1	1	1	0	1	1	1	1	1	1	1	1	1	1	1	1	1	1	1	1	1
OG0001178	1	1	1	0	1	1	1	1	1	1	1	0	1	1	1	1	1	1	1	1	1	0	1	1	1	1	1	1	1	0	0	0	1	1	1	1	1	1	1	1	1	1	0	1	1	1	1	1	1
OG0001179	1	1	1	0	1	1	1	1	1	1	1	0	1	1	1	1	1	1	1	1	1	0	1	1	1	1	1	1	1	0	1	1	1	1	1	1	1	1	1	1	1	1	1	1	1	1	1	1	1
OG0001180	1	1	1	1	1	1	1	1	1	1	1	0	1	1	1	1	1	1	1	1	1	1	1	1	1	1	1	1	1	1	1	0	1	1	1	1	1	1	1	1	1	1	1	1	1	1	1	1	1
OG0001181	1	1	1	1	1	1	1	1	1	1	1	0	1	1	1	1	1	1	1	1	1	1	1	1	1	1	1	1	1	1	1	1	1	1	1	1	1	1	1	1	1	1	1	1	1	1	1	1	1
OG0001182	1	1	1	1	1	1	1	1	1	1	1	0	1	1	1	1	1	0	1	1	1	1	0	0	1	1	1	1	1	1	1	1	1	1	1	1	1	1	1	1	1	1	1	1	1	1	1	1	1
OG0001183	1	1	1	2	1	1	1	1	1	1	1	1	1	1	1	1	1	0	1	1	1	0	1	1	1	1	1	1	1	1	1	1	1	1	1	1	1	0	1	1	1	0	1	1	1	1	1	1	1
OG0001184	1	1	1	0	1	1	1	1	1	1	1	0	1	1	1	1	1	1	1	1	1	1	1	1	1	1	1	1	1	1	1	1	1	1	1	1	1	1	1	1	1	1	1	1	1	1	1	1	1
OG0001185	1	1	1	0	1	1	1	1	1	0	1	1	1	1	1	2	1	1	1	1	1	1	1	1	1	1	1	1	1	1	1	1	1	1	1	1	1	1	1	1	1	1	1	1	1	1	1	1	1
OG0001186	1	1	1	1	1	1	1	1	1	1	1	1	1	1	1	1	1	0	1	1	1	1	1	1	1	1	1	1	1	0	1	1	1	1	1	1	1	1	1	1	1	1	1	1	1	1	1	1	1
OG0001187	1	1	1	1	1	1	1	1	1	1	1	1	1	1	1	1	1	1	1	1	1	0	1	1	1	1	1	1	1	1	1	1	1	1	1	1	1	1	1	1	1	1	1	1	1	1	1	1	1
OG0001188	1	1	1	1	1	1	1	1	1	1	1	1	1	1	1	1	1	0	1	1	1	1	1	1	1	1	1	1	1	1	1	1	1	1	1	1	1	1	1	1	1	1	1	1	1	1	1	1	1
OG0001189	1	1	1	1	1	1	1	1	1	1	1	1	1	1	1	1	1	0	1	1	1	0	1	1	1	1	1	1	1	1	1	1	1	1	1	1	1	1	1	1	1	1	1	1	1	1	1	1	1
OG0001190	1	1	1	1	1	1	1	1	1	1	1	1	0	1	1	1	1	0	1	1	1	1	1	1	1	1	0	1	1	1	1	1	1	1	1	1	1	1	1	1	1	1	1	1	1	1	1	1	1
OG0001191	1	1	0	1	1	1	0	1	1	1	1	0	1	1	1	1	1	0	1	1	1	1	1	1	1	1	1	1	1	0	1	1	1	1	1	1	1	1	1	1	1	1	1	1	1	1	1	1	1
OG0001192	1	1	1	1	1	1	1	1	1	1	1	0	1	1	1	1	1	0	1	1	1	1	1	0	1	1	1	1	1	1	1	1	1	1	1	1	1	2	1	1	1	1	1	1	1	1	1	1	1
OG0001193	1	1	1	0	1	1	1	1	1	1	1	2	1	1	1	1	1	1	1	1	1	0	1	1	1	1	0	1	1	1	1	1	1	1	1	1	1	1	1	1	1	1	1	1	1	1	1	1	1
OG0001194	1	1	1	1	1	1	1	1	1	1	1	1	1	1	2	1	1	0	1	1	1	0	0	2	1	1	0	2	1	1	1	1	1	1	0	1	1	2	1	1	1	2	1	1	2	1	1	1	1
OG0001195	1	1	1	1	0	3	1	0	1	2	1	1	0	0	1	0	5	0	1	0	2	0	0	0	0	1	0	3	0	0	0	0	1	0	0	0	0	0	1	2	3	0	1	2	2	2	1	1	1
OG0001196	1	1	1	1	1	1	1	1	1	1	1	1	1	1	1	1	1	0	1	1	1	1	1	1	1	1	1	1	1	1	1	1	1	1	1	1	0	1	1	1	1	1	1	1	1	1	1	1	1
OG0001197	1	1	1	1	1	1	1	1	1	1	1	0	1	1	1	1	1	1	1	1	1	1	1	1	1	1	1	1	1	1	1	1	1	1	1	1	1	1	1	1	1	1	1	1	1	1	1	1	1
OG0001198	1	3	4	4	1	1	2	0	0	1	2	2	1	1	0	1	1	1	2	1	1	0	1	2	0	3	0	1	1	1	2	0	1	0	1	0	0	1	0	1	1	1	0	1	1	1	0	0	1
OG0001199	1	1	1	1	1	1	1	1	1	1	1	0	1	1	1	1	1	1	1	1	1	0	1	1	1	1	1	1	1	1	1	1	1	1	1	1	1	1	1	1	1	1	1	1	1	1	1	1	1
OG0001200	1	1	1	1	2	1	1	1	1	1	1	0	1	1	1	1	1	0	1	1	1	1	2	1	1	1	1	1	1	1	1	1	2	1	0	1	1	1	1	1	1	1	1	1	1	1	1	1	1
OG0001201	1	1	1	0	1	1	1	1	1	1	1	0	1	1	1	1	1	1	1	1	1	1	1	1	1	1	1	2	0	1	1	1	1	1	1	1	1	1	1	1	1	1	1	1	1	1	1	1	1
OG0001202	1	1	1	1	1	1	1	1	1	1	1	1	1	1	1	1	1	0	1	1	1	1	1	2	1	1	1	1	1	1	1	1	1	1	1	1	1	1	1	1	1	1	1	1	1	1	1	1	1
OG0001203	1	1	1	1	1	1	1	1	1	1	1	0	1	2	1	1	1	0	1	1	1	1	0	1	1	1	1	1	1	1	1	1	1	1	1	1	1	1	1	1	1	1	1	1	1	1	1	1	1
OG0001204	1	1	1	1	1	1	1	1	1	1	1	0	1	1	1	1	1	2	1	1	1	0	1	1	1	1	1	1	1	1	1	1	1	1	1	1	1	1	1	1	1	1	1	1	1	1	1	1	1
OG0001205	1	3	2	0	3	1	2	1	2	1	3	0	1	1	1	1	1	0	2	0	1	0	3	1	1	3	1	1	1	1	1	1	1	0	1	1	1	0	0	1	1	0	1	1	1	1	0	2	1
OG0001206	1	1	1	1	1	1	1	1	1	1	1	0	1	1	1	0	1	2	1	1	1	1	1	1	1	1	0	1	1	0	1	1	1	1	1	1	1	1	1	1	1	1	1	1	1	1	1	1	1
OG0001207	1	1	1	1	1	1	0	1	1	1	1	1	1	1	1	1	1	0	1	1	1	1	1	2	1	1	1	1	1	1	1	1	1	2	0	1	1	1	1	1	1	1	1	1	1	1	1	1	1
OG0001208	1	1	1	1	1	1	1	1	1	1	1	0	1	2	1	1	1	0	1	1	1	1	1	1	1	1	1	1	1	1	1	0	1	1	1	1	1	1	1	1	1	1	1	1	1	1	1	1	1
OG0001209	1	1	1	1	1	1	1	1	1	1	1	0	1	1	1	1	1	1	1	1	1	0	1	1	1	1	1	1	1	1	1	0	1	1	1	1	1	1	1	1	1	1	1	1	1	1	1	1	1
OG0001210	1	1	1	1	1	1	1	1	1	1	1	1	1	1	1	1	1	0	1	1	1	0	1	1	1	1	1	1	1	1	1	1	1	1	1	1	1	1	1	1	1	1	1	1	1	1	1	1	1
OG0001211	1	1	1	1	1	1	1	1	1	1	1	0	1	1	1	1	1	1	1	1	1	1	1	1	1	1	0	1	1	2	1	1	1	1	1	1	1	1	1	1	1	1	1	1	1	1	1	1	1
OG0001212	1	1	1	1	1	1	1	1	1	1	1	0	1	1	1	1	1	3	1	1	1	1	1	1	1	1	0	1	1	1	1	1	1	1	1	1	1	1	1	1	1	1	1	1	1	1	1	1	1
OG0001213	1	3	2	1	0	0	3	2	1	2	2	0	1	2	1	1	1	0	1	1	2	0	0	1	2	3	1	1	1	1	0	1	0	1	0	0	0	1	1	1	1	1	1	1	1	1	0	1	2
OG0001214	1	1	1	1	1	1	1	1	1	1	1	0	1	1	1	1	1	0	1	1	1	0	0	2	1	1	1	1	1	1	2	1	1	1	1	1	1	1	1	1	1	1	1	1	1	1	1	1	1
OG0001215	1	1	1	1	1	1	1	1	1	1	1	1	1	1	1	1	1	1	1	1	1	1	1	1	1	1	1	1	1	1	1	1	1	1	1	1	1	1	1	1	1	1	1	1	1	1	1	1	1
OG0001216	1	1	1	1	1	1	1	1	1	1	1	0	1	1	1	1	1	0	1	1	1	1	1	1	1	1	1	1	1	0	1	1	1	1	2	1	1	1	1	1	1	1	1	1	1	1	1	1	1
OG0001217	1	1	1	1	1	1	0	1	1	1	1	0	1	1	1	1	1	1	1	1	1	1	1	1	1	1	1	1	1	1	1	1	1	1	1	1	1	1	1	1	1	1	1	1	1	1	1	1	1
OG0001218	1	1	1	1	1	1	1	1	1	1	1	0	1	1	1	1	1	0	1	1	1	1	1	1	1	1	1	1	1	1	1	1	1	1	1	1	1	1	1	1	1	1	1	1	1	1	1	1	1
OG0001219	2	1	1	0	0	1	1	0	2	1	2	0	1	0	2	0	2	0	2	2	1	0	0	1	1	1	0	1	1	1	1	1	1	0	1	0	0	2	0	1	1	1	2	1	1	2	0	2	0
OG0001220	1	1	1	2	2	2	0	0	1	2	1	2	1	0	1	1	1	0	1	1	1	1	3	0	1	1	0	1	1	1	1	1	1	1	1	1	1	0	1	1	1	0	1	1	1	1	0	1	1
OG0001221	1	1	1	1	2	1	1	1	1	1	1	0	2	1	2	1	1	2	1	1	1	0	2	1	1	1	1	1	1	2	1	1	1	1	2	0	0	1	1	1	1	1	1	1	1	1	1	1	1
OG0001222	1	1	1	1	1	1	1	1	1	1	1	1	1	1	1	1	1	0	1	1	1	1	1	1	1	1	1	1	1	1	1	1	1	1	1	1	1	1	1	1	1	1	1	1	1	1	1	1	1
OG0001223	1	1	1	1	1	1	1	0	1	1	1	1	1	1	1	1	1	1	1	1	1	0	1	1	1	1	0	1	1	1	1	1	1	1	1	1	1	1	1	1	1	1	1	1	1	1	1	1	1
OG0001224	1	1	1	0	1	1	1	1	1	1	1	1	1	1	1	1	1	0	1	1	1	1	1	1	1	1	1	1	1	1	1	1	1	1	1	1	1	1	1	1	1	1	1	1	1	1	1	1	1
OG0001225	1	1	2	1	1	1	1	1	1	1	1	1	1	1	1	1	1	0	1	1	1	0	1	1	1	1	0	1	1	1	1	1	1	1	1	1	1	1	1	1	1	1	1	1	1	1	1	1	1
OG0001226	0	1	2	2	1	1	1	1	1	1	3	0	0	1	1	0	1	1	2	0	0	1	1	0	0	2	0	1	0	0	1	0	1	1	1	0	0	1	1	1	2	1	1	1	1	1	0	1	0
OG0001227	1	1	0	1	1	1	1	1	1	1	1	0	1	1	1	1	1	0	1	1	1	1	1	1	1	1	1	1	1	1	1	1	1	1	1	1	1	1	1	1	1	1	1	1	1	1	1	1	1
OG0001228	1	1	1	1	1	1	1	1	1	1	1	1	1	1	1	1	1	1	1	1	1	1	0	1	1	1	1	1	1	1	1	1	1	1	1	1	1	1	1	1	1	1	1	1	1	1	1	1	1
OG0001229	1	1	1	1	1	1	1	1	1	1	1	1	1	1	1	1	1	0	1	1	1	1	1	1	1	1	1	1	1	1	1	1	1	1	1	1	1	1	1	1	1	1	1	1	1	1	1	1	1
OG0001230	1	1	1	1	1	1	1	1	1	1	1	1	1	1	1	1	1	1	1	1	1	1	1	1	1	1	2	1	1	1	1	1	1	1	1	1	1	1	1	1	1	1	1	1	1	1	1	1	1
OG0001231	1	1	1	1	1	1	1	1	1	1	1	1	1	1	1	1	1	0	1	1	1	1	0	1	1	1	1	1	1	1	1	2	1	1	1	1	1	1	1	1	1	1	1	1	1	1	1	1	1
OG0001232	1	1	1	1	1	1	1	1	1	1	1	0	1	1	1	1	2	0	1	1	1	1	1	1	1	1	0	1	1	1	1	1	1	1	1	1	1	1	1	1	1	1	1	1	1	1	1	1	1
OG0001233	1	1	1	1	1	1	1	1	1	1	1	1	1	1	1	1	1	0	1	1	1	1	1	1	1	1	1	1	1	1	1	0	1	1	1	1	1	1	1	1	1	1	1	1	1	1	1	1	1
OG0001234	1	1	1	1	1	1	1	1	1	1	1	0	1	1	1	1	1	1	1	1	1	1	1	1	1	1	1	1	1	1	1	1	1	1	1	1	1	1	1	1	1	1	1	1	1	1	1	1	1
OG0001235	1	1	1	1	1	1	1	1	1	1	1	0	1	1	1	1	1	1	1	1	1	0	1	1	1	1	1	1	1	1	1	1	1	1	1	1	1	1	1	1	1	1	1	1	1	1	1	1	1
OG0001236	1	1	1	1	1	1	1	1	1	1	1	1	1	1	1	1	1	0	1	1	1	1	1	1	1	1	1	1	1	1	1	1	1	1	1	1	1	1	1	1	1	1	1	1	1	1	1	1	1
OG0001237	1	1	1	1	2	1	1	1	1	1	1	1	1	1	1	1	1	0	1	1	1	0	1	1	1	1	0	1	1	1	1	1	1	1	0	1	1	1	1	1	1	1	1	1	1	1	1	1	1
OG0001238	1	1	1	1	1	1	1	1	1	1	1	1	1	1	1	1	1	0	1	1	1	0	1	1	1	1	1	1	1	1	1	1	1	1	1	1	1	1	1	1	1	1	1	1	1	1	1	1	1
OG0001239	1	1	1	1	1	1	1	1	1	1	1	0	1	1	1	1	1	0	1	1	1	1	1	1	1	1	0	1	1	1	1	0	1	1	1	1	1	1	1	1	1	1	1	1	1	1	1	1	1
OG0001240	1	1	1	1	1	1	1	1	1	1	1	1	1	1	1	1	1	0	1	1	1	1	1	1	1	1	1	0	1	1	1	1	1	1	1	1	1	1	1	1	1	1	1	1	1	1	1	1	1
OG0001241	1	1	1	0	1	1	1	1	1	1	1	1	1	1	1	1	1	0	1	1	1	0	1	1	1	1	0	1	1	1	1	0	1	1	1	1	1	1	1	1	1	1	1	1	1	1	1	1	1
OG0001242	1	0	1	1	1	1	1	1	1	1	1	1	1	1	1	1	1	0	1	1	1	1	1	0	1	1	0	1	1	1	1	2	1	1	1	2	1	1	1	1	1	1	1	1	1	1	1	1	1
OG0001243	1	1	1	1	1	1	1	1	1	1	1	1	1	1	1	1	1	0	1	1	1	1	1	1	1	1	1	1	1	1	1	1	1	1	1	1	1	1	1	1	1	1	1	1	1	1	1	1	1
OG0001244	1	1	1	1	1	1	1	1	1	1	1	0	1	1	1	1	1	1	1	1	1	1	1	1	0	1	1	1	1	1	1	1	1	1	1	1	1	1	1	1	1	1	1	2	1	1	1	1	1
OG0001245	1	1	1	1	1	1	1	1	1	1	1	0	1	1	1	1	1	1	1	1	1	1	1	1	1	1	1	1	1	1	1	1	1	1	1	1	1	1	1	1	1	1	1	1	1	1	1	1	1
OG0001246	1	1	1	1	1	1	1	1	1	1	1	1	1	1	1	1	1	0	1	1	1	1	1	1	1	1	0	1	1	1	1	1	1	1	0	1	1	1	1	1	1	1	1	1	1	1	1	1	1
OG0001247	1	1	1	1	1	1	1	0	1	1	1	1	0	0	1	0	1	0	1	0	2	0	1	1	0	1	0	1	0	0	0	0	2	1	1	0	0	1	2	1	2	1	1	2	1	1	1	1	3
OG0001248	1	1	1	1	1	1	1	1	1	1	1	1	1	1	1	1	1	2	1	1	1	0	1	1	0	1	1	1	1	1	1	1	1	1	1	1	1	1	1	1	1	1	1	1	1	1	1	1	1
OG0001249	1	1	1	1	1	1	1	1	1	1	1	0	1	1	1	1	1	0	1	1	1	1	1	1	1	1	1	1	1	1	1	1	1	1	1	1	1	1	1	1	1	1	1	1	1	1	1	1	1
OG0001250	2	2	2	2	1	0	2	0	0	3	1	0	1	2	1	2	4	0	2	0	1	0	0	0	0	2	1	3	1	1	0	1	1	1	1	0	0	0	2	0	0	0	1	2	1	5	1	0	0
OG0001251	1	1	1	1	1	1	1	1	1	1	1	0	1	1	1	1	1	0	1	1	1	1	1	1	1	1	1	1	1	0	1	1	1	1	1	1	1	1	1	1	1	1	1	1	1	1	1	1	1
OG0001252	1	1	1	1	1	1	1	1	1	1	1	0	1	1	1	1	1	0	1	1	1	1	1	1	1	1	1	1	1	1	1	1	1	1	1	1	1	1	1	1	1	1	1	1	1	1	1	1	1
OG0001253	1	1	1	0	1	1	1	1	1	1	1	0	1	1	1	1	1	0	1	1	1	1	1	0	1	1	1	1	1	1	1	0	1	1	1	1	1	1	1	1	1	1	1	1	1	1	1	1	1
OG0001254	1	1	1	0	1	1	0	1	1	1	1	1	1	1	1	1	1	1	1	1	1	1	1	1	1	1	1	1	1	1	1	1	1	1	1	1	1	1	1	1	1	1	1	1	1	1	1	1	1
OG0001255	1	1	1	1	1	1	1	1	1	1	1	1	1	1	1	0	1	1	1	1	1	0	1	1	1	1	1	1	1	1	1	1	1	1	1	1	1	1	1	1	1	1	1	1	1	1	1	1	1
OG0001256	1	1	1	1	1	1	1	1	1	1	1	1	1	1	1	1	1	1	1	1	1	1	1	1	1	1	1	1	1	1	1	1	1	1	1	1	1	1	1	1	1	1	1	1	1	1	1	1	1
OG0001257	1	1	1	1	1	1	1	1	1	1	1	0	1	1	1	1	1	1	1	1	1	1	1	1	1	1	1	1	1	1	1	1	1	1	1	1	1	1	1	1	1	1	1	1	1	1	1	1	1
OG0001258	1	1	1	1	1	1	1	1	1	1	1	0	1	1	1	1	1	0	1	1	1	1	1	1	1	1	1	1	1	1	1	1	1	1	1	1	1	1	1	1	1	1	1	1	1	1	1	1	1
OG0001259	1	1	1	1	1	1	1	1	1	1	1	1	1	1	1	1	1	0	1	1	1	0	1	1	1	1	1	1	1	1	2	1	1	1	1	1	1	1	1	1	1	1	1	1	1	1	1	1	1
OG0001260	1	1	1	1	1	1	1	1	1	1	1	1	1	1	1	1	1	0	1	1	1	1	1	1	1	1	1	1	1	1	1	1	1	1	1	1	1	1	1	1	1	1	1	1	1	1	1	1	1
OG0001261	1	1	1	1	1	1	1	1	1	1	1	1	1	1	1	1	1	1	2	1	1	0	1	1	1	1	0	1	1	1	1	1	1	1	1	1	1	1	1	1	1	1	1	1	1	1	1	1	1
OG0001262	1	1	1	1	1	1	0	1	1	1	1	1	1	1	1	1	1	1	1	1	1	1	1	1	0	1	1	1	1	1	1	0	1	1	1	1	1	1	1	1	1	1	1	1	1	1	1	1	1
OG0001263	1	1	1	0	1	1	1	1	1	1	1	0	1	1	1	1	1	1	1	1	1	1	1	1	1	1	0	1	1	1	1	1	1	1	1	1	1	1	1	1	1	1	1	1	1	1	1	1	1
OG0001264	1	1	1	1	1	1	1	1	1	1	1	0	1	1	1	1	1	1	1	1	1	1	1	1	1	1	1	1	1	1	1	1	1	1	1	1	1	1	1	1	1	1	1	1	1	1	1	1	1
OG0001265	1	1	0	1	1	1	0	1	1	1	1	1	1	1	1	1	1	0	1	1	1	1	1	1	1	1	1	1	1	1	1	1	1	1	1	1	1	1	1	1	1	1	1	1	1	1	1	1	1
OG0001266	1	1	1	1	1	1	0	1	1	1	1	1	1	1	1	1	1	1	1	1	1	0	1	1	1	1	1	1	1	1	1	1	1	1	1	1	1	1	1	1	1	1	1	1	1	1	1	1	1
OG0001267	1	1	1	1	1	1	0	1	1	1	1	0	1	1	1	1	1	1	1	1	1	1	1	1	1	1	1	1	1	1	1	1	1	1	1	1	1	1	1	1	1	1	1	1	1	1	1	1	1
OG0001268	3	1	1	0	1	1	1	0	0	1	1	0	2	2	1	3	1	0	1	0	1	0	1	1	5	1	0	1	2	1	1	2	2	0	0	0	0	0	0	1	1	0	4	1	1	1	0	0	4
OG0001269	1	1	1	1	1	1	0	1	1	1	1	1	1	1	1	1	1	1	1	1	1	1	1	1	1	1	1	1	1	1	1	2	1	1	1	1	1	1	1	1	1	1	1	1	1	1	1	1	1
OG0001270	1	1	1	1	1	1	1	1	1	1	1	0	1	1	1	1	1	2	1	1	1	1	2	1	1	1	0	1	1	1	1	1	1	1	1	1	1	1	1	1	1	1	1	1	1	1	1	1	1
OG0001271	1	1	1	1	1	1	1	1	1	1	1	0	1	1	1	1	1	1	1	1	1	0	0	1	1	1	1	1	1	1	1	1	1	1	0	1	1	1	1	1	1	1	1	1	1	1	1	1	1
OG0001272	1	1	1	1	1	1	1	1	1	1	1	0	1	1	1	1	1	1	1	1	1	0	0	1	1	1	0	1	1	1	1	1	1	1	1	1	1	1	1	1	1	1	1	1	1	1	1	1	1
OG0001273	1	1	1	1	1	1	1	1	1	1	1	0	1	1	1	1	1	0	1	1	1	1	1	1	1	1	1	1	1	1	1	1	1	1	1	1	1	1	1	1	1	1	1	1	1	1	1	1	1
OG0001274	1	1	1	1	1	1	1	1	1	1	1	0	1	1	1	1	1	1	1	1	1	1	1	1	1	1	1	1	1	1	1	1	1	1	0	1	1	1	1	1	1	1	1	1	1	1	1	1	1
OG0001275	1	1	1	1	1	1	1	1	1	1	1	0	1	1	1	1	1	1	1	1	1	0	1	0	1	1	1	1	1	1	1	2	1	1	1	1	1	1	1	1	1	1	1	1	1	1	1	1	1
OG0001276	1	1	1	1	1	1	1	1	1	1	1	0	1	1	1	1	1	0	1	1	1	1	0	1	1	1	1	1	1	1	1	2	1	1	1	1	1	1	1	1	1	1	1	1	1	1	1	1	1
OG0001277	1	1	1	1	1	1	1	1	1	1	1	1	1	1	1	1	1	0	1	1	1	1	1	1	1	1	0	1	1	1	1	1	1	1	1	1	1	1	1	1	1	1	1	1	1	1	1	1	1
OG0001278	1	1	1	1	1	1	1	1	1	1	1	0	1	1	1	1	1	0	1	1	1	1	1	0	1	1	1	1	1	1	1	1	1	1	1	1	1	1	2	1	1	1	1	1	1	1	1	1	1
OG0001279	1	1	1	1	1	1	1	1	1	1	1	1	1	1	1	1	1	0	1	1	1	1	1	1	1	1	1	1	1	1	1	0	1	1	1	1	1	1	1	1	1	1	1	1	1	1	1	1	1
OG0001280	1	1	1	1	1	1	1	1	1	1	1	0	1	1	1	1	1	0	1	1	1	0	1	1	1	1	1	1	1	1	1	1	1	1	1	1	1	1	1	1	1	1	1	1	1	1	1	1	1
OG0001281	1	1	1	1	1	1	1	0	1	1	1	1	1	1	1	1	1	0	1	1	1	0	0	1	1	1	1	1	1	1	1	1	1	1	1	1	1	1	1	1	1	1	1	1	1	1	1	1	1
OG0001282	1	1	1	1	1	1	1	1	1	1	1	0	1	1	1	1	1	1	1	1	1	1	1	1	1	1	1	1	1	1	1	0	1	1	1	1	1	1	1	1	1	1	1	1	1	1	1	1	1
OG0001283	1	1	1	1	1	1	1	1	1	1	1	0	1	1	1	1	1	2	2	1	1	1	1	1	1	0	0	1	1	1	1	1	1	1	1	1	1	1	1	1	1	1	1	1	1	1	1	1	1
OG0001284	1	1	1	1	1	1	1	1	1	1	1	0	1	1	1	1	1	0	1	1	1	1	1	1	1	1	1	1	1	1	1	1	1	1	1	1	1	0	1	1	1	0	1	1	1	1	1	1	1
OG0001285	1	1	1	1	2	0	2	0	1	2	0	0	0	0	0	0	6	0	2	0	1	0	2	1	0	1	0	1	0	0	1	0	0	0	1	1	1	0	0	2	2	0	1	1	1	3	0	1	0
OG0001286	1	1	1	1	1	1	1	1	1	1	1	0	1	1	1	1	1	1	1	1	1	1	1	1	1	1	1	1	1	1	1	1	1	1	1	1	1	1	1	1	1	1	1	1	1	1	1	1	1
OG0001287	1	1	0	1	1	1	0	1	1	1	1	0	1	1	1	1	1	1	1	1	1	1	1	1	1	1	1	1	1	1	1	1	1	1	1	1	1	1	1	1	1	1	1	1	1	1	1	1	1
OG0001288	1	1	1	1	1	1	1	1	1	1	1	0	1	1	1	1	1	1	1	1	1	1	1	1	1	1	1	1	0	1	1	1	1	1	1	1	1	1	1	1	1	1	1	1	1	1	1	1	1
OG0001289	1	1	1	1	1	1	1	1	1	1	1	1	1	1	1	1	1	0	1	1	0	1	1	0	1	1	0	1	1	1	1	1	1	1	1	1	1	1	1	1	1	1	1	1	1	1	1	1	1
OG0001290	1	1	1	0	1	1	1	1	1	1	1	1	1	1	1	1	1	0	1	1	1	1	1	0	0	1	1	1	1	1	1	1	1	1	1	1	1	1	1	1	1	1	1	1	1	1	1	1	1
OG0001291	1	1	1	1	1	1	1	1	1	1	1	1	1	1	1	1	1	1	1	1	1	0	0	0	1	1	1	1	1	1	1	1	1	1	1	1	1	1	1	1	1	1	1	1	1	1	1	1	1
OG0001292	1	1	1	0	1	1	1	1	1	1	1	1	1	1	1	1	1	0	1	1	1	0	0	1	1	1	1	1	1	1	1	1	1	1	0	1	1	1	1	1	1	1	1	1	1	1	1	1	1
OG0001293	1	1	1	1	1	1	1	1	1	1	1	0	1	1	1	1	1	1	1	0	1	1	1	1	2	1	1	1	1	1	1	1	1	1	0	0	1	2	2	1	1	2	1	1	1	1	1	1	1
OG0001294	1	1	1	1	1	1	1	1	1	1	1	0	1	1	1	1	2	0	1	1	1	0	1	1	1	1	1	1	1	1	1	1	1	1	1	1	1	1	1	1	1	1	1	1	1	1	1	1	1
OG0001295	1	1	1	1	1	1	0	1	1	1	1	1	1	1	1	1	1	1	1	1	1	1	1	1	1	1	1	1	1	1	1	1	1	1	1	1	1	1	1	1	1	1	1	1	1	1	1	1	1
OG0001296	1	1	0	1	1	1	1	1	1	1	1	0	1	1	1	1	1	1	1	1	1	1	1	0	1	1	1	1	1	1	1	0	1	1	1	1	1	1	1	1	1	1	1	1	1	1	1	1	1
OG0001297	1	1	1	1	1	1	1	1	1	1	1	1	1	1	1	1	1	1	1	1	1	0	1	1	1	1	1	1	1	1	1	1	1	1	1	1	0	1	1	1	1	1	1	1	1	1	1	1	1
OG0001298	1	1	1	1	1	1	1	1	1	1	1	1	1	1	1	1	1	1	1	1	1	1	1	0	1	1	0	1	1	0	1	1	1	1	1	1	1	1	1	1	1	1	1	1	1	1	1	1	1
OG0001299	1	1	0	1	1	1	1	1	1	1	1	0	1	1	1	1	1	1	1	1	1	1	1	1	1	1	1	1	1	0	1	1	1	1	1	1	1	1	1	1	1	1	1	1	1	1	1	1	1
OG0001300	1	1	1	1	1	1	1	0	1	1	1	0	1	1	1	1	1	2	1	1	0	0	1	2	1	1	1	1	1	1	1	1	1	1	0	1	1	1	1	1	1	1	1	1	1	1	1	1	1
OG0001301	1	1	1	1	1	1	1	1	1	1	1	1	1	1	1	1	1	1	1	1	1	1	0	1	1	1	1	1	1	1	1	1	1	1	1	1	1	1	1	1	1	1	1	1	1	1	1	1	1
OG0001302	1	1	1	1	1	1	1	1	1	1	1	1	1	1	1	1	1	2	1	1	1	0	1	1	1	1	1	1	1	1	1	1	1	1	1	0	1	1	1	1	1	1	1	1	1	1	1	1	1
OG0001303	1	1	1	1	1	1	1	1	1	1	1	0	1	1	1	1	1	0	1	1	1	1	1	1	1	1	1	1	1	1	1	1	1	1	1	1	1	1	1	1	1	1	1	1	1	1	1	1	1
OG0001304	1	1	1	1	1	1	1	1	1	1	1	1	1	1	1	1	1	1	1	1	1	1	1	1	1	1	1	1	1	1	1	1	1	1	1	1	1	1	1	1	1	1	1	1	1	1	1	1	1
OG0001305	1	1	1	1	1	1	1	1	1	1	1	0	1	1	1	1	1	2	1	1	1	1	1	1	1	1	1	1	1	1	1	0	1	1	1	1	1	0	1	1	1	0	1	1	1	1	1	1	1
OG0001306	1	1	1	1	1	1	1	1	1	1	1	1	1	1	1	1	1	0	1	1	1	1	1	1	1	0	1	1	1	1	1	1	1	1	1	1	1	1	1	1	1	1	1	1	1	1	1	1	1
OG0001307	1	1	1	0	1	1	1	1	1	1	1	1	1	1	1	1	1	1	1	1	1	1	1	1	1	1	1	1	0	1	1	1	1	1	1	1	1	1	1	1	1	1	1	1	1	1	1	1	1
OG0001308	1	1	1	1	1	1	1	1	1	1	1	0	1	1	1	1	1	1	1	1	1	0	1	1	1	1	0	1	1	0	1	1	1	1	1	1	1	1	1	1	1	1	1	1	1	1	1	1	1
OG0001309	0	4	1	1	1	0	2	1	0	3	0	0	5	0	2	0	0	0	1	0	1	0	1	1	3	4	0	0	4	0	3	1	0	0	0	0	0	0	2	3	0	0	2	2	1	0	1	0	8
OG0001310	0	2	2	0	0	5	1	0	0	0	0	0	0	2	8	2	3	0	6	0	0	0	0	0	3	2	0	5	0	0	0	0	2	0	0	0	0	7	0	0	0	4	0	0	0	0	0	0	6
OG0001311	0	1	2	1	0	1	0	1	1	2	3	0	1	1	1	2	1	0	3	0	2	0	0	0	0	1	0	3	1	1	1	1	0	0	1	1	1	0	2	3	2	0	1	4	2	1	0	1	0
OG0001312	1	1	1	1	1	1	1	1	1	1	1	1	1	1	1	1	1	0	2	1	1	1	1	1	1	1	0	1	1	1	1	1	1	1	1	1	1	1	1	1	1	2	1	1	1	1	1	1	1
OG0001313	1	1	1	0	1	1	1	1	1	1	1	1	0	1	1	1	1	0	1	1	1	1	1	1	1	1	1	1	1	1	1	1	1	1	1	1	1	1	1	1	1	1	1	1	1	1	1	1	1
OG0001314	1	1	1	1	1	1	1	1	1	1	1	0	1	1	1	1	1	1	1	1	1	0	0	0	1	0	1	1	1	1	1	0	1	1	1	1	1	1	1	1	1	1	1	1	1	1	1	1	1
OG0001315	1	1	1	1	1	1	1	1	1	1	1	1	1	1	1	1	1	1	1	1	1	1	1	1	1	1	0	1	1	1	1	1	1	1	1	1	1	1	1	1	1	1	1	1	1	1	1	1	1
OG0001316	1	1	1	1	1	1	1	1	1	1	1	1	1	1	1	1	1	0	1	1	1	1	1	1	1	1	1	1	1	1	1	1	1	1	1	1	1	1	1	1	1	1	1	1	1	1	1	1	1
OG0001317	1	1	1	1	1	1	1	1	1	1	1	0	1	1	1	1	1	0	1	1	1	1	1	1	1	1	1	1	1	1	1	1	1	1	1	1	1	1	1	1	1	1	1	1	1	1	1	1	1
OG0001318	2	1	1	0	2	1	1	0	1	1	1	0	1	1	0	1	2	0	1	1	1	0	2	1	1	2	1	1	1	1	1	1	1	0	0	0	0	0	0	3	1	0	1	1	2	1	0	1	2
OG0001319	1	1	1	1	1	1	1	1	1	1	1	1	1	1	1	1	1	0	1	1	1	0	1	1	1	1	1	1	1	1	1	2	1	1	1	1	1	1	1	1	1	1	1	1	1	1	1	1	1
OG0001320	1	1	1	1	1	1	1	1	1	1	1	0	1	1	1	1	1	0	1	1	1	1	0	1	1	1	1	1	1	1	1	1	1	1	1	1	1	1	1	1	1	1	1	1	1	1	1	1	1
OG0001321	1	1	1	0	1	1	1	1	1	1	1	0	1	1	1	1	1	1	1	1	1	0	1	1	0	1	1	1	1	1	1	1	0	1	1	1	1	1	1	1	1	1	1	1	1	1	1	1	1
OG0001322	1	1	1	0	1	1	0	1	1	1	1	1	1	1	1	1	1	0	1	1	1	0	1	1	1	1	0	1	1	1	1	1	1	1	1	1	1	1	1	1	1	1	1	1	1	1	1	1	1
OG0001323	1	1	1	1	1	1	1	1	1	1	1	0	1	1	1	1	1	0	1	1	1	0	1	1	1	1	1	1	1	1	1	1	1	1	1	1	1	1	1	1	1	1	1	1	1	1	1	1	1
OG0001324	2	1	1	3	2	1	0	1	1	0	2	0	3	2	0	2	6	0	5	1	0	0	1	1	1	1	2	0	3	3	0	3	1	1	0	0	0	3	1	0	0	3	2	0	0	0	1	0	1
OG0001325	1	1	1	1	1	1	1	1	1	1	1	0	1	1	1	1	2	0	1	1	1	0	1	1	1	1	1	1	1	1	1	1	1	1	1	1	1	1	1	1	1	1	1	1	1	1	0	1	1
OG0001326	1	1	1	1	1	1	1	1	1	1	1	1	1	1	1	1	1	1	1	1	0	0	0	1	1	1	1	1	1	1	1	0	1	1	1	1	1	1	1	1	1	1	1	0	1	1	1	1	1
OG0001327	1	1	1	1	1	1	1	1	1	1	1	0	1	1	1	1	1	0	1	1	1	1	1	1	1	1	1	1	1	1	1	1	1	1	2	1	1	1	1	1	1	1	1	1	1	1	1	1	1
OG0001328	1	1	1	1	1	1	1	1	1	1	1	0	1	1	1	1	1	1	1	1	1	0	1	1	1	1	1	1	1	1	1	1	1	2	1	1	1	1	1	1	1	1	1	1	1	1	1	1	1
OG0001329	1	1	1	1	1	1	1	1	1	1	1	0	1	1	1	1	1	1	1	1	1	1	0	1	0	1	1	1	1	1	1	1	1	1	1	1	1	1	1	1	1	1	1	1	1	1	1	1	1
OG0001330	1	1	0	1	1	1	0	0	1	1	1	1	1	1	1	1	1	1	1	1	1	0	1	1	1	1	1	1	1	1	1	1	1	1	1	1	1	1	1	1	1	1	1	1	1	1	1	1	1
OG0001331	1	1	1	1	1	1	0	1	1	1	1	1	1	1	1	1	1	1	1	1	1	1	1	1	1	1	1	1	1	1	1	1	1	1	1	1	1	1	1	1	1	1	1	1	1	1	1	1	1
OG0001332	1	1	1	1	1	1	1	1	1	2	1	0	1	1	1	1	1	1	1	1	1	0	1	1	1	1	1	1	1	1	1	1	1	1	1	1	1	1	1	1	1	1	1	1	1	1	1	1	1
OG0001333	1	1	1	1	1	1	1	1	1	1	1	1	1	1	1	1	1	1	1	1	1	1	1	1	1	0	1	1	1	1	1	1	1	1	1	1	1	0	1	1	1	0	1	1	1	1	1	1	1
OG0001334	1	1	1	1	1	1	1	1	1	1	1	1	1	1	1	1	1	0	1	1	1	1	0	1	1	1	1	1	1	1	1	1	1	1	1	1	1	1	1	1	1	1	1	1	1	1	1	1	1
OG0001335	1	1	1	1	1	1	0	1	1	1	1	1	1	1	1	1	1	1	1	1	0	1	1	1	1	1	1	1	1	0	1	1	1	1	1	1	1	1	1	1	1	1	1	1	1	1	1	1	1
OG0001336	1	1	1	1	1	1	1	1	1	1	1	1	1	1	1	1	1	0	1	1	1	0	1	1	1	1	0	1	1	1	0	1	1	1	1	1	1	1	1	1	1	1	1	1	1	1	1	1	1
OG0001337	1	1	1	1	1	1	0	1	1	1	1	0	1	1	1	1	1	0	1	1	1	0	1	1	1	1	1	1	1	0	1	1	1	1	1	1	1	4	1	1	1	2	1	1	1	1	1	1	1
OG0001338	1	1	1	1	1	1	1	1	1	1	1	0	1	1	1	1	1	0	1	1	1	0	1	1	1	1	1	1	1	1	1	1	1	1	1	1	1	1	1	1	1	1	1	1	1	1	1	1	1
OG0001339	1	1	1	1	1	1	1	1	1	1	1	1	2	2	1	2	1	0	1	1	1	1	0	0	1	1	1	1	2	2	1	0	1	1	1	0	1	1	1	1	1	1	1	1	1	1	1	1	1
OG0001340	1	1	1	1	1	1	1	1	1	1	1	1	1	1	1	1	1	0	1	1	1	1	1	1	1	1	1	1	1	1	1	1	1	1	0	1	1	1	1	1	1	1	1	1	1	1	1	1	1
OG0001341	1	1	1	1	1	1	1	1	1	1	1	0	1	1	1	1	1	0	1	1	1	0	1	1	1	1	1	1	1	1	1	1	1	1	1	1	1	1	1	1	1	1	1	1	1	1	1	1	1
OG0001342	1	1	1	1	1	1	1	1	1	1	1	0	1	1	1	1	0	1	1	1	1	1	1	1	1	1	0	1	1	1	1	1	0	1	1	1	1	1	1	1	1	1	1	1	1	1	1	1	1
OG0001343	1	1	1	1	1	1	0	1	1	1	1	0	1	1	1	1	1	0	1	1	1	0	1	0	1	1	2	1	2	1	1	1	1	1	1	1	1	1	1	1	1	1	1	1	1	1	1	1	2
OG0001344	1	1	1	1	1	1	1	1	1	1	1	0	1	1	1	1	1	1	1	1	1	1	1	0	1	1	1	1	1	1	1	1	1	1	0	1	1	1	1	1	1	1	1	1	1	1	1	1	1
OG0001345	1	1	1	1	1	1	0	1	1	1	1	0	1	1	1	1	1	0	1	1	2	1	1	1	1	1	1	1	1	1	1	1	1	1	1	1	1	1	1	1	1	1	1	1	1	1	1	1	1
OG0001346	1	1	1	1	1	1	1	0	1	1	1	0	1	1	1	1	1	2	1	1	1	2	0	1	1	1	2	1	1	1	1	1	1	1	1	1	1	1	1	1	1	1	1	1	1	1	0	1	1
OG0001347	1	1	1	1	1	1	1	1	1	1	1	1	1	1	1	1	1	1	1	1	1	0	0	1	1	1	1	1	1	1	1	1	1	1	0	1	1	1	1	1	1	1	1	1	1	1	1	1	1
OG0001348	1	1	1	1	1	1	1	0	1	1	1	0	1	1	1	1	1	0	1	1	1	0	3	1	1	1	2	1	1	1	1	1	2	0	1	1	1	0	1	1	1	0	1	1	1	1	1	1	1
OG0001349	1	1	1	0	1	1	0	1	1	1	1	1	1	1	1	1	1	1	1	1	1	1	1	1	1	1	1	1	1	0	1	1	1	1	1	1	1	1	1	1	1	1	1	1	1	1	1	1	1
OG0001350	3	1	1	1	1	0	1	1	3	1	1	1	1	1	2	0	0	0	2	2	1	2	0	0	0	0	1	1	1	1	1	0	0	2	0	0	0	4	3	0	0	4	2	2	0	0	2	3	0
OG0001351	1	1	1	1	1	1	1	1	1	1	1	0	1	1	1	1	1	0	1	1	1	0	1	1	1	1	0	1	1	0	1	1	1	1	1	1	1	1	1	1	1	1	1	1	1	1	1	1	1
OG0001352	1	1	1	0	1	1	1	1	1	0	1	0	1	1	1	1	1	1	1	1	1	1	1	1	1	1	1	1	1	1	1	1	1	1	1	1	1	1	1	1	1	1	1	1	1	1	1	1	1
OG0001353	1	1	1	1	1	1	1	1	1	1	1	1	1	1	1	1	1	0	1	1	1	1	1	1	1	1	1	1	1	1	1	1	1	1	1	1	1	0	1	1	1	0	1	1	1	1	1	1	1
OG0001354	1	1	1	1	1	1	1	1	1	1	1	0	1	1	1	1	1	0	1	1	1	1	1	0	0	1	1	1	1	1	1	1	1	1	0	1	1	1	1	1	1	1	1	1	1	1	1	1	1
OG0001355	1	1	1	1	1	1	1	1	1	1	1	0	1	1	1	1	1	0	1	1	1	1	1	1	1	1	1	1	1	1	1	1	1	1	1	1	1	1	1	1	1	1	1	1	1	1	1	1	1
OG0001356	1	1	1	0	1	1	1	1	1	1	1	0	1	1	1	1	1	0	1	1	1	1	1	1	1	1	1	1	1	1	1	1	0	1	1	1	1	1	1	1	1	1	1	1	1	1	1	1	1
OG0001357	1	1	1	1	1	1	0	1	1	1	1	1	1	1	1	1	1	0	1	1	1	0	1	1	1	1	1	1	1	1	1	1	1	1	1	1	1	1	1	1	1	1	1	1	1	1	1	1	1
OG0001358	1	1	1	1	1	1	1	1	1	1	1	0	1	1	1	2	1	0	1	1	1	0	1	1	1	1	1	1	1	1	1	1	1	1	1	1	1	1	1	1	1	1	1	1	1	1	1	1	1
OG0001359	1	1	0	1	1	1	0	1	1	1	1	1	1	1	1	1	1	0	1	1	1	1	1	1	1	1	1	1	1	0	1	1	1	1	1	1	1	1	1	1	1	1	1	1	1	1	1	1	1
OG0001360	1	1	1	0	1	1	1	1	1	1	1	1	1	1	1	1	1	0	1	1	1	0	0	1	1	1	0	1	1	1	1	1	1	1	1	1	1	1	1	1	1	1	1	1	1	1	1	1	1
OG0001361	1	1	1	1	1	1	1	1	1	1	1	0	1	1	1	1	1	1	1	1	1	1	1	1	1	1	1	1	1	1	1	1	1	1	1	1	1	1	0	1	1	1	1	1	1	1	1	1	1
OG0001362	1	2	1	1	1	1	1	1	1	1	1	1	1	1	1	1	1	0	1	1	1	1	1	0	0	2	0	1	1	1	1	0	1	1	1	1	1	2	1	1	1	2	1	1	1	1	1	1	1
OG0001363	1	1	1	1	1	1	1	1	1	1	1	0	1	1	1	1	1	1	1	1	1	0	0	1	1	1	1	1	1	1	1	1	1	1	1	1	1	1	1	1	1	1	1	1	1	1	1	1	1
OG0001364	1	1	0	0	1	1	0	1	1	1	1	1	1	1	1	1	1	2	1	1	1	1	1	1	1	1	1	1	1	1	1	1	1	1	1	1	1	1	1	1	1	1	1	1	1	1	1	1	1
OG0001365	1	0	1	1	1	1	1	1	1	1	1	1	1	1	1	1	1	1	1	1	1	1	1	1	1	1	1	1	1	1	1	0	1	1	1	1	1	1	1	1	1	1	1	1	1	1	1	1	1
OG0001366	1	1	1	1	1	1	1	1	1	1	1	1	1	1	1	1	1	0	1	1	1	0	1	1	1	1	1	1	1	1	1	1	1	1	1	1	1	1	1	1	1	1	1	1	1	1	1	1	1
OG0001367	1	2	2	0	0	2	2	0	0	2	2	0	1	1	1	1	1	0	2	0	2	0	0	1	1	2	0	2	1	1	0	1	1	0	1	0	0	0	1	2	2	0	1	2	2	1	0	0	1
OG0001368	1	1	1	1	1	1	1	1	1	1	1	1	1	1	1	1	1	0	1	1	1	1	1	1	1	1	1	1	1	1	1	1	1	1	1	1	1	1	1	1	1	1	1	1	1	1	1	1	1
OG0001369	1	1	1	1	1	1	1	1	1	1	1	1	1	1	1	1	1	0	1	1	1	1	0	1	1	1	1	1	1	1	1	1	1	1	1	1	1	1	1	1	1	2	1	1	1	1	1	1	1
OG0001370	1	1	1	0	1	1	1	1	1	1	1	0	1	1	1	1	1	1	1	1	1	1	1	1	1	1	1	1	1	1	1	1	1	1	1	1	1	1	1	1	1	1	1	1	1	1	1	1	1
OG0001371	1	1	1	1	1	1	1	1	1	1	1	0	1	1	1	1	1	1	1	1	0	0	1	1	1	1	1	1	1	1	1	1	1	1	1	1	1	1	1	1	1	1	1	1	1	1	1	1	1
OG0001372	1	1	1	1	1	1	1	1	1	1	1	0	1	1	0	1	1	1	1	1	1	0	1	1	1	1	0	1	1	1	1	1	1	1	1	1	1	1	1	1	1	1	1	1	1	1	1	1	1
OG0001373	1	1	1	0	1	1	0	1	1	1	1	0	1	1	1	1	1	0	1	1	1	1	1	1	1	1	1	1	1	0	1	2	1	1	1	1	1	1	1	1	1	1	1	1	1	1	1	1	1
OG0001374	1	1	1	1	1	1	1	1	1	1	1	0	1	1	1	1	1	1	1	1	1	1	1	1	1	1	0	1	1	0	1	1	1	1	1	1	1	1	1	1	1	1	1	1	1	1	1	1	1
OG0001375	1	1	1	1	1	1	1	1	1	1	1	1	1	1	1	1	1	1	1	1	1	0	1	1	1	1	0	1	1	1	1	1	1	1	1	1	1	1	1	1	1	1	1	1	1	1	1	1	1
OG0001376	1	1	1	1	1	1	0	1	1	1	1	0	1	1	1	1	1	0	1	1	1	0	1	1	1	1	1	1	1	1	1	1	1	1	1	1	1	1	1	1	1	1	1	1	1	1	1	1	1
OG0001377	1	1	1	0	1	1	1	1	1	1	1	2	1	1	1	1	1	0	1	1	1	1	1	0	1	1	1	1	1	1	1	1	1	1	1	1	1	1	1	1	1	1	1	1	1	1	1	1	1
OG0001378	1	1	1	1	2	1	1	0	1	1	1	1	1	1	1	1	1	2	2	1	1	0	1	1	1	1	2	1	1	1	1	1	1	0	1	0	0	1	1	1	1	1	1	1	1	1	1	1	1
OG0001379	1	1	1	1	1	1	1	0	2	2	1	1	1	1	1	0	1	0	1	1	1	0	1	1	1	1	1	1	1	1	2	1	1	0	0	0	0	2	1	1	1	2	2	1	1	2	0	2	1
OG0001380	1	1	1	1	1	1	1	1	1	1	1	1	1	1	0	1	2	0	1	1	0	0	1	1	1	1	3	1	1	1	1	1	1	1	0	1	1	1	1	1	1	1	1	1	1	1	1	1	1
OG0001381	1	1	1	1	2	1	1	1	1	1	1	1	1	1	1	1	2	1	1	1	1	0	2	1	1	1	1	1	1	1	1	0	1	1	3	0	0	1	1	1	1	1	1	1	1	1	1	1	1
OG0001382	1	1	1	1	1	1	0	1	1	1	1	0	1	1	1	1	1	0	1	1	1	1	1	1	1	1	1	1	1	1	1	1	1	1	1	1	1	1	1	1	1	1	1	1	1	1	1	1	1
OG0001383	1	1	1	1	1	1	1	1	1	1	1	1	1	1	0	1	1	1	1	1	2	0	0	1	1	1	1	1	1	2	2	1	1	1	1	1	1	1	1	1	1	1	1	1	1	1	1	1	1
OG0001384	1	1	1	1	1	1	1	1	1	2	1	0	1	1	1	1	1	1	2	1	1	1	1	1	1	1	1	1	1	1	1	1	1	1	1	1	1	1	1	1	1	1	1	1	1	1	1	1	1
OG0001385	1	1	1	1	1	1	1	1	1	1	1	0	1	2	2	1	1	0	1	1	1	1	1	1	1	1	1	1	1	0	1	1	1	1	1	1	1	1	1	1	1	1	1	1	1	1	1	1	1
OG0001386	0	3	3	1	1	2	3	1	0	1	3	1	0	1	0	0	2	0	0	0	2	0	3	0	0	2	0	1	0	0	0	0	0	0	2	0	0	2	1	0	2	2	0	2	1	4	0	0	1
OG0001387	0	1	1	1	2	3	1	1	1	2	1	1	1	2	0	2	4	0	0	1	2	1	2	1	0	1	0	0	0	0	1	1	0	0	2	1	1	1	0	1	1	1	1	1	2	2	1	1	1
OG0001388	0	1	1	0	1	0	1	0	2	1	1	0	0	0	2	0	1	0	2	0	2	1	1	1	2	1	0	0	1	0	0	0	1	2	0	1	1	1	0	1	2	2	2	2	0	4	1	2	2
OG0001389	0	1	1	1	1	1	1	1	1	1	1	0	1	1	1	1	1	0	1	0	1	1	1	1	1	1	0	1	1	1	1	1	2	1	1	1	1	1	1	1	1	1	1	1	1	0	1	1	1
OG0001390	1	1	1	1	1	1	1	0	1	1	1	1	1	1	1	1	0	1	1	1	1	1	1	1	1	1	1	1	1	1	1	0	1	1	1	1	1	1	1	1	1	1	1	1	2	1	1	1	1
OG0001391	1	1	1	0	1	1	1	1	1	1	1	1	1	1	1	1	1	1	1	1	1	1	1	0	1	1	1	1	1	1	1	1	1	1	1	1	1	1	1	1	1	1	1	1	1	1	1	1	1
OG0001392	1	1	1	1	1	1	1	1	1	1	1	0	1	1	1	1	1	0	1	1	1	1	0	1	1	1	1	1	1	1	1	1	1	1	1	1	1	1	1	1	1	1	1	1	1	1	1	1	1
OG0001393	1	1	1	1	1	1	1	1	1	1	1	1	1	1	1	1	1	0	1	1	1	1	1	1	1	1	1	1	1	1	1	1	1	1	1	1	1	1	1	1	1	1	1	1	1	1	1	1	1
OG0001394	1	1	0	1	1	1	0	1	1	1	1	0	1	1	0	1	1	1	1	1	1	0	1	1	1	1	1	1	1	1	1	1	1	1	1	1	1	1	1	1	1	1	1	1	1	1	1	1	1
OG0001395	1	1	1	1	1	1	1	1	1	1	1	1	1	1	1	1	1	1	1	1	1	1	1	1	1	1	1	1	1	1	1	1	1	1	1	1	1	1	1	1	1	1	1	1	1	1	1	1	1
OG0001396	1	1	1	1	1	1	1	1	1	1	1	0	1	1	1	1	1	0	1	1	1	1	1	1	1	1	1	1	1	1	1	0	1	1	1	1	1	1	1	1	1	1	1	1	1	1	1	1	1
OG0001397	1	1	1	1	1	1	1	1	1	1	1	1	1	1	1	1	1	0	1	1	2	0	0	1	1	1	1	1	1	1	1	1	1	1	1	1	1	1	1	1	1	1	1	0	1	1	1	1	1
OG0001398	1	1	1	1	1	1	1	1	1	1	1	0	1	1	1	1	1	1	1	1	1	0	1	1	1	1	1	1	1	1	1	1	1	1	1	0	1	1	1	1	1	1	1	1	1	1	1	1	1
OG0001399	1	1	1	1	1	1	1	1	1	1	1	0	1	1	1	1	1	0	1	1	1	1	1	1	1	1	1	1	1	1	1	1	1	1	1	1	1	1	1	1	1	1	1	1	1	1	1	1	1
OG0001400	1	1	1	1	1	1	0	1	1	1	1	1	1	1	1	1	1	1	1	1	1	1	1	1	1	1	1	1	1	1	1	1	1	1	1	1	1	1	1	1	1	1	1	1	1	1	1	1	1
OG0001401	1	1	1	1	1	1	0	1	1	1	1	1	1	1	1	1	0	1	1	1	1	1	1	1	1	1	1	1	1	1	1	1	1	1	1	1	1	1	1	1	1	1	1	1	1	1	1	1	1
OG0001402	1	1	1	0	1	1	1	1	0	1	1	0	1	1	1	1	1	0	1	1	1	0	1	1	1	1	1	1	1	1	1	2	1	1	1	1	1	1	1	1	1	1	1	1	1	1	1	1	1
OG0001403	1	1	1	0	1	1	1	1	1	1	1	0	1	1	1	1	1	1	1	1	1	1	1	1	1	1	1	1	1	1	1	1	1	1	1	1	1	1	1	1	1	1	1	1	1	1	1	1	1
OG0001404	1	1	1	1	1	1	1	1	1	1	1	1	1	1	1	1	1	0	1	1	1	1	1	1	1	1	1	1	0	1	1	1	1	1	1	1	1	1	1	1	1	1	1	1	1	1	1	1	1
OG0001405	1	1	1	1	1	1	1	1	1	1	1	0	1	1	0	1	0	0	1	0	0	1	1	1	1	1	1	1	1	1	1	1	1	1	0	3	3	0	1	1	1	0	1	0	1	1	1	1	1
OG0001406	1	1	1	1	1	1	1	1	1	1	1	0	1	1	1	1	1	1	1	1	1	0	1	1	1	1	1	2	1	1	1	2	1	1	1	1	1	1	1	1	1	1	1	1	1	1	1	1	1
OG0001407	1	1	1	1	1	1	1	1	1	1	1	0	1	1	1	1	1	0	1	1	1	1	1	1	1	1	1	1	1	1	1	1	1	1	1	1	1	1	1	1	1	1	1	1	1	1	1	1	1
OG0001408	1	1	1	1	1	1	1	1	1	1	1	1	1	1	1	1	1	1	1	1	1	1	1	1	1	1	0	1	1	1	1	1	1	1	1	1	1	1	1	1	1	1	1	1	1	1	1	1	1
OG0001409	1	1	0	1	1	1	0	1	1	1	1	0	1	1	1	1	1	1	1	1	1	1	1	1	1	1	1	1	1	1	1	0	1	1	1	1	1	1	1	1	1	1	1	1	1	1	1	1	1
OG0001410	1	1	1	1	1	1	1	1	1	1	1	1	1	1	1	1	1	2	1	1	1	0	1	1	1	1	0	1	1	1	1	1	1	1	1	1	1	1	1	1	1	1	1	1	1	1	1	1	1
OG0001411	1	1	1	1	1	1	1	1	1	1	1	1	0	1	1	1	1	0	1	1	1	1	1	1	1	1	1	1	1	0	1	1	1	1	1	1	1	1	1	1	1	1	1	1	1	1	1	1	1
OG0001412	1	1	1	1	1	1	1	1	1	1	1	0	1	1	1	1	1	0	1	1	1	0	1	1	1	1	1	1	1	1	1	1	1	1	1	1	1	1	1	1	1	1	1	1	1	1	1	1	1
OG0001413	1	1	1	1	1	1	1	1	1	1	1	0	1	1	1	1	1	0	1	1	1	1	1	1	1	1	1	1	1	1	1	1	1	1	1	1	1	1	1	1	1	1	1	1	1	1	1	1	1
OG0001414	1	1	1	1	1	1	0	1	1	1	1	0	1	1	1	1	1	1	1	1	1	0	1	1	1	1	1	1	1	1	1	0	1	1	1	1	1	1	1	1	1	1	1	1	1	1	1	1	1
OG0001415	1	1	1	0	1	1	0	1	1	1	1	0	1	1	1	1	1	1	1	1	1	0	1	1	1	1	1	1	1	1	1	1	1	1	1	1	1	1	1	1	1	1	1	1	1	1	1	1	1
OG0001416	1	1	1	1	1	1	1	1	1	1	1	0	1	1	1	1	1	0	1	1	1	1	1	1	1	1	1	1	1	1	1	1	1	1	1	1	1	0	1	1	1	0	1	1	1	1	1	1	1
OG0001417	1	1	1	1	1	1	1	1	1	1	1	0	1	1	1	1	1	0	1	1	1	0	1	0	1	1	1	1	1	1	1	1	0	1	1	1	1	1	2	1	1	1	1	1	1	1	1	1	1
OG0001418	1	1	1	1	1	1	1	1	1	1	1	0	1	1	1	1	1	0	1	1	1	0	1	1	1	1	1	1	1	1	1	1	1	1	0	1	1	1	2	1	1	1	1	1	1	1	1	1	1
OG0001419	1	1	1	0	1	1	0	1	1	1	1	0	1	1	1	1	1	0	1	1	1	1	1	1	1	1	2	1	1	1	1	0	1	1	1	1	1	1	1	1	1	1	1	1	1	1	1	1	1
OG0001420	1	1	0	1	1	1	0	1	1	1	1	1	1	1	1	1	0	0	1	1	1	1	1	1	1	1	1	1	1	0	1	1	1	1	1	1	1	1	1	1	1	1	1	1	1	1	1	1	1
OG0001421	1	1	1	1	1	1	1	1	1	1	1	0	1	1	1	1	0	1	1	1	1	1	1	1	1	0	1	1	1	1	1	1	1	1	1	1	1	1	1	1	1	1	1	1	1	1	1	1	1
OG0001422	1	1	1	1	1	1	1	1	1	1	1	1	1	1	1	1	1	1	1	1	1	0	1	1	1	1	1	1	1	1	1	1	1	1	1	1	1	1	0	1	1	1	1	1	1	1	1	1	1
OG0001423	1	1	1	1	1	1	1	1	1	1	1	1	1	1	1	1	1	0	1	1	1	1	1	1	1	1	1	1	1	1	1	1	1	1	1	1	1	1	1	1	1	1	1	1	1	1	1	1	1
OG0001424	1	1	1	1	1	1	1	0	1	1	1	0	1	1	1	1	1	0	1	1	1	1	1	1	1	1	1	1	1	1	1	1	1	1	1	1	1	1	1	1	1	1	1	1	1	1	1	1	1
OG0001425	1	1	1	1	1	1	1	1	1	1	1	0	1	1	1	1	1	1	1	1	1	1	0	1	1	1	1	1	1	0	1	1	1	1	1	0	1	1	1	1	1	1	1	1	1	1	1	1	1
OG0001426	1	1	1	1	1	1	1	1	1	1	1	0	1	1	1	1	1	0	1	1	1	0	1	1	1	1	1	1	1	1	1	2	1	1	1	1	1	1	1	1	1	1	1	1	1	1	1	1	1
OG0001427	1	1	1	0	1	1	0	1	1	1	1	1	1	1	1	1	1	0	1	1	1	1	1	1	1	1	1	1	1	1	1	1	1	1	1	1	1	1	1	1	1	1	1	1	1	1	1	1	1
OG0001428	1	1	1	0	1	1	1	1	1	1	1	1	1	1	1	1	1	0	1	1	1	1	1	1	0	1	0	1	1	1	1	1	1	1	1	1	1	1	1	1	1	1	1	1	1	1	1	1	1
OG0001429	1	1	1	0	1	1	1	1	1	1	1	1	1	1	1	1	1	0	1	1	1	1	1	0	1	1	1	1	1	1	1	1	1	1	1	1	1	1	1	1	1	1	1	1	1	1	1	1	1
OG0001430	1	1	1	1	1	1	1	1	1	1	1	1	1	1	1	1	1	0	1	1	1	0	0	1	1	1	1	1	1	1	1	1	1	1	1	1	2	1	1	1	1	1	1	1	1	1	1	1	1
OG0001431	1	1	1	1	1	1	1	1	1	1	2	0	1	1	1	1	1	1	1	0	1	0	1	0	1	1	1	1	1	0	1	1	1	1	1	1	1	1	1	1	1	1	1	1	1	1	1	1	1
OG0001432	1	1	1	1	1	1	1	1	1	1	1	0	1	1	1	1	1	1	1	1	1	0	1	1	1	1	0	1	1	1	1	1	1	1	1	1	1	1	1	1	1	1	1	1	1	1	1	1	1
OG0001433	1	1	1	1	1	1	1	1	1	1	1	1	0	1	1	1	0	1	1	1	1	1	1	1	1	1	1	1	1	1	1	1	1	1	1	1	1	1	1	1	1	1	1	1	1	1	1	1	1
OG0001434	1	1	1	1	1	1	1	1	1	1	1	0	1	1	1	1	1	2	1	1	1	0	0	0	1	1	0	1	1	0	1	1	1	1	1	1	1	1	1	1	1	1	1	1	1	1	1	1	1
OG0001435	1	1	0	1	1	1	0	1	1	1	1	0	1	1	1	1	1	0	1	1	1	1	1	1	2	1	1	1	1	0	1	1	1	1	1	2	1	1	1	1	1	1	1	1	1	1	1	1	1
OG0001436	1	1	1	1	1	1	1	1	1	1	1	1	1	1	1	1	1	1	1	1	1	0	1	1	1	1	1	1	1	1	1	1	1	1	1	1	1	1	1	1	1	1	1	1	1	1	1	1	1
OG0001437	1	1	1	1	1	1	1	1	1	1	1	0	1	1	1	1	1	0	1	1	1	0	1	1	1	1	1	1	1	1	1	1	1	1	1	1	1	1	1	1	1	1	1	1	1	1	1	1	1
OG0001438	1	1	1	1	1	1	1	1	1	1	1	0	1	1	1	1	1	0	1	1	1	1	0	1	1	1	1	1	1	1	1	1	1	1	1	1	1	1	1	1	1	1	1	1	1	1	1	1	1
OG0001439	1	1	1	1	1	1	1	1	1	1	1	0	1	1	1	1	1	0	1	1	1	0	1	1	1	1	1	1	1	1	1	1	1	1	1	1	1	1	1	1	1	1	1	1	1	1	1	1	1
OG0001440	1	1	1	1	1	1	1	1	1	1	1	0	1	1	1	1	1	0	1	1	1	1	1	1	1	1	0	1	1	1	1	1	1	1	0	1	1	1	1	1	1	1	1	1	1	1	1	1	1
OG0001441	1	1	1	1	1	1	0	1	1	1	1	1	1	1	1	0	1	0	1	1	1	0	1	1	1	1	1	1	1	1	1	1	1	1	1	1	1	1	1	1	1	1	1	1	1	1	1	1	1
OG0001442	1	1	1	0	1	1	1	1	1	1	1	0	1	1	1	1	1	1	1	1	1	1	1	1	1	1	1	1	1	1	1	1	1	1	1	1	1	0	1	1	1	0	1	1	1	1	1	1	1
OG0001443	1	1	1	1	1	1	1	1	1	1	1	0	1	1	1	1	1	0	1	1	1	0	2	0	1	1	0	1	1	2	1	1	1	1	1	0	1	1	1	1	1	0	1	1	1	1	1	1	1
OG0001444	1	1	1	1	1	1	0	1	1	1	1	0	1	1	1	1	1	1	1	1	1	1	1	1	1	1	1	1	1	1	1	1	1	1	1	1	1	1	1	1	1	1	1	1	1	1	1	1	1
OG0001445	1	1	1	1	1	1	1	1	1	1	1	0	1	1	1	1	1	2	1	1	1	0	1	0	1	1	0	1	1	1	1	1	1	1	1	1	1	1	1	1	1	1	1	1	1	1	1	1	1
OG0001446	1	1	1	1	1	1	1	1	1	1	1	1	1	1	1	1	1	0	1	1	1	1	1	1	1	1	1	1	0	1	1	1	1	1	1	1	1	1	1	1	1	1	1	1	1	1	1	1	1
OG0001447	0	1	1	0	1	1	1	1	1	1	1	2	1	1	1	1	1	0	1	1	1	1	1	1	1	1	1	1	1	1	1	1	1	1	1	1	1	1	1	1	1	1	1	1	1	1	1	1	1
OG0001448	1	1	0	1	1	1	0	1	1	1	1	1	1	1	1	1	1	1	1	1	1	0	1	1	1	1	1	1	1	1	0	0	1	1	1	1	0	1	1	1	1	1	1	1	1	1	1	1	1
OG0001449	1	1	1	1	1	1	0	1	1	1	1	1	1	1	1	1	1	0	1	1	1	1	1	1	1	1	1	1	1	1	1	1	1	1	1	1	1	1	1	1	1	1	1	1	1	1	1	1	1
OG0001450	1	1	1	1	1	1	1	1	1	1	1	0	1	1	1	1	1	0	1	1	1	1	1	0	1	1	1	1	1	1	1	0	1	1	1	1	1	1	1	1	1	1	1	1	1	1	1	1	1
OG0001451	1	1	1	1	1	1	1	1	1	1	1	1	1	1	1	1	1	0	1	1	1	1	1	1	1	1	0	1	1	1	1	1	1	1	1	1	1	1	1	1	1	1	1	1	1	1	1	1	1
OG0001452	1	1	1	1	1	1	1	1	1	1	1	1	1	1	1	1	0	1	1	1	1	1	1	1	1	1	1	1	1	1	1	0	1	1	1	1	1	1	1	1	1	1	1	1	1	1	1	1	1
OG0001453	1	1	1	1	1	1	0	1	1	1	1	0	1	1	0	1	1	2	1	1	1	0	1	1	1	1	1	1	1	1	1	1	1	1	1	1	1	1	1	1	1	1	1	1	1	1	1	1	1
OG0001454	1	1	1	1	1	1	1	1	1	1	1	1	1	1	1	0	1	0	1	1	1	1	1	1	1	1	0	1	1	1	1	1	1	1	1	1	1	0	1	1	1	0	1	1	1	1	1	1	1
OG0001455	1	1	1	1	1	1	1	1	1	1	1	0	1	1	1	1	1	0	1	1	1	1	1	1	1	1	1	1	1	1	1	1	1	1	1	0	1	1	1	1	1	1	1	1	1	1	1	1	1
OG0001456	1	1	1	1	1	1	1	1	1	1	1	1	1	1	1	1	1	0	1	1	1	0	1	1	1	1	1	1	1	1	1	1	1	1	1	1	1	1	1	1	1	1	1	1	1	0	1	1	1
OG0001457	1	1	1	0	1	1	1	0	1	1	1	1	1	1	2	1	1	1	1	1	1	0	1	2	2	1	1	2	1	1	0	1	1	0	2	0	0	1	1	1	1	1	1	1	1	1	1	1	0
OG0001458	1	2	2	0	0	2	2	0	0	4	1	2	0	0	0	0	0	0	1	0	3	0	0	0	0	2	0	1	0	0	0	0	0	0	2	0	0	0	2	2	2	0	0	3	2	1	0	0	0
OG0001459	1	1	1	1	1	1	1	1	1	1	1	0	1	1	1	1	1	0	1	1	1	1	1	0	1	1	1	1	1	1	1	0	1	1	1	1	1	1	1	1	1	1	1	1	1	1	1	1	1
OG0001460	1	1	1	1	1	1	1	1	1	1	1	1	1	1	1	1	1	0	1	1	1	1	1	1	1	1	1	1	1	1	1	0	1	1	1	1	1	1	1	1	1	1	1	1	1	1	1	1	1
OG0001461	1	1	1	1	1	1	1	1	1	1	1	1	1	1	1	1	1	0	1	1	1	0	1	1	1	1	0	1	1	1	1	1	1	1	1	1	1	1	1	1	1	1	1	1	1	1	1	1	1
OG0001462	1	1	1	1	1	1	1	1	1	1	1	1	1	1	1	1	1	0	1	1	1	1	1	1	1	1	1	1	1	1	1	1	1	1	1	1	1	2	1	1	1	1	1	1	1	1	1	1	1
OG0001463	1	1	1	1	1	1	0	1	1	1	1	0	1	1	1	1	1	1	1	1	1	0	1	1	1	1	1	1	1	1	1	1	1	1	1	1	1	1	1	1	1	1	1	1	1	1	1	1	1
OG0001464	1	1	1	1	1	1	1	1	1	1	1	1	1	1	1	1	1	0	1	1	1	1	1	1	1	1	1	1	1	1	1	1	1	1	0	1	1	1	1	1	1	1	1	1	1	1	1	1	1
OG0001465	1	1	1	1	1	1	1	1	1	1	1	1	1	1	1	1	1	0	1	1	1	1	1	1	1	1	1	1	1	1	1	0	1	1	1	1	1	1	1	1	1	1	1	1	1	1	1	1	1
OG0001466	1	1	0	1	1	1	1	0	1	1	1	1	1	1	1	0	1	0	1	1	1	1	1	1	1	1	1	1	1	1	1	1	0	1	1	1	1	1	1	1	1	1	1	1	1	1	1	1	1
OG0001467	1	1	1	1	1	1	1	1	1	1	1	0	1	1	1	1	1	1	1	1	1	0	1	1	0	1	0	1	1	1	1	1	1	1	1	1	1	1	1	1	1	1	3	1	1	1	1	1	0
OG0001468	1	1	1	1	1	1	1	1	1	1	1	1	1	1	1	1	1	0	1	1	1	1	0	1	1	1	1	1	1	1	1	1	1	1	0	1	1	1	1	1	1	1	1	1	1	1	1	1	1
OG0001469	1	1	1	1	1	1	1	1	1	1	1	0	1	1	1	1	1	1	1	1	1	1	1	1	1	1	1	1	0	1	1	1	1	1	1	1	1	1	1	1	1	1	1	1	1	1	1	1	1
OG0001470	1	1	1	1	1	1	1	1	1	1	1	0	1	1	1	1	1	0	1	1	1	0	1	1	1	1	1	1	1	0	1	2	1	1	1	1	1	1	1	1	1	1	1	1	1	1	1	1	1
OG0001471	1	1	1	1	1	1	1	1	1	1	1	0	1	1	1	1	1	1	1	1	1	0	1	1	1	1	1	1	1	1	1	1	1	1	1	1	1	1	1	1	1	1	1	1	1	1	1	1	1
OG0001472	1	1	1	0	1	1	1	1	1	1	1	2	1	1	1	1	1	0	1	1	1	0	1	1	1	1	1	1	1	1	1	1	1	1	1	1	1	1	1	1	1	1	1	1	1	1	1	1	1
OG0001473	1	1	1	1	1	1	1	1	1	1	1	0	1	1	1	1	1	0	1	1	1	0	1	1	1	1	2	1	1	1	1	0	1	1	1	1	1	1	1	1	1	1	1	1	1	1	1	1	1
OG0001474	1	1	1	1	1	1	1	1	1	1	1	0	1	1	1	1	1	0	1	1	1	1	1	1	1	1	1	1	1	1	1	1	1	1	1	1	1	1	1	1	1	1	1	1	1	1	1	1	1
OG0001475	1	1	1	0	1	1	1	1	1	1	1	0	1	1	1	1	1	0	1	1	1	1	1	1	1	1	1	1	1	1	1	2	1	1	1	1	1	1	1	1	1	1	1	1	1	1	1	1	1
OG0001476	1	1	0	1	1	1	0	1	1	1	1	1	1	1	1	1	1	0	1	1	1	1	0	1	1	1	1	1	1	1	1	1	1	1	1	1	1	1	1	1	1	1	1	1	1	1	1	1	1
OG0001477	1	1	1	1	1	1	1	1	1	1	1	1	1	1	1	1	1	0	1	1	1	0	0	1	1	1	1	1	1	1	1	1	1	1	0	1	1	1	1	1	1	1	1	1	1	1	1	1	1
OG0001478	1	1	1	1	1	1	1	0	1	1	1	1	1	1	1	1	1	1	1	1	1	1	1	1	1	1	1	1	1	1	1	1	1	1	1	1	1	1	1	1	1	1	1	1	1	1	1	1	1
OG0001479	1	1	1	1	1	1	1	1	1	1	1	1	1	1	1	1	1	0	1	1	1	1	1	1	1	1	1	1	1	1	1	1	1	1	1	1	1	1	1	1	1	1	1	1	1	1	1	1	1
OG0001480	1	1	1	0	1	1	1	1	1	1	1	0	1	1	1	1	1	0	1	0	1	0	1	1	1	1	1	1	1	1	1	1	1	1	1	1	1	1	1	2	1	1	1	1	1	1	1	1	1
OG0001481	1	1	1	0	1	1	0	1	1	1	1	0	1	1	1	0	1	2	1	1	1	0	1	1	1	1	1	1	1	1	1	1	1	1	1	1	1	1	1	1	1	1	1	1	1	1	1	1	1
OG0001482	1	1	1	0	1	1	1	1	1	1	1	0	1	1	1	1	1	0	1	1	1	1	1	1	1	1	1	1	1	1	1	0	1	1	1	1	1	1	1	1	1	1	1	1	1	1	1	1	1
OG0001483	1	1	1	1	1	1	0	1	1	1	1	0	1	1	1	1	1	0	1	1	1	1	1	1	1	1	1	1	1	1	1	1	1	1	1	1	1	1	1	1	1	1	1	1	1	1	1	1	1
OG0001484	1	1	1	1	1	1	1	1	1	1	1	1	1	1	1	1	1	0	1	1	1	1	1	1	1	1	1	1	1	0	1	1	1	1	0	1	1	1	1	1	1	1	1	1	1	1	1	1	1
OG0001485	1	1	1	1	1	1	1	1	1	1	1	0	1	1	1	1	1	0	1	1	1	1	1	1	1	1	1	1	1	1	1	1	1	1	1	1	1	1	1	1	1	1	1	1	1	1	1	1	1
OG0001486	1	1	1	1	1	1	1	1	1	1	1	0	1	1	1	1	1	0	1	1	1	0	1	1	0	1	1	1	1	1	1	1	1	1	1	1	1	1	1	1	1	1	1	1	1	1	1	1	1
OG0001487	1	5	2	1	1	2	4	0	1	3	3	1	1	1	0	0	2	0	1	0	1	0	2	0	0	3	0	0	0	0	0	0	1	0	2	0	0	3	1	1	0	1	0	2	1	1	0	1	0
OG0001488	1	1	1	1	1	1	1	1	1	1	1	0	1	1	1	1	1	1	1	1	0	1	1	1	1	1	1	1	1	1	1	1	1	1	1	2	1	1	1	1	1	1	1	1	1	1	1	1	1
OG0001489	1	1	1	0	1	1	1	1	1	1	1	0	1	1	1	1	1	0	1	1	1	0	0	1	1	1	1	1	0	1	1	1	1	1	1	1	1	1	1	1	1	1	1	1	1	1	1	1	1
OG0001490	1	1	1	1	1	1	1	1	1	1	1	0	1	1	1	1	1	0	1	1	1	1	1	1	1	1	1	1	1	1	1	0	1	1	1	1	1	1	1	1	1	1	1	1	1	1	1	1	1
OG0001491	1	1	1	0	1	1	1	1	1	1	1	1	1	1	1	0	1	0	1	0	1	1	1	1	1	1	0	1	1	1	0	1	2	1	1	1	1	1	1	1	1	1	1	1	1	1	1	1	1
OG0001492	1	1	1	1	1	1	1	1	1	1	1	0	1	1	1	1	1	2	1	1	1	1	1	1	1	1	0	1	1	0	1	0	1	1	1	1	1	1	1	1	1	1	1	1	1	1	1	1	1
OG0001493	1	1	1	1	1	1	1	1	1	2	1	0	1	1	1	1	1	0	1	1	1	1	1	1	2	1	0	1	1	0	1	1	1	1	1	0	0	1	1	1	1	1	1	1	1	1	1	1	2
OG0001494	1	1	0	1	1	1	0	1	1	1	1	1	1	1	1	1	1	0	1	1	1	1	1	1	1	1	1	1	1	1	1	1	1	1	1	1	1	1	1	1	1	1	1	1	1	1	1	1	1
OG0001495	1	1	1	1	1	1	0	1	1	1	1	1	0	1	1	1	1	0	1	1	1	1	1	1	1	1	1	0	1	1	1	1	1	1	1	2	1	1	1	1	1	1	1	1	1	1	1	1	1
OG0001496	1	0	0	1	2	2	0	0	1	1	0	1	1	1	2	1	1	0	0	0	1	1	3	1	2	0	0	2	1	1	0	1	1	1	1	0	0	1	1	1	1	1	1	2	2	1	1	1	1
OG0001497	1	1	1	1	1	1	1	1	1	1	1	0	1	1	0	1	1	0	1	1	1	0	1	1	0	1	1	1	1	1	1	1	1	1	1	1	1	1	1	1	1	1	1	1	1	1	1	1	1
OG0001498	1	1	1	1	1	0	1	1	1	1	1	1	1	1	1	1	1	0	1	1	1	0	1	1	1	1	1	1	1	1	1	1	1	1	1	1	1	1	1	1	1	1	1	1	1	1	1	1	1
OG0001499	1	1	1	1	1	1	1	1	1	1	1	1	1	1	1	1	1	2	1	1	1	1	1	1	1	1	1	1	1	0	1	0	1	1	0	1	1	1	1	1	1	1	1	1	1	1	1	1	1
OG0001500	1	1	0	1	1	1	1	1	1	1	1	1	1	1	1	1	1	0	1	1	1	1	0	1	1	1	1	1	1	1	1	0	1	1	1	1	1	1	1	1	1	2	1	1	1	1	1	1	1
OG0001501	1	1	1	1	1	1	1	1	1	1	1	0	1	1	1	1	1	0	1	1	1	0	1	1	1	2	1	1	1	1	1	1	1	1	1	1	1	1	1	1	1	1	1	1	1	1	1	1	1
OG0001502	1	1	1	0	1	1	1	1	1	1	1	0	1	1	1	1	1	0	1	1	1	1	1	1	0	1	0	1	1	1	1	1	2	1	1	1	1	1	1	1	1	1	1	1	1	1	1	1	1
OG0001503	1	1	1	1	1	1	2	1	0	1	2	1	1	2	1	1	1	0	2	1	1	0	1	1	1	2	0	1	1	1	1	1	1	0	1	1	1	1	1	2	1	1	1	1	2	1	0	1	1
OG0001504	1	1	0	1	0	1	0	1	1	1	1	1	0	0	1	1	1	1	1	1	1	1	1	1	1	1	1	1	1	0	1	1	1	1	1	1	1	1	1	1	1	1	1	1	1	1	1	1	1
OG0001505	1	1	1	1	1	1	0	1	1	1	1	1	1	1	0	1	1	2	1	1	1	0	1	1	1	1	1	1	1	1	1	1	0	1	1	1	1	0	1	1	1	0	1	1	1	1	1	1	1
OG0001506	1	1	0	1	1	1	0	1	1	1	1	0	1	1	1	1	1	1	1	1	1	0	1	1	1	1	0	1	1	1	1	1	1	1	1	1	1	1	1	1	1	1	1	1	1	1	1	1	1
OG0001507	1	1	1	1	1	1	1	1	1	1	1	0	1	1	1	1	1	0	1	1	1	1	1	1	1	1	1	1	1	1	1	1	1	1	1	1	1	1	0	1	1	1	1	1	1	1	1	1	1
OG0001508	1	1	1	1	1	1	1	1	1	1	1	0	1	1	1	1	1	1	1	1	1	0	2	1	1	1	0	1	1	1	2	1	1	1	1	1	1	1	1	1	1	1	1	1	1	1	1	1	1
OG0001509	1	1	1	1	1	1	1	1	1	1	1	1	1	1	1	1	1	0	1	1	1	1	1	1	1	1	1	1	1	1	1	1	1	1	0	1	1	1	1	1	1	1	1	1	1	1	1	1	1
OG0001510	1	1	1	1	1	1	1	1	1	1	1	0	1	1	1	1	1	0	1	0	1	1	1	1	1	1	1	1	1	1	1	1	1	1	1	1	1	1	1	1	1	1	1	1	1	1	1	1	1
OG0001511	0	1	1	1	1	1	1	1	1	1	1	0	1	1	1	1	1	0	1	1	0	1	1	1	1	1	1	1	1	1	1	1	1	1	1	1	1	3	1	1	1	1	1	0	1	1	1	1	1
OG0001512	0	1	1	1	1	1	1	1	1	1	1	0	1	1	1	1	1	1	1	1	1	0	1	1	1	1	1	1	1	1	1	1	1	1	1	1	1	1	1	1	1	1	1	1	1	1	1	1	1
OG0001513	1	1	1	1	1	1	1	1	1	1	1	1	1	1	1	1	1	0	1	1	1	1	1	1	1	1	0	1	1	1	1	1	1	1	1	1	1	1	1	1	1	1	1	1	1	1	1	1	1
OG0001514	1	1	1	2	1	1	1	1	1	1	1	0	1	1	1	1	1	1	1	0	1	0	2	1	1	1	5	1	0	1	0	5	2	1	0	1	1	0	0	1	1	0	1	1	1	1	1	1	1
OG0001515	1	1	1	1	1	1	1	1	1	1	1	0	1	1	1	1	1	1	1	1	1	0	1	1	1	1	1	1	1	1	1	1	1	1	1	0	0	1	1	1	1	1	1	1	1	1	1	1	1
OG0001516	1	1	1	1	1	1	1	1	1	1	1	0	1	1	1	1	1	0	1	1	1	0	1	1	1	1	1	1	1	1	1	1	1	1	0	1	1	1	1	1	1	1	1	1	1	1	1	1	1
OG0001517	1	1	1	1	1	1	1	1	1	1	1	0	1	1	1	0	1	0	1	1	1	0	1	1	1	1	1	1	1	1	1	1	1	1	1	1	1	1	1	1	1	1	1	1	1	1	1	1	1
OG0001518	1	1	1	1	1	1	1	1	1	1	1	1	1	1	1	1	1	0	1	1	1	0	1	1	1	1	1	1	1	1	1	1	1	1	1	1	1	1	1	1	1	1	1	1	1	1	1	1	1
OG0001519	1	0	1	1	1	1	1	0	1	1	1	0	1	1	1	1	1	1	1	1	1	0	1	1	1	1	0	1	1	1	1	0	1	1	1	1	1	1	1	1	1	1	1	1	1	1	1	1	1
OG0001520	1	1	1	1	1	1	1	1	1	1	1	0	1	1	1	1	1	0	1	1	1	1	1	1	1	1	1	1	1	1	1	0	1	1	1	1	1	1	1	1	1	1	1	1	1	1	1	1	1
OG0001521	1	1	1	1	1	1	1	1	1	1	1	0	1	1	1	1	1	0	1	1	1	1	0	1	1	1	1	1	1	1	1	1	1	1	0	1	1	1	1	1	1	1	1	1	1	1	1	1	1
OG0001522	2	1	1	1	1	1	1	0	1	1	1	0	1	2	1	1	2	0	1	1	1	0	1	1	1	1	1	1	1	1	1	1	3	0	3	0	0	0	0	1	1	0	1	1	1	1	0	1	1
OG0001523	1	1	0	0	0	2	0	0	0	2	0	1	0	0	1	0	2	0	0	0	3	0	0	0	0	1	0	2	0	0	0	0	0	0	1	0	0	3	1	3	1	1	0	3	1	3	1	0	0
OG0001524	1	1	1	1	1	1	1	1	1	1	1	1	1	1	1	1	1	0	1	1	1	1	1	1	1	1	0	1	1	1	1	1	1	1	0	1	1	1	1	1	1	1	1	1	1	1	1	1	1
OG0001525	1	1	1	1	1	1	1	1	1	1	1	0	1	1	1	1	1	0	1	1	1	1	1	1	1	1	0	1	1	1	1	1	1	1	0	1	1	1	1	1	1	1	1	1	1	1	1	1	1
OG0001526	1	2	3	1	1	1	2	0	1	1	1	0	1	1	0	1	1	0	3	0	0	0	1	1	1	2	0	1	1	1	3	1	3	0	0	0	0	1	1	2	1	1	1	1	1	1	0	1	2
OG0001527	1	1	1	1	1	1	1	1	1	1	1	0	1	1	1	1	1	0	1	1	1	1	1	0	1	1	0	1	1	1	1	1	1	1	1	1	1	1	1	1	1	1	1	1	1	1	1	1	1
OG0001528	1	1	1	1	1	1	0	1	1	1	1	1	1	1	1	1	1	0	1	1	1	1	1	1	1	1	1	1	1	1	1	1	1	1	1	1	1	2	1	1	1	2	1	1	1	1	1	1	1
OG0001529	1	1	1	0	1	1	1	1	1	1	1	1	1	1	1	1	1	1	1	1	1	1	1	1	1	1	1	1	1	1	1	1	1	1	1	1	1	1	1	1	1	1	1	1	1	1	1	1	1
OG0001530	1	1	1	0	1	1	1	1	1	1	1	0	1	1	1	1	1	0	1	1	1	1	1	1	1	1	1	1	1	1	1	1	1	1	1	1	1	1	1	1	1	1	1	1	1	1	1	1	1
OG0001531	1	1	1	1	1	1	0	1	1	1	1	1	1	1	1	1	1	1	1	1	1	1	1	1	1	1	1	1	1	1	1	1	1	1	0	1	1	0	1	0	1	0	1	1	1	1	1	1	1
OG0001532	1	1	1	0	1	1	1	1	1	1	1	2	1	1	1	1	1	0	1	1	1	1	1	0	1	1	0	1	1	1	1	1	1	1	0	1	1	1	1	1	1	1	1	1	1	1	1	1	1
OG0001533	1	1	1	0	1	1	0	1	1	1	1	0	1	1	1	1	1	1	1	1	1	1	1	1	1	1	1	1	1	1	1	1	1	1	1	1	1	1	1	1	1	1	1	1	1	1	1	1	1
OG0001534	1	1	1	1	1	1	1	1	1	1	1	1	1	1	1	0	1	0	1	1	1	1	1	1	1	1	1	1	1	1	1	1	1	1	1	1	1	1	1	1	1	1	1	1	1	1	1	1	1
OG0001535	1	1	1	0	1	1	0	1	1	1	1	0	1	1	1	0	1	1	1	1	1	1	1	1	1	1	1	1	1	1	1	1	1	1	1	1	1	1	1	1	1	1	1	1	1	1	1	1	1
OG0001536	1	1	1	1	1	1	1	1	1	1	1	0	1	1	1	1	1	0	1	1	1	1	1	0	1	1	1	1	1	1	1	1	1	1	1	1	1	1	1	1	1	1	1	1	1	1	1	1	1
OG0001537	1	1	1	0	1	1	0	1	1	1	1	1	1	1	1	1	1	0	1	1	1	1	1	1	1	1	1	1	1	1	1	1	1	1	1	1	1	1	1	1	1	1	1	1	1	1	1	1	1
OG0001538	1	1	0	1	1	1	0	1	1	1	1	1	1	1	0	1	2	0	1	1	1	0	1	0	1	1	1	1	1	1	1	1	1	1	1	1	1	1	1	1	1	1	1	1	1	1	1	1	1
OG0001539	1	2	1	1	1	1	1	0	1	1	2	0	1	1	1	1	3	0	1	1	1	0	1	1	1	2	1	1	1	1	1	0	1	1	0	0	0	2	1	1	1	2	1	1	1	1	1	1	1
OG0001540	1	1	1	1	1	1	1	1	1	1	1	0	1	1	1	1	1	0	1	1	1	0	2	1	1	1	1	1	1	0	1	1	1	1	1	1	1	1	1	1	1	1	1	1	1	1	1	1	1
OG0001541	1	1	1	0	1	1	1	1	1	1	1	0	1	1	1	1	1	0	1	1	1	0	1	0	1	1	1	1	1	1	1	1	1	1	1	1	1	1	1	1	1	1	1	1	1	1	1	1	1
OG0001542	1	1	1	1	1	1	1	1	1	1	1	0	1	1	1	1	1	1	1	1	1	0	1	1	1	1	1	1	1	1	1	0	1	1	1	1	1	1	1	1	1	1	1	1	1	1	1	1	1
OG0001543	1	1	1	1	1	1	1	0	1	1	1	0	1	1	1	1	1	2	1	1	1	1	1	1	1	1	0	1	1	1	1	1	1	1	1	1	1	1	1	1	1	1	1	1	1	1	1	1	1
OG0001544	1	1	1	1	1	1	1	1	1	1	1	1	1	1	1	1	1	0	1	1	1	1	0	1	1	1	0	1	1	0	1	0	1	1	1	1	1	1	1	1	1	1	1	1	1	1	1	1	1
OG0001545	1	1	1	1	1	1	1	1	1	1	1	0	1	1	1	1	1	0	1	1	1	0	1	1	1	0	1	1	1	1	1	1	1	1	2	1	1	1	1	1	1	1	1	1	1	1	1	1	1
OG0001546	1	1	1	1	1	1	1	0	1	1	1	1	0	1	1	1	1	1	1	1	1	1	1	1	1	1	1	1	0	0	1	0	1	1	1	1	1	1	1	1	1	1	1	1	1	1	1	1	1
OG0001547	1	1	1	1	1	1	1	1	1	1	1	0	1	1	1	1	1	0	1	1	1	1	1	1	1	1	1	1	1	1	1	1	1	1	0	1	1	1	1	1	1	1	1	1	1	1	1	1	1
OG0001548	1	1	1	1	1	1	1	1	1	1	1	1	1	1	1	0	1	1	1	1	1	0	0	1	1	1	1	1	1	1	1	1	1	1	1	1	1	1	1	1	1	1	1	1	1	1	1	1	1
OG0001549	1	1	1	1	1	1	1	1	1	1	1	0	0	1	0	0	1	0	1	1	1	1	1	2	3	1	1	1	1	1	1	0	1	1	0	0	0	0	1	1	1	1	0	1	1	2	1	1	2
OG0001550	1	1	1	0	1	1	1	1	1	1	1	1	1	1	2	0	1	0	1	1	1	1	0	1	1	1	1	1	1	1	1	1	1	1	1	1	1	1	1	1	1	1	1	1	1	1	1	1	1
OG0001551	1	1	1	1	1	1	1	1	1	1	1	1	1	1	1	1	1	0	1	1	1	1	1	1	1	1	0	1	1	0	1	0	1	1	0	1	1	1	1	1	1	1	1	1	1	1	1	1	1
OG0001552	1	0	1	1	1	1	0	1	1	1	1	0	0	1	1	0	1	1	1	1	1	1	1	1	1	1	1	1	1	1	1	0	1	1	1	1	1	1	1	1	1	1	1	1	1	1	1	1	1
OG0001553	1	1	1	1	1	1	1	1	1	1	1	1	1	1	1	1	1	0	1	1	1	0	1	0	1	1	0	1	1	1	1	1	1	1	1	1	1	1	1	1	1	1	1	1	1	1	1	1	1
OG0001554	1	1	1	1	1	1	1	1	2	1	1	0	1	1	0	1	1	0	2	1	1	0	1	1	1	1	0	1	1	1	1	1	2	1	0	1	1	1	1	1	1	1	1	1	1	1	1	2	1
OG0001555	1	1	1	1	1	1	0	1	1	1	1	1	2	3	1	2	2	2	3	0	1	0	1	0	1	1	0	0	2	0	0	2	1	0	1	1	1	1	1	1	1	1	0	1	1	1	0	1	0
OG0001556	1	1	1	1	1	1	1	1	1	1	1	1	1	1	0	1	1	0	1	1	1	0	1	1	1	1	1	1	1	1	1	1	1	1	1	1	1	1	1	1	1	1	1	1	1	1	1	1	1
OG0001557	1	1	1	1	1	1	0	1	1	1	1	1	1	1	1	1	1	1	1	1	1	0	0	1	1	1	1	1	1	1	1	1	1	1	1	0	0	1	1	1	1	1	1	1	1	1	1	1	1
OG0001558	1	1	1	1	1	1	1	1	1	1	1	0	1	1	1	1	1	1	1	1	1	1	1	1	1	1	1	1	1	0	1	1	1	1	1	1	1	1	1	1	1	1	1	1	1	1	1	1	2
OG0001559	1	1	1	1	1	1	0	1	1	1	1	0	1	1	1	1	1	1	1	1	1	1	1	1	1	1	0	1	1	1	1	0	1	1	1	1	1	1	1	1	1	1	1	1	1	1	1	1	1
OG0001560	1	1	1	1	1	1	1	1	1	1	1	0	1	1	1	1	1	0	1	1	1	0	1	1	1	1	1	1	1	1	1	1	1	1	1	1	1	1	1	1	1	1	1	1	1	1	1	1	1
OG0001561	1	1	1	1	1	1	1	0	1	1	1	1	1	1	1	1	1	1	1	1	1	0	1	1	1	0	1	1	1	0	0	0	1	1	1	1	1	1	1	1	1	1	1	1	1	1	1	1	1
OG0001562	0	3	2	0	1	1	3	1	0	1	2	0	1	5	0	4	0	0	7	2	0	0	1	2	3	3	1	1	1	2	0	2	0	0	0	2	1	1	2	0	0	1	0	0	0	0	0	0	4
OG0001563	5	0	0	2	0	6	0	1	0	1	0	1	0	1	0	0	1	0	3	0	1	0	0	1	2	0	0	2	0	0	0	0	1	0	1	0	0	2	2	2	1	2	4	1	1	5	0	0	0
OG0001564	1	1	1	1	1	1	1	1	1	1	1	0	1	1	1	1	1	0	1	1	1	0	1	1	1	1	0	1	1	1	1	1	1	1	1	1	1	1	1	1	1	1	1	1	1	1	1	1	1
OG0001565	1	1	1	0	1	1	1	1	1	1	1	1	1	1	1	1	1	0	1	1	1	1	0	1	1	1	0	1	1	1	1	1	1	1	1	1	1	1	1	1	1	1	1	1	1	1	1	1	1
OG0001566	1	1	1	1	1	1	0	1	1	1	1	0	1	1	1	1	1	0	1	1	1	1	1	0	1	1	1	1	1	0	1	1	1	1	1	1	1	0	1	1	1	0	1	1	1	1	1	1	1
OG0001567	1	1	1	1	1	1	1	1	1	1	1	0	1	1	1	1	1	0	1	1	1	1	1	1	1	1	1	1	1	1	1	1	1	1	1	1	1	2	1	1	1	0	1	1	1	1	1	1	1
OG0001568	1	1	1	1	1	1	1	1	1	1	1	0	1	1	1	1	1	0	1	1	1	1	1	1	1	1	1	1	1	1	1	1	1	1	0	1	1	1	1	1	1	1	1	1	1	1	1	1	1
OG0001569	1	1	1	1	1	1	1	1	1	1	1	1	1	1	1	1	1	0	1	1	1	1	1	1	1	1	1	1	1	0	1	0	1	1	0	1	1	1	1	1	1	1	1	1	1	1	1	1	1
OG0001570	1	0	1	1	1	1	0	1	1	1	1	1	1	1	1	1	1	0	1	1	1	0	1	1	1	1	1	1	1	1	1	1	1	1	1	1	1	1	0	1	1	1	1	1	1	1	1	1	1
OG0001571	1	1	1	0	1	1	1	1	1	1	1	0	0	1	1	1	1	1	1	1	1	0	1	1	1	1	1	1	1	0	1	0	1	1	1	1	1	1	1	1	1	1	1	1	1	1	1	1	1
OG0001572	2	1	1	1	1	1	1	0	1	1	1	1	0	1	1	1	1	1	1	1	1	1	1	1	1	1	1	1	1	0	1	1	1	1	1	1	1	1	1	0	1	1	1	1	1	1	1	1	1
OG0001573	1	1	1	1	1	1	0	1	1	1	1	0	1	1	1	1	1	0	1	1	1	0	1	1	1	1	1	1	1	1	1	1	1	1	1	1	1	1	1	1	1	1	1	1	1	1	1	1	1
OG0001574	1	1	1	0	1	1	1	1	1	1	1	1	1	1	1	0	1	0	1	1	1	0	1	1	1	1	1	1	1	1	1	1	1	1	1	0	0	1	1	1	1	1	1	1	1	1	1	1	1
OG0001575	1	1	1	1	1	1	1	0	1	1	1	0	1	1	0	1	1	0	1	1	1	1	1	1	1	1	1	1	1	1	1	1	1	1	1	1	1	1	1	1	1	1	1	1	1	1	1	1	1
OG0001576	1	1	1	1	1	1	1	1	1	1	1	0	1	1	1	1	1	0	1	1	1	0	1	2	1	1	0	1	1	1	1	1	1	1	1	1	1	1	1	1	1	1	1	1	1	1	1	1	1
OG0001577	1	1	1	1	1	1	1	1	1	1	1	0	1	1	0	1	1	0	1	1	1	1	1	1	1	1	1	1	1	1	1	1	1	1	0	1	1	1	1	1	1	1	1	1	1	1	1	1	1
OG0001578	1	1	1	1	1	1	0	1	1	1	1	0	1	1	1	1	1	0	1	1	1	1	0	1	1	1	1	1	1	1	1	1	1	1	1	1	1	1	1	1	1	1	1	1	1	1	1	1	1
OG0001579	1	1	1	1	1	1	1	1	1	1	1	0	1	1	1	1	1	0	1	1	1	0	1	0	1	1	1	1	1	0	1	1	1	1	1	1	1	1	1	1	1	1	1	1	1	1	1	1	1
OG0001580	1	1	1	1	1	1	0	1	1	1	1	1	1	1	1	1	1	0	1	1	1	1	1	0	1	1	1	1	1	0	1	1	1	1	1	1	1	1	1	1	1	1	1	1	1	1	1	1	1
OG0001581	1	1	0	0	1	1	0	1	1	1	1	1	1	1	1	1	1	1	1	1	1	0	1	1	1	1	1	1	1	0	1	1	1	1	1	1	1	1	1	1	1	1	1	1	1	1	1	1	1
OG0001582	1	1	1	1	1	1	1	2	1	1	1	1	1	1	1	1	1	0	1	1	2	0	1	1	1	0	1	1	1	2	2	1	1	0	1	0	0	1	2	1	1	1	1	1	1	1	0	1	1
OG0001583	1	1	1	1	1	1	0	1	1	1	1	1	1	1	1	1	1	0	1	1	1	0	1	1	1	1	1	1	1	1	1	2	1	1	1	1	1	1	1	1	1	1	1	1	1	1	1	1	1
OG0001584	1	1	1	0	1	1	1	1	1	1	1	0	1	1	1	1	2	0	1	1	1	1	1	0	1	1	1	1	1	1	1	1	1	1	1	1	1	1	1	1	1	1	1	1	1	1	1	1	1
OG0001585	1	1	1	1	1	1	1	1	1	1	1	0	1	1	1	1	1	0	1	1	1	0	1	1	1	1	0	1	1	1	1	1	1	1	1	1	1	1	1	1	1	1	1	1	1	1	1	1	1
OG0001586	1	1	1	1	1	1	1	1	1	1	1	0	1	1	1	1	1	1	1	1	1	1	1	1	1	1	1	1	1	1	1	0	1	1	1	1	1	1	1	1	1	1	1	1	1	1	1	1	0
OG0001587	2	1	1	1	1	1	1	1	1	1	1	0	1	1	1	1	1	0	1	1	1	1	1	0	1	1	2	1	1	2	1	1	1	2	0	0	0	1	2	1	1	1	2	1	1	1	1	1	1
OG0001588	1	1	1	1	1	1	1	1	1	1	1	0	1	1	1	1	1	0	1	1	1	1	1	0	1	1	1	1	1	1	1	1	1	1	0	1	1	1	1	1	1	1	1	1	1	1	0	1	1
OG0001589	1	1	0	0	1	1	0	1	1	1	1	0	1	1	1	1	1	0	1	1	1	1	1	0	1	1	1	1	1	1	1	1	1	1	1	1	1	1	1	1	1	1	1	1	1	1	1	1	1
OG0001590	2	1	1	0	2	0	1	0	2	0	2	0	4	3	0	3	0	0	1	1	0	1	1	3	1	1	2	0	3	4	1	2	3	1	0	0	0	3	2	0	0	3	2	0	0	0	1	2	1
OG0001591	1	1	1	1	1	1	1	1	1	1	1	0	1	1	1	1	1	1	1	1	1	0	1	1	1	0	1	1	1	1	0	1	1	1	1	1	1	1	1	1	1	1	1	1	1	1	1	1	1
OG0001592	1	1	1	1	1	1	1	1	1	1	1	0	1	1	2	1	1	0	1	1	0	1	0	1	0	1	0	1	2	1	1	1	1	1	1	1	0	1	1	1	1	1	1	0	1	1	1	1	1
OG0001593	1	1	1	1	1	1	1	1	1	1	1	0	1	1	1	1	1	0	0	1	1	0	1	0	1	1	1	1	1	1	1	0	1	1	1	1	1	1	1	1	1	1	1	1	1	1	1	1	1
OG0001594	1	1	1	1	1	1	1	1	1	1	1	1	1	1	1	1	1	0	1	1	1	1	1	1	1	1	1	1	1	1	1	0	1	1	1	1	1	1	1	1	1	1	1	1	1	1	1	1	1
OG0001595	1	1	1	1	1	1	1	1	1	1	1	1	1	1	1	1	1	0	1	1	1	0	1	0	1	1	2	1	1	1	1	0	1	1	1	1	1	1	1	1	1	1	1	1	1	1	1	1	1
OG0001596	1	1	1	0	1	1	0	1	1	1	1	1	1	1	1	1	1	1	1	1	1	1	1	1	1	1	1	1	1	0	1	1	1	1	1	1	1	1	1	1	1	1	1	1	1	1	1	1	1
OG0001597	1	1	1	1	1	1	1	1	1	1	1	0	1	1	1	1	1	0	1	1	1	1	1	1	1	1	1	1	1	1	1	1	1	1	1	1	1	1	1	1	1	1	1	1	1	1	1	1	1
OG0001598	1	1	1	1	1	1	1	1	1	1	1	1	1	1	1	1	1	0	1	1	1	1	0	1	1	1	1	1	1	1	1	1	0	1	0	1	1	1	1	1	1	1	1	1	1	1	1	1	1
OG0001599	1	1	0	1	1	1	0	1	1	1	1	0	1	1	1	1	1	0	1	1	1	0	1	1	1	1	1	1	1	1	1	1	1	1	1	1	1	1	1	1	1	1	1	1	1	1	1	1	1
OG0001600	1	0	1	1	1	1	1	1	1	1	1	0	1	1	1	1	1	1	1	1	2	0	1	1	1	1	1	1	1	0	1	1	1	1	1	1	1	1	1	1	1	1	1	1	1	1	1	1	1
OG0001601	1	1	1	1	1	1	1	1	1	1	1	0	1	1	1	1	1	0	1	1	1	1	1	1	1	1	1	1	1	1	1	1	1	1	1	1	1	1	1	1	1	1	1	1	1	1	1	1	1
OG0001602	1	1	1	1	1	1	1	1	1	1	1	1	1	1	1	1	1	0	1	1	1	1	1	1	1	1	1	1	1	0	1	1	1	1	0	1	1	1	1	1	1	1	1	1	1	1	1	1	1
OG0001603	1	1	1	1	1	1	1	0	1	1	1	0	1	1	1	1	1	0	1	1	1	1	1	1	1	1	1	1	1	1	1	1	1	1	0	1	1	2	1	1	1	1	1	1	1	1	1	1	1
OG0001604	1	1	1	1	1	1	1	1	1	1	1	0	1	1	1	1	1	0	1	1	1	0	1	0	1	1	1	1	1	1	1	0	1	1	1	1	1	1	1	1	1	1	1	1	1	1	1	1	1
OG0001605	1	1	1	1	1	1	1	1	1	1	1	0	1	1	1	1	0	1	2	1	1	1	2	1	1	1	0	1	1	1	1	0	1	1	1	1	1	0	1	1	1	0	1	1	1	1	1	1	1
OG0001606	1	1	1	1	1	1	1	1	1	1	1	0	1	1	1	1	1	1	1	1	1	0	0	1	1	1	1	1	1	1	0	1	0	1	1	1	1	1	1	1	1	1	0	1	1	1	1	1	1
OG0001607	1	1	1	1	1	1	1	0	1	2	1	0	1	1	1	1	1	0	1	1	1	0	1	0	1	1	0	1	1	1	1	1	1	1	1	1	1	1	1	1	1	1	1	1	1	1	1	1	1
OG0001608	0	1	1	0	1	1	0	1	1	1	1	1	1	1	1	1	1	0	1	1	1	1	1	1	1	1	1	1	1	1	1	1	1	1	2	1	1	1	1	1	1	1	1	1	1	1	1	1	1
OG0001609	1	1	1	1	1	1	1	1	1	1	1	1	0	1	1	1	1	0	1	1	1	1	0	1	1	1	1	1	1	1	1	1	1	1	1	1	1	1	1	1	1	1	1	1	1	1	1	1	1
OG0001610	1	1	1	0	1	1	1	1	1	1	1	0	1	1	1	1	1	0	1	1	1	0	0	1	1	1	1	1	1	1	1	1	1	1	1	1	1	1	1	1	1	1	1	1	1	1	1	0	1
OG0001611	1	1	1	1	1	1	1	1	1	1	1	1	0	1	1	1	1	1	1	1	1	1	1	1	1	1	1	1	1	1	1	0	1	1	1	1	1	1	1	1	1	1	1	1	1	1	1	1	1
OG0001612	1	1	1	1	1	1	0	1	1	1	1	0	1	1	1	1	1	0	1	1	1	1	1	0	1	1	0	1	1	1	1	0	1	1	1	1	1	1	1	1	1	1	1	1	1	1	1	1	1
OG0001613	1	1	1	1	1	1	1	0	1	1	1	1	1	1	1	1	1	0	1	1	1	0	1	1	1	1	1	1	1	1	1	1	1	1	1	1	1	1	1	1	1	1	1	1	1	1	1	1	0
OG0001614	2	1	1	1	0	2	1	0	1	2	1	0	1	1	2	1	2	0	2	0	1	0	0	0	2	1	1	2	1	1	2	1	0	0	2	0	0	2	4	2	0	3	1	2	2	2	0	1	2
OG0001615	1	1	1	1	1	1	0	1	1	1	1	1	1	1	1	1	1	0	1	1	1	0	1	1	1	1	1	1	1	1	1	1	1	1	0	1	1	1	1	1	1	1	1	1	1	1	1	1	1
OG0001616	1	1	1	1	1	1	1	1	1	1	1	0	1	1	1	1	1	0	1	1	1	0	1	1	1	1	1	1	1	0	0	1	1	1	1	1	1	1	1	1	1	1	1	1	1	1	1	1	1
OG0001617	3	0	0	1	1	3	0	0	1	1	0	1	0	0	1	0	3	0	1	0	1	0	1	0	2	0	0	4	0	0	1	0	1	1	0	0	0	1	1	2	1	1	2	1	1	2	1	1	5
OG0001618	1	1	1	0	1	1	1	1	1	1	1	0	1	1	1	1	1	0	1	1	1	1	1	1	1	1	1	1	1	1	1	1	1	1	1	1	1	1	1	1	1	1	1	1	1	1	1	1	1
OG0001619	1	1	1	1	1	1	1	1	1	1	1	1	1	1	1	1	1	0	1	1	1	1	1	1	1	1	1	1	0	1	1	1	1	1	1	1	1	1	1	1	1	1	1	1	1	1	1	1	1
OG0001620	1	1	0	1	1	1	1	1	1	1	1	1	1	1	1	1	1	0	1	1	1	1	1	1	1	1	1	1	1	1	1	1	0	1	0	1	1	1	1	1	1	1	1	1	1	1	1	1	1
OG0001621	1	1	1	1	1	1	1	1	1	1	1	1	1	1	0	1	1	0	1	1	1	0	1	0	1	1	0	1	1	0	1	1	1	1	1	1	1	1	1	1	1	1	1	1	1	1	1	1	1
OG0001622	1	1	1	1	1	1	1	1	1	1	1	1	1	1	1	1	1	1	1	1	1	0	1	1	1	1	0	1	1	1	1	1	1	1	1	0	1	1	1	1	1	1	1	1	1	1	1	1	1
OG0001623	1	1	1	1	1	1	1	0	1	1	2	0	1	1	1	1	1	0	1	1	1	1	1	1	1	1	1	1	1	1	1	1	1	1	0	1	1	0	1	1	1	0	2	1	1	1	1	1	1
OG0001624	1	1	1	0	1	1	1	1	1	1	1	0	1	1	1	1	1	1	1	1	1	0	1	1	1	1	1	1	1	1	1	1	1	1	1	1	1	1	1	1	1	1	1	1	1	1	1	1	1
OG0001625	1	1	1	1	1	1	0	1	1	1	1	0	1	1	2	1	1	0	1	1	1	0	0	0	1	1	1	1	1	1	1	1	1	1	1	1	1	0	1	1	1	0	1	1	1	1	1	1	1
OG0001626	1	1	1	2	0	0	0	1	1	2	0	0	1	2	1	2	2	1	4	0	2	0	0	1	0	0	1	2	1	1	0	1	0	0	1	0	0	5	2	4	0	3	1	3	2	3	0	1	0
OG0001627	1	1	0	0	1	1	1	1	1	1	1	1	1	1	1	1	1	0	1	1	1	1	1	1	1	1	1	1	1	1	1	0	1	1	0	1	1	1	1	1	1	1	1	1	1	1	1	1	1
OG0001628	1	1	1	1	1	1	0	1	1	1	1	1	1	1	1	1	2	0	1	0	1	0	1	1	1	1	0	1	1	1	1	1	1	1	0	1	1	1	1	1	1	1	1	1	1	1	1	1	1
OG0001629	1	2	2	1	1	1	2	1	1	1	1	1	1	1	1	1	1	0	1	1	1	0	1	1	1	2	0	1	1	1	1	0	1	1	0	1	1	1	1	1	1	1	1	1	1	1	1	1	1
OG0001630	1	1	0	1	1	1	0	1	1	1	1	0	1	1	1	1	1	0	1	1	1	1	1	1	1	1	1	1	1	0	0	1	1	1	0	1	1	1	1	1	1	1	1	1	1	1	1	1	1
OG0001631	1	1	1	1	1	1	1	1	1	1	1	1	1	1	1	1	1	0	1	1	1	1	1	1	1	1	1	1	1	1	1	1	1	1	1	0	0	0	1	1	1	0	1	1	1	1	1	1	1
OG0001632	1	1	1	1	1	1	1	1	1	1	1	0	1	1	2	1	0	0	1	1	1	1	2	1	1	1	1	1	1	1	1	1	1	1	1	1	1	1	1	1	1	1	1	1	1	1	1	1	1
OG0001633	1	3	3	1	3	0	3	0	0	1	4	1	1	1	2	1	0	0	3	0	1	0	3	0	1	3	0	1	1	1	2	1	1	0	1	0	0	1	2	1	0	1	1	1	1	0	0	0	1
OG0001634	1	1	1	0	1	1	0	1	1	1	1	1	1	1	1	1	1	0	1	1	1	1	1	1	1	1	1	1	1	1	1	1	1	1	0	1	1	1	1	1	1	1	1	1	1	1	1	1	1
OG0001635	1	1	1	1	1	1	1	0	1	1	1	0	1	1	1	1	1	0	1	1	1	1	1	1	1	1	1	1	1	1	1	1	1	1	1	1	1	1	1	1	1	1	1	1	1	1	1	1	1
OG0001636	1	1	1	0	1	1	1	1	1	1	1	0	1	1	1	1	1	0	1	1	1	0	0	1	1	1	0	1	1	1	1	1	1	1	1	1	1	1	1	1	1	1	1	1	1	1	1	1	1
OG0001637	1	1	0	1	1	1	1	0	1	1	1	1	0	1	1	0	1	0	1	1	1	0	1	1	1	1	1	1	1	1	1	1	1	1	1	1	1	1	1	1	1	1	1	1	1	1	1	1	1
OG0001638	1	1	1	1	1	1	1	1	1	1	1	0	1	1	1	1	1	1	1	1	1	1	1	1	1	1	1	1	1	0	1	1	1	1	1	1	1	1	1	1	1	1	1	1	1	1	1	1	1
OG0001639	1	1	1	1	1	1	0	1	1	1	1	1	1	1	1	1	0	0	1	1	1	1	1	1	0	1	0	1	1	1	1	1	1	1	1	1	1	1	1	1	1	1	1	1	1	1	1	1	1
OG0001640	1	1	1	1	1	1	1	1	1	1	1	1	1	1	1	1	1	0	1	1	1	0	1	1	1	1	1	1	1	0	1	1	1	0	1	1	1	1	1	1	1	1	1	1	1	1	1	1	1
OG0001641	1	1	1	1	1	1	0	1	1	1	1	1	1	1	1	1	1	2	1	1	1	1	1	1	1	1	0	1	1	0	0	1	1	1	1	1	1	1	1	1	1	1	1	1	1	1	1	0	1
OG0001642	0	4	1	3	0	1	3	0	0	1	1	1	0	0	1	0	2	0	0	0	1	0	0	1	1	3	0	1	0	0	0	0	0	0	0	0	0	3	0	2	1	1	0	1	3	2	0	0	1
OG0001643	0	1	2	0	0	4	2	1	0	0	1	3	0	0	1	0	1	0	1	0	2	0	0	1	0	1	0	1	0	0	1	0	1	1	0	1	0	0	1	0	1	0	1	4	0	2	1	0	1
OG0001644	0	0	0	0	0	2	0	0	0	2	0	2	1	1	1	1	1	0	0	1	0	0	0	0	0	0	1	1	0	1	1	1	0	0	18	1	1	1	0	2	2	0	2	0	2	1	0	0	0
OG0001645	0	0	0	0	0	2	0	1	0	0	0	3	3	2	1	3	1	5	1	0	1	0	0	2	2	1	3	0	3	3	0	4	0	0	1	0	0	1	0	0	3	0	1	1	0	1	1	0	1
OG0001646	0	0	0	0	0	0	1	0	0	1	1	0	0	0	2	6	0	0	4	0	0	0	0	0	0	0	1	33	0	0	0	1	1	0	0	0	0	1	3	1	0	8	0	2	1	0	0	0	4
OG0001647	1	1	1	1	1	1	1	1	2	1	1	0	1	1	1	1	1	1	1	1	1	0	1	1	1	1	1	1	1	1	1	1	1	1	0	0	0	1	1	1	1	1	1	1	1	1	1	2	1
OG0001648	1	1	1	0	1	1	1	1	1	1	1	2	1	1	1	1	1	0	1	1	1	0	1	1	1	1	1	1	1	1	1	1	1	0	1	1	1	1	1	1	1	1	1	1	1	1	1	1	1
OG0001649	1	1	1	0	1	1	1	1	1	1	1	0	1	1	1	0	1	0	1	0	1	1	1	1	1	1	0	1	1	1	0	1	1	1	1	1	1	1	1	1	1	1	1	1	1	1	1	1	1
OG0001650	1	1	1	1	1	1	1	0	1	1	1	0	1	1	1	1	1	1	1	1	1	0	0	0	1	1	1	1	1	1	1	1	1	1	0	1	1	1	1	1	1	1	1	1	1	1	1	1	1
OG0001651	1	1	1	1	1	1	1	1	1	1	1	0	1	1	1	1	1	0	1	0	1	0	0	2	1	1	1	1	1	1	1	1	1	1	1	0	1	1	1	1	1	1	1	1	1	1	1	1	1
OG0001652	1	1	1	1	1	1	1	1	1	1	1	0	1	1	1	1	1	1	1	1	0	0	0	2	1	1	1	1	1	1	1	1	1	1	0	1	1	1	1	1	1	1	1	0	1	1	1	1	1
OG0001653	1	1	1	1	1	1	1	1	1	1	1	1	0	0	1	0	1	0	1	1	1	1	0	0	1	1	0	1	0	0	1	0	1	1	1	1	1	1	1	1	1	1	1	1	1	1	1	1	1
OG0001654	1	1	1	1	1	1	1	1	1	1	1	0	1	1	0	0	1	0	1	1	1	1	0	1	1	1	1	1	1	1	1	0	1	1	2	1	1	1	1	1	1	1	1	1	1	1	1	1	1
OG0001655	1	1	1	1	1	1	1	1	1	1	1	1	1	1	1	1	1	1	3	1	1	0	1	1	1	1	2	1	1	1	1	1	0	0	0	1	1	2	1	1	1	1	1	1	1	1	0	1	1
OG0001656	1	1	1	1	1	1	1	1	1	1	1	1	1	1	1	0	1	0	1	0	1	0	1	1	1	1	0	1	1	1	0	1	1	1	1	1	1	1	1	1	1	1	1	1	1	1	1	1	1
OG0001657	1	1	1	0	1	1	1	1	1	1	1	0	1	1	1	1	1	1	1	1	1	1	1	1	1	1	1	1	1	1	1	0	1	1	1	1	1	1	1	1	1	1	1	1	1	1	1	1	1
OG0001658	1	1	1	1	1	1	1	1	1	1	1	0	1	1	1	1	1	0	1	1	1	1	1	1	1	1	1	1	1	1	1	1	1	1	0	1	1	1	1	1	1	1	1	1	1	1	1	1	1
OG0001659	1	1	1	1	1	1	1	1	1	1	1	1	1	1	1	0	1	0	1	0	1	0	1	1	1	1	0	1	1	1	0	1	1	1	1	1	1	1	1	1	1	1	1	1	1	1	1	1	1
OG0001660	1	1	1	0	1	1	1	1	1	1	1	2	1	1	1	1	1	1	1	1	1	1	0	1	1	0	1	1	1	1	1	1	1	1	1	1	1	1	1	1	1	1	1	1	1	1	1	1	1
OG0001661	1	1	1	0	1	1	1	0	1	1	1	0	1	1	1	1	1	0	1	1	1	1	0	1	1	1	1	1	1	1	1	1	1	1	0	1	1	2	1	1	1	2	1	1	1	1	0	0	0
OG0001662	1	1	1	1	1	1	1	1	1	1	1	0	1	1	1	1	1	0	1	1	1	0	1	1	1	1	1	1	1	1	1	1	1	1	1	0	1	0	1	1	1	0	1	1	1	1	1	1	1
OG0001663	1	1	1	1	1	1	1	1	1	1	1	1	1	1	1	1	1	0	1	0	1	0	1	2	1	1	0	1	1	1	0	1	1	1	0	1	1	1	2	1	1	1	1	1	1	1	1	1	1
OG0001664	1	1	1	1	0	1	1	1	1	1	1	0	1	1	1	1	1	0	1	1	1	1	1	1	1	1	1	1	1	0	1	0	1	1	1	1	1	1	1	1	1	1	1	1	1	1	1	1	1
OG0001665	1	1	1	1	1	1	1	1	1	1	1	1	0	1	1	1	1	0	1	1	1	0	1	0	1	1	1	1	0	0	1	0	1	1	0	1	1	1	1	1	1	1	1	1	1	1	1	1	1
OG0001666	1	1	1	1	1	1	1	1	1	1	1	2	1	1	1	1	1	0	1	1	1	1	1	1	1	1	0	1	1	1	1	0	1	1	1	1	1	0	1	1	1	0	1	1	1	1	1	1	1
OG0001667	1	1	1	1	1	1	1	1	1	1	1	0	1	1	1	1	1	0	1	1	1	1	0	1	1	1	1	1	1	0	1	0	1	1	1	1	1	1	1	1	1	1	1	1	1	1	1	1	1
OG0001668	1	1	1	0	1	1	0	1	1	1	1	0	1	1	1	1	1	0	1	1	1	0	1	1	1	1	1	1	1	1	1	1	1	1	1	1	1	1	1	1	1	1	1	1	1	1	1	1	1
OG0001669	1	1	1	1	1	1	1	1	1	1	1	1	1	1	1	1	1	0	1	1	1	0	0	1	1	1	1	1	1	1	1	1	1	1	0	1	1	1	1	1	1	1	1	1	1	1	1	1	1
OG0001670	1	1	1	0	1	1	1	1	1	1	1	0	1	1	1	1	1	0	1	1	1	1	1	1	1	1	1	1	1	1	1	1	1	1	0	1	1	1	1	1	1	1	1	1	1	1	1	1	1
OG0001671	1	1	0	1	1	1	0	1	1	1	1	0	1	1	1	1	1	1	1	1	0	1	1	1	1	1	1	1	1	1	1	1	1	1	1	1	1	1	1	1	1	1	1	0	1	1	1	1	1
OG0001672	1	1	1	1	1	1	1	1	1	1	1	0	0	1	0	1	1	1	1	1	1	0	1	1	1	1	1	1	1	2	1	1	1	1	1	1	1	1	1	1	1	1	1	1	1	1	1	1	1
OG0001673	1	1	1	1	1	1	0	1	1	1	1	1	1	1	1	0	1	0	1	1	1	1	1	1	1	1	1	1	1	1	1	1	1	1	1	1	1	1	1	1	1	1	1	1	1	1	1	1	1
OG0001674	1	1	1	1	1	1	0	0	1	1	1	0	1	1	1	1	1	0	1	1	1	1	0	1	1	1	0	1	1	1	1	1	1	1	1	1	1	1	1	1	1	1	1	1	1	1	1	1	1
OG0001675	1	1	1	1	1	1	1	1	1	1	1	1	1	1	1	1	1	0	1	1	1	1	1	1	1	1	1	1	1	1	0	1	1	1	0	1	1	1	1	1	1	1	1	1	1	0	1	1	1
OG0001676	1	1	1	1	1	1	1	1	1	1	1	0	1	1	1	1	1	0	1	1	1	1	1	0	1	1	0	1	1	1	1	0	1	1	0	1	1	1	1	1	1	1	1	1	1	1	1	1	1
OG0001677	1	2	1	0	0	1	1	0	0	1	1	0	2	1	1	2	2	0	1	1	1	0	0	0	2	2	0	1	2	1	2	2	3	0	0	0	0	2	1	1	1	2	1	1	1	2	0	0	2
OG0001678	0	1	0	0	0	2	0	0	0	3	0	1	0	0	0	0	2	0	0	0	4	0	0	0	0	0	0	4	0	0	0	0	1	0	1	0	0	7	1	3	1	4	0	3	1	3	0	0	0
OG0001679	1	1	1	2	1	1	1	1	1	1	1	0	1	1	1	1	1	0	1	0	1	1	1	0	1	1	3	1	1	0	0	4	1	1	1	1	1	0	0	1	1	0	1	1	1	1	1	1	1
OG0001680	1	1	1	1	1	1	1	1	1	1	1	0	1	1	1	1	1	1	1	1	1	1	1	1	1	1	1	1	1	1	1	1	1	1	1	0	0	1	1	1	1	2	1	1	1	1	1	1	1
OG0001681	1	1	1	0	1	1	0	1	1	1	1	0	1	1	1	1	1	0	1	1	1	1	1	0	1	1	1	1	1	1	1	1	1	1	1	1	1	1	1	1	1	1	1	1	1	1	1	1	1
OG0001682	1	1	0	0	1	1	0	1	1	1	1	0	0	1	1	1	1	0	1	1	1	0	1	1	1	1	0	1	1	1	1	1	1	1	1	1	1	1	1	1	1	1	1	1	1	1	1	1	1
OG0001683	1	1	1	0	1	1	1	1	1	1	1	1	1	1	1	1	1	1	1	1	0	0	2	1	1	1	1	1	1	0	2	1	1	1	1	0	0	1	1	1	1	1	1	1	1	1	1	1	1
OG0001684	1	1	1	0	1	1	1	1	1	1	1	0	1	1	1	1	1	0	1	1	1	1	0	1	1	1	1	1	1	1	1	1	1	1	1	0	0	1	1	1	1	1	1	1	1	1	1	1	1
OG0001685	1	1	0	1	1	1	0	1	1	1	1	1	1	1	1	1	1	0	0	1	1	1	1	1	1	1	1	1	1	1	1	1	1	1	1	1	1	1	1	1	1	1	1	1	1	1	1	1	1
OG0001686	1	1	1	1	1	1	1	1	1	1	1	0	1	1	1	1	1	0	1	1	1	1	0	1	1	1	0	1	0	1	1	1	1	1	0	1	1	1	1	1	1	1	1	1	1	1	1	1	1
OG0001687	1	1	1	0	1	1	1	1	1	1	1	0	1	1	1	1	2	0	1	1	1	0	1	1	1	1	2	1	1	1	1	1	0	1	1	0	0	1	1	1	1	1	1	1	1	1	1	1	1
OG0001688	1	1	1	1	1	1	1	1	1	1	1	1	1	1	1	1	1	0	1	1	1	0	1	0	1	1	1	1	1	1	1	1	1	1	1	1	1	1	1	1	1	1	1	1	1	1	1	1	1
OG0001689	1	1	1	1	1	1	1	1	1	1	1	0	1	1	1	1	1	0	1	0	1	1	1	1	1	1	1	1	1	1	1	1	1	1	0	1	1	2	1	1	1	2	1	1	1	1	1	1	1
OG0001690	1	1	1	1	1	1	1	1	1	1	1	0	1	1	1	0	1	0	1	0	1	0	1	1	1	1	0	1	1	1	0	1	1	1	1	1	1	1	1	1	1	1	1	1	1	1	1	1	1
OG0001691	1	1	1	1	1	1	1	1	1	1	1	0	0	1	1	0	1	1	1	1	1	1	0	1	1	1	0	1	0	0	1	0	1	1	1	1	1	1	1	1	1	1	1	1	1	1	1	1	1
OG0001692	1	1	1	1	1	1	1	1	1	1	1	1	1	1	1	0	1	0	1	0	1	1	1	1	1	0	0	1	1	1	0	1	1	1	1	1	1	1	1	1	1	1	1	1	1	1	1	1	2
OG0001693	1	1	1	1	1	1	1	1	1	1	1	0	0	0	1	0	1	3	1	1	2	0	1	1	0	1	0	1	0	0	1	0	1	1	1	1	1	1	1	1	1	1	1	1	1	1	1	1	1
OG0001694	2	1	1	1	1	0	0	1	1	1	1	1	1	1	2	1	1	0	2	0	1	0	1	1	1	1	1	1	1	1	1	1	1	0	1	1	1	1	2	1	1	1	2	1	1	1	0	1	1
OG0001695	1	1	1	0	1	1	1	1	1	1	1	1	1	1	1	1	1	1	1	1	1	0	1	1	1	1	1	1	1	1	1	1	0	1	1	1	1	1	1	1	1	1	1	1	1	1	1	1	1
OG0001696	1	2	1	0	1	1	2	1	1	1	1	0	0	0	1	0	1	0	1	1	1	1	1	0	1	2	1	1	0	0	1	0	1	1	0	1	1	1	1	1	1	1	1	1	1	1	1	1	1
OG0001697	1	1	1	1	1	1	1	1	1	1	1	1	1	1	0	0	1	0	1	1	1	0	1	1	1	1	1	1	1	1	1	1	1	1	1	1	1	1	1	1	1	1	1	1	1	1	1	1	1
OG0001698	1	1	1	1	1	1	1	1	1	1	1	1	1	1	1	1	1	0	1	1	1	1	1	1	1	1	1	1	1	1	1	1	1	1	1	1	0	0	1	1	1	0	1	1	1	1	1	1	1
OG0001699	1	1	0	0	0	2	0	0	0	1	0	0	1	1	1	1	3	0	2	0	1	0	1	1	1	1	0	0	1	1	1	1	1	0	1	1	1	2	1	3	1	2	1	3	1	1	0	0	1
OG0001700	1	1	1	1	1	1	1	1	1	1	1	1	1	1	1	1	1	1	1	1	1	1	1	1	1	1	0	1	1	0	2	1	0	1	1	0	0	1	1	1	1	1	1	1	1	1	1	1	1
OG0001701	1	1	1	1	1	1	0	1	1	1	1	0	1	1	1	1	1	0	1	1	1	1	1	1	1	1	1	1	1	1	1	1	1	1	1	1	1	0	1	1	1	0	1	1	1	1	1	1	1
OG0001702	1	1	1	2	1	1	1	1	1	1	1	0	1	1	1	1	1	2	1	1	0	1	2	1	1	1	1	1	1	1	1	1	2	1	0	1	1	1	1	1	1	1	1	0	1	1	1	1	1
OG0001703	1	1	1	0	1	1	1	1	1	1	1	0	1	1	1	1	1	0	1	1	1	1	1	1	1	1	1	1	1	0	1	1	1	1	1	1	1	1	1	1	1	1	1	1	1	1	1	1	1
OG0001704	1	1	1	1	1	1	1	0	1	1	1	0	1	1	1	1	1	0	1	1	1	1	2	1	1	1	1	1	1	1	1	1	1	1	1	1	1	1	0	0	1	3	1	1	0	2	0	1	1
OG0001705	1	1	1	1	1	1	1	1	1	1	1	0	1	1	1	1	1	0	1	1	1	0	1	1	1	1	0	1	1	1	1	1	1	1	1	1	1	1	1	1	1	1	1	1	1	1	1	1	1
OG0001706	0	0	0	0	0	1	0	1	0	4	0	0	0	0	1	0	3	0	1	1	1	0	1	1	0	0	2	4	0	0	1	0	1	0	0	0	0	5	1	3	0	6	0	1	4	2	0	0	1
OG0001707	1	1	1	1	1	1	1	1	1	1	1	0	1	1	1	1	1	0	1	1	1	0	1	1	0	1	0	1	1	1	1	1	1	1	0	1	1	1	1	1	1	1	1	1	1	1	1	1	1
OG0001708	1	1	1	1	1	1	1	1	1	1	1	1	1	1	2	1	1	0	2	1	1	1	1	1	1	1	1	1	1	1	1	1	1	1	0	0	0	1	1	1	1	1	1	1	1	1	1	1	1
OG0001709	1	2	2	0	0	1	2	0	0	0	1	0	2	1	1	1	3	0	4	0	1	0	0	0	3	3	0	0	3	2	2	3	1	0	0	0	0	5	0	0	0	1	3	0	0	3	0	0	4
OG0001710	1	1	1	0	1	1	1	1	1	1	1	0	0	1	1	1	1	0	1	1	1	1	1	1	1	1	1	1	1	0	1	0	1	1	1	1	1	1	1	1	1	1	1	1	1	1	1	1	1
OG0001711	1	1	1	1	1	1	1	1	1	1	1	0	0	1	1	1	1	0	1	1	1	1	1	1	1	1	0	1	1	1	1	0	1	1	1	1	1	1	1	1	1	1	1	1	1	1	1	1	1
OG0001712	1	1	1	0	1	1	1	0	1	1	1	0	1	1	1	1	1	0	1	0	1	0	1	1	1	0	1	1	1	1	1	1	2	1	0	1	1	1	1	1	1	1	1	1	1	1	1	1	1
OG0001713	1	1	1	0	1	1	1	1	1	1	1	0	1	1	1	1	1	0	1	0	1	1	1	1	1	1	0	1	1	1	1	1	1	1	2	1	1	1	1	1	2	1	1	1	1	1	1	1	1
OG0001714	1	1	1	1	1	1	1	1	1	1	1	0	1	1	1	1	1	0	1	1	1	0	1	0	1	1	1	1	1	1	1	1	1	1	0	1	1	1	1	1	1	1	1	1	1	1	1	1	1
OG0001715	1	1	1	1	1	1	1	1	1	1	1	0	1	1	1	1	1	0	1	0	1	0	1	1	1	1	1	1	1	1	1	1	1	1	1	1	1	1	1	1	1	1	1	1	1	1	0	1	1
OG0001716	2	1	1	0	2	1	2	0	0	1	2	1	1	1	2	1	1	0	2	1	1	0	1	2	2	1	1	1	1	1	1	1	1	0	1	0	0	0	0	1	1	0	2	1	1	1	0	0	2
OG0001717	1	1	1	1	1	1	1	1	1	1	1	1	1	1	1	1	1	0	1	1	1	0	1	1	1	1	1	1	1	1	1	0	1	1	1	1	1	1	1	1	1	1	1	1	1	1	1	1	1
OG0001718	1	1	1	1	1	1	1	1	1	1	1	0	1	1	1	1	1	0	1	1	1	1	1	1	1	1	1	1	1	1	1	1	1	1	1	2	1	1	1	1	1	1	1	1	1	1	1	1	1
OG0001719	1	1	1	0	1	1	1	0	1	1	1	1	0	0	1	1	1	1	1	1	1	1	1	0	0	1	0	1	0	0	1	0	1	1	1	1	1	1	1	1	1	1	1	1	1	1	1	1	0
OG0001720	1	1	1	1	1	1	1	1	1	1	1	0	1	1	1	1	1	0	1	1	1	0	1	1	1	1	1	1	1	0	1	0	1	1	0	0	0	1	1	1	1	1	1	1	1	1	1	1	1
OG0001721	2	0	0	0	0	2	1	0	1	1	2	1	1	1	3	0	2	0	0	0	1	0	0	0	3	1	0	1	1	1	0	1	1	0	0	0	0	2	0	2	0	2	4	0	2	2	0	3	2
OG0001722	1	1	1	0	1	1	0	0	2	1	1	1	0	1	1	1	1	1	1	1	2	0	1	1	1	1	1	1	0	0	1	0	1	0	1	1	1	0	0	1	1	0	1	2	1	1	0	2	1
OG0001723	1	1	1	1	1	1	1	1	1	1	1	0	1	1	1	1	1	0	1	1	1	1	0	1	1	1	1	1	1	1	1	2	1	1	1	0	0	1	1	1	1	1	1	1	1	1	1	1	1
OG0001724	2	2	2	1	1	1	2	0	1	2	2	0	1	1	1	1	1	0	2	1	1	0	1	1	0	1	1	1	1	1	1	1	1	1	0	0	0	1	1	1	1	1	1	1	1	1	1	1	1
OG0001725	1	1	1	0	1	1	1	1	1	1	1	1	1	1	1	1	1	0	1	1	1	0	1	1	1	1	1	1	1	1	0	1	1	1	0	1	1	1	1	1	1	1	1	1	1	1	1	1	1
OG0001726	1	1	1	1	1	1	1	1	1	1	1	0	1	1	1	1	1	1	1	0	1	1	1	1	1	1	1	1	1	1	1	0	1	1	1	1	1	1	1	1	1	1	1	1	1	1	1	0	1
OG0001727	1	2	5	0	2	0	6	0	0	2	0	1	0	1	1	2	4	4	2	0	1	0	3	1	1	4	1	0	0	0	1	0	0	0	0	0	0	1	2	1	1	2	0	1	0	3	0	0	1
OG0001728	1	0	1	0	0	1	0	0	0	2	0	0	1	2	2	1	1	0	1	0	0	0	0	0	0	0	0	1	2	1	0	0	1	0	0	0	0	2	1	1	0	2	0	1	0	2	1	0	2
OG0001729	1	1	1	1	1	1	1	2	1	1	1	1	1	1	1	1	1	0	1	1	1	0	1	1	1	1	1	1	1	0	1	1	1	1	1	0	1	1	1	1	1	1	1	1	1	1	1	1	1
OG0001730	1	1	1	1	1	1	1	1	0	1	1	0	1	1	1	1	1	0	1	0	1	1	1	1	1	1	1	1	1	1	0	1	1	1	1	1	1	1	1	1	1	1	1	1	1	1	1	0	1
OG0001731	1	1	1	1	1	1	1	1	1	1	1	2	1	1	1	1	1	1	1	1	1	1	1	1	1	1	1	1	1	1	1	1	0	1	0	0	0	1	1	1	1	1	1	1	1	1	1	1	1
OG0001732	1	1	1	1	1	1	0	1	1	1	1	1	1	1	1	1	0	0	1	1	1	1	1	1	0	1	0	1	1	1	1	1	1	1	0	1	1	1	1	1	1	1	1	1	1	1	1	1	1
OG0001733	1	1	1	1	1	1	1	1	1	1	1	0	1	1	1	1	1	0	1	1	1	0	1	0	1	1	1	1	1	1	1	1	1	1	1	1	1	1	1	1	1	1	1	1	1	1	1	1	1
OG0001734	0	4	2	0	1	0	2	1	0	1	2	0	0	0	0	0	3	0	2	1	3	1	1	0	0	4	0	0	0	0	1	0	0	1	0	1	1	1	1	2	0	1	0	3	0	0	1	0	1
OG0001735	0	3	1	0	0	2	1	0	0	0	0	0	1	2	3	1	3	0	3	0	0	0	0	0	3	2	0	2	0	0	0	0	1	0	0	0	0	1	0	1	0	0	0	0	1	2	1	0	3
OG0001736	0	1	0	0	0	2	0	0	0	2	0	1	0	0	1	0	2	0	0	0	3	0	0	0	0	1	0	3	0	0	0	0	0	0	1	0	0	3	1	3	1	1	0	3	1	3	0	0	0
OG0001737	0	0	2	1	4	0	0	0	0	0	0	0	0	0	1	9	0	0	11	0	2	0	0	0	0	0	0	3	0	0	1	0	0	0	0	0	0	1	0	2	0	10	1	6	2	0	0	0	0
OG0001738	0	0	0	0	0	1	0	0	0	0	0	0	8	2	0	2	7	0	1	0	4	0	0	1	5	0	0	2	4	4	1	4	0	0	0	0	0	0	0	2	0	0	0	1	0	3	0	0	13
OG0001739	1	0	0	1	0	1	0	0	1	2	0	1	2	2	1	0	1	1	0	1	2	0	0	1	4	0	1	2	2	1	0	1	0	0	0	0	0	2	0	1	1	2	1	2	2	3	0	1	4
OG0001740	1	0	1	1	1	2	1	0	1	0	2	0	1	2	1	2	1	0	1	1	0	1	1	1	1	2	0	1	1	0	2	0	3	1	0	0	0	2	1	1	0	4	1	0	2	1	1	1	1
OG0001741	1	1	1	0	1	1	1	0	1	1	1	0	2	2	1	2	1	0	1	0	1	1	1	1	1	1	1	1	2	2	2	2	1	1	0	0	0	3	1	1	1	3	1	1	1	1	1	1	1
OG0001742	1	1	1	1	1	1	1	1	1	1	1	1	1	1	1	1	1	0	2	1	1	0	0	0	1	1	1	1	1	1	1	1	1	1	0	0	0	1	1	1	1	1	1	1	1	1	1	1	1
OG0001743	1	1	1	1	1	1	1	0	1	1	1	0	1	1	1	1	1	0	1	1	1	1	1	1	1	1	0	1	1	1	1	1	1	1	0	0	0	2	1	1	1	3	1	1	1	1	1	1	1
OG0001744	1	1	1	0	1	0	0	1	1	1	1	0	0	1	1	0	1	0	1	1	1	1	1	0	1	1	1	1	1	1	1	1	1	1	0	1	1	2	1	1	1	3	1	1	1	1	1	1	1
OG0001745	1	1	1	1	1	1	0	0	1	1	1	0	1	1	1	1	1	0	1	1	1	0	1	1	1	1	1	1	1	1	1	1	1	1	1	0	1	0	3	1	1	0	1	1	1	1	1	1	1
OG0001746	1	1	1	1	1	1	1	1	1	1	1	0	1	1	1	1	1	0	1	1	1	1	1	1	1	1	1	1	1	1	1	1	1	1	2	0	0	1	1	1	1	1	1	1	1	1	1	1	1
OG0001747	1	1	0	1	1	1	0	0	1	1	1	0	1	1	1	1	1	0	1	1	1	0	1	1	1	1	1	1	1	1	1	1	1	1	1	1	1	1	1	1	1	1	1	1	1	1	1	1	1
OG0001748	1	1	1	0	1	1	1	1	1	1	1	0	0	1	1	1	1	1	1	1	1	0	1	1	1	1	1	2	0	1	1	0	1	0	1	0	1	1	1	1	1	1	1	1	1	1	1	1	1
OG0001749	1	1	1	1	1	1	1	2	1	1	1	0	2	2	1	2	0	0	1	1	1	1	1	2	2	1	1	0	2	2	1	2	1	1	0	0	0	1	1	0	1	1	1	1	0	0	1	1	2
OG0001750	1	1	0	1	0	1	0	1	1	1	1	1	1	1	1	0	1	1	1	1	1	1	1	1	1	1	1	1	1	1	1	1	1	1	1	1	1	2	1	1	1	1	1	1	1	1	1	1	1
OG0001751	1	1	1	1	1	1	1	0	1	1	1	0	1	1	1	1	1	0	1	0	0	1	0	1	1	1	1	1	1	0	1	1	2	1	0	2	1	1	1	1	1	1	1	1	1	1	1	1	1
OG0001752	1	1	1	1	1	1	1	0	1	1	1	0	1	1	1	1	1	0	1	0	1	1	1	0	1	1	2	1	1	0	1	1	2	1	0	1	1	1	1	1	1	1	1	1	1	1	1	1	1
OG0001753	1	1	1	0	1	1	1	1	1	1	1	1	1	1	1	1	0	0	1	1	1	1	1	0	0	1	1	1	1	1	1	1	1	1	1	0	0	1	1	1	1	1	1	1	1	1	1	1	1
OG0001754	1	0	1	2	0	2	1	1	0	4	0	1	0	0	1	0	1	0	0	0	4	1	0	1	0	0	1	3	0	0	0	0	2	1	0	0	0	1	4	0	1	1	1	6	0	1	1	0	0
OG0001755	1	1	1	1	1	1	1	1	1	1	1	1	1	1	1	1	1	0	1	1	1	1	1	1	1	1	1	1	1	0	1	1	1	0	0	0	0	1	1	1	1	1	1	1	1	1	1	1	1
OG0001756	1	1	1	1	1	1	1	1	1	1	1	1	1	1	1	1	1	1	1	1	1	0	1	1	1	1	1	1	1	1	1	1	1	1	1	0	0	1	1	1	1	1	1	1	1	1	1	1	1
OG0001757	1	1	1	1	1	1	1	1	1	1	1	1	1	1	1	1	1	0	1	1	1	0	0	1	1	1	1	1	1	1	1	1	1	1	1	1	1	1	1	1	1	1	1	1	1	1	1	1	1
OG0001758	1	1	0	1	0	0	1	1	1	0	1	0	1	1	1	1	1	0	1	1	1	1	1	1	1	1	1	0	1	1	1	1	1	1	1	1	1	1	1	1	1	1	1	1	1	1	1	1	1
OG0001759	1	1	1	1	1	1	1	1	1	1	1	0	1	1	1	1	1	0	2	1	2	1	1	0	1	1	1	1	1	0	1	1	0	1	1	0	0	1	1	1	1	1	2	2	1	1	1	1	1
OG0001760	1	1	1	1	1	1	1	0	1	1	1	1	1	1	0	1	1	0	1	1	1	0	1	1	1	1	1	1	1	1	1	1	1	1	0	1	1	1	1	1	1	1	1	1	1	1	1	1	1
OG0001761	0	1	1	1	2	2	2	1	0	1	1	2	0	1	2	1	3	0	1	0	1	0	0	1	1	1	0	2	0	0	0	0	0	0	1	0	0	2	1	1	1	2	1	2	1	6	1	0	0
OG0001762	0	2	1	1	2	1	1	1	1	1	1	0	1	1	0	1	1	1	2	0	1	0	2	1	1	2	1	1	1	1	2	1	1	0	0	1	1	2	0	1	1	3	0	1	1	1	0	1	0
OG0001763	0	0	1	1	0	1	0	1	1	0	1	1	1	1	1	1	1	0	1	1	1	1	0	1	1	1	1	1	1	1	1	0	1	1	1	1	1	1	1	1	1	1	1	1	1	1	1	1	1
OG0001764	0	0	0	0	0	0	0	0	2	0	0	1	2	2	0	2	2	0	0	0	2	0	0	0	2	0	0	2	2	2	0	2	0	0	0	0	0	0	0	2	2	2	0	2	2	2	0	2	2
OG0001765	1	1	1	0	1	1	1	1	1	1	1	1	1	1	1	1	1	0	2	1	1	1	1	1	1	1	0	1	1	1	1	1	1	1	1	0	1	0	1	1	1	0	1	1	1	1	1	1	1
OG0001766	1	1	1	1	1	1	1	1	1	1	1	0	0	1	1	1	1	0	1	1	1	1	1	1	1	1	0	1	1	0	1	0	1	1	1	1	1	0	1	1	1	0	1	1	1	1	1	1	1
OG0001767	1	1	1	1	1	1	1	1	1	1	1	1	1	1	1	1	2	0	2	1	1	0	1	0	1	1	1	1	1	0	1	1	1	0	1	1	1	0	1	1	1	0	1	1	1	1	1	1	1
OG0001768	1	1	1	1	1	1	1	1	1	1	1	0	1	2	1	1	1	0	1	1	1	0	1	1	1	1	0	1	1	1	0	0	1	1	0	1	1	1	1	1	1	1	1	1	1	1	1	1	1
OG0001769	1	1	0	1	1	1	0	1	1	1	1	0	1	1	1	1	1	0	1	1	1	1	1	1	1	1	1	1	1	1	1	1	1	1	1	0	0	1	1	1	1	1	1	1	1	1	1	1	1
OG0001770	1	1	1	1	1	1	0	1	1	1	1	1	1	1	1	0	1	0	1	0	1	0	1	1	1	1	0	1	1	1	1	1	1	1	2	1	1	1	2	1	1	1	1	1	1	1	1	1	1
OG0001771	1	1	1	1	1	1	1	1	1	1	1	1	1	1	1	1	1	0	1	1	1	0	0	1	1	1	1	1	1	1	1	1	1	1	0	0	0	1	1	1	1	1	1	1	1	1	1	1	1
OG0001772	1	1	1	1	1	1	1	0	1	1	1	0	1	1	1	0	1	1	1	1	1	0	1	1	1	1	1	1	1	1	1	1	1	0	1	0	1	1	1	2	1	1	1	1	2	1	1	1	2
OG0001773	2	1	1	1	0	2	1	0	1	3	1	2	0	0	0	0	0	0	1	0	3	0	1	0	0	1	0	1	0	0	0	0	0	0	2	0	0	0	0	2	2	0	2	3	1	0	1	1	1
OG0001774	1	1	1	1	1	1	1	1	1	1	1	1	1	1	1	1	1	0	1	0	1	0	1	1	1	1	1	1	1	1	1	1	1	1	1	1	1	1	1	1	1	1	1	1	1	1	1	1	1
OG0001775	1	1	1	1	1	1	0	0	1	1	1	1	1	1	1	1	1	0	1	1	1	1	0	1	1	1	0	1	1	1	1	1	2	0	1	0	0	1	1	1	1	1	1	1	1	1	0	1	1
OG0001776	1	1	1	1	1	1	0	1	1	1	1	0	1	1	0	1	1	0	1	1	2	0	1	0	1	1	0	1	1	1	1	0	1	1	1	1	1	1	1	1	1	2	1	2	1	1	1	1	1
OG0001777	1	1	1	1	1	1	1	1	1	1	1	0	1	1	1	1	1	1	1	0	1	0	1	1	1	1	1	1	1	1	1	1	1	1	1	1	1	1	1	1	1	1	1	1	1	1	1	1	1
OG0001778	1	1	1	1	1	1	1	0	1	1	1	1	1	1	1	1	1	0	1	1	1	0	1	1	1	1	2	1	1	2	1	1	1	0	0	1	1	1	1	1	1	1	1	1	1	1	1	1	1
OG0001779	1	1	1	1	1	1	1	1	1	1	1	0	1	1	1	1	1	0	1	0	1	1	1	1	1	1	1	1	1	1	1	2	1	1	1	1	1	1	1	1	1	1	1	1	1	1	1	1	1
OG0001780	1	1	1	1	1	1	1	1	1	1	1	1	1	1	1	1	1	0	1	1	1	0	0	1	1	1	1	1	1	1	1	1	1	1	1	0	0	1	1	1	1	1	1	1	1	1	0	1	1
OG0001781	1	1	1	1	1	1	1	1	1	1	1	0	1	1	1	1	1	0	1	1	1	1	1	1	1	1	1	1	1	0	0	0	0	1	1	1	1	1	1	1	1	1	1	1	1	1	1	1	1
OG0001782	1	1	1	1	1	1	0	0	1	1	1	0	1	1	1	1	1	1	1	0	1	1	1	1	1	1	1	1	1	1	1	1	1	1	1	1	1	1	1	1	1	1	1	1	1	1	1	1	1
OG0001783	1	1	1	1	1	1	0	0	1	1	1	1	1	1	1	1	1	0	1	1	1	0	1	0	1	1	0	1	1	1	1	1	1	1	1	1	1	0	1	1	0	0	1	1	1	1	0	1	1
OG0001784	1	1	1	1	1	1	1	1	1	1	1	0	1	1	1	1	1	0	1	1	1	1	1	1	1	0	1	1	1	0	1	2	2	1	0	0	0	2	1	1	1	2	1	1	1	1	1	1	1
OG0001785	1	1	1	1	1	1	0	1	1	1	1	0	1	1	1	0	1	0	1	1	1	1	1	1	1	1	1	1	1	0	1	1	1	1	1	0	0	1	1	1	1	1	1	1	1	1	1	1	1
OG0001786	1	0	0	1	0	4	0	0	0	3	0	2	2	1	2	1	1	0	1	0	2	0	0	0	1	0	0	1	0	0	0	0	0	1	1	0	1	2	1	4	2	0	1	2	2	2	1	0	0
OG0001787	0	2	2	3	0	3	2	0	1	1	1	2	0	0	0	0	2	0	2	0	2	0	0	2	0	2	0	2	0	0	1	0	0	0	0	0	0	0	0	1	2	4	0	1	0	3	0	1	0
OG0001788	0	3	2	1	2	2	2	1	0	4	3	2	0	0	1	0	1	2	3	0	1	0	1	0	0	3	0	1	0	0	2	0	1	0	2	0	0	0	2	1	0	2	2	2	0	1	1	0	1
OG0001789	0	2	1	1	2	2	2	0	0	4	1	1	1	5	0	1	1	1	1	0	0	0	2	2	5	2	1	1	1	0	0	1	1	0	0	0	1	1	0	1	1	1	0	0	4	1	0	1	0
OG0001790	0	1	1	0	1	2	1	0	1	1	1	1	1	1	1	1	1	1	0	1	2	0	1	0	1	1	1	2	1	1	1	1	0	0	0	0	0	1	0	1	2	1	0	1	1	1	0	1	1
OG0001791	0	1	1	1	1	1	1	0	1	1	1	0	1	1	1	0	1	0	1	1	1	1	1	1	1	1	1	1	1	1	1	0	1	1	0	1	1	1	1	1	1	1	1	1	1	1	1	1	1
OG0001792	0	0	0	0	1	0	0	1	1	1	1	0	0	1	1	1	1	1	0	1	1	1	1	1	1	1	1	1	1	1	1	1	1	1	1	1	1	1	1	1	1	1	1	1	1	1	1	1	1
OG0001793	1	1	1	1	1	1	1	1	1	1	1	0	1	1	1	1	1	0	1	1	1	0	1	0	1	1	1	1	1	1	1	2	1	1	0	0	0	1	1	1	1	1	1	1	1	1	1	1	1
OG0001794	1	1	1	0	1	1	1	1	1	1	1	1	1	1	1	0	1	0	1	0	0	0	2	0	1	0	0	1	1	1	0	0	1	1	1	1	1	1	1	1	1	1	1	1	1	1	1	1	1
OG0001795	1	1	1	1	1	1	1	0	1	1	1	1	1	1	1	1	1	0	1	1	1	1	0	1	1	1	1	1	1	1	0	1	1	1	1	0	1	1	1	1	1	1	1	1	1	1	1	1	1
OG0001796	1	1	1	0	1	1	1	0	1	2	2	1	0	1	0	1	1	1	1	1	1	0	1	1	0	1	1	1	0	0	1	0	1	1	1	1	1	1	0	1	2	1	1	1	1	1	1	1	0
OG0001797	1	0	0	1	1	1	1	1	1	0	1	0	1	1	1	1	1	0	1	1	1	1	1	1	1	1	1	1	1	1	1	1	1	1	1	1	1	0	1	1	1	0	1	1	1	1	1	1	1
OG0001798	1	1	1	1	1	1	1	1	1	1	1	1	1	1	1	1	1	0	1	1	1	0	0	1	1	1	1	1	1	1	1	1	1	1	0	1	1	1	1	1	1	1	1	1	1	1	1	1	1
OG0001799	1	1	1	0	1	1	1	0	1	1	1	1	1	1	1	0	1	0	1	1	1	0	1	1	1	1	1	1	1	1	1	2	1	1	1	1	1	0	1	1	1	0	1	1	1	1	1	1	1
OG0001800	1	1	1	1	1	1	1	0	1	1	1	0	1	1	1	1	1	0	1	1	1	0	2	1	1	1	1	1	1	1	1	1	1	1	1	0	0	0	1	1	1	0	0	1	1	1	1	1	1
OG0001801	1	1	1	1	1	1	0	1	1	1	1	1	1	1	1	0	1	0	1	0	1	1	0	0	1	1	0	1	1	1	0	0	1	1	1	1	1	1	1	1	1	1	1	1	1	1	1	1	1
OG0001802	1	1	1	1	1	1	1	0	1	1	1	1	1	0	1	1	1	0	1	1	1	1	1	1	0	1	1	1	1	1	1	1	1	1	1	0	0	1	1	1	1	1	1	1	1	1	1	1	1
OG0001803	1	1	1	1	1	1	1	0	1	1	1	0	1	1	1	1	1	0	1	0	1	0	1	1	1	1	1	1	1	0	1	1	2	1	0	2	1	1	1	1	1	1	1	1	1	1	1	1	1
OG0001804	1	1	1	1	1	1	0	0	1	1	1	0	1	1	1	1	1	0	1	0	1	1	0	1	1	1	1	1	1	0	1	1	2	1	0	1	1	1	1	1	1	1	1	1	1	1	1	1	1
OG0001805	1	1	1	1	1	1	1	1	1	2	2	0	0	1	0	1	1	0	1	0	2	1	1	0	0	1	0	1	0	0	3	0	0	2	2	0	1	0	1	1	1	4	1	2	1	1	1	1	0
OG0001806	1	3	1	2	2	0	1	1	0	3	1	1	0	0	1	0	3	0	2	0	1	0	4	0	1	3	1	2	0	0	0	0	1	0	2	0	0	0	1	0	0	0	1	2	0	3	1	1	1
OG0001807	1	1	1	0	1	1	1	1	1	1	1	1	1	1	0	1	1	3	1	1	1	0	1	0	1	1	2	1	1	1	1	1	1	0	1	2	2	0	1	1	1	0	1	1	1	1	3	1	1
OG0001808	2	3	3	1	1	2	3	0	1	2	2	0	1	1	1	1	1	0	2	0	1	0	1	1	1	3	1	2	1	1	1	1	0	0	1	0	0	1	0	1	1	1	1	1	1	1	0	1	1
OG0001809	1	1	1	1	1	1	1	1	1	1	1	0	1	1	1	1	1	0	1	1	1	1	1	1	1	1	2	1	1	1	1	1	1	1	0	0	0	1	0	1	1	1	1	1	1	1	0	1	1
OG0001810	1	1	1	1	1	1	1	1	0	1	1	0	1	1	1	1	1	0	2	0	1	1	1	1	1	1	1	1	1	1	0	1	1	1	1	1	1	1	2	1	1	1	1	1	1	1	1	0	1
OG0001811	1	0	0	1	1	1	1	1	1	1	1	0	1	1	1	1	1	0	0	1	1	1	1	1	0	0	1	1	1	1	1	1	1	1	0	1	1	0	0	1	1	0	1	1	1	1	1	1	1
OG0001812	1	1	1	1	1	1	1	1	1	1	1	1	1	1	1	1	1	0	1	1	1	0	1	1	1	1	1	1	1	1	1	0	1	1	0	0	0	1	1	1	1	1	1	1	1	1	1	1	1
OG0001813	0	1	2	1	1	1	2	0	1	1	1	0	2	2	1	1	1	0	1	0	0	0	1	1	1	1	1	1	2	2	0	2	1	0	2	1	1	0	0	1	1	0	0	0	1	1	0	1	1
OG0001814	0	2	0	1	1	2	0	0	2	2	1	1	0	3	1	1	1	0	2	0	2	0	0	0	0	2	0	1	0	0	1	0	0	0	0	1	1	0	1	4	2	0	2	3	1	1	0	2	0
OG0001815	1	1	1	1	1	1	1	1	1	1	1	1	0	1	1	1	1	0	1	1	1	0	1	0	1	1	0	1	0	0	1	0	1	1	1	1	1	1	1	1	1	1	1	1	1	1	1	1	1
OG0001816	1	1	1	1	1	1	1	1	1	1	1	0	1	1	1	1	1	0	1	1	1	0	1	1	1	1	1	1	1	1	1	1	1	1	1	0	0	1	1	1	1	1	1	1	1	1	1	1	1
OG0001817	1	1	1	1	1	1	1	0	1	2	1	0	1	0	1	1	2	1	1	0	1	1	0	1	1	1	0	1	1	0	1	1	1	1	1	0	1	1	1	1	1	1	1	1	1	1	1	0	1
OG0001818	1	1	1	1	1	1	1	0	1	1	1	1	0	1	1	1	1	1	1	1	1	0	1	1	1	1	1	1	1	0	1	0	1	1	0	0	0	1	0	1	1	1	1	1	1	1	0	1	1
OG0001819	1	1	1	1	1	1	1	0	1	1	1	1	0	0	0	0	1	2	1	1	1	1	1	0	1	1	0	1	0	0	1	0	1	1	1	0	0	1	2	1	1	1	1	1	1	1	1	2	1
OG0001820	1	1	1	1	1	1	1	1	1	1	1	1	1	1	1	1	1	0	1	0	1	1	1	1	1	1	1	1	1	2	1	1	1	1	0	1	1	1	1	1	1	1	1	1	1	1	1	1	1
OG0001821	1	1	1	0	1	1	1	1	1	1	1	1	1	1	1	1	1	0	1	1	1	0	1	1	1	1	0	1	1	1	1	1	1	0	1	1	1	1	1	1	1	1	1	1	1	1	1	1	1
OG0001822	1	1	1	1	1	1	1	1	1	1	1	0	1	1	1	1	1	0	1	1	1	0	1	1	1	1	1	1	1	1	1	1	1	1	0	1	1	1	1	1	1	1	1	1	1	1	0	1	1
OG0001823	1	1	1	1	0	2	0	0	1	2	1	0	1	1	0	0	4	0	1	0	3	0	0	1	1	1	1	2	1	1	0	1	0	0	0	0	0	0	0	2	2	0	1	2	2	5	0	1	1
OG0001824	1	0	0	1	0	0	0	0	2	0	0	0	0	0	0	1	3	0	35	0	1	0	0	0	1	0	0	1	0	0	0	0	0	0	0	0	0	0	0	1	0	0	1	1	3	4	0	2	4
OG0001825	2	2	1	0	1	1	1	0	1	1	1	1	1	1	3	1	1	0	1	1	1	0	1	2	1	2	1	2	1	1	1	1	2	0	0	0	0	0	0	2	1	0	2	1	2	1	0	1	1
OG0001826	1	1	1	0	1	1	0	1	1	1	1	0	1	1	1	1	1	0	1	1	1	0	1	1	1	1	1	1	1	0	1	1	1	1	1	0	0	1	1	1	1	1	1	1	1	1	1	1	1
OG0001827	1	1	1	1	1	1	1	1	1	1	1	0	1	1	1	1	1	0	1	1	1	0	1	1	1	1	0	1	1	1	1	1	1	1	1	1	1	1	1	1	1	1	1	1	1	1	1	1	1
OG0001828	1	1	1	1	1	1	1	1	1	1	1	0	1	1	1	1	1	0	1	1	1	1	1	1	1	1	0	1	1	1	1	1	1	1	0	0	0	1	1	1	1	1	1	1	1	1	1	1	1
OG0001829	0	1	1	0	1	2	1	0	2	1	1	1	1	1	2	1	1	0	2	1	2	0	2	1	1	1	1	1	1	1	1	1	0	0	0	0	0	0	1	1	1	0	0	1	1	2	0	2	1
OG0001830	0	0	0	0	0	2	0	0	3	5	1	1	1	1	0	1	0	0	0	0	2	0	0	0	1	0	0	1	1	1	0	1	0	0	0	0	0	0	0	2	2	0	0	3	3	0	0	3	1
OG0001831	1	1	1	1	1	1	0	1	1	1	1	0	1	1	1	1	1	0	1	1	1	0	1	1	1	1	0	2	1	1	1	1	1	1	0	0	0	1	1	1	1	1	1	1	1	1	1	1	1
OG0001832	1	1	1	0	1	1	1	0	1	1	1	1	1	1	1	1	1	0	1	0	1	1	0	1	1	1	1	1	1	2	1	1	1	1	0	1	1	1	1	1	1	1	1	1	1	1	1	1	1
OG0001833	2	1	1	0	1	1	2	1	1	2	1	0	1	1	2	1	1	2	1	0	1	0	1	0	0	1	1	1	1	1	1	1	1	0	1	1	1	2	2	1	0	2	2	1	1	1	0	1	0
OG0001834	1	1	1	1	1	1	1	1	1	1	1	0	1	1	1	1	1	0	1	1	1	1	1	1	1	1	1	1	1	1	1	1	1	1	0	0	0	1	1	1	1	1	1	1	1	1	1	0	1
OG0001835	1	1	1	1	1	1	1	1	1	1	1	1	1	1	1	1	1	0	1	1	1	0	0	1	1	1	1	1	1	1	1	0	0	1	1	1	0	1	1	1	1	1	1	1	1	1	1	1	1
OG0001836	1	1	1	1	1	1	1	1	1	1	1	0	1	1	1	1	1	0	1	1	1	0	2	1	1	1	1	1	1	0	1	0	0	1	0	0	0	1	1	1	1	1	1	1	1	1	1	1	1
OG0001837	1	1	1	1	1	1	1	1	1	1	1	1	1	1	1	1	1	0	1	1	1	1	1	1	1	1	1	1	1	1	1	1	1	1	1	0	0	1	1	1	1	1	1	1	1	1	1	1	1
OG0001838	1	1	1	1	1	1	1	0	1	1	1	0	1	1	1	1	1	0	1	1	1	0	1	0	1	1	1	1	1	1	1	1	1	1	1	0	0	1	1	1	1	1	1	1	1	1	1	1	1
OG0001839	2	1	1	1	1	2	1	0	0	1	1	0	0	1	1	1	1	0	1	0	2	0	1	0	1	1	0	2	0	0	1	0	1	0	1	1	1	0	0	3	1	0	1	2	1	2	0	0	1
OG0001840	1	1	1	1	1	1	1	0	1	1	1	0	1	1	1	1	1	0	1	1	1	1	0	1	1	1	1	1	1	0	1	1	1	1	1	0	0	1	1	1	1	1	1	1	1	1	1	1	1
OG0001841	1	0	2	1	0	1	1	0	1	2	1	1	0	1	1	1	1	2	2	1	0	0	0	1	1	1	3	2	0	0	0	0	0	0	0	1	0	1	1	1	2	1	1	1	1	2	0	1	1
OG0001842	1	1	1	0	1	2	1	0	1	1	1	0	1	1	1	1	1	0	1	1	1	0	1	1	1	1	1	2	1	2	1	2	1	0	1	1	1	1	1	1	1	1	1	1	1	1	0	1	1
OG0001843	1	1	1	0	1	1	1	1	1	1	1	1	1	1	1	0	1	0	1	1	1	1	1	1	1	1	0	1	1	1	1	1	1	1	1	0	0	1	1	1	1	1	1	1	1	1	1	1	1
OG0001844	1	1	1	1	0	1	1	1	1	1	0	1	1	1	1	1	1	1	1	1	1	1	1	1	1	1	1	1	1	1	1	1	1	1	1	0	0	1	1	1	1	1	1	1	1	1	1	1	1
OG0001845	1	1	1	1	1	1	1	0	1	1	1	1	1	1	0	1	1	0	1	0	1	1	1	0	1	1	1	1	1	1	1	1	1	1	1	1	1	0	1	1	1	0	1	1	1	1	1	1	1
OG0001846	1	1	1	1	1	1	1	0	1	1	1	1	1	1	1	1	1	0	1	1	1	1	1	0	0	1	0	1	1	1	1	1	1	1	0	1	1	1	1	1	1	1	1	1	1	1	1	1	0
OG0001847	1	1	1	1	1	1	1	0	1	1	1	0	1	1	1	1	1	4	1	1	1	0	0	2	2	1	0	1	2	1	1	1	0	0	2	1	1	0	1	1	1	0	1	1	1	1	0	1	2
OG0001848	0	1	1	1	1	1	1	0	1	1	1	0	1	1	1	0	1	0	1	1	1	1	1	1	1	1	1	1	1	1	1	0	1	1	0	1	1	1	1	1	1	1	1	1	1	1	1	1	1
OG0001849	0	1	1	1	1	1	1	0	1	1	1	0	1	1	1	1	1	0	1	1	1	1	1	1	1	1	1	1	1	1	1	0	1	1	0	1	1	1	1	1	1	1	1	1	1	1	1	1	1
OG0001850	0	0	0	0	1	1	0	0	1	2	2	1	1	1	1	1	2	1	0	1	2	0	0	1	1	0	1	2	1	1	1	1	0	0	0	0	0	0	1	1	2	0	0	2	0	2	1	1	1
OG0001851	0	0	0	0	1	1	0	1	1	1	0	0	0	1	0	1	1	0	1	1	1	1	1	1	1	1	0	1	1	0	1	1	1	1	1	1	1	1	1	1	1	1	1	1	1	1	1	1	1
OG0001852	1	1	1	1	1	1	1	1	1	1	1	0	1	1	1	1	1	0	1	1	1	0	1	1	1	1	1	1	1	2	1	1	1	0	1	1	1	1	0	1	1	1	1	1	1	1	0	1	1
OG0001853	1	1	1	0	1	1	1	0	1	1	1	1	1	1	1	1	1	0	1	0	1	1	1	1	1	1	0	1	1	1	1	1	2	1	0	1	1	1	1	1	1	1	1	1	1	1	1	1	1
OG0001854	1	1	1	1	1	0	1	0	1	1	1	1	1	1	3	1	0	0	1	1	1	0	1	2	2	1	0	0	1	1	1	1	1	1	0	1	1	2	1	1	1	2	1	1	0	0	1	1	3
OG0001855	1	1	1	0	1	1	1	1	1	1	1	1	1	1	1	1	1	0	1	1	1	1	1	1	1	1	0	1	1	1	1	0	1	1	1	0	0	0	1	1	1	0	1	1	1	1	1	1	1
OG0001856	1	1	1	1	1	1	1	1	1	1	1	1	0	1	1	1	1	0	1	1	1	0	1	1	1	1	1	1	1	1	1	0	1	0	0	1	1	1	1	1	1	1	1	1	1	1	0	1	1
OG0001857	1	1	1	1	1	1	1	1	1	1	1	0	1	1	1	1	1	0	1	1	1	1	1	1	1	1	1	1	1	1	1	0	1	1	0	0	0	1	1	1	1	1	1	1	1	1	1	1	1
OG0001858	1	1	1	1	1	1	1	1	1	1	1	1	1	1	1	1	1	0	1	1	1	1	1	1	1	1	1	1	1	1	1	1	1	1	1	0	0	0	1	1	1	0	1	1	1	1	1	1	1
OG0001859	1	1	1	1	1	1	1	0	1	1	1	1	1	1	1	1	1	0	1	1	1	0	0	1	1	1	1	1	1	1	1	1	1	1	1	0	0	1	1	1	1	1	1	1	1	1	1	1	1
OG0001860	1	1	1	1	1	1	1	1	1	1	1	0	1	1	1	1	1	0	1	1	1	0	1	1	1	1	1	1	1	1	1	0	1	0	1	1	1	0	0	1	1	0	1	1	1	1	0	1	1
OG0001861	1	1	1	0	1	1	1	1	0	1	1	1	1	1	1	2	1	0	1	1	1	1	1	1	1	1	1	1	1	1	1	1	1	1	1	1	1	1	1	1	1	1	1	1	1	1	1	0	1
OG0001862	1	1	1	1	1	1	1	0	1	1	1	0	1	1	1	1	1	1	1	0	0	1	1	1	1	1	1	1	1	1	1	1	1	1	0	1	1	1	1	1	1	1	1	1	1	1	0	1	1
OG0001863	1	1	1	1	1	1	1	1	0	1	1	0	1	1	1	1	1	0	1	0	1	0	2	1	1	1	1	1	0	1	1	1	1	1	0	1	1	1	1	1	1	1	1	1	1	1	1	0	1
OG0001864	1	1	1	2	1	1	1	1	1	1	1	1	1	1	1	1	1	0	1	1	1	0	0	1	1	1	1	1	1	1	1	1	1	0	1	1	1	0	0	1	1	0	1	1	1	1	0	1	1
OG0001865	1	0	2	0	1	1	1	1	1	1	0	0	0	0	1	0	1	1	0	1	1	1	1	0	1	0	0	1	0	0	1	0	1	1	1	1	1	1	1	1	1	1	1	1	1	1	1	1	1
OG0001866	1	1	1	1	1	1	1	0	1	1	1	1	1	1	1	1	1	0	1	1	1	1	1	1	1	1	0	1	1	1	1	1	1	1	0	0	0	1	0	1	1	1	1	1	1	1	1	1	1
OG0001867	1	1	1	1	1	1	1	0	1	1	1	0	1	1	1	1	1	0	1	1	1	0	1	1	1	1	1	1	1	1	1	1	1	0	1	1	1	1	1	1	1	1	1	1	1	1	0	1	1
OG0001868	0	0	0	1	0	4	0	0	3	1	0	0	2	2	0	17	0	0	0	0	2	0	0	0	0	0	0	11	0	0	0	0	0	0	5	0	0	2	2	0	1	5	0	2	0	0	0	1	3
OG0001869	0	0	0	1	0	2	0	0	1	2	1	1	1	1	1	1	1	1	2	1	0	2	0	2	1	0	0	3	1	1	0	1	1	2	0	0	0	2	1	3	1	1	1	1	3	0	1	1	1
OG0001870	1	1	1	1	0	1	1	1	1	2	1	0	1	1	1	1	1	1	1	1	2	0	0	1	1	1	0	1	1	1	1	1	1	0	0	0	0	2	1	1	1	1	1	2	1	2	0	1	1
OG0001871	1	0	0	1	1	1	1	1	1	1	1	1	1	1	1	1	1	0	1	1	1	0	1	1	1	1	1	1	1	1	0	1	0	0	1	2	1	1	1	1	1	1	1	1	1	1	0	1	1
OG0001872	2	2	2	1	0	1	1	1	1	1	1	1	1	1	1	0	1	1	1	0	1	0	1	1	0	2	1	1	1	0	1	1	0	1	1	1	1	0	1	1	1	0	2	1	1	1	1	1	2
OG0001873	1	1	1	1	1	1	1	1	1	1	1	0	1	0	1	1	1	0	1	1	1	0	1	1	1	1	1	1	1	1	1	1	1	0	0	1	1	1	1	1	1	1	1	1	1	1	1	1	1
OG0001874	1	0	4	0	1	0	2	0	1	2	1	0	0	1	2	0	0	0	0	0	1	0	1	1	0	1	1	0	0	0	0	1	1	0	4	0	0	0	3	4	0	0	2	0	4	0	3	0	3
OG0001875	1	1	1	1	1	1	1	0	1	1	1	0	1	1	1	1	1	0	1	1	1	0	1	1	1	1	1	1	1	1	1	1	1	1	0	0	0	1	1	1	1	1	1	1	1	1	1	1	1
OG0001876	1	1	1	1	1	1	1	0	1	1	1	1	1	1	1	1	0	0	1	1	1	0	1	1	1	1	0	1	1	1	0	0	1	1	1	1	1	1	1	1	1	1	1	1	1	1	1	1	1
OG0001877	2	2	0	2	0	2	0	0	0	2	0	0	0	2	2	0	2	0	1	0	0	2	0	0	0	2	0	2	2	2	2	2	2	0	1	0	0	2	0	4	0	2	2	2	2	2	0	0	2
OG0001878	2	2	1	1	1	1	1	0	1	1	1	0	1	1	1	1	1	0	2	1	1	0	1	1	1	2	0	1	0	1	0	1	1	0	1	1	1	1	1	1	1	1	1	1	1	1	0	1	1
OG0001879	1	1	1	0	1	1	1	0	1	1	1	2	1	1	0	1	1	0	1	1	1	1	1	1	1	1	1	1	1	1	1	1	1	1	1	0	0	0	1	1	1	0	1	1	1	1	1	1	1
OG0001880	1	1	1	1	1	1	1	1	1	0	1	0	0	1	1	1	1	0	1	0	1	0	0	0	1	1	1	1	1	1	1	0	1	0	0	1	0	1	1	1	1	1	1	1	1	0	1	1	1
OG0001881	1	1	1	1	0	1	1	0	1	1	1	0	1	1	1	1	0	0	1	1	1	0	0	0	2	1	0	1	1	2	2	1	0	0	0	1	1	1	1	1	1	1	1	1	1	0	2	1	1
OG0001882	1	1	1	1	0	1	1	0	1	1	1	1	1	1	1	0	1	1	1	1	1	1	0	1	0	1	1	1	1	1	0	1	1	1	1	1	0	1	1	1	1	1	1	1	1	1	1	1	0
OG0001883	1	1	1	1	1	1	1	0	1	1	1	0	0	0	1	0	1	1	1	1	1	1	1	0	1	0	0	1	0	0	1	0	1	1	1	1	1	0	1	1	1	0	1	1	1	1	1	1	1
OG0001884	0	1	1	1	1	1	1	0	1	1	1	0	1	1	1	0	1	0	1	1	1	0	1	1	1	1	1	1	1	1	1	0	1	1	0	1	1	1	1	1	1	1	1	1	1	1	1	1	1
OG0001885	0	1	1	1	1	1	1	0	1	1	1	0	1	1	1	0	1	0	1	1	1	1	1	1	1	1	0	1	1	1	1	0	1	1	0	1	1	1	1	1	1	1	1	1	1	1	1	1	1
OG0001886	0	0	1	2	1	0	0	0	1	1	0	0	0	1	0	0	0	0	15	0	1	0	0	0	3	0	0	2	0	0	1	0	0	0	2	0	1	1	0	1	0	0	0	4	3	0	0	0	3
OG0001887	1	1	0	0	1	1	1	1	1	1	1	2	1	1	1	0	1	0	1	1	1	1	1	1	1	1	1	1	1	1	1	1	1	1	0	0	0	1	0	1	1	1	1	1	1	1	1	1	1
OG0001888	1	1	1	1	1	1	0	1	1	1	1	0	1	1	1	1	1	0	1	0	1	0	1	1	1	1	1	1	1	1	1	1	1	1	1	1	1	1	0	1	1	1	1	1	1	1	1	1	1
OG0001889	2	0	0	0	2	2	1	2	2	3	1	0	0	0	4	0	1	1	1	0	0	0	1	0	0	0	0	1	0	0	0	0	0	0	1	0	0	3	3	2	0	3	1	0	3	4	2	1	2
OG0001890	1	1	1	1	1	1	1	1	1	1	1	1	1	1	1	1	1	1	1	1	1	0	1	1	0	1	1	1	1	1	1	1	1	0	1	0	0	1	1	1	1	1	1	1	1	1	1	1	1
OG0001891	1	1	1	0	1	1	1	0	1	1	1	1	1	1	1	1	1	1	1	1	1	0	0	1	1	1	1	1	1	1	1	2	1	0	0	1	1	1	0	1	1	1	1	1	1	1	0	1	1
OG0001892	1	1	1	1	1	1	1	1	1	1	1	0	1	1	1	1	1	1	1	0	1	0	1	0	1	1	1	1	1	1	1	1	0	1	0	1	1	1	1	1	1	1	1	1	1	1	1	1	0
OG0001893	1	1	1	1	1	1	1	0	1	1	1	0	1	1	1	1	1	1	2	1	1	0	1	1	0	1	1	1	1	1	1	1	1	0	1	1	1	1	0	1	1	1	1	1	1	1	0	1	0
OG0001894	1	1	1	1	1	1	1	1	1	1	1	0	1	1	1	1	1	0	1	1	1	1	0	1	1	1	0	1	1	0	1	0	1	1	0	0	0	1	1	1	1	1	1	1	1	1	1	1	1
OG0001895	1	1	1	0	1	1	1	1	0	1	1	0	1	1	1	1	1	0	1	1	1	0	1	1	1	1	1	1	1	1	1	1	1	1	1	1	1	1	1	1	1	1	1	1	1	1	1	0	1
OG0001896	1	1	1	0	1	1	1	1	1	1	1	1	1	1	0	1	1	0	1	1	1	1	1	1	1	1	1	1	1	1	1	0	1	1	0	1	1	0	1	1	1	0	1	1	1	1	1	1	1
OG0001897	1	1	1	1	1	1	1	0	1	1	1	1	0	1	1	1	1	0	1	1	1	0	1	1	1	1	1	1	1	1	1	1	1	1	0	0	0	1	1	1	1	1	1	1	1	1	1	1	1
OG0001898	1	1	1	1	1	1	1	0	1	1	1	1	1	1	1	1	0	0	1	1	1	1	1	0	1	1	1	1	1	1	1	1	1	1	0	0	0	1	1	1	1	1	1	1	1	0	1	1	1
OG0001899	1	0	1	1	1	1	1	0	1	1	1	1	1	1	1	1	1	0	1	1	1	0	1	2	1	1	0	1	1	1	0	1	1	1	1	1	1	1	1	1	1	1	1	1	1	1	1	1	1
OG0001900	1	1	1	1	1	1	1	1	1	1	1	1	1	1	2	1	1	0	1	1	1	1	1	1	0	1	0	1	0	1	1	1	1	1	0	0	0	1	0	1	1	1	0	1	1	1	1	1	1
OG0001901	1	0	0	0	0	1	0	1	1	1	0	1	1	1	1	1	1	0	0	1	1	1	0	1	1	0	2	1	1	2	1	1	1	1	1	1	1	1	1	1	1	1	1	1	1	1	1	1	1
OG0001902	1	1	1	1	1	1	1	0	1	1	1	1	1	1	1	1	1	0	1	1	1	0	0	1	1	1	1	1	1	1	1	2	1	0	1	1	1	0	1	1	1	0	1	1	1	1	0	1	1
OG0001903	1	1	1	1	1	1	1	1	1	1	1	1	1	1	1	1	1	0	1	1	1	1	1	1	1	1	1	1	1	1	1	1	1	1	1	0	0	1	1	1	1	1	1	1	1	1	1	1	0
OG0001904	2	3	1	0	1	2	2	0	1	1	2	0	1	1	1	0	1	0	2	0	1	0	1	1	1	3	0	1	0	0	1	0	1	0	2	0	0	1	2	1	1	1	2	1	1	2	1	1	2
OG0001905	1	0	0	1	1	2	0	1	1	1	1	1	1	1	1	1	1	0	0	1	1	0	0	1	1	1	1	1	1	1	0	1	2	1	1	1	1	1	1	4	1	1	1	1	1	1	1	1	1
OG0001906	1	1	1	0	1	1	1	1	1	1	1	0	1	1	1	1	1	1	2	1	1	0	1	1	0	0	1	1	1	2	0	0	1	1	2	0	0	1	1	1	1	1	1	1	1	1	1	1	1
OG0001907	1	1	1	1	1	1	1	1	0	1	1	1	1	1	1	1	1	0	1	1	1	1	0	1	1	1	0	1	1	2	1	1	1	1	0	0	0	0	1	1	1	0	1	1	1	1	1	0	1
OG0001908	1	1	0	1	0	0	0	0	0	2	0	1	1	2	1	1	0	0	0	0	1	0	0	1	2	1	1	1	1	0	0	1	0	0	0	0	0	1	1	1	2	0	1	2	3	4	0	0	2
OG0001909	1	1	1	1	2	1	1	1	1	1	1	0	1	1	1	1	1	0	1	1	1	0	2	0	1	1	1	1	1	2	1	2	2	0	0	0	0	0	0	1	1	0	1	1	1	1	0	1	1
OG0001910	1	2	1	0	0	1	1	1	1	1	1	0	1	1	1	1	0	0	1	1	1	0	0	1	1	3	0	1	1	1	1	1	0	0	1	1	1	0	0	2	1	0	1	1	1	1	0	1	0
OG0001911	1	1	1	1	1	1	1	0	1	1	1	1	1	1	1	1	1	0	1	0	1	0	1	1	1	1	1	1	1	0	1	1	1	1	1	0	0	1	1	1	1	1	1	1	1	1	1	1	1
OG0001912	1	1	1	1	1	1	1	1	0	1	1	1	1	1	1	1	1	1	1	0	1	0	1	1	1	1	1	1	1	1	1	0	1	1	1	1	1	1	1	1	1	1	1	1	1	1	1	0	1
OG0001913	1	1	1	0	1	1	1	1	1	1	1	0	1	1	1	1	1	0	1	1	1	0	1	0	1	1	1	1	1	1	1	1	1	1	0	0	0	1	1	1	1	1	1	1	1	1	1	1	1
OG0001914	1	1	0	1	1	1	0	1	1	1	1	0	0	1	1	1	1	1	1	1	1	0	1	1	1	1	1	1	1	1	1	1	1	0	1	1	1	0	1	1	1	1	1	1	1	1	1	1	1
OG0001915	1	1	0	1	1	1	0	1	1	1	1	0	1	0	1	1	1	0	1	1	1	0	1	1	0	1	1	1	1	1	1	1	1	0	2	1	1	1	0	1	1	1	1	1	1	1	1	1	0
OG0001916	1	0	0	1	1	1	0	0	1	1	0	1	1	1	1	1	1	0	0	1	1	0	1	1	0	0	1	1	1	1	1	1	1	1	0	1	1	1	1	1	1	1	1	1	1	1	1	1	0
OG0001917	1	1	1	1	1	1	1	0	1	1	1	1	1	1	1	0	1	1	1	0	1	0	1	1	1	1	1	1	1	1	1	1	1	1	0	1	1	1	1	1	1	1	1	1	1	1	1	1	1
OG0001918	1	1	1	1	1	1	0	1	1	1	1	0	0	1	1	0	1	0	1	1	1	1	1	1	1	1	1	1	1	1	1	1	1	1	0	0	0	1	1	1	1	1	1	1	1	1	1	1	1
OG0001919	1	1	1	1	1	1	1	0	1	1	1	1	1	1	1	1	1	0	1	1	1	0	1	1	1	1	0	1	1	1	1	1	0	0	1	1	1	0	1	1	1	0	1	1	1	1	1	1	1
OG0001920	0	1	0	1	1	0	1	0	1	1	0	0	1	0	0	1	0	0	0	1	2	1	0	1	1	1	0	0	1	1	1	1	1	1	1	1	1	2	1	2	2	0	1	2	1	1	0	1	1
OG0001921	0	2	1	1	1	1	1	0	2	1	1	0	1	3	2	1	1	0	3	0	3	0	0	1	0	2	0	1	1	1	1	1	2	0	0	1	1	0	2	2	1	0	1	1	1	1	0	2	0
OG0001922	0	1	0	0	0	1	0	0	1	1	1	0	2	1	1	1	1	0	1	0	1	0	0	2	2	2	0	1	2	3	1	3	1	0	0	1	0	2	1	1	1	3	1	1	1	1	0	1	2
OG0001923	0	0	1	1	1	1	0	0	2	1	0	0	0	2	0	0	1	0	11	0	1	0	0	0	0	43	0	11	0	0	0	0	0	0	0	0	0	0	2	0	0	1	0	2	0	0	0	2	0
OG0001924	0	0	0	1	1	0	0	1	0	0	0	0	1	1	1	1	0	0	1	1	1	1	1	1	1	1	1	1	1	1	1	1	1	1	1	1	1	1	1	1	1	1	1	1	1	1	1	1	1
OG0001925	0	0	0	0	0	5	1	0	0	0	0	0	0	1	0	0	2	0	0	0	0	5	0	1	0	0	0	6	0	0	0	0	1	0	0	0	0	0	1	0	0	0	0	1	0	3	0	0	2
OG0001926	2	1	2	1	2	2	2	0	1	1	2	1	0	0	0	0	1	1	2	0	2	0	2	0	0	2	0	1	0	0	2	0	2	0	1	0	0	1	3	1	1	2	1	1	1	1	0	1	1
OG0001927	1	1	2	1	1	1	2	1	0	3	1	0	0	0	1	0	3	0	1	0	0	0	1	0	2	1	0	1	0	0	1	0	2	1	0	1	1	0	0	1	1	0	2	0	1	1	1	0	1
OG0001928	1	1	1	1	1	1	1	1	1	1	1	1	1	1	1	1	1	0	1	1	1	0	1	1	0	1	0	1	1	0	1	1	1	1	1	0	0	0	1	1	1	0	1	0	1	1	1	1	1
OG0001929	1	1	1	0	1	1	1	0	1	1	1	0	1	1	1	1	1	0	1	1	1	1	1	1	1	0	1	1	1	1	1	1	0	1	0	0	0	0	1	1	1	0	1	1	1	1	1	1	1
OG0001930	1	1	1	1	1	1	1	1	1	1	1	0	1	1	1	1	1	1	1	1	1	0	1	1	1	1	0	1	1	1	1	0	1	0	1	1	0	1	1	1	1	1	1	1	1	1	0	1	1
OG0001931	1	1	1	0	1	1	1	1	1	1	1	0	1	1	0	1	1	0	1	1	1	1	1	0	1	1	1	1	1	1	0	1	0	1	1	1	1	0	0	0	1	0	1	1	1	0	1	1	1
OG0001932	1	1	1	1	1	1	1	0	1	1	1	0	1	1	1	1	1	1	2	1	1	0	1	1	1	1	1	1	1	1	1	1	1	1	1	0	0	1	1	1	1	1	1	1	1	1	1	1	1
OG0001933	1	3	0	0	0	2	1	0	1	3	0	1	0	0	0	0	2	0	0	0	3	0	0	0	0	3	0	2	0	0	0	0	0	0	0	0	0	2	1	1	3	1	1	3	1	1	0	1	0
OG0001934	2	2	2	1	2	1	1	0	0	1	1	1	1	1	1	1	1	0	1	0	1	0	1	1	3	2	0	1	1	2	0	1	2	0	0	0	0	0	0	1	1	0	1	1	1	2	0	0	2
OG0001935	1	1	1	1	1	1	1	0	1	1	1	0	1	1	1	1	2	0	1	0	1	1	1	1	1	1	0	1	1	1	1	1	1	3	0	1	1	1	1	1	1	1	1	1	1	1	0	1	1
OG0001936	1	1	1	1	1	1	0	0	1	1	1	0	1	1	1	1	1	0	1	1	1	1	0	1	1	1	0	1	1	1	1	1	1	1	0	1	1	1	1	1	1	1	1	1	1	1	1	1	1
OG0001937	1	1	1	1	1	1	1	1	1	1	1	0	0	1	1	5	1	0	1	1	0	1	1	1	1	1	1	1	1	1	1	1	1	1	0	0	0	1	1	1	1	1	1	0	1	1	1	1	1
OG0001938	1	1	1	1	0	1	1	1	1	1	1	0	1	1	0	1	0	0	2	1	1	0	0	1	1	1	0	2	1	1	1	1	1	0	1	1	1	0	1	1	1	0	1	1	1	1	0	1	1
OG0001939	1	1	1	1	1	1	1	1	1	1	1	0	1	1	1	1	1	0	1	1	1	0	1	1	1	1	0	1	1	1	1	1	1	0	1	1	0	1	1	1	1	1	1	1	1	1	0	1	1
OG0001940	1	1	1	0	1	1	1	0	1	1	1	1	1	1	1	1	1	0	1	1	1	0	1	1	0	1	1	1	1	1	0	1	1	1	1	0	0	1	1	1	1	1	1	1	1	1	1	1	0
OG0001941	1	3	2	3	1	1	5	0	1	5	2	1	0	0	0	0	0	0	2	1	1	0	0	0	0	3	0	1	0	0	1	0	0	0	1	0	0	0	2	1	1	0	0	1	1	1	0	1	1
OG0001942	1	2	2	1	1	1	2	0	1	1	1	1	1	0	0	1	1	1	2	0	1	0	1	0	1	2	0	1	1	1	1	1	1	0	1	1	1	1	1	1	1	1	1	1	1	1	1	1	1
OG0001943	0	0	0	0	0	0	0	1	14	0	0	0	0	0	0	0	0	0	0	1	0	0	0	0	0	0	0	0	0	0	0	0	0	0	0	1	0	0	0	0	0	2	0	0	0	0	0	11	0
OG0001944	2	0	1	0	1	0	1	1	0	1	2	1	0	0	0	0	0	0	3	0	1	0	0	0	0	0	0	1	0	0	1	0	1	0	0	0	0	0	5	1	2	0	1	0	0	0	0	0	1
OG0001945	1	1	1	0	1	1	0	1	1	1	1	0	1	1	1	1	0	0	1	1	1	1	1	1	1	1	1	1	1	1	1	1	1	1	0	0	0	1	1	1	1	1	1	1	1	1	1	1	1
OG0001946	1	1	1	1	1	1	1	0	1	1	1	0	1	1	1	1	1	0	1	1	1	0	0	1	0	2	0	1	1	1	1	1	1	1	0	0	0	1	1	1	1	1	1	1	1	1	1	1	1
OG0001947	2	1	1	2	2	2	1	1	1	1	1	0	1	1	0	1	0	0	1	1	0	0	2	1	0	1	1	1	1	1	2	1	1	0	1	1	1	1	0	1	0	1	2	0	0	1	0	1	1
OG0001948	1	1	1	1	1	1	1	0	1	1	1	0	1	1	1	1	1	0	1	1	1	0	1	0	1	1	1	1	1	1	1	1	1	0	1	1	1	1	1	1	1	1	1	1	1	1	1	1	1
OG0001949	1	1	1	1	1	1	1	0	1	1	1	1	1	1	1	0	1	0	1	1	1	0	1	1	0	1	1	1	1	0	1	1	1	0	2	1	1	1	0	2	1	1	1	1	1	1	0	1	0
OG0001950	1	1	1	1	1	1	1	1	1	1	1	0	1	1	1	1	1	0	1	1	1	1	1	0	1	1	1	1	1	1	1	1	1	1	0	0	0	1	1	1	1	1	1	1	1	1	1	1	1
OG0001951	1	1	1	1	0	1	1	0	1	1	1	0	1	1	2	1	1	0	1	1	1	1	0	1	1	1	0	1	0	1	1	0	1	1	1	0	0	0	1	1	1	0	1	1	1	1	1	1	1
OG0001952	2	2	2	1	1	2	1	0	1	1	2	1	0	1	1	1	1	0	2	0	1	0	1	0	1	2	0	1	0	0	1	0	1	0	1	0	0	1	2	1	1	1	1	2	1	2	0	1	1
OG0001953	1	1	1	1	1	1	1	1	1	1	2	1	1	1	1	1	1	0	1	0	1	1	0	1	1	1	1	1	1	1	1	1	1	1	2	0	0	1	1	1	1	1	1	1	1	1	1	1	1
OG0001954	1	1	1	1	0	1	1	0	1	1	1	1	1	1	1	1	1	0	1	1	1	0	1	1	1	1	1	1	1	0	1	1	1	0	0	1	1	0	0	1	1	0	1	1	1	1	0	1	1
OG0001955	1	3	2	1	1	1	2	1	1	2	1	0	0	0	2	0	1	0	2	0	0	0	0	0	0	3	0	2	0	0	2	0	0	0	3	0	0	1	1	0	0	2	2	0	0	2	1	1	0
OG0001956	1	2	2	0	2	1	2	0	1	1	1	0	1	1	1	1	1	0	2	0	1	0	2	2	2	1	1	1	1	2	1	1	2	0	0	0	0	0	0	1	1	0	2	1	1	1	0	1	2
OG0001957	0	1	1	0	1	1	1	0	1	1	1	0	1	1	1	0	1	0	1	1	1	1	1	1	1	1	1	0	1	1	1	0	1	1	0	1	1	1	1	1	1	1	1	1	1	1	1	1	1
OG0001958	0	0	0	0	0	1	0	0	1	1	1	0	1	1	1	1	2	2	2	0	1	0	0	1	1	1	1	1	1	1	1	1	1	1	0	0	0	1	1	2	2	1	2	1	2	1	0	1	1
OG0001959	0	0	0	0	0	0	0	0	1	1	0	0	6	0	0	0	4	0	11	0	3	0	0	0	3	0	0	4	2	2	1	2	1	0	0	0	0	1	0	1	0	0	0	0	0	1	0	1	8
OG0001960	2	1	1	1	1	1	1	1	1	1	1	0	1	1	1	1	1	0	1	0	1	0	1	1	1	1	1	1	1	1	1	1	0	0	1	1	1	1	0	1	1	1	2	1	1	1	1	1	1
OG0001961	2	3	1	2	1	0	1	0	3	1	4	0	0	0	1	0	2	0	1	0	3	0	1	0	0	3	0	2	0	0	1	0	0	0	0	0	0	1	0	1	0	1	3	3	0	3	1	3	1
OG0001962	1	1	1	1	1	1	1	0	0	1	1	1	1	1	1	1	1	0	1	0	1	1	1	1	1	1	1	1	1	0	1	0	1	1	0	1	1	1	1	1	1	1	1	1	1	1	1	0	1
OG0001963	2	1	1	1	1	1	1	2	1	2	2	0	0	0	1	0	0	1	1	1	1	0	1	0	0	1	0	0	0	0	0	0	2	1	1	1	1	2	1	1	1	2	2	1	1	0	1	1	0
OG0001964	1	1	1	1	1	1	0	0	1	1	1	1	1	1	1	1	1	1	1	1	1	0	1	1	1	1	1	1	0	1	1	1	1	0	1	1	1	0	0	1	1	0	1	1	1	1	0	1	1
OG0001965	1	1	1	0	1	1	1	1	1	1	1	0	1	1	1	1	1	0	1	0	1	1	1	0	1	1	1	1	1	1	1	1	1	1	1	0	1	1	1	1	1	1	1	1	1	1	1	1	1
OG0001966	1	1	1	0	1	1	1	0	1	1	2	0	1	1	1	1	1	0	2	1	1	0	1	0	1	1	1	1	1	1	1	1	1	0	0	1	1	0	0	1	1	0	1	1	1	1	0	1	1
OG0001967	1	1	1	1	1	1	1	1	1	1	1	0	1	1	1	1	1	1	1	1	1	0	1	1	1	1	1	1	1	1	1	0	1	0	1	0	1	1	1	1	1	1	1	1	1	1	0	1	1
OG0001968	1	1	1	1	1	1	1	0	1	1	1	0	0	0	1	0	1	0	1	1	1	1	1	1	1	1	0	1	0	0	1	0	1	1	1	1	1	1	1	1	1	1	1	1	1	1	1	1	1
OG0001969	1	1	1	2	1	1	1	1	1	1	1	0	1	1	1	1	1	0	1	0	1	0	1	1	1	1	1	1	1	1	3	1	1	0	1	0	0	1	1	1	1	1	1	1	1	1	0	1	1
OG0001970	1	1	1	1	1	1	1	0	1	1	1	0	1	1	1	1	1	0	1	1	1	0	1	1	1	1	1	1	2	1	0	2	1	1	0	0	0	1	1	1	1	1	1	1	1	1	1	1	1
OG0001971	1	1	1	1	0	1	2	1	1	1	1	0	1	1	1	1	1	1	0	1	1	1	0	1	1	1	0	1	1	1	1	1	1	1	1	0	0	1	1	1	1	1	1	1	1	1	1	1	1
OG0001972	1	1	1	1	1	1	1	1	1	1	1	0	0	1	1	1	1	1	1	1	1	0	1	0	1	1	0	1	0	0	1	0	1	0	0	1	1	1	1	1	1	1	1	1	1	1	0	1	1
OG0001973	1	1	1	1	1	1	1	1	1	1	1	1	1	1	0	1	1	0	1	1	1	1	0	0	0	0	1	1	1	1	0	1	1	1	0	1	1	0	0	1	1	0	0	1	1	1	0	1	0
OG0001974	1	2	1	1	1	0	1	1	2	0	2	1	2	1	0	2	0	1	1	1	0	1	1	0	0	2	1	1	1	2	1	2	1	1	1	1	1	1	1	0	1	1	2	0	0	0	1	2	1
OG0001975	1	1	1	1	1	1	1	0	2	1	1	0	1	1	0	1	1	0	1	0	1	0	1	1	1	2	0	1	1	1	1	0	1	0	1	1	1	1	1	1	1	1	1	1	1	1	0	1	1
OG0001976	0	6	3	1	1	1	3	0	1	0	2	0	0	0	0	1	0	1	3	0	0	0	1	0	0	5	0	0	0	0	0	0	4	0	0	0	0	1	0	2	0	1	0	0	1	0	0	2	0
OG0001977	0	3	2	1	2	2	4	0	0	1	1	0	0	0	1	0	2	1	4	0	0	0	4	2	1	3	0	1	0	0	2	0	2	0	0	0	0	2	2	1	0	2	1	0	1	3	1	0	1
OG0001978	0	0	0	1	0	2	0	0	3	1	0	0	1	1	1	1	1	0	0	1	1	0	0	0	1	0	2	1	1	1	1	1	2	1	2	0	1	1	1	1	1	1	1	1	1	0	0	3	1
OG0001979	1	1	1	1	1	1	1	1	0	1	1	0	1	1	1	1	1	1	1	0	1	1	1	1	1	1	2	1	1	1	1	1	1	1	1	0	0	2	0	1	1	1	1	1	1	1	1	0	1
OG0001980	1	1	1	1	1	1	1	1	1	1	1	0	1	1	1	1	1	0	1	0	1	1	0	0	1	1	1	1	1	1	1	1	1	1	0	0	0	1	1	1	1	1	1	1	1	1	1	1	1
OG0001981	1	1	1	1	1	3	1	0	1	1	1	0	1	2	1	1	1	0	2	0	1	0	1	1	0	1	1	2	1	1	1	1	0	0	0	0	0	1	1	1	0	1	2	1	0	1	0	1	0
OG0001982	1	1	0	1	1	1	1	0	1	1	1	0	1	1	1	1	1	0	1	1	1	0	0	1	1	1	1	1	1	1	2	1	1	0	1	0	0	1	1	1	1	1	1	1	1	1	0	1	1
OG0001983	3	2	2	0	4	2	2	0	0	1	2	1	0	0	6	0	2	0	2	0	1	0	0	0	0	2	0	2	0	0	2	0	0	0	0	0	0	0	0	1	0	0	4	1	0	2	0	0	0
OG0001984	1	1	1	0	1	1	1	1	1	1	1	1	1	1	1	1	1	0	1	1	1	1	0	1	1	1	1	1	1	1	0	1	1	1	0	0	0	0	1	1	1	0	1	1	1	1	1	1	1
OG0001985	1	1	1	1	1	1	1	1	1	1	1	0	1	1	1	1	1	0	1	0	0	0	1	1	1	1	1	1	1	1	1	1	1	0	1	1	1	1	1	1	1	1	1	1	1	1	0	1	1
OG0001986	1	2	1	2	3	1	1	0	0	1	1	1	0	0	1	0	3	1	2	0	1	0	1	0	0	2	0	1	0	0	0	0	2	0	2	0	0	2	0	2	1	2	1	1	1	3	0	1	0
OG0001987	1	2	1	0	1	1	1	2	1	1	1	0	1	1	1	1	1	0	1	1	0	0	1	1	1	1	1	1	1	1	2	1	1	1	1	0	0	1	1	1	0	1	2	0	1	2	1	1	1
OG0001988	1	1	1	1	1	1	1	0	1	1	0	1	1	1	1	1	1	0	0	1	1	0	0	1	1	1	1	1	1	1	1	1	1	0	2	1	1	1	1	1	1	1	1	1	1	1	0	1	1
OG0001989	1	1	0	0	1	1	0	1	1	1	1	0	0	1	1	1	0	0	1	1	1	1	1	1	0	1	0	1	0	0	1	0	1	1	1	1	1	1	1	1	1	1	1	1	1	1	1	1	1
OG0001990	1	2	3	1	1	1	0	0	1	1	1	1	0	0	1	0	1	1	1	0	1	0	2	1	1	1	0	0	0	0	1	0	1	0	2	0	0	3	1	1	1	3	1	1	0	2	2	0	1
OG0001991	1	1	1	0	0	1	0	1	1	1	1	0	1	1	1	0	1	0	1	1	1	0	0	0	1	1	1	1	1	1	1	1	1	1	0	1	1	1	1	1	1	1	1	1	1	1	1	1	1
OG0001992	1	1	1	1	1	1	1	1	1	1	1	0	1	1	1	1	1	0	1	1	1	0	0	1	1	1	1	1	1	1	1	1	1	0	0	1	0	1	1	1	1	1	0	1	1	1	0	1	1
OG0001993	0	1	1	1	0	1	1	0	0	1	1	0	1	1	1	1	1	0	1	1	1	1	1	1	0	1	0	1	1	1	1	1	1	1	0	1	1	1	0	1	1	1	0	1	1	1	1	0	1
OG0001994	0	0	2	0	1	3	0	0	2	2	0	1	0	1	4	2	1	0	1	0	1	0	1	0	0	2	0	1	2	0	0	1	0	0	6	0	0	0	0	0	1	0	0	0	1	1	0	0	1
OG0001995	0	0	0	1	0	2	0	1	1	1	1	1	1	1	1	0	0	0	1	1	1	0	1	2	1	0	1	1	1	1	1	0	1	0	0	1	1	1	1	1	1	1	1	1	1	1	0	1	1
OG0001996	1	1	1	1	1	1	1	1	1	1	1	0	0	1	1	1	1	0	1	1	1	1	1	1	1	1	0	1	1	1	1	0	1	1	1	0	0	0	1	1	1	0	1	1	1	1	1	1	1
OG0001997	1	0	0	0	0	1	0	1	1	1	1	1	1	1	1	1	0	0	0	1	1	0	0	1	1	1	1	1	1	0	0	1	2	1	2	1	1	1	1	4	1	1	1	1	1	1	1	1	1
[truncated: 45,329 more rows]
[truncated: 111 more columns]
