# Supplementary material for: Taxonomic Novelty and Distinctive Genomic Features of Hot Spring Cyanobacteria
Source: Front Genet. 2020 Nov 5;11:568223. doi: 10.3389/fgene.2020.568223 (PMC7674949; doi:10.3389/fgene.2020.568223)
Supplement: Supplementary file 7 [file Table_6.xlsx]

## Sheet: Supplementary_table_6a
Orthogroup	Shared orders	Shared families	Shared Genera	Consensus annotation	Highest sharing level	Sequence accession - annotation
OG0006951	6	7	7	hypothetical protein/transcriptional regulator	Order 6	BBJPKNOK_02091 Alkaline phosphatase synthesis transcriptional regulatory protein SphR	WP_009459133.1 winged helix-turn-helix transcriptional regulator [Fischerella thermalis]	MDFOAGLJ_00416 hypothetical protein	MDFOAGLJ_04788 hypothetical protein	IKBLCBBK_01709 Transcriptional regulatory protein CusR	MELGEKHO_01914 hypothetical protein	MELGEKHO_06860 Transcriptional regulatory protein PrrA	BIACENML_00779 hypothetical protein	BIACENML_01091 hypothetical protein	JBOCMMFJ_01400 hypothetical protein	DKAIEALO_00789 hypothetical protein
OG0008188	6	6	6	hypothetical protein	Order 6	CGKPCLBM_02351 hypothetical protein	FBHCODPJ_01114 hypothetical protein	IKBLCBBK_02978 hypothetical protein	BELDJAAI_02003 hypothetical protein	BELDJAAI_02004 hypothetical protein	DEBLJGBA_00879 hypothetical protein	DNLDGMPB_02782 hypothetical protein	JOMECIMD_02512 hypothetical protein
OG0007297	5	6	5	hypothetical protein	Order 5	LCOGNMFB_01532 hypothetical protein	IKBLCBBK_02139 hypothetical protein	JGBJHLMH_01300 hypothetical protein	JGBJHLMH_01301 hypothetical protein	CGLELAIP_00099 hypothetical protein	CGLELAIP_00100 hypothetical protein	DKAIEALO_00374 hypothetical protein	MPCBCHGE_00498 hypothetical protein	CCJPDAIG_01650 hypothetical protein	MGJIMEHN_00144 hypothetical protein
OG0006471	5	5	5	hypothetical protein	Order 5	LCOGNMFB_00511 hypothetical protein	LCOGNMFB_00512 hypothetical protein	LCOGNMFB_00513 hypothetical protein	LCOGNMFB_00514 hypothetical protein	EJENNGBJ_03556 hypothetical protein	CGLELAIP_01468 hypothetical protein	KIMBLIHA_02042 hypothetical protein	DEBLJGBA_01023 hypothetical protein	DEBLJGBA_01757 hypothetical protein	DEBLJGBA_01758 hypothetical protein	MPCBCHGE_00524 hypothetical protein	CCJPDAIG_01167 hypothetical protein	JOMECIMD_01362 hypothetical protein
OG0007988	5	5	5	hypothetical protein	Order 5	IKBLCBBK_01031 hypothetical protein	JGBJHLMH_01042 hypothetical protein	EJENNGBJ_03906 hypothetical protein	EJENNGBJ_04093 hypothetical protein	CGLELAIP_00001 hypothetical protein	KIMBLIHA_00471 hypothetical protein	DEBLJGBA_01500 hypothetical protein	MPCBCHGE_00325 hypothetical protein	JOMECIMD_03209 hypothetical protein
OG0009059	5	5	5	hypothetical protein	Order 5	BIACENML_00965 hypothetical protein	JBOCMMFJ_00899 hypothetical protein	CGLELAIP_01279 hypothetical protein	CGLELAIP_01280 hypothetical protein	DEBLJGBA_00633 hypothetical protein	DNLDGMPB_03523 hypothetical protein	BPEPJIDP_01972 hypothetical protein
OG0009060	5	5	5	hypothetical protein	Order 5	JGBJHLMH_01583 hypothetical protein	JGBJHLMH_01584 hypothetical protein	CGLELAIP_02637 hypothetical protein	KIMBLIHA_00975 hypothetical protein	DIDCHLDN_03280 hypothetical protein	BGNIABOK_00739 hypothetical protein	JOMECIMD_01882 hypothetical protein
OG0010755	5	5	5	hypothetical protein	Order 5	FBHCODPJ_00635 hypothetical protein	MDFOAGLJ_04536 hypothetical protein	EJENNGBJ_01857 hypothetical protein	MPCBCHGE_00214 hypothetical protein	NGHNHAMG_00162 hypothetical protein
OG0008126	4	7	5	hypothetical protein	Family 7	LCOGNMFB_00609 hypothetical protein	LCOGNMFB_00610 hypothetical protein	LCOGNMFB_00611 hypothetical protein	LCOGNMFB_00612 hypothetical protein	NMCAJKPD_03863 hypothetical protein	DFOEJFOJ_00501 hypothetical protein	CGLELAIP_01261 hypothetical protein	CMJNDOFB_02923 hypothetical protein
OG0007287	4	6	8	hypothetical protein	Family 6	OLDKOBJA_04969 hypothetical protein	GFKJMKOP_04452 hypothetical protein	MPLMGOMK_00578 hypothetical protein	IKBLCBBK_00352 hypothetical protein	KFHOCLEG_01232 hypothetical protein	KFHOCLEG_02495 hypothetical protein	DFOEJFOJ_01227 hypothetical protein	CCJPDAIG_02106 hypothetical protein	DIDCHLDN_00861 hypothetical protein	BGNIABOK_03397 hypothetical protein
OG0005615	4	6	6	hypothetical protein/DsrE family protein	Family 6	GFKJMKOP_01595 hypothetical protein	BNEJDEKH_00514 hypothetical protein	NP_683068.1 hypothetical protein tlr2278 [Thermosynechococcus elongatus BP-1]	WP_011429096.1 MULTISPECIES_ DsrE family protein [unclassified Synechococcus]	WP_011434083.1 DsrE family protein [Synechococcus sp. JA-2-3B'a_2-13_]	WP_015144520.1 DsrE family protein [Pleurocapsa minor]	WP_073601190.1 DsrE family protein [Hydrococcus rivularis]	WP_099887279.1 DsrE family protein [Synechococcus sp. 63AY4M2]	WP_102179652.1 sulfur reduction protein DsrE [Fischerella thermalis]	WP_149818687.1 sulfur reduction protein DsrE [Thermosynechococcus sp. CL-1]	KFHOCLEG_00056 hypothetical protein	BELDJAAI_00510 hypothetical protein	KIMBLIHA_01838 hypothetical protein	KIMBLIHA_01840 hypothetical protein	DEBLJGBA_00768 hypothetical protein	DEBLJGBA_00770 hypothetical protein	OJBFDBEM_01256 hypothetical protein	OJBFDBEM_01257 hypothetical protein
OG0009058	4	6	5	hypothetical protein	Family 6	IKBLCBBK_01762 hypothetical protein	DFOEJFOJ_00637 hypothetical protein	DFOEJFOJ_00638 hypothetical protein	JGBJHLMH_00620 hypothetical protein	CGLELAIP_02463 hypothetical protein	CGLELAIP_02464 hypothetical protein	MGJIMEHN_01218 hypothetical protein
OG0006107	4	5	6	hypothetical protein	Family 5	CGKPCLBM_02555 hypothetical protein	FBHCODPJ_01773 hypothetical protein	FBHCODPJ_03050 hypothetical protein	MDFOAGLJ_01703 hypothetical protein	MELGEKHO_06795 hypothetical protein	DFOEJFOJ_02752 hypothetical protein	JGBJHLMH_00672 hypothetical protein	JGBJHLMH_01002 hypothetical protein	DKAIEALO_01269 hypothetical protein	DEBLJGBA_00766 hypothetical protein	CCJPDAIG_01298 hypothetical protein	DIDCHLDN_02138 hypothetical protein	DIDCHLDN_02266 hypothetical protein	JOMECIMD_00748 hypothetical protein	JOMECIMD_00904 hypothetical protein
OG0007177	4	5	6	hypothetical protein	Family 5	DELBLAAG_03541 hypothetical protein	DELBLAAG_03542 hypothetical protein	IKBLCBBK_02110 hypothetical protein	DFOEJFOJ_00777 hypothetical protein	DFOEJFOJ_00778 hypothetical protein	JGBJHLMH_01262 hypothetical protein	BELDJAAI_03500 hypothetical protein	MPCBCHGE_00880 hypothetical protein	BPEPJIDP_02783 hypothetical protein	JAIHOBHD_02045 hypothetical protein	JOMECIMD_03513 hypothetical protein
OG0007552	4	5	6	hypothetical protein	Family 5	WP_015189238.1 hypothetical protein [Gloeocapsa sp. PCC 7428]	DELBLAAG_03299 hypothetical protein	IKBLCBBK_00015 hypothetical protein	IKBLCBBK_02225 hypothetical protein	DFOEJFOJ_00803 hypothetical protein	DFOEJFOJ_02890 hypothetical protein	BPEPJIDP_00038 hypothetical protein	BPEPJIDP_02622 hypothetical protein	DIDCHLDN_01838 hypothetical protein	BGNIABOK_03559 hypothetical protein
OG0008506	4	5	6	hypothetical protein	Family 5	DELBLAAG_03536 hypothetical protein	IKBLCBBK_00152 hypothetical protein	IKBLCBBK_02417 hypothetical protein	DFOEJFOJ_03104 hypothetical protein	MPCBCHGE_00697 hypothetical protein	BPEPJIDP_00556 hypothetical protein	JAIHOBHD_00842 hypothetical protein	JOMECIMD_00963 hypothetical protein
OG0008694	4	5	6	hypothetical protein	Family 5	CGKPCLBM_01638 hypothetical protein	DELBLAAG_04087 hypothetical protein	JKMKJODE_02249 hypothetical protein	DEBLJGBA_01512 hypothetical protein	MPCBCHGE_00028 hypothetical protein	MGJIMEHN_01345 hypothetical protein	JOMECIMD_02654 hypothetical protein
OG0008672	4	5	5	hypothetical protein	Family 5	MPLMGOMK_03560 hypothetical protein	MPLMGOMK_05186 hypothetical protein	WP_016873192.1 PAS domain-containing protein [Chlorogloeopsis fritschii]	IKBLCBBK_00697 hypothetical protein	MELGEKHO_04632 hypothetical protein	CGLELAIP_01215 hypothetical protein	JAIHOBHD_01387 hypothetical protein
OG0009057	4	5	5	hypothetical protein	Family 5	DELBLAAG_01562 hypothetical protein	IKBLCBBK_02626 hypothetical protein	DFOEJFOJ_00989 hypothetical protein	DFOEJFOJ_00990 hypothetical protein	BIACENML_01732 hypothetical protein	BPEPJIDP_01698 hypothetical protein	JAIHOBHD_01254 hypothetical protein
OG0010754	4	5	5	hypothetical protein	Family 5	FBHCODPJ_00629 hypothetical protein	IKBLCBBK_01549 hypothetical protein	DEBLJGBA_00475 hypothetical protein	OJBFDBEM_01831 hypothetical protein	JOMECIMD_02269 hypothetical protein
OG0007685	4	5	4	hypothetical protein/restriction endonuclease	Family 5	LCOGNMFB_02656 hypothetical protein	WP_024124492.1 type IIG restriction enzyme/N6-adenine DNA methyltransferase of unknown recognition sequence [Thermosynechococcus sp. NK55a]	WP_073601419.1 restriction endonuclease [Hydrococcus rivularis]	WP_149820447.1 DEAD/DEAH box helicase family protein [Thermosynechococcus sp. CL-1]	EBLKIFOK_01535 hypothetical protein	JBOCMMFJ_01419 hypothetical protein	JBOCMMFJ_01605 hypothetical protein	NGHNHAMG_02526 hypothetical protein	NGHNHAMG_02813 hypothetical protein
OG0008116	4	5	4	hypothetical protein	Family 5	LEDLACFN_00039 hypothetical protein	IKBLCBBK_00023 hypothetical protein	JGBJHLMH_00163 hypothetical protein	JGBJHLMH_01430 hypothetical protein	CGLELAIP_01005 hypothetical protein	CGLELAIP_02953 hypothetical protein	DEBLJGBA_01667 hypothetical protein	CCJPDAIG_00405 hypothetical protein
OG0012078	4	5	4	hypothetical protein	Family 5	IKBLCBBK_01635 hypothetical protein	BAMPNMGJ_01935 hypothetical protein	CGLELAIP_02548 hypothetical protein	DNLDGMPB_02819 hypothetical protein
OG0007247	4	4	6	Aspartate/alanine antiporter	Genus 6	CGAHPCEH_00455 Aspartate/alanine antiporter	LEDLACFN_01074 Aspartate/alanine antiporter	BNEJDEKH_02858 Aspartate/alanine antiporter	WP_009554437.1 permease [Oscillatoriales cyanobacterium JSC-12]	WP_016876023.1 hypothetical protein [Chlorogloeopsis fritschii]	EJENNGBJ_03748 Aspartate/alanine antiporter	BELDJAAI_03219 Aspartate/alanine antiporter	DNLDGMPB_01668 Aspartate/alanine antiporter	JAIHOBHD_00080 Aspartate/alanine antiporter	MGJIMEHN_01897 Aspartate/alanine antiporter
OG0006580	3	6	4	SDR family oxidoreductase/Decaprenylphosphoryl-2-keto-beta-D-erythro-pentose reductase	Family 6	AXY67986.1 SDR family oxidoreductase [Thermosynechococcus elongatus PKUAC-SCTE542]	RMG12948.1 SDR family oxidoreductase [Cyanobacteria bacterium J055]	NP_682968.1 short chain dehydrogenase [Thermosynechococcus elongatus BP-1]	WP_024125187.1 SDR family oxidoreductase [Thermosynechococcus sp. NK55a]	WP_099704150.1 SDR family oxidoreductase [Chroococcales cyanobacterium IPPAS B-1203]	WP_149818509.1 SDR family oxidoreductase [Thermosynechococcus sp. CL-1]	IKBLCBBK_00869 Decaprenylphosphoryl-2-keto-beta-D-erythro-pentose reductase	EBLKIFOK_02033 Decaprenylphosphoryl-2-keto-beta-D-erythro-pentose reductase	NMCAJKPD_01636 putative oxidoreductase	BIACENML_00874 Decaprenylphosphoryl-2-keto-beta-D-erythro-pentose reductase	BAMPNMGJ_01036 Decaprenylphosphoryl-2-keto-beta-D-erythro-pentose reductase	BIEDLMKO_02592 putative oxidoreductase	ELEJODGH_00231 Decaprenylphosphoryl-2-keto-beta-D-erythro-pentose reductase
OG0007965	3	5	7	hypothetical protein/IS5 family transposase	Family 5	WP_016874817.1 IS5 family transposase_ partial [Chlorogloeopsis fritschii]	WP_139253734.1 hypothetical protein [Hydrococcus rivularis]	WP_131826701.1 hypothetical protein [Mastigocladus laminosus]	WP_105221734.1 IS5 family transposase [Gloeocapsopsis sp. AAB1 = 1H9]	DELBLAAG_00334 hypothetical protein	DELBLAAG_00335 IS5 family transposase ISGme3	MELGEKHO_02127 IS5 family transposase ISGme3	MELGEKHO_02128 hypothetical protein	MGJIMEHN_00129 hypothetical protein
OG0008066*	3	5	7	hypothetical protein	Family 5	CGAHPCEH_00038 hypothetical protein	OLDKOBJA_02101 hypothetical protein	GFKJMKOP_03161 hypothetical protein	BNEJDEKH_01158 hypothetical protein	FBHCODPJ_00762 hypothetical protein	EJENNGBJ_02454 hypothetical protein	BPEPJIDP_02849 hypothetical protein	JEFKBCLF_01482 hypothetical protein
OG0006274	3	5	6	hypothetical protein	Family 5	GFKJMKOP_03220 hypothetical protein	CGKPCLBM_02372 hypothetical protein	WP_009455319.1 hypothetical protein [Fischerella thermalis]	WP_009554079.1 hypothetical protein [Oscillatoriales cyanobacterium JSC-12]	WP_015143009.1 hypothetical protein [Pleurocapsa minor]	WP_158673140.1 hypothetical protein [[Leptolyngbya] sp. JSC-1]	WP_062250807.1 MULTISPECIES_ hypothetical protein [Fischerella]	WP_139253667.1 hypothetical protein [Hydrococcus rivularis]	WP_102149133.1 hypothetical protein [Fischerella thermalis]	WP_009455319.1 hypothetical protein [Fischerella thermalis]	FBHCODPJ_00724 hypothetical protein	MELGEKHO_00319 hypothetical protein	BEKGGNPI_00526 hypothetical protein	JEFKBCLF_00932 hypothetical protein
OG0007255	3	5	6	hypothetical protein	Family 5	CGAHPCEH_02433 hypothetical protein	GFKJMKOP_00761 hypothetical protein	IPENKKOB_01942 hypothetical protein	LPADKOCD_02132 hypothetical protein	DFOEJFOJ_03094 hypothetical protein	EJENNGBJ_03949 hypothetical protein	BDAFFNNF_02959 hypothetical protein	CMJNDOFB_03225 hypothetical protein	DNLDGMPB_02321 hypothetical protein	NGHNHAMG_01142 hypothetical protein
OG0008146	3	5	6	D-inositol-3-phosphate glycosyltransferase/glicosyltransferase	Family 5	GFKJMKOP_03880 D-inositol 3-phosphate glycosyltransferase	BNEJDEKH_01961 D-inositol-3-phosphate glycosyltransferase	WP_009768166.1 glycosyltransferase [Oscillatoriales cyanobacterium JSC-12]	WP_015144675.1 glycosyltransferase [Pleurocapsa minor]	WP_017321652.1 glycosyltransferase [cyanobacterium PCC 7702]	WP_073549370.1 glycosyltransferase [Chroogloeocystis siderophila]	BELDJAAI_02132 D-inositol-3-phosphate glycosyltransferase	MGJIMEHN_05363 D-inositol-3-phosphate glycosyltransferase
OG0010015	3	5	4	hypothetical protein	Family 5	LEDLACFN_05011 hypothetical protein	WP_009555828.1 hypothetical protein [Oscillatoriales cyanobacterium JSC-12]	NJPIHGON_00619 hypothetical protein	BIEDLMKO_02026 hypothetical protein	MGJIMEHN_04111 hypothetical protein
OG0010743	3	5	4	hypothetical protein	Family 5	WP_157780784.1 hypothetical protein [Calothrix sp. NIES-3974]	NMCAJKPD_00836 hypothetical protein	CGLELAIP_01724 hypothetical protein	BIEDLMKO_00472 hypothetical protein	JOMECIMD_00712 hypothetical protein
OG0008058	3	4	6	hypothetical protein	Genus 6	BBJPKNOK_01544 hypothetical protein	CGAHPCEH_00042 hypothetical protein	OLDKOBJA_00355 hypothetical protein	BNEJDEKH_01155 hypothetical protein	WP_009768463.1 hypothetical protein [Oscillatoriales cyanobacterium JSC-12]	WP_017323696.1 hypothetical protein [cyanobacterium PCC 7702]	EJENNGBJ_02537 hypothetical protein	BDAFFNNF_01774 hypothetical protein
OG0009814	3	4	6	hypothetical protein	Genus 6	DFOEJFOJ_00894 hypothetical protein	EJENNGBJ_02943 hypothetical protein	DNLDGMPB_03184 hypothetical protein	BPEPJIDP_00041 hypothetical protein	BGNIABOK_02317 hypothetical protein	JOMECIMD_02226 hypothetical protein
OG0007652	3	3	6	hypothetical protein	Genus 6	CGAHPCEH_03538 hypothetical protein	RMF70373.1 hypothetical protein D6742_00430 [Cyanobacteria bacterium J069]	WP_036010576.1 hypothetical protein [[Leptolyngbya] sp. JSC-1]	WP_068508722.1 hypothetical protein [Leptolyngbya sp. O-77]	MDFOAGLJ_03557 hypothetical protein	MELGEKHO_03455 hypothetical protein	EJENNGBJ_02854 hypothetical protein	BDAFFNNF_00103 hypothetical protein	DNLDGMPB_03290 hypothetical protein
OG0008645	2	5	4	hypothetical protein/methyltransferase	Family 5	GFKJMKOP_01007 hypothetical protein	WP_015143871.1 class I SAM-dependent methyltransferase [Pleurocapsa minor]	NJPIHGON_03748 tRNA U34 carboxymethyltransferase	MDFOAGLJ_01380 hypothetical protein	NMCAJKPD_03788 hypothetical protein	BIEDLMKO_03119 hypothetical protein	JEFKBCLF_02821 tRNA U34 carboxymethyltransferase
OG0006223*	2	4	7	hypothetical protein	Genus 7	BBJPKNOK_00473 hypothetical protein	CGAHPCEH_00036 hypothetical protein	OLDKOBJA_00352 hypothetical protein	GFKJMKOP_03159 hypothetical protein	BNEJDEKH_01160 hypothetical protein	WP_009453950.1 hypothetical protein [Fischerella thermalis]	WP_017323692.1 hypothetical protein [cyanobacterium PCC 7702]	WP_073547837.1 hypothetical protein [Chroogloeocystis siderophila]	WP_096620526.1 hypothetical protein [Calothrix sp. NIES-3974]	WP_102173047.1 hypothetical protein [Fischerella thermalis]	WP_102179783.1 hypothetical protein [Fischerella thermalis]	WP_102185970.1 hypothetical protein [Fischerella thermalis]	WP_146087194.1 hypothetical protein [Chroococcidiopsis sp. TS-821]	FBHCODPJ_00739 hypothetical protein
OG0006702	2	3	6	hypothetical protein	Genus 6	CGAHPCEH_03664 hypothetical protein	BNEJDEKH_02725 hypothetical protein	IPENKKOB_00248 hypothetical protein	LPADKOCD_01272 hypothetical protein	MELGEKHO_04462 hypothetical protein	EJENNGBJ_00432 hypothetical protein	BDAFFNNF_03957 hypothetical protein	BELDJAAI_01404 hypothetical protein	DNLDGMPB_00151 hypothetical protein	JAIHOBHD_02149 hypothetical protein	BGNIABOK_02878 hypothetical protein	NGHNHAMG_01017 hypothetical protein
